# Supplementary material for: Investigation of the Effect of Confining Pressure on the Mechanics-Permeability Behavior of Mudstone under Triaxial Compression
Source: Hindawi journal article supplement (doi:10.1155/2019/1796380), 2019-06-04
Supplement: f1 [file 1796380.f1.zip]

Archive with 4 entries (4 files):
- Table_S1.xlsx
- Table_S2.xlsx
- Table_S3.xlsx
- Table_S4.xlsx
