# Supplementary material for: Investigation of the Effect of Confining Pressure on the Mechanics-Permeability Behavior of Mudstone under Triaxial Compression
Source: Hindawi journal article supplement (doi:10.1155/2019/1796380), 2019-06-04
Supplement: f1 [file 1796380.f1.zip › Table_S1.xlsx]

## Sheet: Sheet1
Table S1: The data for relaionship of deviatoric stress and strain in the directioin of the maximum principal stress
P4		P5		P6		P7		P8		P9
ϵ1 (%)	σ1-σ3 (MPa)	ϵ1 (%)	σ1-σ3 (MPa)	ϵ1 (%)	σ1-σ3 (MPa)	ϵ1 (%)	σ1-σ3 (MPa)	ϵ1 (%)	σ1-σ3 (MPa)	ϵ1 (%)	σ1-σ3 (MPa)
0	3.98129	0	3.92952	0	4.02203	0	4.01655	0	3.99913	0	4.09608
0.0154195	5.02104	0.057696	8.01821	0.00100204	4.49322	-0.000257143	4.77436	0.00148163	4.41345	0.015236	5.3821
0.0253321	5.3158	0.08046	9.59438	0.00163878	4.74027	0.00643061	6.60776	0.00277755	4.70811	0.055956	9.08986
0.0352446	5.6842	0.083428	9.48552	0.00188163	4.7687	0.0122796	7.65233	0.00437347	5.02981	0.064904	9.98198
0.0451572	6.05264	0.083532	9.29539	0.0013898	4.7278	0.0137347	7.5301	0.00578571	5.21603	0.0686	10.3291
0.060026	6.49472	0.0854	9.66168	0.00161429	4.87327	0.0131857	6.79149	0.0068102	5.3377	0.070252	10.1283
0.0748948	6.86316	0.090536	10.2625	0.00352653	5.27944	0.010098	5.57383	0.00797959	5.55301	0.069804	9.58968
0.0848073	7.0842	0.094636	10.2638	0.0057449	5.73527	0.00534082	4.85696	0.00963061	5.86026	0.06914	9.27475
0.0947202	7.45264	0.093932	9.27566	0.00773878	6.10993	0.00824082	5.953	0.0109939	6.00507	0.069028	9.32918
0.109588	7.74736	0.089788	7.72814	0.00946735	6.37097	0.0144612	7.22939	0.0123796	6.19205	0.069528	9.72835
0.124457	8.18948	0.08444	6.19205	0.0105408	6.54796	0.0173755	7.44544	0.0138367	6.36916	0.07056	10.2087
0.13437	8.41052	0.079728	5.14834	0.0118	6.75029	0.0178122	7.13167	0.0155367	6.58447	0.07246	10.6916
0.144282	8.70528	0.076856	4.68355	0.0134653	6.96642	0.0166122	6.31109	0.0170918	6.73962	0.074656	10.9117
0.154195	8.92632	0.076196	4.76381	0.0150857	7.11693	0.0129224	5.73436	0.0190388	6.97477	0.076044	10.8275
0.164107	9.14736	0.077084	5.2908	0.0166184	7.22713	0.0153245	6.58002	0.0207531	7.12873	0.076	10.4689
0.17402	9.36844	0.078568	5.97062	0.0185857	7.43398	0.0201429	7.50162	0.0226796	7.34219	0.075436	10.1078
0.183932	9.66316	0.079936	6.51317	0.0209878	7.64598	0.0223714	7.65086	0.0246592	7.53527	0.075144	9.972
0.193845	9.81052	0.080544	6.68261	0.0228163	7.65784	0.0230918	7.43809	0.0267388	7.73623	0.0753	10.1119
0.208714	10.1053	0.079968	6.34872	0.0244694	7.58327	0.0216429	6.786	0.0286878	7.91787	0.075836	10.4522
0.218626	10.3263	0.078144	5.55754	0.0264327	7.65331	0.0214224	6.79861	0.0308612	8.11202	0.077288	10.9585
0.228539	10.5474	0.075472	4.65619	0.0294898	7.93207	0.0244449	7.61591	0.0328531	8.27246	0.07916	11.2331
0.238451	10.6947	0.073044	4.05274	0.0324286	8.13887	0.0275653	7.99979	0.0349061	8.45669	0.08044	11.1709
0.248364	10.8421	0.071888	3.94392	0.0353449	8.32254	0.0287388	7.99318	0.0372245	8.639	0.080456	10.8715
0.307839	10.8421	0.072208	4.23274	0.0382204	8.45927	0.0288531	7.59416	0.0392714	8.76659	0.080324	10.7419
0.307839	11.0632	0.073568	4.84267	0.0406714	8.36214	0.027649	7.33445	0.0413367	8.93123	0.080376	10.7847
0.307839	11.2842	0.075208	5.50056	0.0409571	7.98096	0.0293265	7.58153	0.0433837	9.07604	0.080892	11.0141
0.317752	11.5053	0.076644	6.0109	0.0417918	8.08668	0.0312449	7.75266	0.0457041	9.22678	0.081732	11.2525
0.322157	11.7509	0.07776	6.36422	0.0442204	8.47913	0.0323918	7.80358	0.0479143	9.3853	0.08308	11.4871
0.334273	12.0784	0.078472	6.54	0.0463204	8.63508	0.033602	7.90136	0.0502939	9.5497	0.084304	11.5299
0.341982	12.283	0.078768	6.56851	0.0474122	8.39461	0.0349388	7.99717	0.0527429	9.7141	0.084824	11.3199
0.352446	12.6269	0.079148	6.66053	0.0472327	7.68504	0.0362959	8.13715	0.0553694	9.9023	0.084584	10.9856
0.377227	13.0526	0.080288	7.00138	0.0446857	6.41978	0.0381388	8.33402	0.0577673	10.0528	0.084388	10.8339
0.406965	13.6421	0.082116	7.52362	0.0412265	5.251	0.0395163	8.412	0.0598776	10.1354	0.084368	10.7899
0.42679	14.0105	0.08412	8.00654	0.0390061	4.76145	0.0409776	8.53558	0.0621265	10.2789	0.084368	10.7743
0.451571	14.379	0.085596	8.29378	0.0388224	5.11232	0.0429633	8.66574	0.0639898	10.3047	0.084444	10.8223
0.476352	14.7474	0.086252	8.32598	0.0416265	6.26853	0.0440469	8.50722	0.0656776	10.3669	0.084876	11.0594
0.496177	15.0421	0.086384	8.26507	0.0462918	7.55496	0.0446735	8.44048	0.0674388	10.4799	0.085728	11.3834
0.516002	15.3368	0.087096	8.46466	0.0501776	8.34779	0.0459694	8.55144	0.0693061	10.5692	0.087232	11.736
0.535828	15.6316	0.088624	8.85216	0.0522531	8.39138	0.0484816	8.92866	0.0707694	10.6049	0.088556	11.8059
0.555653	15.9263	0.090844	9.31469	0.0520796	7.67251	0.0504796	9.01856	0.072502	10.7623	0.089024	11.504
0.580434	16.2947	0.092972	9.67709	0.0493857	6.39465	0.0513265	8.93466	0.0743327	10.8654	0.088396	10.9107
0.600259	16.5158	0.095032	9.98506	0.0459143	5.34811	0.0521898	8.95244	0.0757469	10.8628	0.087688	10.4317
0.615128	16.7368	0.096924	10.2701	0.044449	5.26288	0.0539163	9.11035	0.0768122	10.8079	0.087524	10.3552
0.734078	16.8105	0.098836	10.4826	0.0468224	6.30081	0.0561469	9.33365	0.0781694	10.8971	0.087988	10.6735
0.734078	17.2526	0.09966	10.3621	0.0512816	7.5866	0.0574633	9.33764	0.0797041	10.9459	0.08886	11.1903
0.743991	17.4737	0.099104	9.84677	0.0549041	8.33782	0.0581	9.20025	0.0807776	10.8924	0.090204	11.7148
0.748947	17.6947	0.098312	9.42216	0.0563306	8.27638	0.0593633	9.27034	0.0818082	10.93	0.091692	12.0539
0.753903	17.8421	0.098056	9.28502	0.0553306	7.45112	0.061651	9.67335	0.0834939	11.1493	0.093128	12.1728
0.763816	18.1368	0.098844	9.63067	0.0514061	6.01337	0.0661224	10.1483	0.0848531	11.1697	0.094168	12.1549
0.768772	18.3579	0.100676	10.2108	0.0472143	4.87033	0.0670714	9.8642	0.0858408	11.2007	0.094544	11.9143
0.778685	18.579	0.102716	10.6083	0.0451735	4.73755	0.0664122	9.51404	0.0870061	11.3155	0.0944	11.6672
0.788597	18.8737	0.103132	10.3105	0.0467653	5.71337	0.0679714	9.6878	0.0883796	11.4357	0.094364	11.5882
0.79851	19.0947	0.101728	9.53342	0.0506816	7.08176	0.0710857	10.186	0.0893755	11.4423	0.094756	11.7863
0.813379	19.3895	0.099732	8.7085	0.0545061	8.15082	0.0730673	10.1979	0.0902061	11.464	0.095732	12.1201
0.833204	19.6842	0.097824	8.01562	0.0564714	8.38273	0.0732082	9.79026	0.0913429	11.5599	0.0974	12.4566
0.848072	19.9053	0.096532	7.61304	0.0558857	7.75834	0.0739163	9.81073	0.0923612	11.5671	0.099228	12.6121
0.862941	20.1263	0.096076	7.52755	0.0525265	6.44895	0.0774224	10.5811	0.0930694	11.5367	0.100504	12.5746
0.87781	20.3474	0.096112	7.6079	0.0480673	5.03378	0.0835449	11.1922	0.0942816	11.6604	0.100884	12.3286
0.892679	20.4947	0.096024	7.61309	0.0445265	4.15376	0.0830469	10.3221	0.0955837	11.7099	0.100952	12.2171
0.902591	20.6421	0.095528	7.42776	0.0431469	4.18937	0.0808102	9.76239	0.0966878	11.7595	0.101456	12.3894
0.912504	20.7895	0.093876	6.90706	0.0446878	5.09525	0.0836612	10.4514	0.0981	11.901	0.102824	12.7158
1.04633	20.8632	0.091412	6.26342	0.0479776	6.29968	0.0901939	11.2998	0.099651	12.0154	0.10436	12.8804
1.05128	21.2316	0.088964	5.71824	0.0509163	7.19816	0.0905469	10.6715	0.10079	12.0518	0.105648	12.9063
1.05624	21.4526	0.086436	5.22446	0.051949	7.31312	0.088651	10.09	0.102163	12.2052	0.106416	12.8726
1.06615	21.821	0.08416	4.83466	0.050702	6.68089	0.0908816	10.4825	0.103637	12.2614	0.10694	12.8143
1.07607	22.1158	0.08268	4.68197	0.0470143	5.37125	0.0973592	11.4517	0.104982	12.3328	0.107372	12.8286
1.09093	22.4842	0.082116	4.72982	0.0423224	4.01077	0.098902	11.1208	0.10669	12.455	0.107908	12.861
1.1058	22.8526	0.082388	5.00674	0.0385449	3.18093	0.0972469	10.4106	0.10839	12.5409	0.109028	13.0554
1.12067	23.0737	0.084112	5.81122	0.0368959	3.19283	0.0990184	10.665	0.109927	12.5851	0.1104	13.1629
1.13058	23.2947	0.088812	7.4328	0.0373592	3.85357	0.105139	11.7941	0.111831	12.7488	0.111684	13.2226
1.14545	23.5158	0.095664	9.31325	0.0391449	4.79971	0.108061	11.7168	0.113598	12.8076	0.112584	13.2187
1.15537	23.7368	0.102128	10.5995	0.0411551	5.6784	0.106296	10.805	0.115376	12.9317	0.113332	13.194
1.17023	23.9579	0.106616	11.1527	0.0426388	6.25256	0.10711	10.8771	0.117359	13.0638	0.113644	13.0696
1.19006	24.179	0.10896	11.1838	0.0431694	6.3431	0.112314	11.9321	0.119282	13.1443	0.114112	13.1318
1.20493	24.4	0.109492	11.0023	0.0423163	5.82639	0.116337	12.0127	0.120835	13.2065	0.115468	13.4528
1.2198	24.5474	0.108924	10.6265	0.0402653	4.88953	0.114873	10.9906	0.122994	13.3691	0.117432	13.6378
1.23467	24.6947	0.107408	9.95045	0.0378306	3.87681	0.114637	10.8691	0.124908	13.4094	0.118908	13.5732
1.24458	24.7684	0.104764	8.90923	0.0354184	2.96177	0.119369	11.934	0.126933	13.5337	0.119528	13.4829
1.27432	24.7684	0.101548	7.83557	0.0335327	2.35315	0.124529	12.3476	0.129298	13.658	0.120056	13.5282
1.27927	24.9895	0.098604	7.01434	0.0324694	2.1106	0.123898	11.609	0.131943	13.8108	0.12096	13.6741
1.28919	25.1368	0.096688	6.59717	0.0321122	2.13571	0.123027	11.344	0.13419	13.8617	0.122172	13.7841
1.30405	25.3579	0.095348	6.354	0.0320224	2.2069	0.126508	12.115	0.136694	14.0308	0.123272	13.7814
1.31892	25.579	0.094548	6.2663	0.0319816	2.25171	0.131933	12.6336	0.139114	14.0777	0.123924	13.7179
1.33379	25.8	0.094276	6.31646	0.0318612	2.23981	0.1314	11.7813	0.141502	14.2065	0.124476	13.7257
1.3437	25.9474	0.09434	6.43392	0.0317714	2.25436	0.129347	11.2462	0.143847	14.2909	0.125424	13.8979
1.35857	26.0947	0.094308	6.46613	0.0319061	2.38727	0.132953	12.1976	0.146304	14.4249	0.126764	13.9964
1.36849	26.2421	0.094164	6.44539	0.0325857	2.80624	0.139631	13.0684	0.148596	14.4942	0.12806	14.0689
1.3784	26.3895	0.094008	6.43373	0.0346959	3.76896	0.139743	12.4117	0.151106	14.6355	0.129132	14.0871
1.38831	26.5368	0.093856	6.41438	0.0395735	5.30383	0.138057	11.8924	0.153518	14.687	0.130148	14.1286
1.40814	26.7579	0.093704	6.3887	0.0456265	6.89417	0.140882	12.6112	0.155741	14.7604	0.130864	14.0806
1.42796	26.979	0.093596	6.38352	0.0507551	7.93078	0.147294	13.3677	0.158037	14.8226	0.131528	14.1169
1.44283	27.2	0.093564	6.40915	0.0543286	8.26114	0.146557	12.3787	0.160141	14.8682	0.132688	14.323
1.46265	27.421	0.09354	6.42725	0.0558633	7.88846	0.143212	11.566	0.162261	14.9065	0.134168	14.4202
1.47752	27.5684	0.09358	6.47002	0.0550367	7.23438	0.146351	12.5504	0.164247	14.9581	0.135344	14.3722
1.49735	27.7895	0.094152	6.75384	0.0561571	7.37182	0.153345	13.5765	0.166661	15.0315	0.135744	14.2089
1.51717	27.9368	0.095396	7.31885	0.060302	8.05166	0.154792	13.4536	0.168745	15.0626	0.136212	14.2711
1.53204	28.1579	0.096964	7.97026	0.0647347	8.7348	0.15562	13.3525	0.1712	15.1373	0.1374	14.5122
1.54691	28.3053	0.098664	8.58538	0.0688286	9.20993	0.156916	13.4695	0.173045	15.1122	0.138828	14.6262
1.56178	28.4526	0.100292	9.10618	0.0721612	9.33482	0.159555	13.7575	0.175214	15.2107	0.139832	14.5796
1.57665	28.6	0.101604	9.48202	0.0732592	9.10158	0.16189	13.7998	0.176839	15.2226	0.14022	14.4344
1.59152	28.821	0.10242	9.66984	0.0758265	9.38642	0.163529	13.7271	0.178865	15.3396	0.140644	14.4487
1.7749	28.821	0.102832	9.7177	0.0797592	9.84103	0.165161	13.7807	0.18058	15.3747	0.141696	14.6625
1.77986	28.0105	0.103456	9.86506	0.0830306	9.96722	0.166282	13.7133	0.182463	15.4745	0.143296	14.8297
1.76499	24.8421	0.104872	10.2495	0.0858082	9.91834	0.168671	13.7735	0.184484	15.5366	0.14444	14.783
1.75012	22.0421	0.106804	10.7081	0.0875265	9.4486	0.170261	13.5264	0.186376	15.5068	0.145072	14.7493
1.74516	20.421	0.10832	10.9414	0.0893837	9.43134	0.167927	12.5268	0.188135	15.5252	0.146044	14.8452
1.74021	18.4316	0.108896	10.9012	0.0927755	9.72331	0.166782	12.3432	0.190008	15.5788	0.147252	14.9813
1.74021	19.5368	0.108944	10.76	0.0967224	10.1653	0.170771	13.2892	0.192004	15.6547	0.148236	14.9684
1.74516	21.2316	0.109152	10.7742	0.100278	10.4097	0.173829	13.537	0.193643	15.6772	0.148888	14.9139
1.75012	22.8526	0.11012	11.0088	0.103539	10.5147	0.174978	13.6116	0.195616	15.81	0.14928	14.8427
1.75507	23.9579	0.111536	11.2291	0.104784	10.3912	0.17611	13.7007	0.197355	15.8298	0.14986	14.9049
1.76003	25.2842	0.112324	11.1396	0.107771	10.6443	0.177959	13.9484	0.199004	15.8614	0.150864	15.0797
1.76499	26.021	0.112184	10.8105	0.111414	10.9905	0.181373	14.3277	0.200696	15.8949	0.152216	15.1947
1.76994	27.3474	0.1119	10.5837	0.114898	11.2238	0.182759	14.327	0.20228	15.9186	0.15338	15.2116
1.78977	29.3368	0.111848	10.5021	0.117798	11.2153	0.183933	14.4036	0.203892	15.9654	0.154228	15.1909
1.80464	29.9263	0.111936	10.4891	0.119131	10.7296	0.186735	14.6184	0.205504	15.9852	0.155004	15.2423
1.81455	30.221	0.11208	10.4787	0.120449	10.7699	0.188004	14.4136	0.207061	16.0262	0.155976	15.3249
1.82942	30.7368	0.112244	10.4891	0.124051	11.2753	0.186673	13.8646	0.20889	16.0817	0.157148	15.4026
1.84429	31.179	0.11234	10.471	0.128341	11.9102	0.188133	13.8191	0.210602	16.0983	0.158156	15.3731
1.86411	31.621	0.112456	10.4736	0.132408	12.3635	0.187537	13.2106	0.212345	16.1558	0.158844	15.32
1.87898	31.9158	0.112532	10.4476	0.135829	12.5028	0.186786	13.087	0.214492	16.2814	0.159336	15.2992
1.90376	32.2842	0.112484	10.3569	0.138102	12.487	0.191741	14.2729	0.216573	16.3283	0.159952	15.3742
1.92854	32.579	0.112172	10.1302	0.140908	12.6144	0.197814	14.9435	0.218622	16.4361	0.160944	15.439
1.95828	32.8	0.111516	9.77294	0.143949	12.7955	0.197314	14.257	0.220806	16.5234	0.16188	15.4506
1.98802	33.1684	0.110448	9.2615	0.147047	12.9831	0.194876	13.8098	0.2233	16.6404	0.162528	15.4078
2.01776	33.3895	0.109072	8.68373	0.150049	13.1047	0.197102	14.4281	0.225494	16.6946	0.163144	15.492
2.03263	33.5368	0.107656	8.14766	0.152296	13.1219	0.201465	14.9216	0.228092	16.8361	0.164096	15.6074
2.05741	33.6842	0.106348	7.71787	0.155214	13.2541	0.201982	14.5781	0.230573	16.8996	0.165032	15.5828
2.08714	33.9053	0.105612	7.50034	0.158592	13.4867	0.200533	14.074	0.233394	17.0536	0.165632	15.5089
2.11688	34.2737	0.105356	7.45886	0.162118	13.7635	0.201661	14.2444	0.235941	17.0913	0.166212	15.5646
2.14662	34.5684	0.104872	7.30982	0.16582	14.1104	0.206102	14.9673	0.238576	17.2062	0.16722	15.7616
2.17636	34.7895	0.10372	6.96379	0.169314	14.2663	0.207678	14.8853	0.241194	17.2662	0.16844	15.8355
2.20609	35.1579	0.10212	6.5339	0.171457	14.2683	0.206786	14.2676	0.243818	17.3725	0.169264	15.7642
2.23583	35.5263	0.100508	6.16243	0.173088	14.1309	0.206039	14.1546	0.246529	17.4656	0.169452	15.5052
2.28044	35.8947	0.098756	5.81803	0.173745	13.6539	0.20869	14.8351	0.249118	17.5625	0.169252	15.2658
2.34487	36.6316	0.096988	5.50699	0.17298	12.7501	0.212022	15.1158	0.251996	17.6695	0.169224	15.2282
2.3647	36.9263	0.095596	5.29574	0.170363	11.51	0.212567	14.8159	0.254535	17.6939	0.169416	15.3198
2.4093	37.3684	0.094816	5.22187	0.167384	10.5156	0.211208	14.4572	0.257178	17.7593	0.169916	15.5167
2.444	37.7368	0.094472	5.20114	0.167024	10.6385	0.212684	14.7696	0.259696	17.803	0.170944	15.7487
2.45886	37.9579	0.093724	5.0508	0.169733	11.5305	0.217814	15.5115	0.262592	17.9081	0.172276	15.921
2.4886	38.2526	0.092388	4.77653	0.172886	12.2618	0.21938	15.3458	0.265176	17.959	0.173552	15.9703
2.51338	38.4	0.090764	4.52688	0.17498	12.5075	0.218192	14.6494	0.268127	18.1144	0.174236	15.8238
2.5233	38.4737	0.089292	4.37419	0.175222	12.1811	0.218635	14.726	0.270908	18.1904	0.174084	15.4134
2.5233	37.4421	0.08852	4.38845	0.172596	11.0229	0.223845	15.7554	0.273667	18.2784	0.173448	14.9304
2.51834	36.1158	0.088548	4.55539	0.16901	10.0179	0.226727	15.8644	0.276202	18.3458	0.173104	14.7455
2.50843	33.5368	0.089108	4.85299	0.168047	10.152	0.227437	15.5988	0.27882	18.4113	0.17322	14.8906
2.49851	31.9895	0.089948	5.24654	0.170006	11.0664	0.227324	15.4396	0.28109	18.4457	0.173884	15.31
2.49356	30.7368	0.090824	5.63918	0.173216	12.0773	0.229369	15.7369	0.283727	18.5362	0.174708	15.6335
2.4886	29.1158	0.091144	5.73898	0.175435	12.4737	0.232661	16.027	0.285765	18.4522	0.175456	15.7901
2.47869	27.421	0.090572	5.45645	0.175129	12.0687	0.234131	15.809	0.287757	18.468	0.17612	15.8744
2.47373	25.6526	0.089248	4.90867	0.17219	10.9073	0.23342	15.2164	0.289833	18.5353	0.176996	15.9482
2.46878	24.2526	0.087096	4.28318	0.167743	9.53111	0.234255	15.3591	0.291906	18.5545	0.17756	15.8433
2.47373	26.7579	0.084404	3.79358	0.164178	8.72574	0.240698	16.4974	0.293384	18.5526	0.177544	15.5931
2.47869	28.7474	0.082288	3.60307	0.164043	9.21005	0.24348	16.4332	0.295363	18.7271	0.177508	15.5141
2.4886	31.4	0.081748	3.80136	0.167173	10.3986	0.242541	15.5935	0.297178	18.776	0.1777	15.5841
2.49356	33.3158	0.083016	4.46318	0.170876	11.5172	0.24159	15.357	0.298814	18.7845	0.178016	15.7072
2.50347	35.4526	0.085604	5.53291	0.17302	11.9208	0.245227	16.0759	0.300255	18.7944	0.178744	15.8757
2.51834	36.8526	0.08898	6.69336	0.172596	11.5231	0.248937	16.2866	0.302139	18.8557	0.1795	15.9003
2.53321	37.6632	0.092052	7.5817	0.169678	10.3754	0.250035	16.0071	0.303765	18.8643	0.179836	15.7811
2.54808	38.1053	0.094148	8.06203	0.165178	8.97938	0.250663	15.8644	0.305196	18.8531	0.179984	15.7655
2.55799	38.5474	0.094652	8.04523	0.161231	7.99229	0.252624	15.9753	0.306357	18.8485	0.180336	15.8407
2.57286	38.8421	0.093696	7.55842	0.15992	8.10066	0.255269	16.1788	0.307647	18.8868	0.180824	15.9379
2.58277	39.1368	0.092124	6.90946	0.161827	9.06852	0.25731	16.1841	0.30892	18.9053	0.181468	16.0027
2.59764	39.3579	0.090816	6.42523	0.165427	10.3523	0.257963	15.8095	0.3098	18.7434	0.181912	15.912
2.61747	39.6526	0.09032	6.31651	0.169178	11.459	0.258612	15.7421	0.310769	18.7302	0.181712	15.5842
2.63729	39.8737	0.090708	6.55594	0.171135	11.7391	0.261906	16.3591	0.312349	18.8351	0.181388	15.3548
2.66207	40.0948	0.09214	7.22803	0.170063	11.0705	0.267537	16.889	0.313606	18.7843	0.181368	15.36
2.6819	40.3156	0.09494	8.20085	0.166329	9.78749	0.269155	16.6083	0.314822	18.8642	0.181676	15.5815
2.70668	40.5368	0.0988	9.15912	0.161702	8.51493	0.269745	16.3552	0.316435	19.0399	0.182268	15.8148
2.74633	40.9052	0.102088	9.66917	0.15868	8.06633	0.27209	16.5892	0.317731	19.0261	0.182924	15.9599
2.78598	41.2736	0.103368	9.64848	0.159518	8.81623	0.277784	17.349	0.31879	19.0499	0.183712	16.0649
2.82563	41.642	0.102316	9.05539	0.163055	10.0226	0.280182	17.2023	0.320098	19.1086	0.184448	16.0908
2.86528	42.0104	0.101008	8.50613	0.166578	10.8584	0.2801	16.5383	0.321333	19.1317	0.184884	15.9768
2.89502	42.2316	0.101048	8.6124	0.167704	10.8756	0.280924	16.4954	0.322912	19.2381	0.184852	15.8277
2.92475	42.4528	0.102796	9.34814	0.165898	10.0147	0.285449	17.3054	0.324733	19.3517	0.184952	15.8329
2.9644	42.6736	0.106408	10.2756	0.161857	8.71971	0.289712	17.524	0.326412	19.4046	0.185152	15.8653
2.9991	42.8948	0.110084	10.8883	0.158498	8.03194	0.290786	17.125	0.328206	19.472	0.185152	15.7655
3.03875	43.1896	0.111876	10.9583	0.158773	8.5658	0.290733	16.8819	0.330014	19.5408	0.185176	15.7266
3.08335	43.4844	0.111568	10.6667	0.162208	9.73851	0.293414	17.3397	0.331639	19.5242	0.185396	15.7966
3.10318	43.7052	0.110512	10.1524	0.165996	10.6713	0.298608	17.9303	0.333302	19.593	0.185848	15.9534
3.13787	43.8528	0.109512	9.72653	0.167902	10.9191	0.299871	17.6059	0.335245	19.6433	0.1866	16.1297
3.17752	44.0736	0.109212	9.62698	0.167084	10.3185	0.299378	17.0648	0.337186	19.7405	0.187888	16.3668
3.21717	44.2948	0.110252	10.1371	0.163655	9.14045	0.301116	17.2835	0.339135	19.7424	0.189136	16.4187
3.24691	44.3684	0.112384	10.8725	0.160763	8.50029	0.30672	18.2309	0.341324	19.9064	0.189872	16.2891
3.27169	44.5156	0.114992	11.4254	0.161804	9.06982	0.309112	18.0373	0.343792	19.9778	0.189748	15.9625
3.30639	44.6632	0.116876	11.5353	0.165108	10.1983	0.307551	17.1203	0.345973	20.0611	0.189248	15.5906
3.33612	44.7368	0.11716	11.226	0.168976	11.1492	0.307533	17.1342	0.348418	20.1278	0.188668	15.2321
3.36586	44.8104	0.115936	10.5411	0.171094	11.4148	0.313765	18.4232	0.3507	20.2447	0.188372	15.0551
3.3956	44.8104	0.113976	9.71347	0.170461	10.8241	0.317492	18.4172	0.353245	20.3028	0.188344	15.1068
3.43525	44.2212	0.112212	9.04262	0.166994	9.68109	0.315988	17.4381	0.355596	20.3932	0.188812	15.4627
3.45507	43.558	0.111328	8.76014	0.164388	9.07587	0.315967	17.3549	0.358502	20.5114	0.189864	16.0234
3.45507	42.3788	0.111156	8.7433	0.16548	9.62219	0.320755	18.2878	0.360957	20.5384	0.191612	16.4511
3.45012	38.9895	0.111292	8.83013	0.169806	10.8907	0.324557	18.3585	0.363822	20.6362	0.19294	16.4602
3.44021	36.8526	0.111328	8.8729	0.174896	12.1037	0.324094	17.5511	0.366435	20.726	0.193076	16.0519
3.43525	35.1579	0.111624	9.02453	0.179292	12.8926	0.323892	17.3628	0.369418	20.8066	0.192408	15.5649
3.43029	33.7579	0.11222	9.28632	0.182327	13.1384	0.326918	17.9753	0.371937	20.8516	0.19178	15.2024
3.42534	31.9895	0.112532	9.40296	0.1848	13.3551	0.331208	18.4119	0.375292	21.0306	0.191808	15.3086
3.42038	30.6632	0.112212	9.20986	0.187957	13.5607	0.332071	18.1702	0.377939	21.0082	0.192788	15.9056
3.41542	29.6316	0.111352	8.80037	0.191563	13.9413	0.332478	17.9772	0.381073	21.0961	0.193964	16.3591
3.45012	39.8737	0.109752	8.19043	0.195522	14.4565	0.334202	18.1021	0.38369	21.1338	0.19466	16.42
3.45507	40.9052	0.107648	7.50662	0.199224	14.8048	0.337039	18.4939	0.386833	21.227	0.19496	16.3967
3.46499	41.0528	0.10584	7.02989	0.201798	14.8663	0.338992	18.4867	0.38938	21.2561	0.195368	16.4394
3.49968	40.5368	0.104456	6.70848	0.204771	15.0644	0.339143	17.9793	0.392337	21.4022	0.19574	16.4226
3.52446	39.8737	0.10342	6.50251	0.208224	15.33	0.339347	17.9311	0.394602	21.4175	0.195772	16.2476
3.54429	39.1368	0.102984	6.46363	0.211906	15.6419	0.344122	19.0284	0.397349	21.537	0.195812	16.2036
3.5542	38.2526	0.102964	6.49723	0.214986	15.6346	0.34911	19.4301	0.399416	21.4828	0.196092	16.2943
3.55916	36.5579	0.102892	6.47659	0.217057	15.4628	0.348882	18.708	0.401829	21.5574	0.1965	16.42
3.56907	35.821	0.102244	6.29045	0.220131	15.5679	0.347418	18.2819	0.404039	21.566	0.197404	16.6063
3.61863	35.728	0.100724	5.93194	0.223082	15.6142	0.351357	19.2042	0.406447	21.6401	0.198508	16.7462
3.61863	34.1263	0.098788	5.56013	0.22658	15.8323	0.355696	19.4817	0.408612	21.6619	0.199312	16.6868
3.61863	32.6526	0.097224	5.33981	0.232433	16.5252	0.354618	18.4814	0.410873	21.726	0.19966	16.6027
3.61863	31.179	0.096584	5.33462	0.237608	16.8556	0.352396	18.0103	0.412802	21.7366	0.199976	16.6105
3.61368	29.6316	0.096652	5.4733	0.240202	16.7822	0.358002	19.438	0.414941	21.7841	0.200312	16.6351
3.61368	28.0842	0.097456	5.82566	0.243057	16.9091	0.362943	19.8767	0.41702	21.8197	0.200872	16.7203
3.60872	26.6842	0.09874	6.3384	0.24689	17.0782	0.362057	18.9855	0.418914	21.8158	0.20154	16.7888
3.59881	25.2105	0.100044	6.8304	0.249561	17.104	0.360727	18.7351	0.421037	21.9168	0.2019	16.6763
3.59385	23.3684	0.10058	6.98323	0.252261	17.2089	0.366073	19.8999	0.422959	21.9168	0.202188	16.6867
3.59385	21.6737	0.100444	6.83938	0.255984	17.4638	0.369376	19.9078	0.42478	21.9425	0.202856	16.7977
3.57402	19.0947	0.099716	6.4549	0.259561	17.5801	0.367502	18.8024	0.426567	21.9293	0.203504	16.8418
3.54429	15.4842	0.098536	5.91754	0.262051	17.6059	0.366494	18.7766	0.428314	21.9729	0.204052	16.8482
3.50464	12.3158	0.097064	5.3761	0.264627	17.7229	0.374033	20.2578	0.430057	21.961	0.205064	17.0475
3.47986	10.4	0.0959	5.05858	0.267576	17.8354	0.376786	20.0352	0.431827	22.0032	0.206504	17.1977
3.44516	8.33684	0.095288	5.02099	0.26982	17.8182	0.374027	18.8506	0.433788	22.029	0.20776	17.2353
3.41542	6.78948	0.095784	5.36184	0.271806	17.8182	0.374092	19.0059	0.435461	22.0198	0.208412	17.1601
3.38073	5.24212	0.097652	6.1571	0.274118	17.9107	0.380341	20.1224	0.437153	22.0482	0.209088	17.1873
3.36091	4.50528	0.100664	7.25016	0.276876	17.9987	0.381343	19.6197	0.438961	22.1129	0.20968	17.1899
3.34108	3.69474	0.104224	8.34715	0.279071	17.9425	0.378406	18.5923	0.440769	22.1492	0.210124	17.1562
3.32621	3.17895	0.107448	9.15931	0.280971	17.8995	0.380314	19.3085	0.442347	22.1683	0.21056	17.1731
3.30639	2.58947	0.109684	9.58699	0.282861	17.9028	0.387373	20.5175	0.444557	22.342	0.211052	17.1938
3.29152	2.14737	0.11054	9.62069	0.285278	17.9832	0.388073	19.8879	0.446567	22.3275	0.211696	17.2677
3.27169	1.5579	0.110324	9.38093	0.287345	18.0228	0.385059	18.9828	0.448522	22.424	0.212788	17.4504
3.25187	1.11579	0.109768	9.066	0.28979	18.2045	0.388308	19.9276	0.450455	22.4755	0.21442	17.6137
3.237	0.673684	0.10934	8.84568	0.292584	18.4259	0.394531	20.6365	0.452418	22.5622	0.215532	17.5204
3.22213	0.305263	0.109392	8.85605	0.295614	18.5844	0.393351	19.5239	0.454153	22.5965	0.215748	17.2095
3.2023	0.157895	0.110524	9.32227	0.297755	18.5712	0.390904	18.9987	0.456078	22.7017	0.21554	16.9816
		0.112576	9.95942	0.299329	18.4814	0.397267	20.5401	0.458167	22.7976	0.215688	17.0438
		0.115124	10.5293	0.30068	18.4444	0.402829	21.0178	0.460249	22.8571	0.216984	17.4854
		0.117392	10.896	0.303004	18.5521	0.401743	20.0908	0.462547	22.9787	0.218816	17.7809
		0.11914	11.172	0.305263	18.5211	0.400865	19.8741	0.464859	23.0329	0.220484	17.8768
		0.120732	11.3997	0.306818	18.3288	0.4053	20.8083	0.466945	23.0971	0.221256	17.7692
		0.121668	11.4075	0.30841	18.1953	0.40848	20.8301	0.469204	23.1624	0.221596	17.6331
		0.121796	11.2095	0.310243	18.1999	0.407663	19.9025	0.471608	23.2826	0.221716	17.5243
		0.12162	11.0606	0.312131	18.2429	0.406547	19.6105	0.474022	23.3241	0.22218	17.6215
		0.1221	11.2146	0.313896	18.332	0.412076	20.8466	0.476347	23.4218	0.2229	17.7705
		0.123912	11.5951	0.31511	18.1603	0.417024	21.0428	0.479141	23.5334	0.223928	17.8884
		0.126556	11.9355	0.315145	17.5604	0.415457	19.9526	0.481576	23.6047	0.224788	17.8949
		0.128368	11.8747	0.31389	16.5496	0.414129	19.7062	0.484178	23.6801	0.225648	17.939
		0.128196	11.3633	0.310951	15.3425	0.41862	20.7923	0.48672	23.7989	0.226988	18.0906
		0.126656	10.603	0.308	14.3515	0.423041	21.0566	0.489614	23.9113	0.228948	18.3018
		0.125388	10.1016	0.30769	14.5371	0.422541	20.3305	0.492259	24.0131	0.230484	18.3057
		0.12496	9.98885	0.310037	15.4898	0.422057	20.1785	0.49502	24.1056	0.231216	18.1217
		0.12502	10.0627	0.312786	16.3256	0.427076	21.313	0.497443	24.1644	0.231284	17.8768
		0.1254	10.2973	0.314294	16.5614	0.432635	21.6928	0.499959	24.2259	0.23148	17.8716
		0.126616	10.8673	0.313853	16.2232	0.431933	20.7276	0.502286	24.3059	0.232568	18.1939
		0.128336	11.5356	0.311124	15.1378	0.43028	20.2942	0.504818	24.3648	0.234268	18.4448
		0.12978	11.8694	0.30719	13.8785	0.435035	21.4325	0.507171	24.419	0.2359	18.5069
		0.13022	11.7543	0.304831	13.494	0.440516	21.7939	0.509878	24.5142	0.237052	18.4812
		0.12954	11.3025	0.305808	14.2393	0.43952	20.795	0.512373	24.5545	0.237824	18.4166
		0.12792	10.58	0.308876	15.3671	0.437961	20.4786	0.514751	24.5823	0.23822	18.2978
		0.125888	9.79766	0.311596	16.1103	0.443869	21.8138	0.517261	24.6609	0.238612	18.2992
		0.124	9.15014	0.312471	16.1367	0.449086	22.0437	0.519798	24.7263	0.239452	18.4776
		0.122268	8.63962	0.310812	15.3294	0.446931	20.8228	0.522176	24.7355	0.241012	18.678
		0.12096	8.30914	0.3074	14.0952	0.445751	20.5487	0.524457	24.7963	0.242736	18.7466
		0.120296	8.20286	0.304198	13.1735	0.450992	21.6863	0.526951	24.8471	0.243652	18.5772
		0.120032	8.18616	0.303592	13.3492	0.455282	21.8132	0.529129	24.8663	0.243984	18.4464
		0.11922	7.97021	0.305849	14.3409	0.45378	20.8334	0.53141	24.9191	0.244712	18.6145
		0.117684	7.57282	0.309324	15.5004	0.453955	20.8724	0.533798	24.9666	0.246204	18.8048
		0.115628	7.11154	0.312141	16.2403	0.460602	22.3046	0.536124	24.9889	0.247592	18.8411
		0.113532	6.70334	0.312876	16.138	0.465071	22.2696	0.538233	25.0101	0.248416	18.7763
		0.111708	6.40963	0.310753	15.1655	0.462049	20.9918	0.540367	25.0536	0.249192	18.8191
		0.110584	6.31003	0.307455	13.9921	0.462808	21.4133	0.542359	25.0562	0.250324	18.9577
		0.110124	6.33715	0.304855	13.2739	0.470886	22.8925	0.544363	25.1176	0.25152	18.9616
		0.109776	6.31776	0.304884	13.6023	0.473139	22.4248	0.546359	25.1487	0.252388	18.8605
		0.108668	6.07066	0.307659	14.6898	0.469943	21.3684	0.548498	25.2035	0.252768	18.74
		0.106712	5.71435	0.311559	15.9287	0.472404	22.1282	0.550361	25.162	0.25342	18.8281
		0.104516	5.40461	0.31478	16.7327	0.478892	23.0544	0.5522	25.1818	0.255048	19.1236
		0.103052	5.31389	0.315761	16.588	0.479324	22.3575	0.554065	25.2445	0.25696	19.2325
		0.10262	5.41368	0.313716	15.601	0.477037	21.5448	0.55601	25.2828	0.258316	19.1599
		0.102732	5.56142	0.310722	14.5293	0.48	22.2994	0.557676	25.2914	0.25888	19.0679
		0.102672	5.58216	0.308914	14.0853	0.486269	23.0875	0.559569	25.3752	0.259396	19.0342
		0.102396	5.5044	0.309518	14.5055	0.486539	22.3053	0.561392	25.3964	0.2598	18.9668
		0.101876	5.37091	0.312404	15.589	0.484404	21.5621	0.563155	25.4129	0.260532	19.0342
		0.10062	5.09496	0.316182	16.6725	0.486314	22.0734	0.564902	25.3879	0.262032	19.296
		0.09878	4.77792	0.31851	17.0213	0.491565	22.88	0.566853	25.4646	0.26376	19.3478
		0.097008	4.61246	0.318078	16.383	0.492984	22.7169	0.568835	25.4851	0.264712	19.1301
		0.096156	4.66786	0.315733	15.3073	0.493551	22.4632	0.57109	25.5737	0.264792	18.8839
		0.096292	4.88899	0.313157	14.389	0.495041	22.5867	0.573259	25.5637	0.26506	18.9046
		0.09706	5.2465	0.312584	14.3665	0.498071	23.0393	0.575624	25.6973	0.266056	19.2092
		0.09826	5.72602	0.314839	15.2346	0.500333	23.0374	0.577829	25.7098	0.26754	19.3841
		0.099344	6.1379	0.318386	16.2746	0.500027	22.3469	0.580229	25.8136	0.268892	19.4282
		0.099752	6.25066	0.321149	16.8112	0.499206	22.1362	0.582314	25.8269	0.26978	19.4217
		0.099228	5.97874	0.322239	16.6672	0.503559	23.1701	0.584637	25.9637	0.270688	19.4269
		0.098144	5.48496	0.320971	15.7455	0.50858	23.5566	0.587122	25.9948	0.2713	19.2921
		0.096832	4.96296	0.318196	14.5867	0.5076	22.5537	0.589969	26.1323	0.271608	19.2105
		0.095716	4.63296	0.316098	13.9392	0.506208	22.1494	0.592745	26.2162	0.272392	19.3971
		0.095132	4.56187	0.316543	14.372	0.510282	23.0961	0.595784	26.3423	0.273744	19.5876
		0.09586	4.97352	0.319494	15.4719	0.514998	23.4225	0.598741	26.4195	0.274988	19.5928
		0.098188	5.91869	0.323531	16.6275	0.514667	22.5637	0.601531	26.5007	0.275804	19.5435
		0.101476	7.06502	0.326729	17.2585	0.513716	22.1997	0.604086	26.5805	0.276524	19.55
		0.10508	8.10883	0.328071	17.1177	0.517633	23.1101	0.606747	26.5976	0.277156	19.515
		0.107832	8.72136	0.3269	16.1828	0.522651	23.6142	0.609114	26.6353	0.277968	19.5656
		0.109128	8.87938	0.324288	15.0253	0.523131	23.1002	0.611804	26.6882	0.278972	19.6446
		0.109124	8.73422	0.322529	14.5542	0.522392	22.7024	0.614369	26.7727	0.280072	19.7146
		0.109036	8.61758	0.323865	15.1482	0.524947	23.2567	0.617239	26.7992	0.281056	19.7366
		0.109528	8.75107	0.327224	16.1644	0.530088	23.8447	0.619712	26.8408	0.282012	19.747
		0.11098	9.16306	0.330655	16.9315	0.530769	23.2646	0.622555	26.9082	0.283036	19.7833
		0.11314	9.65506	0.332776	17.131	0.528894	22.5233	0.625308	27.022	0.284032	19.7677
		0.114984	9.92414	0.332678	16.4988	0.531367	23.2224	0.628212	27.0729	0.284808	19.7055
		0.115788	9.88166	0.330063	15.2811	0.53802	24.2114	0.630727	27.1634	0.285192	19.6265
		0.115828	9.69941	0.327206	14.3291	0.538967	23.7443	0.633673	27.3174	0.285512	19.5552
		0.115812	9.61162	0.326716	14.4698	0.537704	23.071	0.636378	27.3994	0.285992	19.5928
		0.116032	9.64915	0.328986	15.4489	0.539265	23.4047	0.638914	27.4391	0.287068	19.8258
		0.116768	9.87418	0.332559	16.6057	0.544286	24.169	0.641502	27.5382	0.289092	20.0159
		0.118088	10.1835	0.336004	17.5347	0.545584	23.9377	0.643931	27.5614	0.290652	19.9693
		0.119144	10.296	0.337437	17.5902	0.544463	23.2229	0.646359	27.6202	0.291248	19.8026
		0.11908	10.0384	0.335731	16.6691	0.545351	23.5044	0.648386	27.5858	0.291504	19.7081
		0.118492	9.66691	0.332578	15.4964	0.551229	24.65	0.650514	27.6453	0.29168	19.6019
		0.118084	9.42499	0.329978	14.8285	0.552706	24.1235	0.652455	27.6162	0.291864	19.5617
		0.118028	9.37315	0.329316	14.9197	0.549367	22.8874	0.654608	27.6883	0.292388	19.7028
		0.118296	9.47424	0.331306	15.8697	0.550773	23.4761	0.656545	27.6968	0.293612	19.9706
		0.11854	9.57403	0.335231	17.1409	0.558012	24.6976	0.658692	27.7649	0.294964	20.0521
		0.118632	9.57144	0.338241	17.8227	0.559104	23.9603	0.660482	27.7564	0.295728	19.8775
		0.118576	9.51442	0.338706	17.4633	0.556651	23.151	0.662208	27.8013	0.29592	19.6965
		0.11854	9.45221	0.336433	16.3764	0.561194	24.3105	0.663886	27.8125	0.296296	19.7625
		0.118504	9.41203	0.332855	15.0696	0.567122	24.8892	0.665284	27.7901	0.297328	19.9525
		0.118304	9.28114	0.328898	13.834	0.565871	23.7159	0.66681	27.8323	0.298404	20.0043
		0.117704	9.0025	0.326682	13.5103	0.564157	23.2667	0.66838	27.8501	0.298932	19.8362
		0.116296	8.42486	0.32748	14.2384	0.57059	24.7373	0.669837	27.8363	0.299168	19.7922
		0.113936	7.59072	0.330559	15.4362	0.57421	24.6514	0.671365	27.8758	0.300296	20.0717
		0.111108	6.75941	0.333982	16.4815	0.571265	23.4186	0.672759	27.8467	0.301896	20.241
		0.108752	6.19742	0.335357	16.6771	0.572124	23.8665	0.673957	27.848	0.302904	20.0522
		0.107108	5.88413	0.334127	16.0495	0.579741	25.1363	0.675212	27.8916	0.30276	19.6289
		0.105708	5.64048	0.331298	14.9581	0.578708	23.8916	0.676402	27.848	0.302612	19.4697
		0.1044	5.43312	0.328324	14.09	0.576037	23.2454	0.677429	27.8487	0.303056	19.6833
		0.103716	5.39035	0.327561	14.1349	0.582529	24.8238	0.678759	27.8969	0.3045	20.0988
		0.10328	5.3761	0.329359	14.9271	0.58839	25.4924	0.680086	27.9352	0.306104	20.32
		0.102344	5.19466	0.330461	15.1794	0.58809	24.7723	0.681306	27.8976	0.307336	20.3238
		0.100636	4.84766	0.329598	14.954	0.588357	24.6778	0.68258	27.9828	0.307828	20.1854
		0.09854	4.48267	0.327945	14.506	0.59228	25.3695	0.683967	28.0263	0.307892	19.9293
		0.096672	4.19146	0.326394	14.2404	0.594347	25.2863	0.685324	28.1101	0.30786	19.7924
		0.095212	4.00354	0.3256	14.2166	0.594104	24.5483	0.686586	28.1148	0.3084	19.9592
		0.093784	3.85709	0.325273	14.2754	0.592676	24.0857	0.688014	28.2092	0.309528	20.2166
		0.092456	3.78062	0.324392	14.1697	0.596731	25.1058	0.6894	28.2164	0.31076	20.3783
		0.091776	3.84672	0.323124	13.9577	0.601106	25.384	0.690965	28.2897	0.311608	20.3472
		0.091644	3.97114	0.3217	13.7562	0.599639	24.311	0.692496	28.3115	0.312088	20.2551
		0.09158	4.0139	0.32062	13.6941	0.598308	23.9959	0.69431	28.406	0.312132	20.0508
		0.091332	3.97762	0.319927	13.7093	0.604059	25.3728	0.695808	28.3637	0.312312	20.0353
		0.090632	3.81821	0.319129	13.6412	0.608196	25.4997	0.697716	28.482	0.31336	20.315
		0.089256	3.55901	0.318278	13.5659	0.606124	24.4042	0.699292	28.4854	0.315136	20.5441
		0.087512	3.31666	0.317512	13.5097	0.606522	24.6626	0.701104	28.57	0.316392	20.4186
		0.0858	3.1715	0.316845	13.5058	0.613371	26.0777	0.702927	28.6354	0.316396	20.0575
		0.084396	3.1093	0.316771	13.6631	0.615469	25.6899	0.705186	28.8086	0.316184	19.8234
		0.08366	3.1728	0.316518	13.6756	0.612904	24.6309	0.707288	28.8562	0.316332	19.8932
		0.083576	3.35813	0.315312	13.3664	0.615173	25.4389	0.709745	28.9878	0.316976	20.1714
		0.084104	3.6912	0.313796	13.0585	0.622143	26.5284	0.712069	29.0466	0.318332	20.548
		0.085016	4.13962	0.313433	13.0915	0.621669	25.497	0.714449	29.1279	0.320252	20.7502
		0.085912	4.54867	0.313547	13.2515	0.619333	24.7835	0.71681	29.2139	0.321604	20.6362
		0.086432	4.76203	0.313757	13.3598	0.62422	26.1002	0.719133	29.2582	0.32178	20.2504
		0.086492	4.79549	0.313602	13.2799	0.629569	26.597	0.721394	29.3314	0.32164	20.0573
		0.086316	4.74365	0.312894	13.0639	0.627963	25.4164	0.723904	29.4312	0.322044	20.2463
		0.086144	4.71398	0.312667	13.0579	0.627427	25.316	0.726204	29.4536	0.322896	20.5273
		0.085976	4.67818	0.313404	13.3902	0.633039	26.5819	0.728714	29.544	0.324	20.7541
		0.08582	4.64755	0.314624	13.6882	0.636165	26.4768	0.731229	29.6067	0.325232	20.8176
		0.085668	4.62168	0.314878	13.675	0.634086	25.3219	0.733657	29.6549	0.326196	20.7839
		0.085612	4.63694	0.313949	13.2865	0.634614	25.5135	0.73621	29.7228	0.326532	20.5817
		0.08588	4.79981	0.314002	13.3214	0.640576	26.7728	0.738849	29.7974	0.3267	20.5053
		0.086928	5.2439	0.314973	13.6267	0.642912	26.4874	0.741261	29.806	0.327552	20.7372
		0.088768	5.92915	0.315661	13.7562	0.640965	25.4838	0.743859	29.9209	0.329032	20.955
		0.091236	6.71794	0.316249	13.8664	0.641769	25.7983	0.746251	29.9394	0.330064	20.8383
		0.093856	7.41221	0.317351	14.1577	0.647922	27.008	0.748478	29.9824	0.330236	20.5947
		0.095948	7.86946	0.317843	14.2344	0.649306	26.3908	0.75061	30.0055	0.330432	20.5752
		0.097116	8.04014	0.318812	14.4458	0.646671	25.3998	0.752812	30.0835	0.331296	20.8513
		0.097472	8.00909	0.320214	14.7101	0.647878	25.7943	0.755	30.0782	0.332372	20.9757
		0.097236	7.84493	0.321176	14.8259	0.653684	26.8639	0.757169	30.1331	0.333252	20.9744
		0.097008	7.74398	0.321776	14.8041	0.653902	26.0407	0.759357	30.145	0.33388	20.9744
		0.097152	7.79712	0.322514	14.89	0.651573	25.3688	0.761518	30.1854	0.33464	21.0457
		0.098088	8.10379	0.323522	15.0664	0.654469	26.2779	0.763516	30.1655	0.335556	21.1144
		0.099992	8.58413	0.32479	15.2613	0.660749	27.3495	0.765457	30.2297	0.336376	21.1377
		0.102364	9.02712	0.325688	15.291	0.660169	26.3797	0.767371	30.2436	0.337176	21.1662
		0.104252	9.23189	0.3259	15.1305	0.658306	25.8908	0.769306	30.2918	0.33796	21.1857
		0.105064	9.17486	0.326441	15.1404	0.662063	26.9168	0.771278	30.3275	0.338708	21.2077
		0.104916	8.92862	0.327255	15.262	0.6668	27.3331	0.773043	30.346	0.339476	21.231
		0.104188	8.55163	0.328161	15.4106	0.664831	26.1056	0.774914	30.3659	0.340232	21.2505
		0.103452	8.21885	0.328663	15.412	0.663729	25.9457	0.776924	30.4221	0.34098	21.2634
		0.103344	8.15794	0.328845	15.3274	0.669959	27.3932	0.778784	30.4267	0.341688	21.2764
		0.10442	8.59042	0.329186	15.3162	0.672731	27.0734	0.78038	30.3884	0.342352	21.2945
		0.106444	9.22253	0.329516	15.3505	0.668982	25.797	0.782133	30.4307	0.343016	21.3088
		0.108628	9.70546	0.330033	15.4272	0.671159	26.6459	0.783941	30.473	0.343652	21.323
		0.109924	9.76766	0.330488	15.4562	0.677688	27.7836	0.785631	30.4604	0.34432	21.3386
		0.109936	9.51154	0.330006	15.1332	0.676027	26.5759	0.787278	30.518	0.345008	21.358
		0.108836	8.91706	0.329053	14.8444	0.673869	26.2138	0.789033	30.5907	0.345688	21.3762
		0.107144	8.16974	0.329288	14.9448	0.679973	27.7511	0.790724	30.6343	0.346384	21.3969
		0.104776	7.27742	0.330671	15.3776	0.683527	27.9666	0.792257	30.6317	0.347032	21.4112
		0.102156	6.46286	0.331473	15.4569	0.68148	26.8587	0.793661	30.6595	0.347664	21.4267
		0.100068	5.91125	0.330908	15.11	0.681124	26.856	0.795139	30.6667	0.348296	21.4449
		0.099064	5.71435	0.329353	14.5781	0.68602	27.8874	0.79672	30.7315	0.34892	21.4578
		0.099052	5.79082	0.328659	14.3997	0.687073	27.4058	0.798418	30.7334	0.34954	21.4708
		0.099364	5.93078	0.328667	14.4948	0.68378	26.1743	0.800173	30.8107	0.350164	21.4863
		0.099588	5.98133	0.328496	14.4624	0.685204	26.8706	0.802178	30.8589	0.350808	21.5045
		0.099552	5.92301	0.327857	14.3157	0.691894	28.1886	0.804022	30.9157	0.351464	21.5174
		0.09932	5.79082	0.327492	14.2847	0.693488	27.7889	0.806171	30.9599	0.352108	21.5317
		0.098476	5.51477	0.326857	14.175	0.691498	26.9776	0.808206	31.0781	0.352736	21.5447
		0.097188	5.17003	0.32639	14.1367	0.693406	27.4453	0.810447	31.1019	0.353344	21.5666
		0.095948	4.93286	0.326082	14.1063	0.698251	28.0367	0.812516	31.1791	0.353924	21.5874
		0.095352	4.86806	0.325492	13.9967	0.698451	27.2234	0.814808	31.2708	0.354512	21.608
		0.095156	4.86038	0.324143	13.6531	0.696004	26.2832	0.817027	31.3838	0.355148	21.6272
		0.094504	4.70146	0.323094	13.4932	0.697867	26.9095	0.819049	31.4175	0.355796	21.6463
		0.093372	4.46866	0.322439	13.5064	0.704353	27.9745	0.821114	31.5635	0.356448	21.6565
		0.092232	4.27829	0.322008	13.4913	0.704431	27.1903	0.823222	31.6316	0.357092	21.6732
		0.091088	4.09555	0.321169	13.3604	0.702602	26.6353	0.825494	31.703	0.357712	21.6938
		0.089864	3.89467	0.320204	13.2183	0.706008	27.5755	0.827553	31.7354	0.35832	21.7145
		0.0891	3.83117	0.319482	13.1575	0.711953	28.3802	0.830033	31.8452	0.358924	21.7288
		0.08894	3.89338	0.318655	13.0082	0.711714	27.5451	0.832302	31.8961	0.359532	21.7392
		0.089044	3.99706	0.317594	12.8648	0.709796	26.9775	0.834702	31.9939	0.360112	21.7573
		0.089136	4.0476	0.31709	12.8125	0.713829	28.0637	0.836863	32.0554	0.360736	21.7716
		0.089096	4.02168	0.316547	12.7307	0.718722	28.6213	0.839261	32.1606	0.36138	21.7949
		0.088648	3.86486	0.316027	12.6752	0.718702	27.9356	0.841557	32.2266	0.362032	21.8104
		0.087664	3.61862	0.316047	12.8404	0.717218	27.4064	0.843751	32.2531	0.362628	21.8234
		0.0865	3.38794	0.316251	12.9428	0.72108	28.3802	0.84621	32.3515	0.36324	21.8428
		0.085764	3.31536	0.315696	12.8245	0.725388	28.6571	0.848484	32.3799	0.36382	21.8558
		0.08558	3.35813	0.31472	12.5807	0.723694	27.4381	0.850859	32.4485	0.364404	21.8726
		0.08582	3.52661	0.314235	12.5563	0.722686	27.306	0.853	32.4908	0.364988	21.8869
		0.086452	3.83506	0.314418	12.7413	0.73012	28.9246	0.855398	32.5719	0.365588	21.9167
		0.087604	4.32202	0.314747	12.8919	0.733271	28.548	0.857633	32.6221	0.366208	21.9271
		0.088876	4.82827	0.314614	12.8899	0.730024	27.3086	0.859888	32.7046	0.366844	21.9465
		0.090092	5.2776	0.313914	12.6758	0.733578	28.4093	0.86192	32.7653	0.367468	21.9608
		0.091204	5.67288	0.3138	12.6706	0.739631	29.0065	0.864049	32.8194	0.368072	21.9828
		0.092156	5.98392	0.314053	12.8173	0.736792	27.5702	0.86612	32.8669	0.368628	21.9984
		0.0931	6.29194	0.315108	13.1199	0.738012	28.0842	0.867951	32.8801	0.369196	22.0087
		0.094316	6.666	0.315949	13.3255	0.745316	29.5033	0.869914	32.9251	0.369764	22.023
		0.095892	7.10635	0.31612	13.2706	0.746733	28.7568	0.871641	32.9047	0.370348	22.0372
		0.097352	7.45627	0.316073	13.27	0.744333	27.9798	0.873294	32.9205	0.370936	22.0606
		0.09842	7.66882	0.316973	13.5284	0.750527	29.4616	0.874722	32.9053	0.371548	22.0813
		0.099104	7.80221	0.318398	13.9116	0.754684	29.6215	0.876173	32.9132	0.372188	22.1046
		0.100156	8.0376	0.319498	14.0958	0.753463	28.5168	0.877673	32.9483	0.372816	22.1176
		0.101976	8.40778	0.320714	14.3515	0.753584	28.4977	0.879182	32.9469	0.373396	22.137
		0.103432	8.61758	0.321916	14.5629	0.76018	29.7643	0.880524	32.9542	0.373956	22.1539
		0.10474	8.83272	0.322904	14.6428	0.761292	29.0263	0.882014	32.9925	0.374532	22.1629
		0.106664	9.18134	0.323659	14.6468	0.758892	27.9566	0.8833	32.9522	0.375092	22.1785
		0.108816	9.4885	0.324822	14.7823	0.761684	28.8426	0.884645	32.9509	0.37572	22.194
		0.10978	9.51701	0.325867	14.8689	0.76822	29.7742	0.886014	32.9655	0.376352	22.2161
		0.109816	9.43277	0.326843	14.9971	0.766114	28.3808	0.887508	32.9919	0.37696	22.2329
		0.110452	9.62285	0.328035	15.1795	0.764961	28.2242	0.888906	32.9536	0.377564	22.2485
		0.11194	9.97877	0.329059	15.2786	0.771604	29.7571	0.890612	33.0401	0.378176	22.2601
		0.113648	10.2429	0.329633	15.2931	0.775276	29.7934	0.892102	33.0474	0.378756	22.2796
		0.114496	10.2364	0.330408	15.3757	0.773371	28.7238	0.8939	33.1598	0.379328	22.2977
		0.114652	10.1599	0.331661	15.4998	0.774502	28.9484	0.895829	33.1869	0.379896	22.3198
		0.115516	10.3621	0.332314	15.4139	0.780184	29.9163	0.897324	33.0774	0.3805	22.334
		0.117284	10.6835	0.332251	15.2348	0.781167	29.4036	0.898218	32.7946	0.381148	22.3457
		0.1188	10.8105	0.333002	15.3788	0.779292	28.4529	0.898765	32.4834	0.381792	22.356
		0.119248	10.7418	0.334369	15.651	0.780669	28.9002	0.899139	32.2839	0.382416	22.3755
		0.119896	10.8507	0.334847	15.62	0.787178	30.1171	0.8988	31.9165	0.38302	22.3962
		0.121288	11.0853	0.335137	15.5744	0.787433	29.2741	0.89861	31.6891	0.383624	22.4079
		0.122208	11.071	0.335971	15.69	0.785118	28.4575	0.899086	31.845	0.384204	22.4221
		0.121556	10.5385	0.336335	15.6398	0.789204	29.6467	0.899463	31.8536	0.384768	22.439
		0.119932	9.79642	0.336059	15.4575	0.7951	30.4164	0.899284	31.5326	0.385368	22.4675
		0.118228	9.1476	0.336043	15.4516	0.792892	29.0475	0.89982	31.6788	0.385992	22.4831
		0.117332	8.89622	0.336486	15.626	0.791757	28.9338	0.900533	31.8558	0.386616	22.496
		0.117232	8.95325	0.337414	15.8268	0.798312	30.3893	0.900678	31.7052	0.387264	22.5168
		0.117652	9.2111	0.337512	15.6721	0.800453	29.9863	0.901153	31.7885	0.387884	22.5271
		0.11846	9.62146	0.33618	15.0748	0.797237	28.7489	0.901871	32.0058	0.388464	22.5479
		0.119244	9.97608	0.335349	14.8752	0.798731	29.3685	0.902118	31.8994	0.389016	22.5673
		0.11926	9.95146	0.336071	15.2367	0.804861	30.4164	0.902439	31.8842	0.389588	22.588
		0.11838	9.51907	0.336924	15.4785	0.803753	29.3276	0.902957	31.9086	0.390188	22.6114
		0.116892	8.87933	0.336494	15.3339	0.801347	28.7079	0.903241	31.8035	0.390784	22.6308
		0.115152	8.22408	0.335147	14.8787	0.806186	30.0709	0.903998	31.8999	0.391412	22.6476
		0.113372	7.6621	0.333596	14.51	0.811212	30.6655	0.904747	31.9198	0.392056	22.6606
		0.111592	7.18152	0.333273	14.4942	0.809463	29.5192	0.905422	31.9085	0.392736	22.6723
		0.109872	6.77587	0.334237	14.9045	0.809165	29.5839	0.906114	31.9178	0.39336	22.6813
		0.108356	6.45485	0.33551	15.1728	0.815933	30.8947	0.907284	32.1305	0.393976	22.6969
		0.107044	6.21427	0.335094	14.9613	0.814482	29.5958	0.908092	31.9832	0.394572	22.7189
		0.10626	6.13037	0.333078	14.214	0.811288	28.8063	0.908676	31.795	0.395196	22.7319
		0.106064	6.1835	0.331604	13.9305	0.81499	30.0054	0.909504	31.7626	0.395828	22.7487
		0.106036	6.20424	0.331465	14.0917	0.817765	30.0325	0.910637	31.8663	0.396492	22.7643
		0.105404	6.02798	0.331371	14.1307	0.812408	28.5804	0.910982	31.5808	0.397112	22.7902
		0.104064	5.7325	0.330612	13.9993	0.812982	29.2694	0.911773	31.7565	0.397776	22.8006
		0.102512	5.45774	0.329486	13.743	0.81668	29.9757	0.913112	32.067	0.39842	22.82
		0.101724	5.40461	0.328312	13.5369	0.8141	28.8969	0.913635	31.8819	0.399024	22.842
		0.1016	5.47978	0.3278	13.572	0.81088	28.402	0.914273	31.8924	0.399608	22.8589
		0.101572	5.51736	0.328682	14.0028	0.813406	29.393	0.915327	32.0821	0.400212	22.877
		0.101288	5.42405	0.329959	14.2822	0.816131	29.6837	0.915931	32.03	0.400868	22.8926
		0.100488	5.22058	0.329978	14.144	0.811724	28.2857	0.916655	32.1463	0.401552	22.9068
		0.09966	5.07154	0.328735	13.6716	0.809759	28.2711	0.91758	32.266	0.402188	22.9172
		0.099288	5.07413	0.328473	13.6385	0.814143	29.5541	0.918057	32.1452	0.40286	22.9354
		0.099348	5.14282	0.329114	13.9134	0.814678	29.0923	0.918851	32.2416	0.403524	22.9587
		0.099484	5.20762	0.329459	13.9927	0.809729	27.8126	0.919243	32.0757	0.404156	22.9781
		0.099628	5.2465	0.32949	13.9669	0.810671	28.5823	0.919394	31.8662	0.404776	22.9937
		0.099776	5.29963	0.329267	13.8626	0.814771	29.4379	0.919716	31.8827	0.405396	23.0092
		0.100112	5.42794	0.329304	13.8658	0.812329	28.3669	0.920041	31.892	0.405992	23.0287
		0.100924	5.74546	0.330249	14.2179	0.808551	27.7981	0.920188	31.7942	0.4066	23.0429
		0.102132	6.20765	0.332153	14.726	0.812149	29.1042	0.920188	31.6423	0.407212	23.0611
		0.1033	6.60634	0.333357	14.9085	0.814782	29.3474	0.920006	31.4026	0.407808	23.0753
		0.10392	6.77198	0.33309	14.5755	0.810627	28.0763	0.919955	31.2578	0.408436	23.0896
		0.104232	6.83938	0.332857	14.4295	0.808704	28.0981	0.919492	30.8832	0.409068	23.109
		0.105076	7.11542	0.33391	14.6429	0.812818	29.2483	0.919204	30.7392	0.409724	23.1298
		0.106548	7.59744	0.335486	15.0255	0.812818	28.8103	0.919288	30.8138	0.410344	23.1388
		0.108476	8.15942	0.336808	15.2216	0.80819	27.6601	0.919055	30.6882	0.410976	23.1479
		0.110464	8.67086	0.338292	15.4958	0.808814	28.3062	0.91842	30.3506	0.411628	23.1647
		0.112452	9.11654	0.339967	15.8089	0.813151	29.2641	0.91798	30.1545	0.4123	23.1879
		0.11398	9.38093	0.341322	15.947	0.811018	28.3048	0.917069	29.7039	0.41298	23.2034
		0.114776	9.41333	0.342404	15.9562	0.807276	27.7029	0.916065	29.246	0.413676	23.2213
		0.114984	9.33168	0.343649	16.0441	0.811265	29.0652	0.915455	29.0538	0.414352	23.2314
		0.115436	9.43267	0.344349	15.9041	0.814016	29.3414	0.914684	28.7644	0.415044	23.2557
		0.116332	9.65256	0.344439	15.7197	0.810118	28.0287	0.913967	28.5688	0.415704	23.2738
		0.1173	9.84922	0.345386	15.8294	0.808292	27.9349	0.913245	28.3547	0.41636	23.2957
		0.11878	10.1135	0.346598	15.9999	0.811861	28.9451	0.912424	28.1268	0.417036	23.3074
		0.12092	10.5384	0.347945	16.1677	0.812467	28.8566	0.91151	27.8619	0.417716	23.3294
		0.122792	10.8053	0.349365	16.3375	0.810335	28.108	0.910749	27.7013	0.418412	23.3541
		0.123656	10.8066	0.350641	16.4499	0.809888	28.2771	0.909898	27.4727	0.419108	23.3735
		0.123708	10.6718	0.351676	16.4307	0.814096	29.3474	0.908984	27.2506	0.419804	23.3942
		0.123804	10.6641	0.351706	16.1486	0.814943	29.0944	0.908655	27.376	0.420484	23.4111
		0.124888	10.962	0.351829	16.0839	0.811147	27.8887	0.908306	27.421	0.421148	23.4279
		0.12684	11.3736	0.353851	16.6765	0.811096	28.3445	0.907796	27.3456	0.42182	23.437
		0.128624	11.5134	0.355127	16.7809	0.816429	29.5628	0.907227	27.2465	0.422528	23.4513
		0.12896	11.2365	0.354445	16.4062	0.815324	28.7092	0.907206	27.4349	0.423244	23.4694
		0.128016	10.6809	0.354469	16.3785	0.811043	27.738	0.906429	27.1218	0.42396	23.485
		0.126932	10.2156	0.355112	16.4644	0.814639	29.0685	0.905641	26.8741	0.424664	23.5031
		0.126292	9.97589	0.354914	16.3091	0.818284	29.7286	0.905363	26.9548	0.42536	23.52
		0.126432	10.0912	0.355304	16.3931	0.816492	28.8149	0.905541	27.2408	0.426056	23.5329
		0.1271	10.4178	0.356169	16.5516	0.813947	28.4739	0.905202	27.1826	0.426756	23.5511
		0.1283	10.9399	0.356502	16.5325	0.818557	29.7887	0.905224	27.3412	0.427444	23.5679
		0.129484	11.3582	0.356382	16.4076	0.819778	29.537	0.90552	27.6193	0.428144	23.5835
		0.129828	11.3491	0.356427	16.366	0.815714	28.2315	0.905759	27.8275	0.428848	23.5977
		0.129108	10.9245	0.355967	16.1578	0.816471	28.949	0.905627	27.7998	0.429548	23.6159
		0.127696	10.2885	0.355155	15.9279	0.822047	30.1066	0.905896	28.0257	0.430256	23.6379
		0.12602	9.60725	0.354494	15.799	0.819802	28.8552	0.906249	28.2807	0.430932	23.656
		0.12424	8.98694	0.354027	15.7124	0.816045	28.1773	0.906739	28.5879	0.431624	23.6729
		0.12248	8.43643	0.353206	15.5129	0.820694	29.5813	0.907131	28.806	0.4323	23.6936
		0.121156	8.06626	0.352722	15.4826	0.822357	29.3712	0.908055	29.2777	0.43298	23.7118
		0.120104	7.82045	0.352586	15.552	0.818098	28.0993	0.908627	29.5029	0.433696	23.726
		0.119248	7.62605	0.3521	15.4542	0.818992	28.8538	0.909527	29.9034	0.434448	23.739
		0.118204	7.3824	0.351037	15.1682	0.824057	29.8977	0.910253	30.1167	0.435184	23.7571
		0.116644	7.02211	0.3495	14.7816	0.822763	28.9073	0.911006	30.3506	0.43592	23.7766
		0.11512	6.75125	0.348876	14.7533	0.818869	28.1092	0.911688	30.5059	0.436636	23.796
		0.114232	6.65664	0.348702	14.8319	0.823	29.4141	0.912582	30.7723	0.437356	23.8116
		0.113628	6.58166	0.348218	14.7618	0.826055	29.7166	0.913406	30.8772	0.438084	23.8323
		0.112168	6.28406	0.347	14.5575	0.824329	28.8221	0.913924	30.8528	0.438768	23.8414
		0.109904	5.86723	0.345722	14.3574	0.821976	28.4336	0.914576	30.9076	0.439448	23.8608
		0.10712	5.46422	0.344861	14.2979	0.824414	29.2132	0.915412	31.0575	0.44014	23.8802
		0.104372	5.148	0.345114	14.5866	0.8253	29.0778	0.91572	30.8798	0.44088	23.8932
		0.1022	4.9523	0.345461	14.7525	0.821759	27.8715	0.916124	30.9267	0.441628	23.9113
		0.101216	4.95619	0.3446	14.5927	0.820218	27.9706	0.917061	31.1924	0.442352	23.9321
		0.100824	5.02747	0.343663	14.4433	0.825908	29.3435	0.91729	31.02	0.443072	23.9437
		0.100744	5.12467	0.343655	14.4843	0.825537	28.4959	0.917627	31.02	0.4438	23.9619
		0.100576	5.12726	0.343563	14.4434	0.821308	27.5531	0.918553	31.2512	0.444508	23.9774
		0.100176	5.04048	0.343116	14.3694	0.825516	28.9523	0.918757	31.0114	0.445228	24.0008
		0.098928	4.77139	0.343122	14.3746	0.828378	29.0296	0.919006	30.9307	0.445936	24.0176
		0.097132	4.43621	0.342541	14.1506	0.823378	27.625	0.91969	31.0813	0.446672	24.0396
		0.095268	4.19405	0.341545	13.9953	0.824912	28.4793	0.919916	30.9631	0.447416	24.0591
		0.093896	4.07741	0.341941	14.3514	0.829151	29.0177	0.920159	30.938	0.448184	24.0798
		0.093192	4.12536	0.343794	14.8555	0.824659	27.4889	0.920429	30.9307	0.448948	24.0928
		0.09306	4.26662	0.3449	14.995	0.823169	27.5874	0.920837	30.9836	0.44966	24.1122
		0.09322	4.4364	0.344214	14.5061	0.828551	28.9074	0.921271	31.0338	0.450368	24.1265
		0.093664	4.67698	0.342486	13.9372	0.828351	28.1946	0.921435	30.8852	0.451052	24.1511
		0.09406	4.86182	0.342478	14.0238	0.824602	27.5068	0.921612	30.8126	0.451756	24.1602
		0.094112	4.87714	0.344424	14.7466	0.828763	28.8374	0.922004	30.8681	0.452492	24.1757
		0.093904	4.78382	0.346667	15.2494	0.830947	28.7918	0.922084	30.7406	0.453184	24.1926
		0.093688	4.68955	0.347731	15.3432	0.826427	27.4764	0.922092	30.6144	0.4539	24.2068
		0.093316	4.55784	0.347376	14.9138	0.827008	28.1304	0.922069	30.4809	0.454624	24.2185
		0.093008	4.46232	0.346606	14.6185	0.832139	29.2701	0.921784	30.1967	0.455364	24.2237
		0.09292	4.4688	0.34749	14.8808	0.830549	28.2752	0.921582	29.9708	0.45608	24.2418
		0.093028	4.54522	0.349441	15.416	0.826976	27.6918	0.921424	29.7858	0.456804	24.2703
		0.093264	4.64582	0.351165	15.6802	0.831341	29.0436	0.92118	29.5492	0.45752	24.2976
		0.093612	4.7892	0.35221	15.7139	0.832727	28.9082	0.920959	29.3465	0.458244	24.3235
		0.094284	5.04821	0.352365	15.5044	0.828582	27.6404	0.921037	29.3306	0.458928	24.3455
		0.095392	5.49274	0.353	15.5771	0.828441	28.153	0.921037	29.2652	0.459656	24.3624
		0.096712	6.01085	0.354694	15.9702	0.833578	29.3244	0.920608	28.9314	0.460384	24.3831
		0.098044	6.4873	0.356333	16.2246	0.831908	28.2943	0.920359	28.7445	0.461112	24.3999
		0.099476	6.93787	0.357369	16.288	0.827988	27.4863	0.920222	28.6189	0.461832	24.4077
		0.101116	7.4135	0.357859	16.1473	0.831627	28.7581	0.919778	28.3136	0.462532	24.4207
		0.10274	7.83312	0.358694	16.2088	0.834529	29.015	0.919645	28.2244	0.463248	24.4427
		0.104384	8.19941	0.359661	16.3072	0.829935	27.5854	0.919522	28.1247	0.463976	24.4531
		0.106128	8.5321	0.360527	16.3865	0.829502	28.0215	0.919431	28.0395	0.464708	24.4686
		0.107696	8.77051	0.361359	16.4269	0.834847	29.3031	0.919292	27.9418	0.46542	24.4842
		0.108384	8.7731	0.361873	16.3542	0.833396	28.3043	0.919608	28.1202	0.466116	24.4984
		0.108404	8.64221	0.362059	16.2756	0.829088	27.382	0.919722	28.1433	0.466828	24.5256
		0.108444	8.59426	0.362545	16.3159	0.833443	28.7806	0.920039	28.3038	0.467524	24.5451
		0.1087	8.65646	0.363402	16.4559	0.836565	29.0383	0.920369	28.4656	0.468232	24.5606
		0.109556	8.89234	0.364033	16.4915	0.832702	27.6879	0.920788	28.6558	0.468948	24.5697
		0.11104	9.21115	0.364029	16.2629	0.832541	28.1074	0.921169	28.8303	0.469668	24.5892
		0.112224	9.34205	0.363296	15.9582	0.838022	29.4003	0.921776	29.111	0.470376	24.6164
		0.1125	9.23318	0.363998	16.2589	0.837692	28.7535	0.922129	29.2274	0.471076	24.6319
		0.112484	9.12432	0.364808	16.4921	0.8336	27.8457	0.922759	29.5313	0.471784	24.6449
		0.112612	9.10877	0.364655	16.4155	0.837284	29.2113	0.923635	29.9219	0.472484	24.6643
		0.112824	9.14765	0.364306	16.2821	0.840559	29.6202	0.924222	30.1413	0.473176	24.6838
		0.113676	9.38592	0.36358	16.037	0.836143	28.2421	0.924918	30.3726	0.473856	24.7045
		0.11518	9.73795	0.362622	15.8111	0.834878	28.515	0.92572	30.6665	0.474548	24.7278
		0.116828	10.0044	0.362527	15.9333	0.840373	29.9261	0.926696	30.9282	0.47526	24.7486
		0.117616	9.97478	0.362427	15.9286	0.838792	28.9311	0.927135	30.8812	0.475992	24.7615
		0.11736	9.64349	0.361459	15.6498	0.834455	28.0637	0.927869	31.0041	0.476696	24.7771
		0.11614	8.99218	0.360124	15.3015	0.8385	29.4095	0.928545	31.0404	0.477396	24.7913
		0.11412	8.11142	0.359778	15.2982	0.841278	29.6295	0.929127	31.0464	0.478088	24.8055
		0.111724	7.24099	0.359069	15.1265	0.837333	28.3009	0.929724	31.1059	0.47876	24.8261
		0.10966	6.62328	0.357761	14.89	0.837084	28.8043	0.930273	31.1231	0.479484	24.8466
		0.108304	6.29587	0.35661	14.7863	0.842482	29.9645	0.9307	31.1079	0.480204	24.8568
		0.107476	6.12907	0.355818	14.7896	0.839498	28.6603	0.931269	31.2334	0.48088	24.8682
		0.10716	6.1213	0.35479	14.6633	0.836004	28.1086	0.932071	31.423	0.481556	24.8771
		0.107288	6.22752	0.353929	14.6026	0.840867	29.5436	0.932341	31.3027	0.48226	24.9029
		0.10744	6.28843	0.352869	14.4756	0.840871	28.8743	0.932957	31.4395	0.482944	24.9184
		0.10712	6.15494	0.3516	14.3157	0.836402	27.8959	0.933755	31.5697	0.483608	24.9353
		0.106004	5.81285	0.350537	14.2298	0.840918	29.3593	0.934339	31.4879	0.484224	24.956
		0.104292	5.39942	0.349694	14.2238	0.842182	29.0574	0.934449	31.2196	0.484896	24.9716
		0.102444	5.06246	0.34939	14.3573	0.837412	27.9705	0.935265	31.4568	0.485572	24.9936
		0.10074	4.79333	0.348994	14.3791	0.841014	29.2781	0.935845	31.439	0.486236	25.013
		0.099236	4.58126	0.347678	14.107	0.843263	29.3177	0.935584	31.0795	0.486892	25.0286
		0.098124	4.44288	0.345694	13.6934	0.83838	27.921	0.936084	31.3194	0.487548	25.0532
		0.097492	4.39752	0.344537	13.6095	0.840518	28.9748	0.936731	31.5123	0.488204	25.0662
		0.097276	4.42214	0.344253	13.8104	0.844588	29.4915	0.936533	31.2255	0.488896	25.083
		0.096984	4.38067	0.343851	13.8441	0.840002	28.03	0.937063	31.4687	0.4896	25.1064
		0.096068	4.16294	0.343035	13.7509	0.83912	28.3049	0.9377	31.6557	0.490288	25.1258
		0.094392	3.83246	0.341798	13.5091	0.844216	29.6117	0.937388	31.2923	0.490952	25.1413
		0.09242	3.54216	0.341118	13.4741	0.842496	28.6002	0.937512	31.3313	0.491596	25.1595
		0.090584	3.34776	0.341661	13.8652	0.838751	28.0208	0.937869	31.4535	0.492228	25.1815
		0.089092	3.23112	0.343504	14.4724	0.843353	29.434	0.937333	31.0543	0.492868	25.1984
		0.087928	3.15725	0.343857	14.4936	0.844084	29.0554	0.936967	30.8779	0.49352	25.2126
		0.087188	3.15595	0.342722	14.0033	0.839208	27.921	0.937255	31.1018	0.494148	25.2269
		0.08702	3.25704	0.342022	13.8573	0.842235	29.1327	0.936727	30.7933	0.494764	25.2398
		0.0871	3.38794	0.341984	13.8699	0.845145	29.3527	0.936106	30.4985	0.4954	25.2606
		0.087132	3.45533	0.342167	13.9254	0.840257	28.0717	0.936104	30.5997	0.49608	25.2826
		0.087048	3.46181	0.34248	14.0073	0.84279	29.1777	0.9359	30.5342	0.496748	25.2995
		0.086712	3.37368	0.342976	14.1572	0.845876	29.4644	0.935384	30.2825	0.497368	25.3176
		0.085732	3.14472	0.343363	14.2259	0.840569	27.9904	0.93519	30.2376	0.498	25.3357
		0.084172	2.84582	0.344039	14.4128	0.840637	28.6134	0.935018	30.1815	0.498616	25.3474
		0.082536	2.63098	0.345755	14.9407	0.845086	29.5204	0.934343	29.8247	0.49928	25.3681
		0.08158	2.6245	0.348067	15.3702	0.841335	28.18	0.933951	29.6887	0.499948	25.3837
		0.081632	2.89234	0.348569	15.1628	0.838445	27.9877	0.933467	29.472	0.500624	25.3941
		0.082512	3.38434	0.347767	14.7677	0.843353	29.2826	0.932822	29.1753	0.501272	25.407
		0.084296	4.12891	0.348133	14.8186	0.842649	28.5539	0.932339	28.9916	0.501904	25.4316
		0.086532	4.95139	0.349435	15.0869	0.83791	27.5484	0.931751	28.7472	0.50252	25.4563
		0.088252	5.55106	0.350033	15.0982	0.841337	28.8539	0.931278	28.5793	0.503112	25.4718
		0.08908	5.82062	0.350531	15.1325	0.844069	29.0104	0.930829	28.4128	0.503724	25.4848
		0.089248	5.86469	0.351373	15.2515	0.839071	27.6336	0.930216	28.1711	0.504356	25.5042
		0.089176	5.82192	0.352173	15.2852	0.83878	28.1886	0.929429	27.8757	0.505008	25.525
		0.08908	5.82322	0.35219	15.157	0.843524	29.1968	0.929288	27.9701	0.505656	25.5522
		0.089356	5.95925	0.353227	15.3393	0.839643	27.8193	0.928665	27.723	0.50632	25.5716
		0.090192	6.2711	0.354716	15.5798	0.838904	28.1649	0.928049	27.5016	0.506932	25.5936
		0.091552	6.68146	0.356098	15.8077	0.843914	29.3164	0.927616	27.3761	0.507552	25.6092
		0.092964	7.05192	0.357161	15.9041	0.841769	28.2818	0.927618	27.4831	0.508172	25.6196
		0.09456	7.4161	0.35741	15.6953	0.840394	28.2455	0.927445	27.4349	0.508788	25.6364
		0.09586	7.65845	0.357516	15.6054	0.844812	29.3309	0.927216	27.3503	0.509396	25.6584
		0.096808	7.81781	0.358878	15.9933	0.843057	28.2897	0.927067	27.3199	0.510004	25.6818
		0.098056	8.06486	0.359957	16.132	0.839978	27.8741	0.927414	27.5632	0.510664	25.6947
		0.100116	8.45448	0.359853	15.9582	0.845063	29.1168	0.927578	27.6233	0.511272	25.7025
		0.101756	8.65387	0.35959	15.8287	0.843143	28.038	0.927631	27.6168	0.511876	25.7232
		0.102704	8.75496	0.3598	15.8605	0.839461	27.3158	0.927865	27.7014	0.512492	25.7427
		0.103592	8.86901	0.36	15.867	0.843645	28.657	0.928427	27.9643	0.513092	25.7647
		0.104268	8.904	0.360022	15.803	0.846024	28.6636	0.928631	27.9748	0.513696	25.779
		0.104348	8.81458	0.359716	15.6286	0.841465	27.4163	0.928935	28.06	0.514304	25.7984
		0.104572	8.85734	0.359318	15.5077	0.844157	28.4641	0.929247	28.1418	0.514908	25.8192
		0.105836	9.14117	0.358886	15.3796	0.848516	29.1466	0.930173	28.5798	0.515832	25.8425
		0.107756	9.47554	0.358314	15.2237	0.845416	27.8491	0.931014	28.8706	0.51732	25.8865
		0.10894	9.49627	0.3578	15.0783	0.844069	27.8332	0.931963	29.2353	0.519344	25.9436
		0.108992	9.27854	0.357439	14.9832	0.849773	29.2344	0.933229	29.7005	0.521444	26.0071
		0.108428	8.98046	0.357227	14.931	0.8494	28.4918	0.934431	30.0844	0.523516	26.0654
		0.108084	8.82624	0.356173	14.6594	0.845824	27.7928	0.935447	30.3573	0.525584	26.1289
		0.1081	8.8392	0.3536	13.8599	0.850371	29.2165	0.936547	30.679	0.52776	26.1898
		0.108524	9.0349	0.35048	13.1563	0.85322	29.3989	0.937684	30.9638	0.530064	26.2559
		0.109468	9.37944	0.349422	13.3558	0.849092	28.1951	0.938055	30.8461	0.53218	26.3168
		0.110776	9.70819	0.351159	14.3151	0.851229	29.206	0.939108	31.1666	0.534212	26.3764
		0.111548	9.7367	0.353963	15.3346	0.856059	29.9281	0.93982	31.1964	0.536144	26.4369
		0.111524	9.55051	0.355373	15.6108	0.851912	28.5823	0.94019	31.0768	0.538184	26.4986
		0.111232	9.34982	0.353751	14.9501	0.8533	29.245	0.940904	31.2175	0.54032	26.5593
		0.110708	9.05693	0.350335	13.8804	0.858361	30.2188	0.941555	31.2922	0.542396	26.6215
		0.10962	8.54011	0.346684	12.9582	0.855363	28.8597	0.942014	31.2744	0.544312	26.6759
		0.10808	7.88352	0.344416	12.68	0.854049	28.8967	0.942494	31.3007	0.546136	26.729
		0.106644	7.34611	0.344827	13.2951	0.859353	30.1282	0.943127	31.4269	0.548008	26.777
		0.105408	6.94435	0.346884	14.0799	0.85741	29.1022	0.943488	31.4004	0.550092	26.8353
		0.104724	6.74218	0.347496	14.1619	0.854027	28.5466	0.944096	31.545	0.552388	26.9027
		0.10452	6.7033	0.345843	13.5903	0.859141	30.0477	0.944412	31.51	0.554616	26.961
		0.104596	6.72922	0.342531	12.5675	0.858694	29.3328	0.94489	31.5061	0.556744	27.0245
		0.104252	6.59338	0.339312	11.8916	0.854812	28.4608	0.944731	31.1223	0.558792	27.0803
		0.103012	6.19339	0.338833	12.2213	0.858108	29.5456	0.944504	30.7491	0.560892	27.1386
		0.101156	5.69491	0.341008	13.2487	0.858504	29.064	0.944671	30.6586	0.563184	27.1826
		0.099432	5.32944	0.34339	13.9319	0.85558	28.4278	0.944439	30.3368	0.565536	27.2436
		0.097976	5.05858	0.34378	13.9313	0.858965	29.4168	0.943929	30.0097	0.567952	27.3109
		0.096632	4.81013	0.341888	13.143	0.858696	28.922	0.944018	30.0633	0.57014	27.3706
		0.095456	4.62658	0.338024	11.9412	0.856876	28.7085	0.94392	29.976	0.571672	27.4146
		0.094836	4.57502	0.334871	11.3036	0.86098	29.8957	0.943098	29.4712	0.572644	27.438
		0.094792	4.65754	0.335367	11.9491	0.860229	29.1293	0.942382	29.1105	0.574004	27.4768
		0.095008	4.75814	0.338163	13.0115	0.856296	28.3643	0.94198	28.9479	0.576028	27.5235
		0.095136	4.80197	0.339745	13.4066	0.860796	29.7279	0.941037	28.4795	0.578504	27.5909
		0.095168	4.77605	0.339614	13.2732	0.861106	29.28	0.939955	28.0361	0.581112	27.6466
		0.094876	4.63906	0.337539	12.487	0.8564	28.1191	0.939308	27.8816	0.583712	27.7062
		0.093932	4.37126	0.334102	11.5614	0.858659	29.2198	0.938488	27.6048	0.586064	27.7736
		0.092476	4.06963	0.33229	11.4299	0.86209	29.8177	0.937431	27.2525	0.588296	27.828
		0.091432	3.96336	0.334267	12.4077	0.857386	28.3596	0.936863	27.191	0.590552	27.8864
		0.091108	4.03334	0.337188	13.3776	0.856741	28.7606	0.93622	27.0279	0.59264	27.9317
		0.091432	4.23811	0.338288	13.5771	0.861135	29.827	0.935253	26.7392	0.594256	27.9719
		0.092204	4.55011	0.337502	13.1389	0.857118	28.4898	0.934837	26.7874	0.59536	27.9861
		0.093432	5.02267	0.334986	12.1928	0.854476	28.3642	0.934155	26.6283	0.596112	27.9913
		0.09478	5.54069	0.332884	11.766	0.858539	29.4848	0.933131	26.3535	0.59678	27.9978
		0.095828	5.90746	0.333478	12.2008	0.854971	28.2771	0.932643	26.4063	0.597412	28.0068
		0.096296	6.03835	0.336673	13.3418	0.853218	28.291	0.931863	26.2371	0.598016	28.0159
		0.096368	6.02669	0.3395	14.0363	0.85529	28.7574	0.930749	25.9484	0.598588	28.0159
		0.09656	6.06422	0.340482	14.109	0.851927	27.6601	0.930076	25.9226	0.599152	28.0147
		0.097464	6.3709	0.338859	13.336	0.849508	27.5431	0.929545	25.8902	0.599688	28.0147
		0.098944	6.84346	0.336806	12.7988	0.852171	28.1688	0.928663	25.6754	0.600208	28.0082
		0.100664	7.34093	0.337118	12.9719	0.847859	26.8765	0.928131	25.6384	0.600724	28.0081
		0.102264	7.7257	0.339651	13.8711	0.847743	27.4269	0.927588	25.5683	0.601244	28.0068
		0.10348	7.9499	0.342631	14.5622	0.851004	28.1365	0.927335	25.6681	0.601756	28.0056
		0.103928	7.96286	0.344151	14.7089	0.846953	26.9003	0.92689	25.6311	0.602276	28.0133
		0.104036	7.93958	0.3431	14.0502	0.846373	27.3569	0.926829	25.7936	0.602784	28.0172
		0.104812	8.15424	0.341369	13.5528	0.849451	28.0142	0.926916	26.0176	0.60324	28.0184
		0.106584	8.57237	0.341469	13.6195	0.845651	26.8434	0.926702	26.0084	0.603728	28.0107
		0.108848	8.99342	0.343449	14.3819	0.844996	27.222	0.926286	25.8868	0.604208	28.0106
		0.110796	9.28373	0.346757	15.3082	0.848063	27.8266	0.92668	26.2608	0.604692	28.0107
		0.111824	9.32779	0.349208	15.6689	0.844049	26.5759	0.926702	26.3559	0.605164	28.0159
		0.111976	9.21634	0.348649	15.0273	0.843402	27.0132	0.926988	26.6189	0.605628	28.0172
		0.111876	9.13339	0.346141	14.1189	0.847635	28.0168	0.927712	27.1185	0.60612	28.0146
		0.112064	9.22282	0.345171	13.9254	0.843851	26.7727	0.928367	27.5361	0.6066	28.0108
		0.113096	9.53093	0.346471	14.4698	0.843384	27.2213	0.928561	27.6676	0.607048	28.0082
		0.11522	10.0022	0.349645	15.4569	0.847545	28.1291	0.929369	28.1282	0.607516	28.0133
		0.117976	10.445	0.352271	15.9293	0.844261	27.0225	0.929902	28.3779	0.607984	28.0146
		0.120288	10.6641	0.352976	15.7298	0.843329	27.2604	0.930673	28.728	0.60848	28.0145
		0.121156	10.5098	0.351382	14.8689	0.847539	28.182	0.931488	29.0861	0.60896	28.0133
		0.12034	9.98794	0.349622	14.2927	0.844771	27.1751	0.932394	29.4343	0.609412	28.0146
		0.11908	9.44021	0.349578	14.4176	0.84482	27.5438	0.933069	29.6701	0.609888	28.0133
		0.118512	9.26942	0.351739	15.3255	0.846808	27.7704	0.933833	29.8815	0.610348	28.0146
		0.119288	9.69662	0.354337	16.0363	0.84558	27.3489	0.934439	30.0341	0.61082	28.012
		0.12094	10.3727	0.355659	16.1618	0.846735	27.6991	0.93542	30.2713	0.611292	28.0146
		0.123068	10.9583	0.354753	15.5195	0.847276	27.6979	0.936094	30.3526	0.611776	28.0108
		0.125068	11.2473	0.35259	14.7128	0.84732	27.76	0.936914	30.5052	0.612236	28.0147
		0.12636	11.2719	0.351412	14.4346	0.850529	28.5191	0.937486	30.5442	0.612704	28.0095
		0.126452	11.0399	0.352463	14.9982	0.848618	27.7249	0.937971	30.5587	0.613156	28.0082
		0.125576	10.5915	0.354771	15.869	0.849008	28.1366	0.93842	30.6393	0.613596	28.0133
		0.124164	9.98928	0.356543	16.2636	0.85401	29.2405	0.938735	30.6135	0.61402	28.0198
		0.12272	9.42211	0.356392	15.9589	0.851086	27.9879	0.939094	30.636	0.614452	28.0185
		0.12202	9.21763	0.354392	15.0941	0.850288	28.1616	0.9395	30.6756	0.614932	28.0236
		0.121996	9.29798	0.351982	14.3158	0.855206	29.1315	0.9399	30.7007	0.615424	28.0466
		0.121984	9.36538	0.351227	14.2642	0.85172	27.8299	0.940588	30.8534	0.615924	28.0606
		0.1219	9.37574	0.352508	14.9117	0.851363	27.9944	0.941137	30.8739	0.616456	28.0734
		0.121696	9.31224	0.353831	15.2778	0.854835	28.6312	0.941086	30.591	0.616996	28.0874
		0.121416	9.21893	0.353802	15.1661	0.853006	27.9091	0.941694	30.747	0.617496	28.1042
		0.121048	9.0971	0.352531	14.6132	0.854049	28.3907	0.941992	30.6849	0.618008	28.1236
		0.120484	8.90659	0.350278	13.8381	0.857535	28.91	0.941561	30.3042	0.618572	28.1431
		0.11932	8.50891	0.348573	13.4946	0.854178	27.7631	0.941773	30.3664	0.619148	28.1612
		0.11768	7.9897	0.349494	14.1011	0.855969	28.6219	0.941853	30.3215	0.619728	28.1807
		0.116032	7.54306	0.351624	14.8456	0.859322	28.9701	0.941563	30.0487	0.620284	28.191
		0.114552	7.17893	0.352441	14.9963	0.854922	27.7003	0.941702	30.0646	0.620828	28.2053
		0.113296	6.91843	0.351208	14.5251	0.856798	28.5988	0.941829	30.0547	0.621408	28.2195
		0.112176	6.68909	0.348682	13.6702	0.861065	29.2985	0.941822	29.9508	0.621976	28.239
		0.11098	6.44333	0.345943	13.0194	0.857324	28.0241	0.941873	29.8776	0.622548	28.2519
		0.109344	6.13147	0.345249	13.1793	0.858594	28.7264	0.941876	29.7943	0.62312	28.2753
		0.10816	5.9904	0.347082	14.025	0.862527	29.356	0.941606	29.5333	0.623696	28.2908
		0.107604	5.97096	0.349133	14.5603	0.858441	28.0723	0.941265	29.2512	0.62428	28.3077
		0.107024	5.87506	0.349198	14.4401	0.85921	28.6266	0.940792	28.9129	0.62484	28.3271
		0.105692	5.62104	0.346994	13.6724	0.861031	28.7456	0.940365	28.6335	0.62542	28.3478
		0.104072	5.38128	0.344116	12.9641	0.856594	27.5221	0.940122	28.4624	0.626008	28.3647
		0.103176	5.34629	0.342571	12.855	0.857455	28.0334	0.939653	28.169	0.626596	28.3764
		0.103048	5.43182	0.343216	13.418	0.858082	27.8445	0.939171	27.9127	0.627176	28.3919
		0.10304	5.49144	0.344686	13.8956	0.854008	26.8931	0.93912	27.914	0.627732	28.4139
		0.102924	5.49533	0.345533	14.0278	0.856892	27.8418	0.939031	27.8565	0.628308	28.4295
		0.102768	5.44867	0.344422	13.4457	0.856955	27.518	0.938784	27.6939	0.628884	28.4489
		0.102272	5.30093	0.341943	12.5842	0.854302	27.0681	0.938802	27.6794	0.629476	28.4684
		0.101152	5.0508	0.340018	12.2498	0.857257	27.8371	0.938884	27.6582	0.630056	28.4891
		0.099532	4.77005	0.34061	12.7988	0.855704	27.1216	0.938857	27.5797	0.63064	28.5072
		0.098464	4.70664	0.342682	13.5573	0.852588	26.6955	0.938845	27.5003	0.631204	28.5254
		0.098296	4.84118	0.343906	13.8288	0.856639	27.8054	0.938476	27.24	0.631764	28.5435
		0.09894	5.15837	0.342837	13.4	0.854314	26.8071	0.938706	27.3787	0.63232	28.5643
		0.100028	5.59253	0.340606	12.658	0.851543	26.5289	0.938884	27.4455	0.632904	28.5798
		0.101448	6.14678	0.338851	12.3449	0.856039	27.7274	0.938745	27.3199	0.633484	28.5993
		0.102852	6.65952	0.339712	12.7341	0.853808	26.7707	0.939469	27.7389	0.634064	28.6135
		0.104108	7.06099	0.341673	13.3683	0.85119	26.558	0.940535	28.2694	0.634636	28.633
		0.10476	7.20744	0.343659	13.7793	0.854559	27.4142	0.941106	28.4657	0.635208	28.6537
		0.104896	7.1543	0.343757	13.6095	0.85282	26.7463	0.942224	29.0054	0.635772	28.6641
		0.104888	7.07395	0.342014	12.888	0.850782	26.6479	0.943237	29.4435	0.636316	28.6783
		0.104984	7.09728	0.340118	12.5504	0.853341	27.2497	0.944053	29.7508	0.63686	28.6991
		0.105244	7.17245	0.340608	12.9561	0.85029	26.2917	0.944788	30.0184	0.637412	28.7198
		0.105972	7.40702	0.343088	13.8851	0.850116	26.7595	0.945559	30.3013	0.637996	28.7315
		0.107312	7.8084	0.346202	14.66	0.852263	27.1797	0.946388	30.5992	0.638552	28.7574
		0.109356	8.35742	0.347443	14.7082	0.848582	26.1193	0.947357	30.8999	0.639104	28.7755
		0.111416	8.81328	0.346137	13.9933	0.849765	26.8943	0.94798	31.0068	0.63968	28.7911
		0.113128	9.11525	0.344576	13.5823	0.851124	26.9961	0.948694	31.1336	0.640268	28.7988
		0.113992	9.16838	0.344802	13.7435	0.847716	26.2502	0.949516	31.3285	0.640844	28.8105
		0.114208	9.06989	0.346947	14.4788	0.850133	27.0793	0.950196	31.3068	0.641388	28.8235
		0.114296	9.03749	0.35042	15.4217	0.849922	26.8765	0.950782	31.3187	0.641916	28.8429
		0.115076	9.25771	0.352659	15.6979	0.848606	26.7014	0.951873	31.4607	0.642488	28.8649
		0.116796	9.64344	0.351939	15.0776	0.850855	27.3145	0.952427	31.3015	0.64306	28.887
		0.118832	9.9877	0.350186	14.4829	0.849486	26.7682	0.952786	31.0986	0.643612	28.9051
		0.119784	9.99922	0.349694	14.407	0.849147	27.074	0.953541	31.244	0.644172	28.9207
		0.119884	9.84019	0.350918	14.8041	0.852065	27.6951	0.953978	31.1568	0.644708	28.9375
		0.1198	9.71755	0.353137	15.4046	0.850196	27.2114	0.954171	31.1251	0.645324	28.9505
		0.119848	9.68789	0.355249	15.6953	0.852031	27.9653	0.954894	31.3669	0.645956	28.9686
		0.12024	9.82738	0.355698	15.3464	0.854267	28.2144	0.955492	31.511	0.646556	28.992
		0.121652	10.2183	0.354573	14.7452	0.8507	27.2597	0.955761	31.4667	0.647104	29.0153
		0.123648	10.6381	0.354778	14.8403	0.853404	28.2646	0.955998	31.4323	0.647652	29.0282
		0.125132	10.7509	0.356657	15.4342	0.853457	27.8035	0.955698	31.1238	0.64822	29.0425
		0.125024	10.3649	0.358953	16.0011	0.850765	27.3337	0.955876	31.1997	0.648752	29.058
		0.12364	9.61762	0.36051	16.208	0.853878	28.3849	0.955939	31.164	0.64928	29.0775
		0.121964	8.90659	0.360967	15.9788	0.854488	28.1405	0.955865	31.1415	0.6498	29.1008
		0.120668	8.41954	0.359982	15.4766	0.851304	27.5062	0.95639	31.4481	0.650332	29.1203
		0.119972	8.22384	0.360467	15.6577	0.855073	28.7833	0.956604	31.5095	0.650868	29.1423
		0.119996	8.31326	0.362145	16.1644	0.855339	28.3393	0.956208	31.2195	0.65142	29.1578
		0.120836	8.72774	0.363831	16.5212	0.852359	27.7672	0.956194	31.2241	0.651988	29.1747
		0.122032	9.27442	0.364592	16.5331	0.856586	28.9973	0.955863	31.0167	0.652552	29.1825
		0.123092	9.69533	0.364216	16.0878	0.85628	28.3776	0.955214	30.6876	0.653072	29.2071
		0.12302	9.59294	0.363333	15.7119	0.852314	27.4302	0.955008	30.6764	0.65362	29.2265
		0.121512	8.90549	0.364267	16.0211	0.855631	28.6206	0.954692	30.5733	0.654156	29.2408
		0.1188	7.88866	0.365831	16.4612	0.856853	28.4324	0.954188	30.3752	0.654692	29.2563
		0.115704	6.95491	0.366878	16.6005	0.852557	27.4797	0.954053	30.4095	0.655216	29.2745
		0.113276	6.41366	0.367065	16.4433	0.856594	28.8168	0.95362	30.2456	0.655768	29.2913
		0.111724	6.16013	0.365798	15.7688	0.858247	28.729	0.953071	30.0071	0.6563	29.3069
		0.110864	6.0876	0.364349	15.3591	0.854194	27.7176	0.952627	29.8472	0.656864	29.3315
		0.110464	6.10056	0.365084	15.817	0.856982	28.6537	0.951729	29.423	0.657408	29.3509
		0.110012	6.03446	0.366904	16.5021	0.857643	28.3842	0.95112	29.2084	0.65796	29.3652
		0.108756	5.75582	0.367606	16.6401	0.855345	27.9105	0.950516	28.9943	0.658512	29.3782
		0.106652	5.37869	0.366618	16.2899	0.857845	28.6134	0.949551	28.6032	0.659128	29.4054
		0.104404	5.06765	0.364851	15.7514	0.856996	28.0895	0.948557	28.2563	0.65974	29.4313
		0.102464	4.84354	0.363845	15.5446	0.856265	28.0988	0.947843	28.072	0.6603	29.4456
		0.101248	4.7567	0.364178	15.8353	0.859476	28.7944	0.94669	27.6181	0.660848	29.4546
		0.10078	4.79947	0.365265	16.2165	0.856773	27.8715	0.945804	27.3491	0.661392	29.4792
		0.100588	4.83058	0.365973	16.3183	0.857331	28.2831	0.94531	27.2962	0.661912	29.4961
		0.09976	4.64443	0.365078	15.8511	0.859071	28.3855	0.944786	27.1667	0.662432	29.5142
		0.098088	4.31702	0.362773	15.0755	0.855482	27.4156	0.944033	26.9433	0.663004	29.5246
		0.095388	3.9193	0.361471	14.8476	0.857229	28.1847	0.943329	26.769	0.66356	29.5453
		0.092532	3.64325	0.361986	15.2909	0.860431	28.5309	0.942851	26.7551	0.6641	29.5648
		0.0905	3.55771	0.363031	15.6603	0.855696	27.2161	0.942145	26.5589	0.664636	29.5855
		0.089908	3.67435	0.362514	15.4906	0.858486	28.3116	0.941647	26.516	0.665188	29.592
		0.089904	3.80136	0.360635	14.96	0.859945	28.1656	0.941257	26.4711	0.665732	29.6153
		0.089872	3.86616	0.358667	14.5385	0.855255	26.9262	0.940784	26.3693	0.666276	29.6243
		0.089772	3.91152	0.357784	14.5226	0.856855	27.7236	0.94048	26.3753	0.666828	29.6501
		0.089596	3.90634	0.357627	14.6996	0.859522	28.0215	0.940673	26.6442	0.667384	29.6654
		0.089232	3.8195	0.357704	14.7915	0.855496	26.8964	0.94049	26.6158	0.667924	29.6858
		0.08836	3.60178	0.357035	14.582	0.858302	27.8682	0.940408	26.6554	0.668476	29.6973
		0.087112	3.36202	0.355329	14.0204	0.859371	27.6712	0.941057	27.0724	0.669004	29.7179
		0.085876	3.21816	0.354008	13.782	0.855288	26.6584	0.940976	26.964	0.669552	29.7399
		0.085264	3.25704	0.354484	14.1711	0.857978	27.5662	0.940573	26.7071	0.6701	29.7632
		0.085432	3.51494	0.355424	14.4994	0.858539	27.3118	0.940816	26.8425	0.670656	29.7813
		0.086184	3.89856	0.355192	14.4604	0.856327	26.9313	0.941314	27.0962	0.67122	29.7917
		0.087288	4.37126	0.354084	14.1254	0.859747	27.7988	0.941339	27.0446	0.671776	29.802
		0.088372	4.80624	0.352631	13.793	0.859371	27.4434	0.941798	27.2666	0.672328	29.8267
		0.089448	5.23483	0.352129	13.8102	0.859045	27.5451	0.942918	27.8388	0.672884	29.8552
		0.090608	5.65085	0.352984	14.2132	0.862318	28.254	0.943739	28.1671	0.67344	29.8668
		0.091668	6.00984	0.35399	14.4393	0.860273	27.5239	0.944392	28.3924	0.673972	29.8785
		0.092228	6.16536	0.35378	14.2674	0.861229	28.0987	0.944963	28.5661	0.674512	29.885
		0.092352	6.18091	0.352392	13.6761	0.865233	28.7917	0.946016	28.9988	0.675068	29.9109
		0.09266	6.29846	0.35098	13.3762	0.861476	27.5742	0.946804	29.2102	0.67562	29.9329
		0.093712	6.63494	0.352016	13.871	0.863096	28.3393	0.947694	29.4975	0.676176	29.9563
		0.095412	7.10117	0.354808	14.7629	0.866641	28.7905	0.948853	29.8663	0.67674	29.9653
		0.096996	7.46016	0.35711	15.2367	0.863071	27.7573	0.949822	30.0916	0.6773	29.9887
		0.097808	7.56773	0.357461	15.0862	0.864943	28.4926	0.950604	30.2271	0.677864	30.0042
		0.097924	7.52237	0.356169	14.4089	0.867231	28.6842	0.951373	30.3501	0.678428	30.0146
		0.097916	7.4809	0.354814	14.0614	0.865412	28.223	0.951816	30.2806	0.679008	30.034
		0.098068	7.5107	0.355555	14.4017	0.867361	28.735	0.95219	30.2601	0.679596	30.0535
		0.0989	7.74509	0.357867	15.1985	0.867341	28.5652	0.953016	30.5231	0.680156	30.0716
		0.100664	8.16062	0.360073	15.6411	0.867731	28.6411	0.953333	30.4769	0.680712	30.0924
		0.10282	8.56061	0.360967	15.6199	0.870063	29.1294	0.953649	30.508	0.681312	30.1092
		0.104444	8.742	0.360273	15.1152	0.868071	28.3425	0.954053	30.5959	0.681908	30.1248
		0.10506	8.67331	0.35991	14.9803	0.868916	28.8711	0.954545	30.7102	0.682508	30.139
		0.104992	8.49576	0.361263	15.3595	0.870661	28.8664	0.954682	30.5965	0.683084	30.161
		0.104836	8.37653	0.363635	16.0519	0.868447	28.363	0.955092	30.6711	0.68366	30.1766
		0.10488	8.36616	0.365714	16.4286	0.870361	28.9371	0.955361	30.6493	0.684228	30.1947
		0.105052	8.41152	0.366537	16.3091	0.870488	28.8003	0.955365	30.4696	0.684816	30.209
		0.105408	8.50483	0.365827	15.7865	0.870712	28.8479	0.955271	30.3104	0.685388	30.2258
		0.1064	8.76792	0.365841	15.7482	0.872398	29.2437	0.955494	30.3448	0.685988	30.2544
		0.107736	9.01934	0.367322	16.1836	0.870229	28.5922	0.955078	29.9808	0.68658	30.2686
		0.108572	9.04915	0.369114	16.6308	0.871333	29.1538	0.95482	29.766	0.687148	30.2842
		0.108528	8.88586	0.37032	16.7709	0.872537	29.1479	0.95481	29.7013	0.687732	30.3049
		0.10842	8.75885	0.370878	16.6678	0.870335	28.7264	0.954265	29.3002	0.688308	30.3192
		0.108344	8.64998	0.371582	16.7089	0.872635	29.465	0.953633	28.9183	0.688904	30.3308
		0.107836	8.3483	0.372673	16.7935	0.871943	28.9926	0.953173	28.6554	0.689528	30.3516
		0.106676	7.80706	0.3738	16.882	0.8706	28.8631	0.952488	28.2794	0.69014	30.371
		0.10516	7.14912	0.374933	16.9652	0.873402	29.6056	0.951635	27.8777	0.690764	30.3878
		0.103792	6.63494	0.375465	16.7974	0.870129	28.528	0.951241	27.762	0.69136	30.4047
		0.102636	6.23885	0.375135	16.4471	0.8699	28.8584	0.950594	27.47	0.691936	30.4176
		0.101628	5.93856	0.375788	16.5785	0.871557	29.1161	0.949835	27.1753	0.69256	30.4397
		0.10104	5.80378	0.377043	16.854	0.867531	28.1265	0.949331	27.0774	0.693172	30.4591
		0.101	5.8297	0.37782	16.9149	0.86842	28.7178	0.948751	26.8799	0.693768	30.4799
		0.10124	5.91782	0.378018	16.8033	0.8696	28.7634	0.947722	26.5139	0.69434	30.4902
		0.101368	5.9269	0.377043	16.2754	0.866743	28.1965	0.947204	26.4795	0.694932	30.5019
		0.101172	5.80766	0.376343	16.0786	0.868671	28.805	0.946631	26.3593	0.695508	30.5226
		0.099964	5.42794	0.376916	16.4538	0.867331	28.2976	0.945684	26.0461	0.696064	30.5395
		0.097512	4.82707	0.378218	16.9448	0.865884	28.1588	0.945218	26.054	0.69664	30.5615
		0.09442	4.23139	0.378684	17.0254	0.866367	28.3438	0.944518	25.8545	0.697184	30.5771
		0.091884	3.83506	0.377998	16.6699	0.864057	27.7598	0.943441	25.507	0.697776	30.5887
		0.090544	3.69379	0.376284	16.1089	0.864931	28.2123	0.943069	25.6041	0.698348	30.5991
		0.090332	3.76378	0.37578	16.0647	0.864788	28.0273	0.942686	25.6147	0.698948	30.6159
		0.090472	3.87005	0.376545	16.4888	0.863243	27.7869	0.941837	25.3512	0.699588	30.6341
		0.090548	3.89078	0.377347	16.7346	0.863235	27.8457	0.941429	25.3637	0.70024	30.6561
		0.090332	3.80006	0.3768	16.5542	0.86251	27.7116	0.941565	25.6478	0.700864	30.6743
		0.089552	3.57067	0.374914	15.8776	0.862329	27.7804	0.941108	25.5282	0.701464	30.6963
		0.088364	3.28949	0.372763	15.3061	0.862814	27.8174	0.940663	25.4364	0.702072	30.7092
		0.087128	3.0528	0.371882	15.2633	0.860551	27.2651	0.940594	25.5718	0.702716	30.7183
		0.08594	2.86406	0.371822	15.4562	0.863357	28.1114	0.940724	25.7813	0.70338	30.7326
		0.084732	2.70744	0.371571	15.4423	0.861994	27.4653	0.940216	25.5771	0.704052	30.7533
		0.08352	2.56618	0.370082	15.1636	0.861388	27.5803	0.940224	25.7291	0.704716	30.7831
		0.082572	2.50526	0.368333	14.8312	0.864102	28.1742	0.940684	26.1234	0.705368	30.8013
		0.082156	2.54285	0.367233	14.736	0.86231	27.5334	0.941002	26.3969	0.706016	30.8155
		0.082192	2.65949	0.366616	14.8318	0.862445	27.8736	0.941457	26.7438	0.706624	30.8298
		0.082336	2.77483	0.365892	14.8061	0.864735	28.1934	0.942078	27.172	0.707308	30.8492
		0.082712	2.9856	0.36498	14.6924	0.861622	27.3979	0.942727	27.5783	0.70798	30.87
		0.083476	3.34282	0.363963	14.5675	0.863918	28.1233	0.943276	27.9212	0.708664	30.8868
		0.084492	3.78322	0.362982	14.4723	0.864249	27.9304	0.943888	28.2754	0.709328	30.9024
		0.085464	4.19016	0.362253	14.4723	0.863543	27.785	0.944473	28.58	0.71002	30.9179
		0.086376	4.55784	0.361602	14.4445	0.865233	28.1537	0.945065	28.8588	0.710724	30.936
		0.087332	4.91246	0.360706	14.2952	0.8644	27.7612	0.945927	29.215	0.711404	30.9529
		0.088328	5.27501	0.359294	14.0044	0.865282	28.1365	0.946727	29.433	0.712096	30.9775
		0.088968	5.48496	0.358494	13.943	0.868018	28.5349	0.947518	29.6597	0.712768	30.9957
		0.08918	5.54976	0.358231	14.0441	0.865839	27.8775	0.948188	29.8267	0.713472	31.0151
		0.089132	5.53939	0.358176	14.1631	0.868602	28.7615	0.9493	30.2014	0.714164	31.0371
		0.089276	5.62234	0.357639	14.0971	0.870065	28.5996	0.949633	30.132	0.714848	31.0462
		0.08994	5.88144	0.356133	13.6485	0.866937	27.8491	0.950167	30.2799	0.715536	31.0631
		0.091336	6.32419	0.354627	13.4015	0.870553	29.0124	0.951043	30.5415	0.7162	31.0747
		0.09338	6.86674	0.354669	13.6611	0.873029	29.0765	0.951763	30.6585	0.716848	31.0903
		0.095616	7.37722	0.355182	13.9175	0.869345	28.1317	0.952251	30.7311	0.717504	31.0993
		0.097604	7.7736	0.354941	13.9121	0.873512	29.4319	0.952945	30.9373	0.718204	31.1304
		0.099288	8.05046	0.354006	13.6922	0.874873	29.1603	0.953586	31.1117	0.718916	31.1603
		0.100492	8.2068	0.353108	13.5481	0.871643	28.2903	0.953829	31.0939	0.719624	31.1719
		0.100996	8.1901	0.353084	13.6353	0.874188	29.2026	0.954196	31.2069	0.720332	31.1862
		0.10102	8.12918	0.353912	13.9643	0.877065	29.4306	0.954533	31.2624	0.721044	31.2043
		0.101584	8.29757	0.35468	14.1493	0.873094	28.4046	0.954669	31.191	0.721784	31.2262
		0.103256	8.65906	0.354843	14.1036	0.876565	29.5396	0.954608	30.9988	0.722504	31.2454
		0.105396	9.01416	0.353869	13.7322	0.877808	29.3183	0.954988	31.0767	0.723208	31.2594
		0.106708	9.07248	0.353198	13.6418	0.87351	28.1694	0.954998	30.8891	0.723904	31.2798
		0.106824	8.85994	0.354173	14.0891	0.876118	29.087	0.954833	30.6605	0.724608	31.2965
		0.106324	8.59555	0.355898	14.4901	0.877247	28.8637	0.955367	30.8771	0.725316	31.312
		0.10608	8.52946	0.356653	14.5807	0.874694	28.2949	0.955573	30.8441	0.726012	31.3288
		0.106228	8.63573	0.357049	14.5536	0.877794	29.2219	0.955449	30.675	0.726732	31.3444
		0.106832	8.89493	0.357788	14.6633	0.878027	28.8024	0.955908	30.8712	0.727476	31.3664
		0.108364	9.31205	0.358553	14.8701	0.875894	28.3875	0.95591	30.7516	0.728248	31.3859
		0.110452	9.70685	0.359822	15.1793	0.879012	29.1743	0.955757	30.5739	0.729	31.4027
		0.111704	9.76517	0.361127	15.3405	0.876555	28.2573	0.955837	30.5507	0.729792	31.4234
		0.111796	9.57509	0.360778	14.8827	0.87621	28.4059	0.955573	30.2904	0.730588	31.4403
		0.111416	9.36797	0.359151	14.2821	0.877788	28.7224	0.955498	30.1847	0.731344	31.4584
		0.111104	9.23059	0.359422	14.4077	0.875939	28.2302	0.955496	30.1108	0.732108	31.4805
		0.110908	9.13598	0.361596	15.1074	0.876522	28.4978	0.954963	29.721	0.732888	31.5051
		0.110828	9.0971	0.363433	15.4715	0.876398	28.3082	0.954831	29.6002	0.73366	31.5155
		0.11076	9.08803	0.364131	15.5091	0.874941	28.0948	0.954539	29.3702	0.734504	31.5349
		0.110656	9.06082	0.364447	15.4067	0.875835	28.4073	0.953741	28.8562	0.735332	31.5556
		0.110492	8.97787	0.364969	15.4245	0.873692	27.8054	0.953316	28.5932	0.736096	31.5738
		0.110072	8.77699	0.365769	15.6147	0.873386	27.9713	0.95312	28.4472	0.736784	31.5919
		0.109372	8.46336	0.36701	15.8995	0.873394	27.9263	0.952924	28.2918	0.737488	31.6101
		0.1089	8.27414	0.367724	15.9384	0.871467	27.5187	0.9526	28.0765	0.738224	31.6256
		0.10894	8.32987	0.367553	15.6774	0.871598	27.6356	0.952376	27.9457	0.738988	31.6451
		0.109452	8.56963	0.367055	15.4561	0.870147	27.2656	0.952437	27.99	0.73974	31.6606
		0.110184	8.89622	0.36729	15.5116	0.869355	27.3601	0.952165	27.8089	0.740464	31.6813
		0.110596	9.0349	0.368043	15.7626	0.870445	27.5834	0.951945	27.661	0.74118	31.7021
		0.110296	8.8392	0.368553	15.8182	0.866604	26.5501	0.952071	27.7079	0.741916	31.7176
		0.109364	8.37811	0.368196	15.5896	0.866939	27.2015	0.95258	27.9305	0.742636	31.7384
		0.107912	7.76947	0.366765	15.0816	0.868533	27.4169	0.95272	27.912	0.74336	31.7552
		0.106208	7.1219	0.366216	14.9607	0.86302	26.0513	0.95319	28.0983	0.744112	31.7772
		0.104644	6.6155	0.366861	15.2706	0.864533	27.0198	0.953592	28.2521	0.744872	31.7993
		0.103348	6.23755	0.367612	15.4423	0.865278	27.0244	0.954241	28.5415	0.745592	31.8187
		0.10218	5.93856	0.367376	15.3248	0.860537	25.9132	0.954314	28.4458	0.7463	31.8369
		0.10108	5.67158	0.366163	14.8431	0.862208	26.745	0.95452	28.4683	0.747012	31.8576
		0.100084	5.46293	0.364557	14.4295	0.862339	26.6743	0.955076	28.6997	0.74776	31.8719
		0.099372	5.33851	0.364059	14.4486	0.859563	26.161	0.95539	28.7532	0.74852	31.8952
		0.099104	5.31778	0.36439	14.6587	0.861349	26.7509	0.95602	28.9964	0.74926	31.9133
		0.098988	5.3113	0.363755	14.5265	0.860722	26.486	0.956976	29.4125	0.750008	31.9315
		0.09848	5.16874	0.362916	14.3825	0.859853	26.5382	0.957759	29.7065	0.75078	31.9405
		0.0973	4.88645	0.362022	14.2352	0.861839	26.9564	0.958704	30.0738	0.751528	31.9574
		0.095928	4.65106	0.361229	14.1335	0.859167	26.0843	0.959716	30.4518	0.752236	31.9729
		0.095368	4.66536	0.36059	14.0853	0.859747	26.6894	0.960629	30.7127	0.752964	31.9924
		0.095696	4.88002	0.359561	13.9334	0.862165	27.0832	0.961429	30.8615	0.753668	32.0118
		0.096508	5.21539	0.358008	13.6348	0.858102	26.0261	0.962616	31.2182	0.754376	32.0287
		0.097192	5.47459	0.356429	13.3995	0.860671	27.0693	0.963245	31.1542	0.755136	32.0403
		0.097424	5.52125	0.355488	13.342	0.862471	27.3058	0.963673	31.02	0.755944	32.0598
		0.097392	5.46163	0.355022	13.3896	0.860933	26.9438	0.964035	30.9639	0.756768	32.0779
		0.09746	5.43571	0.354471	13.3301	0.862973	27.5325	0.965037	31.201	0.757524	32.1064
		0.097652	5.48366	0.352984	13.0888	0.862614	27.3138	0.965308	31.0161	0.758236	32.1233
		0.097928	5.55106	0.351773	12.9745	0.862324	27.393	0.966104	31.2586	0.758948	32.1349
		0.098292	5.66899	0.351122	13.0281	0.863992	27.7829	0.967255	31.5797	0.759676	32.1544
		0.09914	5.98757	0.351157	13.2732	0.862508	27.3567	0.967545	31.3782	0.760384	32.1673
		0.100448	6.47568	0.351431	13.4516	0.863804	27.9262	0.967708	31.3042	0.761116	32.1933
		0.101928	6.95731	0.350747	13.2435	0.865969	28.1475	0.968531	31.5652	0.761904	32.2166
		0.103456	7.41091	0.348	12.4137	0.863753	27.6138	0.968563	31.2923	0.762684	32.2296
		0.1049	7.78157	0.345865	12.1071	0.866637	28.503	0.968292	31.0042	0.763396	32.2464
		0.105716	7.93838	0.345606	12.4796	0.866269	27.9547	0.968737	31.1871	0.7641	32.2581
		0.105964	7.9332	0.346812	13.0796	0.865194	27.7922	0.969082	31.2545	0.764824	32.2827
		0.106412	8.04562	0.347273	13.246	0.868229	28.5514	0.968784	31.0259	0.765536	32.3034
		0.107912	8.41838	0.346204	12.8556	0.866471	27.7341	0.96898	31.1732	0.76622	32.3216
		0.110244	8.93251	0.343512	12.0806	0.866345	27.8848	0.969178	31.3087	0.766984	32.3384
		0.112416	9.33946	0.342127	11.9247	0.869749	28.5739	0.969202	31.3186	0.76778	32.3604
		0.114024	9.62678	0.342376	12.2993	0.867171	27.7553	0.968684	31.0365	0.768556	32.3773
		0.114964	9.74203	0.343571	12.7407	0.868645	28.3354	0.968484	30.9862	0.769296	32.3916
		0.115392	9.74477	0.3438	12.8404	0.872637	29.0014	0.968141	30.8329	0.77002	32.4084
		0.116056	9.86774	0.343133	12.5688	0.86908	27.8497	0.967618	30.595	0.77074	32.4214
		0.117624	10.1576	0.342247	12.3726	0.87121	28.6716	0.967035	30.3386	0.771452	32.4434
		0.119792	10.4969	0.342194	12.475	0.873784	28.7998	0.966422	30.0942	0.772148	32.4693
		0.121188	10.5332	0.34259	12.6593	0.869763	27.6905	0.965424	29.6337	0.772908	32.4875
		0.12156	10.3699	0.342604	12.6924	0.871724	28.5019	0.964571	29.3001	0.773668	32.4939
		0.121236	10.1301	0.342314	12.5978	0.874337	28.7649	0.963841	29.0345	0.774404	32.5056
		0.121124	10.064	0.342261	12.5945	0.871329	28.0157	0.962835	28.6103	0.775088	32.5328
		0.121648	10.2662	0.343104	12.8001	0.873798	28.8144	0.961902	28.2879	0.77578	32.5523
		0.123484	10.725	0.344382	13.1159	0.873906	28.492	0.961202	28.1187	0.776472	32.5678
		0.125828	11.1306	0.345761	13.3571	0.871904	28.0757	0.960349	27.8618	0.777168	32.5834
		0.127224	11.1617	0.346424	13.3988	0.873963	28.5653	0.959373	27.5559	0.777884	32.5976
		0.127344	10.9453	0.345953	13.1325	0.872214	27.8213	0.958106	27.1925	0.77864	32.6158
		0.12684	10.6537	0.346418	13.2336	0.871459	27.8392	0.957276	27.1113	0.779384	32.6365
		0.12632	10.4204	0.3485	13.8249	0.873178	28.0836	0.956398	26.9567	0.780088	32.6533
		0.12602	10.3012	0.350761	14.2226	0.871084	27.4487	0.955357	26.7128	0.780776	32.6715
		0.125928	10.3154	0.351945	14.3137	0.871804	27.6971	0.954304	26.5206	0.781452	32.6935
		0.126096	10.4567	0.352576	14.2761	0.87171	27.4929	0.953927	26.6216	0.782164	32.7091
		0.126656	10.7405	0.353314	14.3514	0.870416	27.1844	0.953047	26.3487	0.782868	32.735
		0.127756	11.1343	0.354373	14.5754	0.870971	27.2927	0.952022	26.0739	0.783588	32.7544
		0.128576	11.2729	0.355737	14.8244	0.869449	26.8025	0.951396	26.0409	0.784312	32.7765
		0.128296	10.9464	0.35709	14.9864	0.869869	27.0859	0.950912	25.9967	0.785056	32.7946
		0.12688	10.2652	0.357855	14.9375	0.870004	27.0099	0.950218	25.8282	0.785756	32.8011
		0.124944	9.50102	0.358392	14.9653	0.86851	26.6591	0.949771	25.7998	0.78644	32.8128
		0.123256	8.91307	0.358969	15.0294	0.87002	27.072	0.949131	25.6735	0.787104	32.8385
		0.122416	8.70053	0.359851	15.1945	0.86912	26.7067	0.948643	25.6649	0.787764	32.8577
		0.122304	8.7433	0.360876	15.3048	0.868545	26.774	0.94828	25.7092	0.788464	32.8731
		0.122268	8.80421	0.361027	15.0907	0.870061	27.0277	0.94809	25.8181	0.789172	32.8884
		0.122108	8.79902	0.361016	15.0128	0.868188	26.5316	0.948053	25.99	0.789896	32.9103
		0.121828	8.71867	0.361941	15.1971	0.869449	26.9194	0.948527	26.3396	0.790592	32.9295
		0.121232	8.52168	0.362622	15.246	0.869229	26.7648	0.949022	26.6105	0.79128	32.9489
		0.11986	8.07634	0.362378	15.1351	0.868498	26.6856	0.949167	26.6627	0.791932	32.9671
		0.117808	7.50398	0.362243	15.069	0.870227	27.1229	0.949124	26.6073	0.792576	32.9878
		0.115524	6.9625	0.361912	14.921	0.869331	26.8448	0.949688	26.9151	0.793224	32.9969
		0.1135	6.54946	0.36131	14.7657	0.870241	27.2748	0.950141	27.1159	0.793912	33.0137
		0.111588	6.19742	0.361208	14.7901	0.871492	27.5107	0.950224	27.11	0.79464	33.0345
		0.109724	5.8932	0.361147	14.7611	0.872147	27.6864	0.951198	27.6207	0.795384	33.0552
		0.107948	5.634	0.360861	14.6276	0.873976	28.2123	0.952249	28.1129	0.796092	33.0798
		0.106468	5.46811	0.360478	14.5114	0.873553	27.989	0.952784	28.2708	0.796752	33.0993
		0.1056	5.42923	0.360437	14.512	0.874178	28.3531	0.953606	28.5979	0.797384	33.1135
		0.105044	5.4085	0.360218	14.4479	0.876765	28.8209	0.954667	29.0393	0.79802	33.1278
		0.1039	5.21798	0.359882	14.3494	0.87319	27.9819	0.955492	29.2711	0.798676	33.1524
		0.102184	4.94328	0.359106	14.1003	0.874812	28.7173	0.95671	29.6815	0.79936	33.1654
		0.100628	4.79429	0.358214	13.8956	0.876702	28.8765	0.957773	29.8908	0.800088	33.1822
		0.099848	4.80077	0.357808	13.8599	0.872706	27.9165	0.958486	29.9166	0.800768	33.2016
		0.09966	4.88621	0.357818	13.9346	0.875245	28.9286	0.959492	30.1234	0.801424	33.2224
		0.099568	4.92898	0.3572	13.8137	0.876751	28.8493	0.960069	30.1135	0.802064	33.2418
		0.099204	4.85659	0.356312	13.6763	0.872765	27.894	0.960365	30.0355	0.802688	33.2626
		0.098176	4.63416	0.355533	13.5812	0.876	28.8974	0.96101	30.1981	0.803284	33.2794
		0.096756	4.3897	0.355222	13.568	0.875522	28.4257	0.961445	30.2224	0.803884	33.2976
		0.0958	4.34698	0.354565	13.4398	0.874465	28.2474	0.96169	30.159	0.804488	33.3183
		0.095616	4.46621	0.353484	13.2832	0.875808	28.5664	0.962257	30.2925	0.805116	33.339
		0.095752	4.61098	0.352129	13.0281	0.874882	28.2064	0.962516	30.2409	0.805764	33.352
		0.095844	4.69608	0.350855	12.8656	0.874749	28.4191	0.962855	30.2786	0.806412	33.3649
		0.095972	4.76448	0.350167	12.9289	0.876984	28.7614	0.963476	30.4815	0.807044	33.3883
		0.096584	5.0171	0.350751	13.2771	0.8747	28.1152	0.963804	30.4776	0.807652	33.4077
		0.097648	5.44738	0.350951	13.3446	0.87701	28.9999	0.964027	30.4551	0.808272	33.4233
		0.098924	5.94226	0.350592	13.2164	0.877796	28.8671	0.964137	30.3447	0.80886	33.4401
		0.099876	6.26592	0.350043	13.0796	0.875957	28.5328	0.963945	30.1003	0.80946	33.457
		0.100352	6.38875	0.349618	13.0499	0.87779	29.0508	0.963573	29.7607	0.81008	33.4738
		0.100504	6.39648	0.349967	13.3009	0.875794	28.4549	0.963206	29.4634	0.8107	33.4829
		0.101088	6.59578	0.350443	13.4238	0.875994	28.6042	0.962533	29.0082	0.811308	33.501
		0.1022	6.94694	0.350102	13.2804	0.877369	28.8269	0.962196	28.8021	0.81192	33.514
		0.10356	7.34482	0.349073	12.9758	0.87622	28.4998	0.961794	28.5424	0.812744	33.5373
		0.104356	7.5107	0.348888	12.9818	0.877957	29.1386	0.961092	28.138	0.814156	33.5762
		0.10462	7.52626	0.349776	13.365	0.87772	28.7541	0.960416	27.801	0.816024	33.6332
		0.10478	7.53274	0.351582	13.8156	0.875331	28.3419	0.960249	27.7514	0.817928	33.6967
		0.105324	7.68043	0.351961	13.8454	0.877739	28.9847	0.959524	27.3569	0.819836	33.7499
		0.10648	7.99488	0.351061	13.4899	0.875088	28.188	0.958904	27.0774	0.821908	33.8043
		0.107984	8.3495	0.350641	13.4106	0.874941	28.4013	0.958776	27.0821	0.82384	33.8561
		0.109316	8.61888	0.351249	13.6268	0.877931	29.0395	0.958176	26.8145	0.82556	33.8989
		0.110168	8.71738	0.352961	14.1871	0.874778	28.0967	0.957127	26.3936	0.827404	33.9546
		0.110756	8.77829	0.354906	14.5385	0.876259	28.7349	0.956641	26.3468	0.829296	34.0052
		0.111528	8.90789	0.355245	14.3469	0.877018	28.5102	0.956049	26.1882	0.831104	34.0596
		0.11288	9.16838	0.355212	14.2431	0.874676	27.9566	0.955165	25.8935	0.832884	34.1063
		0.113892	9.26688	0.356586	14.4386	0.875549	28.2084	0.954969	25.9622	0.834504	34.1594
		0.114272	9.23059	0.357363	14.3686	0.875018	27.9269	0.954571	25.8472	0.835884	34.2009
		0.114856	9.33038	0.357992	14.3739	0.87448	27.8735	0.953933	25.6225	0.83724	34.2359
		0.115996	9.5557	0.359645	14.7407	0.874994	27.9145	0.953747	25.6774	0.838684	34.2773
		0.116856	9.60235	0.361578	15.0829	0.873343	27.4408	0.953329	25.5512	0.840396	34.324
		0.116856	9.38866	0.362073	15.0578	0.874118	27.6139	0.952637	25.316	0.8424	34.3797
		0.116588	9.16579	0.3626	15.0941	0.8739	27.3985	0.952722	25.5222	0.844272	34.4351
		0.116076	8.8703	0.363686	15.2599	0.873767	27.4197	0.952659	25.583	0.84586	34.4646
		0.115416	8.53464	0.364773	15.3867	0.874598	27.5915	0.952224	25.4284	0.84766	34.5084
		0.115072	8.36875	0.36568	15.5366	0.874088	27.3952	0.952047	25.4515	0.849832	34.5768
		0.115228	8.418	0.366318	15.6463	0.875029	27.5828	0.952108	25.581	0.852204	34.6377
		0.115492	8.52038	0.366945	15.7283	0.875218	27.4593	0.951671	25.388	0.854688	34.7012
		0.11576	8.60851	0.367824	15.8585	0.87428	27.2796	0.951696	25.5208	0.857172	34.7699
		0.116444	8.89882	0.3684	15.8651	0.875702	27.5432	0.95191	25.7528	0.859724	34.836
		0.117712	9.38573	0.368816	15.8995	0.875178	27.3179	0.952573	26.214	0.862268	34.8995
		0.118904	9.71342	0.369543	16.0138	0.876159	27.6258	0.952957	26.479	0.864868	34.9591
		0.118876	9.47251	0.369949	16.0045	0.876959	27.6436	0.953292	26.7202	0.867316	35.0161
		0.117524	8.77723	0.370061	15.943	0.876212	27.4632	0.953739	27.0228	0.869108	35.0641
		0.115228	7.84978	0.369763	15.7389	0.878039	27.8577	0.954445	27.4568	0.870124	35.0939
		0.112424	6.91747	0.369612	15.6418	0.877686	27.6271	0.954737	27.6206	0.870836	35.112
		0.109436	6.11962	0.370157	15.8439	0.879012	28.1318	0.955608	28.1207	0.87154	35.1302
		0.107292	5.67806	0.371231	16.1564	0.882716	28.7238	0.956647	28.6215	0.87226	35.1444
		0.106248	5.54458	0.371631	16.1902	0.880506	27.937	0.957394	28.9393	0.872988	35.1561
		0.106048	5.6016	0.371316	15.9245	0.883394	28.817	0.958271	29.2545	0.873704	35.1781
		0.106084	5.67029	0.370684	15.6867	0.883449	28.3809	0.958961	29.4521	0.874416	35.2015
		0.10598	5.65085	0.370716	15.7561	0.881906	28.1331	0.959786	29.7178	0.875136	35.2131
		0.105188	5.4409	0.371214	15.9596	0.883449	28.5869	0.960684	30.0165	0.875868	35.23
		0.1037	5.10653	0.371555	16.0256	0.882955	28.2685	0.961627	30.2741	0.876608	35.2507
		0.101916	4.78032	0.371173	15.8492	0.883271	28.4905	0.9621	30.3435	0.87734	35.2702
		0.100404	4.55141	0.369716	15.3444	0.886994	29.2205	0.963014	30.683	0.878072	35.2844
		0.098964	4.31717	0.368682	15.1099	0.884537	28.3815	0.963582	30.8204	0.878804	35.3039
		0.097484	4.08	0.368824	15.3398	0.886692	29.1063	0.964322	30.9743	0.879528	35.3194
		0.095912	3.86616	0.36859	15.3042	0.887898	29.025	0.964665	30.9591	0.88026	35.3388
		0.09442	3.70675	0.367608	15.0875	0.88578	28.5447	0.96549	31.2121	0.881008	35.3583
		0.093384	3.67176	0.366373	14.7836	0.888006	29.3243	0.966106	31.3146	0.88174	35.3738
		0.092576	3.62381	0.365567	14.6739	0.888986	29.0778	0.966835	31.3768	0.882424	35.3907
		0.0915	3.48384	0.365227	14.697	0.886659	28.6801	0.96699	31.2096	0.883124	35.4036
		0.08998	3.27518	0.364741	14.6356	0.890029	29.4901	0.967237	31.1237	0.883868	35.4283
		0.088476	3.13781	0.363951	14.514	0.887529	28.6378	0.967663	31.1792	0.884596	35.4542
		0.087504	3.13262	0.363088	14.3692	0.887712	28.7792	0.967729	31.0233	0.885332	35.471
		0.087144	3.22075	0.362165	14.2299	0.888027	28.8684	0.967622	30.9585	0.88608	35.484
		0.086972	3.26222	0.361859	14.29	0.887547	28.7211	0.9678	31.0689	0.886832	35.5008
		0.086564	3.21043	0.361971	14.4116	0.888447	28.9708	0.968196	31.2823	0.887568	35.5216
		0.085764	3.05928	0.361786	14.3739	0.887688	28.7693	0.968043	31.1146	0.888312	35.5332
		0.084568	2.8537	0.361353	14.2392	0.887439	28.8222	0.96791	30.9942	0.889072	35.5514
		0.083316	2.69966	0.36108	14.1751	0.888382	29.0376	0.967841	30.9124	0.88984	35.5656
		0.082472	2.68411	0.36069	14.1117	0.886306	28.5527	0.967665	30.7669	0.890584	35.5825
		0.082232	2.80838	0.360335	14.0575	0.887276	29.0165	0.967161	30.4346	0.89134	35.598
		0.082664	3.11765	0.359931	13.9696	0.886614	28.6623	0.967192	30.4834	0.89206	35.6149
		0.083448	3.52282	0.359227	13.7813	0.883898	28.2547	0.96701	30.3711	0.89276	35.6317
		0.084384	3.94781	0.35889	13.7489	0.885633	28.8578	0.966394	29.9991	0.893476	35.6447
		0.085236	4.31189	0.359122	13.8486	0.883135	28.1212	0.966233	29.9337	0.894188	35.6616
		0.086084	4.66781	0.359318	13.9147	0.882227	28.2441	0.96611	29.8657	0.894912	35.681
		0.087024	5.0328	0.359576	13.9788	0.883651	28.5012	0.965588	29.5374	0.895676	35.694
		0.088004	5.38646	0.359192	13.7482	0.880588	27.7143	0.965237	29.3491	0.89644	35.7082
		0.088636	5.58734	0.358839	13.6272	0.881294	28.1484	0.965129	29.2796	0.897172	35.7315
		0.088736	5.61067	0.359433	13.8578	0.880898	27.9039	0.964631	28.9751	0.897892	35.7549
		0.088576	5.55365	0.360945	14.2675	0.877353	27.1884	0.964149	28.7108	0.898604	35.7704
		0.088608	5.6016	0.362239	14.5061	0.879745	27.964	0.963782	28.5138	0.899328	35.7873
		0.089184	5.83613	0.363312	14.6819	0.877688	27.2782	0.963445	28.3189	0.900072	35.8028
		0.090456	6.25037	0.364143	14.8272	0.87529	27.0536	0.963053	28.134	0.900852	35.8197
		0.09224	6.75274	0.365278	15.0572	0.877959	27.7169	0.962902	28.0639	0.90162	35.8352
		0.094032	7.17504	0.366812	15.3849	0.87532	27.0628	0.962284	27.7381	0.902364	35.8585
		0.095608	7.49904	0.367755	15.4753	0.875384	27.4222	0.961708	27.4772	0.903116	35.8832
		0.097024	7.76462	0.368176	15.3709	0.876173	27.5623	0.961551	27.4514	0.903876	35.9013
		0.098372	7.97683	0.368467	15.2962	0.873765	27.0872	0.961231	27.2836	0.90464	35.9169
		0.099104	8.00016	0.3691	15.39	0.875351	27.7188	0.96088	27.0926	0.905412	35.9324
		0.099124	7.86442	0.369702	15.4626	0.874653	27.3105	0.960973	27.1375	0.906168	35.9519
		0.099016	7.80101	0.370745	15.6305	0.871418	26.8031	0.960845	27.0239	0.906948	35.9687
		0.099288	7.91232	0.371569	15.692	0.87472	27.6693	0.960806	26.9849	0.90772	35.9907
		0.1004	8.22288	0.372237	15.7627	0.872649	26.8652	0.961316	27.2637	0.908488	36.0076
		0.102252	8.59954	0.373516	15.9425	0.87151	26.9425	0.961829	27.5069	0.909252	36.027
		0.103868	8.7731	0.374922	16.1486	0.874	27.4546	0.962071	27.5645	0.90998	36.0386
		0.104508	8.68627	0.375767	16.1764	0.872533	27.0152	0.96281	27.9153	0.91074	36.0578
		0.104304	8.45688	0.376671	16.2537	0.873698	27.4354	0.963094	27.9464	0.911504	36.0783
		0.104072	8.3195	0.37761	16.3567	0.874304	27.4797	0.963218	27.9081	0.912264	36.0949
		0.103932	8.23915	0.378251	16.4116	0.874094	27.4202	0.963788	28.1393	0.913	36.1038
		0.10392	8.20286	0.378635	16.3707	0.875586	27.7559	0.964318	28.3355	0.913728	36.1206
		0.103952	8.17435	0.378743	16.3231	0.874757	27.3767	0.965078	28.648	0.914504	36.1373
		0.104108	8.23008	0.378922	16.3158	0.875157	27.5789	0.965984	29.0054	0.915248	36.1554
		0.104408	8.35709	0.379096	16.2828	0.876463	27.7117	0.966594	29.1693	0.915992	36.1749
		0.10536	8.67072	0.379114	16.2887	0.875702	27.495	0.967449	29.495	0.916748	36.1969
		0.106592	8.93381	0.379039	16.2669	0.877773	28.0922	0.968522	29.8756	0.917476	36.2176
		0.107344	8.96362	0.379241	16.3178	0.878092	27.8359	0.969404	30.1399	0.918236	36.2397
		0.107184	8.72256	0.379471	16.3594	0.878206	27.9257	0.970416	30.4669	0.919012	36.2578
		0.106456	8.32502	0.379524	16.3488	0.880229	28.2402	0.971129	30.6083	0.91978	36.2721
		0.105352	7.80322	0.379131	16.2028	0.878812	27.7526	0.971896	30.8032	0.920552	36.2785
		0.104008	7.21522	0.378633	16.0957	0.879698	27.9429	0.972876	31.082	0.921328	36.2941
		0.102736	6.71909	0.378253	16.0144	0.880159	27.9251	0.973196	30.9632	0.922096	36.3135
		0.101472	6.27245	0.377902	15.9583	0.879378	27.7896	0.973961	31.1904	0.922856	36.3278
		0.100356	5.91653	0.377259	15.8156	0.881963	28.3723	0.974808	31.3873	0.923612	36.3485
		0.099492	5.67418	0.376388	15.552	0.88099	27.9416	0.975031	31.2492	0.924376	36.3757
		0.099032	5.55235	0.375433	15.361	0.881884	28.3149	0.975388	31.3067	0.925152	36.3991
		0.098388	5.36702	0.374565	15.2303	0.883916	28.5256	0.975876	31.4315	0.925896	36.4146
		0.09722	5.0508	0.373647	15.0803	0.883443	28.3109	0.976124	31.411	0.926616	36.4237
		0.09578	4.72853	0.372547	14.9124	0.884794	28.6486	0.976633	31.5914	0.927344	36.4405
		0.094404	4.46851	0.371912	14.9673	0.884747	28.3446	0.977055	31.6436	0.928084	36.46
		0.093128	4.242	0.371435	14.9428	0.884533	28.348	0.977102	31.4963	0.92882	36.4755
		0.09198	4.0463	0.370137	14.7736	0.8872	28.9274	0.977592	31.6284	0.92954	36.495
		0.091192	3.96595	0.368973	14.6765	0.884324	28.0381	0.977671	31.4997	0.930216	36.5066
		0.09086	3.96984	0.368257	14.6474	0.885473	28.5092	0.977529	31.2797	0.930892	36.5209
		0.090892	4.0139	0.367408	14.5417	0.88688	28.5257	0.9778	31.3821	0.931572	36.5339
		0.09076	3.97373	0.366322	14.4347	0.884806	27.9753	0.977847	31.318	0.932292	36.5559
		0.090296	3.84154	0.365373	14.3428	0.886378	28.4708	0.977588	31.1304	0.933004	36.5727
		0.089244	3.59918	0.364649	14.323	0.886269	28.0764	0.977584	31.1204	0.933728	36.5948
		0.088092	3.39182	0.363945	14.255	0.884112	27.7116	0.977265	30.9195	0.934448	36.6116
		0.087292	3.29203	0.362806	14.0415	0.886722	28.3723	0.976435	30.4551	0.935164	36.6233
		0.08706	3.32832	0.361618	13.8989	0.883786	27.3727	0.976067	30.3229	0.935888	36.6401
		0.08712	3.41645	0.36121	13.9584	0.88262	27.4176	0.975194	29.8737	0.936612	36.6557
		0.087244	3.48773	0.361308	14.0773	0.885347	27.9706	0.974296	29.4732	0.937328	36.6751
		0.087284	3.50198	0.360798	14.0073	0.882073	26.9875	0.973884	29.3781	0.93804	36.6933
		0.087316	3.51494	0.359745	13.7939	0.882914	27.5095	0.973273	29.1369	0.938788	36.7088
		0.087332	3.51106	0.358737	13.677	0.884127	27.5986	0.972467	28.7952	0.939528	36.727
		0.087312	3.48902	0.358255	13.7318	0.880163	26.4794	0.972086	28.7245	0.940248	36.7477
		0.087052	3.39312	0.357582	13.6743	0.881302	27.2022	0.971304	28.4332	0.940964	36.7645
		0.086772	3.32573	0.357051	13.6347	0.882484	27.1758	0.970073	27.9561	0.941688	36.784
		0.08666	3.32832	0.357816	13.9499	0.878116	26.2567	0.969084	27.6654	0.94242	36.8021
		0.08676	3.39701	0.359165	14.2412	0.881255	27.3052	0.96811	27.4124	0.94314	36.8268
		0.086972	3.52531	0.359065	13.9459	0.88071	26.9894	0.966961	27.0589	0.94382	36.8384
		0.087572	3.79618	0.358016	13.5587	0.877835	26.4893	0.965824	26.7815	0.94448	36.8436
		0.088784	4.31294	0.358678	13.7865	0.879618	27.1216	0.964929	26.6223	0.945164	36.863
		0.090916	5.12765	0.360033	14.1744	0.87791	26.5614	0.963843	26.4011	0.94588	36.8864
		0.093496	6.012	0.360533	14.2332	0.876359	26.5521	0.962873	26.2491	0.946604	36.9071
		0.096036	6.75283	0.361261	14.3667	0.878051	26.9426	0.961853	26.0727	0.947316	36.9265
		0.097752	7.15949	0.362345	14.5827	0.874567	25.8987	0.960955	25.9656	0.948024	36.9408
		0.098376	7.2191	0.36321	14.7142	0.873569	26.186	0.960467	26.0804	0.948732	36.9525
		0.098248	7.09469	0.364173	14.8648	0.876953	26.9696	0.959963	26.0884	0.949464	36.9693
		0.097964	6.95472	0.364855	14.9323	0.872506	25.7204	0.959057	25.8439	0.95018	36.9849
		0.097936	6.96509	0.366161	15.3056	0.874392	26.6869	0.958737	25.9688	0.95088	37.003
		0.09828	7.12838	0.368002	15.6472	0.876141	26.969	0.958341	25.9166	0.951576	37.0237
		0.099592	7.53384	0.368639	15.5547	0.87328	26.2774	0.957288	25.542	0.952276	37.0458
		0.102312	8.12952	0.368451	15.2746	0.874469	26.8673	0.956829	25.5883	0.952964	37.0678
		0.10512	8.59171	0.369365	15.3689	0.875882	27.0595	0.956812	25.8413	0.95368	37.0872
		0.107184	8.86382	0.370159	15.394	0.872241	26.2667	0.956329	25.7574	0.954416	37.1067
		0.10804	8.92603	0.370906	15.4713	0.875657	27.4004	0.956414	26.0289	0.955136	37.1287
		0.108376	8.90011	0.3716	15.5135	0.875431	26.9517	0.956606	26.239	0.955816	37.1391
		0.108492	8.88845	0.372478	15.6041	0.872945	26.6135	0.956616	26.2978	0.956512	37.1469
		0.109452	9.14765	0.373471	15.6967	0.876396	27.5926	0.956955	26.5457	0.957216	37.1715
		0.111312	9.52968	0.374363	15.7476	0.875292	27.0641	0.957341	26.8046	0.957904	37.1948
		0.113296	9.78466	0.374933	15.772	0.874471	27.115	0.957512	26.9012	0.958592	37.2065
		0.114236	9.73939	0.375047	15.6478	0.876724	27.6164	0.958059	27.2414	0.959308	37.2194
		0.11422	9.57653	0.374849	15.5348	0.874986	27.1725	0.95819	27.2909	0.960032	37.2441
		0.114128	9.5507	0.375251	15.6815	0.875765	27.5728	0.958296	27.3431	0.960752	37.2583
		0.114736	9.76411	0.376102	15.9305	0.877388	27.7452	0.958918	27.6589	0.961428	37.2739
		0.116344	10.12	0.375953	15.8017	0.87568	27.4076	0.959224	27.7607	0.962064	37.2855
		0.118192	10.3686	0.375414	15.6015	0.878451	28.2797	0.959665	27.9325	0.962688	37.2998
		0.119052	10.3154	0.375365	15.585	0.87798	27.8186	0.96079	28.4743	0.963336	37.327
		0.11888	10.0951	0.375163	15.4747	0.877571	27.9303	0.961398	28.6368	0.96398	37.3426
		0.118424	9.86621	0.374524	15.2619	0.880147	28.4945	0.962045	28.8602	0.964632	37.3607
		0.118076	9.72672	0.374596	15.3294	0.878047	27.7063	0.963333	29.3655	0.965296	37.3763
		0.117984	9.71635	0.375084	15.5052	0.878467	28.0214	0.964092	29.5083	0.965984	37.3983
		0.118072	9.80789	0.374543	15.3684	0.881561	28.5143	0.964776	29.6544	0.966652	37.4138
		0.118812	10.147	0.373898	15.2852	0.878051	27.5042	0.965745	29.9186	0.967316	37.4294
		0.120372	10.5746	0.373539	15.2534	0.880431	28.4469	0.966039	29.7694	0.967988	37.454
		0.12184	10.7781	0.372447	14.8814	0.883122	28.7402	0.966282	29.7258	0.968624	37.4696
		0.122016	10.5384	0.370298	14.3482	0.878935	27.6475	0.967253	30.0693	0.969264	37.4864
		0.120884	9.94262	0.369276	14.3363	0.881378	28.6055	0.967565	29.9603	0.969928	37.5097
		0.119144	9.2005	0.369984	14.837	0.883337	28.7013	0.967994	30.0164	0.970596	37.5227
		0.117212	8.47536	0.369378	14.664	0.8798	27.8266	0.969041	30.3962	0.971268	37.5421
		0.115348	7.86024	0.366727	13.9464	0.882502	28.7549	0.969422	30.3235	0.971888	37.5525
		0.113348	7.29686	0.365104	13.7561	0.883369	28.5349	0.969402	30.1055	0.972484	37.5758
		0.111644	6.87826	0.365184	14.0733	0.880873	27.9575	0.9699	30.2502	0.973088	37.5914
		0.110728	6.72014	0.364988	14.1203	0.883598	28.7727	0.969865	30.0415	0.973708	37.6056
		0.11048	6.74347	0.363029	13.5791	0.8823	28.1034	0.969635	29.7845	0.974328	37.6224
		0.110496	6.82642	0.360847	13.2283	0.881182	27.9952	0.969722	29.7231	0.974992	37.6429
		0.110444	6.84067	0.359333	13.1537	0.882965	28.3361	0.969631	29.5566	0.975656	37.6672
		0.110336	6.80309	0.35851	13.2515	0.880753	27.5855	0.969392	29.3128	0.976316	37.6839
		0.110144	6.7331	0.357629	13.2025	0.881478	27.865	0.969376	29.213	0.97698	37.7043
		0.109664	6.57523	0.35719	13.2871	0.882949	27.974	0.969098	28.9606	0.97764	37.7172
		0.108568	6.2893	0.356502	13.2593	0.879835	27.1376	0.969098	28.9077	0.978276	37.7263
		0.106784	5.88802	0.355576	13.0895	0.88231	27.8967	0.969041	28.7874	0.9789	37.7432
		0.104984	5.55883	0.354678	12.9389	0.881878	27.4864	0.96861	28.4505	0.979532	37.7664
		0.103608	5.35666	0.354382	12.9415	0.880188	27.2115	0.968369	28.2793	0.980176	37.7794
		0.102884	5.31518	0.354673	13.1272	0.881247	27.4302	0.967982	28.0244	0.980864	37.7963
		0.102732	5.38776	0.35472	13.2012	0.880512	27.1329	0.967253	27.6094	0.981548	37.8157
		0.102884	5.46682	0.354618	13.2303	0.880845	27.3429	0.966816	27.3973	0.9822	37.8325
		0.103004	5.51218	0.354043	13.151	0.882004	27.4248	0.9663	27.1541	0.982844	37.8468
		0.102988	5.5031	0.353763	13.1913	0.88009	26.9346	0.965584	26.8416	0.983488	37.8649
		0.102852	5.44608	0.35389	13.299	0.882982	27.7036	0.96539	26.8298	0.984124	37.8883
		0.1025	5.32426	0.354222	13.3968	0.882451	27.2378	0.9649	26.6065	0.984756	37.9116
		0.101572	5.09486	0.354567	13.4728	0.880343	26.922	0.964259	26.3561	0.985408	37.9233
		0.100088	4.79846	0.355496	13.6499	0.882537	27.4717	0.963886	26.2471	0.986064	37.9388
		0.098812	4.64846	0.355939	13.7186	0.881476	27.0733	0.963586	26.1777	0.986708	37.9583
		0.098348	4.69498	0.356269	13.7847	0.882455	27.4282	0.963216	26.0746	0.987336	37.9751
		0.098744	4.94722	0.357016	13.9399	0.8834	27.5022	0.962904	25.992	0.98794	37.9971
		0.099736	5.36184	0.358996	14.5041	0.883043	27.3568	0.96278	26.0078	0.988572	38.0127
		0.100836	5.78304	0.360435	14.73	0.884302	27.6046	0.962822	26.097	0.989208	38.0269
		0.101452	5.97096	0.360378	14.4155	0.88351	27.306	0.962357	25.8643	0.989828	38.0438
		0.101616	5.98133	0.359745	14.1433	0.883727	27.4777	0.962029	25.7798	0.990432	38.0632
		0.1017	5.97226	0.360904	14.4519	0.885847	27.8391	0.961951	25.8294	0.99108	38.0788
		0.102112	6.09389	0.362967	14.9025	0.884869	27.4803	0.961531	25.6622	0.991748	38.0982
		0.102992	6.40445	0.363378	14.7624	0.887078	28.2415	0.961551	25.7989	0.992388	38.1125
		0.104204	6.8148	0.362808	14.4341	0.888057	28.0353	0.962016	26.1406	0.993008	38.1306
		0.1056	7.25021	0.36361	14.6119	0.885929	27.6211	0.962316	26.3256	0.99364	38.1449
		0.10712	7.67131	0.365927	15.2587	0.889553	28.8077	0.962408	26.3983	0.994268	38.1643
		0.108572	8.02982	0.367141	15.3849	0.889604	28.3717	0.962818	26.66	0.99492	38.1889
		0.1094	8.16677	0.367124	15.1544	0.886927	27.8305	0.963353	26.9619	0.9956	38.2097
		0.109636	8.13835	0.367478	15.1549	0.891555	29.2093	0.963714	27.1503	0.99632	38.233
		0.1098	8.14742	0.368578	15.3881	0.890357	28.4324	0.964473	27.585	0.997032	38.2524
		0.110736	8.40523	0.369882	15.6008	0.890153	28.5004	0.965388	28.0731	0.997704	38.2719
		0.11234	8.81069	0.36999	15.3768	0.893888	29.4815	0.966214	28.4973	0.99836	38.2861
		0.114384	9.21504	0.369159	15.02	0.892608	28.7991	0.966735	28.6996	0.999008	38.3004
		0.116076	9.46906	0.369022	15.0234	0.892102	28.8202	0.967555	29.0755	0.999672	38.3108
		0.117628	9.71227	0.370269	15.4555	0.893073	28.9134	0.968386	29.3609	1.00033	38.3302
		0.119164	9.94248	0.370635	15.4504	0.891686	28.5883	0.969127	29.5956	1.001	38.3419
		0.120316	10.0394	0.369986	15.159	0.891624	28.548	0.969959	29.877	1.00168	38.3652
		0.120732	9.96293	0.369612	15.0804	0.891927	28.6822	0.970745	30.0937	1.00237	38.3743
		0.120768	9.88646	0.369735	15.1055	0.892924	28.8447	0.971394	30.2582	1.00304	38.3937
		0.121088	9.96422	0.369447	15.013	0.893769	29.0204	0.972094	30.4874	1.00368	38.4144
		0.122052	10.2247	0.368971	14.8807	0.893745	28.9789	0.973037	30.8395	1.00434	38.4248
		0.123752	10.6265	0.368794	14.8583	0.895512	29.4876	0.973682	30.9498	1.005	38.4481
		0.125572	10.9414	0.368461	14.7981	0.895473	29.2278	0.974333	31.1507	1.00566	38.4637
		0.126764	11.0321	0.369282	15.1865	0.895027	29.2285	0.975004	31.3324	1.00636	38.4857
		0.12712	10.9155	0.369978	15.2738	0.896194	29.4306	0.975506	31.3715	1.00708	38.5104
		0.127084	10.7716	0.368012	14.4757	0.895933	29.3388	0.975586	31.1977	1.00779	38.5311
		0.127104	10.7392	0.365398	13.8955	0.89591	29.3024	0.976041	31.3266	1.00846	38.5479
		0.127564	10.8909	0.366259	14.471	0.895822	29.2265	0.976531	31.3959	1.00914	38.5648
		0.128692	11.1888	0.367231	14.7154	0.895184	29.1492	0.976637	31.2724	1.00979	38.5816
		0.12978	11.3443	0.365092	13.9583	0.896694	29.5073	0.977106	31.4184	1.01045	38.605
		0.130048	11.2134	0.362735	13.5156	0.893467	28.6801	0.977567	31.513	1.01113	38.6205
		0.12966	10.9544	0.362641	13.7489	0.894351	29.1598	0.977502	31.318	1.01185	38.6387
		0.129348	10.7988	0.362918	13.9366	0.894961	29.175	0.977914	31.4727	1.01254	38.6555
		0.12916	10.712	0.362237	13.7933	0.893833	29.0052	0.978018	31.4033	1.01322	38.6749
		0.128916	10.6135	0.361461	13.675	0.89432	29.173	0.977996	31.3537	1.01389	38.6905
		0.128376	10.3738	0.36081	13.5891	0.893382	28.9319	0.977957	31.3068	1.01457	38.7099
		0.127708	10.0824	0.359884	13.4015	0.893218	28.9325	0.977933	31.2697	1.01525	38.7203
		0.126572	9.63442	0.358776	13.2369	0.892849	28.9259	0.977867	31.2387	1.01593	38.732
		0.125112	9.07114	0.358096	13.1741	0.892614	28.8704	0.977588	31.0715	1.01663	38.7527
		0.123548	8.53219	0.357402	13.0915	0.892006	28.7726	0.97689	30.6718	1.01738	38.7773
		0.122392	8.19298	0.356765	13.0181	0.891188	28.6234	0.976651	30.5937	1.0181	38.7994
		0.12176	8.0688	0.356592	13.1113	0.891086	28.6491	0.97608	30.2852	1.01877	38.8175
		0.121484	8.02747	0.356812	13.1794	0.891014	28.4807	0.975137	29.7884	1.01944	38.8305
		0.120508	7.75032	0.35672	13.184	0.889057	28.1153	0.974757	29.6636	1.02014	38.8538
		0.11884	7.29427	0.356959	13.2619	0.890145	28.3908	0.974645	29.6867	1.02084	38.868
		0.116876	6.84586	0.357486	13.4278	0.889316	28.1133	0.974171	29.4409	1.02153	38.881
		0.115152	6.51571	0.358561	13.6855	0.889392	28.2606	0.973716	29.2427	1.02229	38.8992
		0.113812	6.31013	0.358886	13.7106	0.89042	28.367	0.973484	29.1554	1.02306	38.9251
		0.112828	6.17054	0.358614	13.5607	0.888412	27.8642	0.972869	28.8528	1.02378	38.9406
		0.11154	5.958	0.358373	13.5361	0.889914	28.2282	0.972198	28.5456	1.02447	38.9601
		0.109628	5.64437	0.359373	13.8955	0.888859	27.7744	0.971816	28.4207	1.02519	38.9795
		0.10748	5.3424	0.360796	14.2272	0.888196	27.8186	0.971247	28.1637	1.0259	38.9951
		0.105468	5.09746	0.361437	14.2568	0.889698	28.0836	0.970555	27.8796	1.02662	39.0132
		0.103972	4.97434	0.361116	14.0388	0.887622	27.4632	0.970171	27.7528	1.02734	39.0326
		0.103236	5.00933	0.361751	14.2021	0.889237	28.0988	0.969359	27.3787	1.02808	39.0495
		0.102988	5.07413	0.363718	14.7327	0.889498	27.8794	0.968806	27.2275	1.02883	39.0637
		0.102532	5.00414	0.364765	14.878	0.887071	27.3621	0.968737	27.3193	1.02956	39.0832
		0.10124	4.75061	0.364408	14.5702	0.889463	27.9685	0.968512	27.2579	1.03027	39.1013
		0.099208	4.41542	0.364902	14.6408	0.889547	27.8543	0.968355	27.238	1.03099	39.1234
		0.096908	4.12666	0.366349	14.9427	0.889982	27.9553	0.968676	27.4463	1.0317	39.135
		0.095012	3.9504	0.367918	15.2526	0.891196	28.1185	0.968457	27.2618	1.03242	39.1558
		0.093948	3.9491	0.368741	15.2586	0.8921	28.2415	0.968398	27.2056	1.03316	39.1752
		0.093784	4.12666	0.369376	15.2784	0.892855	28.3161	0.968688	27.3569	1.03395	39.1933
		0.09444	4.52414	0.369878	15.2922	0.89309	28.2566	0.968969	27.4792	1.03471	39.2127
		0.095452	4.99152	0.370065	15.2031	0.89359	28.3954	0.968984	27.4197	1.03544	39.2257
		0.096436	5.4085	0.370247	15.1779	0.895935	28.7277	0.969506	27.6815	1.03618	39.2463
		0.09686	5.55365	0.371237	15.4646	0.894008	28.1245	0.969682	27.6703	1.03692	39.263
		0.096616	5.4409	0.372433	15.7401	0.896571	28.8512	0.970137	27.8513	1.03764	39.2784
		0.095664	5.04322	0.373143	15.8267	0.896514	28.4779	0.970478	27.9299	1.03836	39.2925
		0.094496	4.58621	0.374673	16.1947	0.896045	28.47	0.97071	27.9537	1.03911	39.3077
		0.093304	4.18493	0.376151	16.4445	0.898524	28.978	0.970847	27.92	1.03991	39.3245
		0.092132	3.88301	0.376149	16.1485	0.897729	28.5499	0.97162	28.2866	1.04073	39.3464
		0.090904	3.67694	0.375051	15.7249	0.898614	28.91	0.972039	28.3944	1.04151	39.371
		0.089956	3.60955	0.375969	16.0824	0.901967	29.3599	0.972527	28.5616	1.04226	39.3917
		0.089624	3.7223	0.37828	16.6942	0.898492	28.3927	0.973731	29.137	1.04299	39.4086
		0.090252	4.08893	0.378331	16.4616	0.90088	29.282	0.974759	29.5222	1.04373	39.4358
		0.091584	4.69109	0.37711	15.9523	0.902424	29.249	0.975278	29.612	1.04449	39.4526
		0.093636	5.48107	0.37698	15.9787	0.899855	28.7231	0.976155	29.9318	1.04528	39.4747
		0.096044	6.30086	0.377651	16.2483	0.902457	29.5383	0.977071	30.2377	1.04612	39.4889
		0.098244	6.93542	0.377641	16.2007	0.901898	29.056	0.977939	30.4656	1.04694	39.5019
		0.099592	7.26835	0.376935	15.941	0.900612	28.8876	0.978629	30.6091	1.0477	39.5136
		0.100032	7.29298	0.375447	15.6596	0.902904	29.4603	0.979535	30.8799	1.04845	39.5343
		0.100052	7.20874	0.376029	16.0323	0.900429	28.6768	0.980488	31.1012	1.0492	39.546
		0.09994	7.11024	0.377316	16.3381	0.900647	28.9074	0.981129	31.1205	1.04997	39.5654
		0.100028	7.12709	0.376216	15.801	0.900973	28.8896	0.981608	31.1476	1.05074	39.5835
		0.10018	7.17115	0.373492	15.0743	0.899582	28.5738	0.982622	31.4422	1.05155	39.6004
		0.100684	7.34093	0.373416	15.2652	0.898573	28.3722	0.982961	31.2989	1.0524	39.6185
		0.102092	7.7269	0.374553	15.667	0.897639	28.2024	0.983302	31.285	1.0532	39.638
		0.104312	8.22926	0.37372	15.3572	0.897147	28.1509	0.984014	31.5089	1.05398	39.6535
		0.10658	8.64091	0.371804	14.8233	0.897078	28.0816	0.984365	31.4791	1.05474	39.6768
		0.108388	8.90659	0.371022	14.7142	0.89459	27.5953	0.984418	31.3648	1.05551	39.6937
		0.109708	9.05045	0.370992	14.8332	0.896629	28.2276	0.98501	31.5802	1.05624	39.7105
		0.110264	8.98565	0.370912	14.8173	0.895351	27.7348	0.984931	31.3708	1.05698	39.7339
		0.11028	8.81069	0.370269	14.6382	0.893249	27.6165	0.984845	31.2043	1.05779	39.7546
		0.110184	8.69405	0.369182	14.4373	0.894259	27.8854	0.984751	31.0642	1.05862	39.7728
		0.110376	8.71867	0.369235	14.5681	0.891369	27.1019	0.984549	30.8687	1.05944	39.7896
		0.11072	8.8068	0.370243	14.9058	0.891161	27.4203	0.984153	30.5958	1.06021	39.809
		0.111688	9.08544	0.369633	14.6672	0.891141	27.3615	0.983971	30.4966	1.061	39.8272
		0.113388	9.42888	0.3672	13.9728	0.888863	26.9552	0.983727	30.3579	1.06178	39.8492
		0.114716	9.54811	0.36649	13.9239	0.890857	27.596	0.983271	30.1082	1.06254	39.8635
		0.114684	9.22282	0.368212	14.6203	0.889527	27.1659	0.982784	29.8631	1.06336	39.8816
		0.113352	8.51818	0.368922	14.689	0.887408	26.9736	0.982339	29.6569	1.06418	39.8985
		0.111192	7.60238	0.367837	14.2232	0.887882	27.1857	0.981659	29.3153	1.06503	39.9179
		0.108932	6.80597	0.367235	14.134	0.884094	26.2237	0.980759	28.8832	1.06585	39.9348
		0.107284	6.31526	0.36822	14.5463	0.884155	26.6823	0.980069	28.6024	1.06663	39.949
		0.106732	6.23904	0.369251	14.7385	0.884406	26.6968	0.979247	28.2675	1.0674	39.962
		0.107208	6.50294	0.369214	14.6401	0.881194	26.0903	0.978239	27.8677	1.06817	39.9788
		0.108336	6.98328	0.368498	14.43	0.884261	27.0007	0.977165	27.505	1.06893	39.9905
		0.109476	7.4148	0.369506	14.8278	0.883508	26.7232	0.976194	27.2679	1.06971	40.0047
		0.110048	7.5755	0.371943	15.4475	0.881841	26.6135	0.975176	26.9876	1.07049	40.0099
		0.110028	7.48738	0.372624	15.4932	0.883639	27.0634	0.97401	26.6718	1.07121	40.0138
		0.109516	7.20614	0.371916	15.1041	0.881759	26.5983	0.973076	26.5245	1.07188	40.0138
		0.108504	6.72566	0.372061	15.1682	0.882267	26.9663	0.972151	26.3487	1.07252	40.019
		0.107092	6.16627	0.374	15.7113	0.883	27.0416	0.971151	26.14	1.07314	40.0151
		0.105412	5.66251	0.375139	15.885	0.881214	26.7363	0.970347	26.0455	1.07377	40.0203
		0.103128	5.17008	0.375133	15.6082	0.882698	27.2352	0.969437	25.8663	1.07439	40.0216
		0.101028	4.79467	0.374955	15.4264	0.881424	26.8104	0.968337	25.6774	1.07502	40.0203
		0.099964	4.69234	0.376055	15.6259	0.880914	26.9095	0.968041	25.9192	1.07567	40.0177
		0.099724	4.73486	0.377727	15.9522	0.882616	27.2682	0.967459	25.8875	1.07629	40.0177
		0.099712	4.77346	0.378439	15.9608	0.88	26.5289	0.966802	25.8194	1.0769	40.0099
		0.099412	4.6896	0.378241	15.7019	0.881676	27.2074	0.966473	25.8908	1.07749	40.0125
		0.098512	4.47365	0.378882	15.7786	0.883267	27.2965	0.965786	25.6973	1.07804	40.0125
		0.097068	4.18757	0.380196	16.0759	0.879965	26.55	0.965033	25.5308	1.07861	40.0112
		0.095524	3.94781	0.38161	16.2602	0.883049	27.4479	0.964512	25.5116	1.07922	40.0177
		0.094124	3.73915	0.381708	15.885	0.883469	27.1816	0.963835	25.402	1.07986	40.0281
		0.092944	3.5603	0.381573	15.6986	0.881896	26.9775	0.963198	25.3353	1.08051	40.0475
		0.091904	3.3983	0.382861	16.0481	0.884851	27.6778	0.963259	25.5903	1.08113	40.0592
		0.090792	3.24667	0.385573	16.7135	0.883582	27.2431	0.962712	25.4053	1.08175	40.0786
		0.089848	3.18965	0.385861	16.5568	0.884169	27.5271	0.962408	25.4007	1.0824	40.098
		0.0893	3.22464	0.384971	16.2113	0.885396	27.658	0.962629	25.6908	1.0831	40.1149
		0.088968	3.23246	0.385396	16.4082	0.884737	27.4426	0.962616	25.7819	1.08378	40.1292
		0.088192	3.0852	0.387573	17.0901	0.886286	27.8602	0.962627	25.8809	1.0845	40.1486
		0.086968	2.88221	0.388182	17.1	0.886351	27.6363	0.9629	26.1294	1.08522	40.1641
		0.085732	2.7191	0.3872	16.6164	0.886653	27.7347	0.963365	26.471	1.08596	40.1823
		0.084588	2.59339	0.386686	16.5351	0.887908	27.9719	0.963631	26.6534	1.08668	40.203
		0.083712	2.53507	0.387551	16.8556	0.887704	27.7948	0.964441	27.1615	1.08738	40.2147
		0.083284	2.58043	0.388324	17.0029	0.888645	28.0122	0.964867	27.3875	1.08806	40.2315
		0.08328	2.70614	0.387967	16.7796	0.889314	27.8675	0.965651	27.8261	1.08873	40.2562
		0.083376	2.82149	0.386804	16.4393	0.887765	27.561	0.966014	27.9622	1.08945	40.2769
		0.083636	2.97662	0.3864	16.4036	0.890647	28.1232	0.966529	28.216	1.0902	40.295
		0.084168	3.25219	0.386435	16.4749	0.888237	27.2934	0.967316	28.5489	1.09096	40.3067
		0.084836	3.57715	0.385914	16.2959	0.888996	27.6145	0.968035	28.7914	1.09168	40.3261
		0.085136	3.71971	0.383941	15.6623	0.890145	27.7605	0.968363	28.8132	1.09236	40.3404
		0.085004	3.68731	0.382533	15.4482	0.889941	27.5927	0.969129	29.1296	1.09304	40.3585
		0.084792	3.6251	0.382786	15.7581	0.889971	27.5629	0.969871	29.3918	1.09374	40.3741
		0.08466	3.60178	0.383137	15.9226	0.889808	27.4559	0.970398	29.5048	1.09443	40.3935
		0.084592	3.61733	0.381747	15.4786	0.889871	27.4275	0.970847	29.5809	1.09512	40.4117
		0.084528	3.64714	0.379745	15.0723	0.890231	27.4242	0.971416	29.7263	1.09585	40.4389
		0.084512	3.69898	0.379088	15.1562	0.890027	27.3792	0.972218	29.9384	1.0966	40.4557
		0.084608	3.79747	0.379904	15.6042	0.890629	27.5121	0.972576	29.844	1.09733	40.4752
		0.084916	3.97114	0.378412	15.1027	0.890531	27.4215	0.972751	29.7753	1.09804	40.4972
		0.085716	4.33118	0.374763	14.2385	0.890406	27.4268	0.973482	30.0574	1.09871	40.5102
		0.087148	4.89835	0.373837	14.3937	0.89072	27.37	0.97421	30.2299	1.09936	40.5296
		0.089364	5.65968	0.375978	15.2612	0.888524	26.7886	0.974214	30.0158	1.10004	40.5504
		0.092184	6.48994	0.37531	14.878	0.889878	27.1479	0.974561	30.0726	1.10078	40.5698
		0.09522	7.19318	0.372265	14.1189	0.888996	26.6901	0.97478	30.0183	1.10155	40.5828
		0.0973	7.5768	0.371492	14.2319	0.887329	26.5401	0.975002	29.9899	1.1023	40.6022
		0.098072	7.64808	0.372927	14.8608	0.889796	27.0911	0.974953	29.8637	1.10303	40.6281
		0.0981	7.58976	0.372161	14.6223	0.8882	26.6102	0.975271	29.976	1.10371	40.6398
		0.097956	7.51978	0.369659	14.0231	0.889406	27.1268	0.975906	30.2171	1.1044	40.6527
		0.098028	7.56125	0.368753	13.9967	0.88998	27.1116	0.976237	30.235	1.1051	40.6722
		0.098812	7.80072	0.370341	14.662	0.886747	26.2732	0.976341	30.1068	1.10577	40.6968
		0.100396	8.16571	0.370967	14.7485	0.888802	27.025	0.976714	30.1624	1.10647	40.7136
		0.102104	8.43101	0.369367	14.1592	0.888108	26.5315	0.976863	30.0671	1.10721	40.7279
		0.103108	8.48798	0.368106	13.9563	0.886133	26.328	0.976555	29.7488	1.10795	40.7512
		0.103352	8.42318	0.369167	14.4723	0.888759	26.9464	0.976394	29.5466	1.10863	40.7772
		0.103908	8.53853	0.370318	14.6896	0.887402	26.4806	0.976041	29.2399	1.10928	40.7901
		0.105464	8.85475	0.368937	14.0851	0.88668	26.5375	0.97549	28.8343	1.10992	40.8005
		0.107372	9.12562	0.367547	13.805	0.887751	26.7786	0.974933	28.4644	1.11058	40.8251
		0.108336	9.10488	0.368716	14.3032	0.884902	26.1014	0.974478	28.1558	1.11126	40.8497
		0.108432	8.9675	0.371186	14.8661	0.886869	26.7727	0.973998	27.8638	1.11199	40.8677
		0.108388	8.89752	0.371055	14.5946	0.886773	26.6333	0.973649	27.6716	1.11273	40.878
		0.108352	8.85864	0.369922	14.2603	0.885767	26.5778	0.973267	27.4667	1.11344	40.8859
		0.108336	8.84179	0.370524	14.471	0.888129	27.1565	0.97319	27.4383	1.11413	40.91
		0.108396	8.86253	0.372455	14.991	0.886792	26.6868	0.972771	27.2017	1.11479	40.9266
		0.109024	9.05952	0.373159	15.0783	0.886445	26.9663	0.972359	27.0181	1.11545	40.9432
		0.109852	9.24355	0.373267	14.9785	0.888898	27.4255	0.972365	27.0816	1.11611	40.9548
		0.11036	9.25262	0.373594	15.0129	0.885829	26.6975	0.972447	27.1384	1.11679	40.9729
		0.110224	9.09581	0.37528	15.5124	0.887853	27.4454	0.971894	26.822	1.11749	40.9976
		0.110076	8.9999	0.3769	15.7872	0.88821	27.4143	0.971739	26.7672	1.11821	41.0261
		0.11004	8.95714	0.377047	15.5665	0.887745	27.3812	0.972104	26.9852	1.1189	41.0481
		0.11	8.90141	0.376198	15.2303	0.890065	28.0234	0.971845	26.781	1.11957	41.0663
		0.10994	8.8392	0.37719	15.5375	0.888916	27.4955	0.971443	26.5405	1.12022	41.0883
		0.109832	8.7433	0.379516	16.0561	0.888445	27.6944	0.971569	26.6448	1.12086	41.0961
		0.109296	8.45587	0.380316	16.0819	0.892065	28.3623	0.971598	26.6415	1.12152	41.1168
		0.108176	7.91981	0.379357	15.5804	0.888112	27.2525	0.971469	26.5496	1.12222	41.1375
		0.10686	7.35518	0.379412	15.6312	0.888902	27.7995	0.971333	26.4664	1.12295	41.1596
		0.10584	6.98842	0.38162	16.2582	0.892276	28.3327	0.971741	26.7168	1.12364	41.1712
		0.105368	6.82771	0.382559	16.354	0.888327	27.2664	0.971945	26.7855	1.12428	41.1881
		0.105308	6.81475	0.381833	15.8665	0.890331	28.077	0.972182	26.9157	1.12492	41.2075
		0.105192	6.75514	0.381118	15.6828	0.89162	28.0678	0.972659	27.174	1.12556	41.2244
		0.104444	6.4692	0.382651	16.2094	0.889002	27.5141	0.973078	27.3893	1.12622	41.2386
		0.103012	6.01867	0.384114	16.463	0.891531	28.4437	0.973465	27.5855	1.12688	41.2542
		0.101476	5.61067	0.38359	16.0627	0.891882	28.2567	0.974494	28.1373	1.12754	41.2723
		0.100212	5.31907	0.381824	15.5697	0.890837	28.2104	0.975396	28.539	1.12823	41.2892
		0.099288	5.13763	0.382222	15.8148	0.895	29.3785	0.975804	28.6507	1.1289	41.306
		0.098824	5.07283	0.383929	16.235	0.89372	28.6299	0.97699	29.2394	1.12956	41.3216
		0.098748	5.09098	0.383582	15.9879	0.892208	28.5156	0.977886	29.5631	1.13018	41.3449
		0.098704	5.07672	0.3812	15.2843	0.895235	29.0792	0.978359	29.6932	1.1308	41.3656
		0.09816	4.91621	0.380602	15.2857	0.891324	27.9858	0.978947	29.9271	1.13142	41.3916
		0.097156	4.66267	0.382096	15.84	0.891435	28.2784	0.97982	30.3135	1.13209	41.4071
		0.096124	4.47912	0.381818	15.6578	0.894716	28.9536	0.980318	30.4424	1.13278	41.424
		0.09564	4.45195	0.378951	14.7698	0.89129	27.9771	0.980743	30.5938	1.13346	41.4447
		0.095604	4.51286	0.377571	14.6093	0.893516	28.8882	0.981653	30.8858	1.13412	41.4628
		0.095552	4.49861	0.379078	15.3089	0.896198	29.1161	0.982447	31.0081	1.13474	41.4823
		0.095208	4.39363	0.379088	15.2368	0.892037	28.1047	0.982961	31.0108	1.13536	41.5043
		0.094904	4.33661	0.375869	14.3065	0.894053	28.9305	0.983796	31.2235	1.136	41.5134
		0.09498	4.40789	0.373657	14.0151	0.8967	29.1201	0.984535	31.3529	1.13665	41.5315
		0.095232	4.50768	0.374431	14.6216	0.89192	27.882	0.984971	31.3946	1.1373	41.551
		0.095548	4.63166	0.374543	14.6758	0.8946	28.9305	0.985604	31.6185	1.138	41.5795
		0.096252	4.91112	0.37202	13.9556	0.896831	29.0045	0.986465	31.8531	1.13866	41.5976
		0.097324	5.3424	0.370118	13.6735	0.891712	27.7063	0.986594	31.6265	1.1393	41.6106
		0.098688	5.85427	0.369863	13.8176	0.893627	28.5969	0.98651	31.3186	1.13995	41.6222
		0.100032	6.33202	0.369855	13.961	0.895578	28.6854	0.986678	31.3021	1.14059	41.6404
		0.101396	6.76829	0.368855	13.8157	0.890716	27.4466	0.986939	31.2915	1.1412	41.6598
		0.102612	7.12838	0.368055	13.7385	0.892782	28.1628	0.986692	31.0946	1.14185	41.6793
		0.103532	7.36166	0.367031	13.6314	0.89358	27.997	0.987341	31.4574	1.14253	41.7
		0.103956	7.4148	0.366596	13.8078	0.891406	27.5345	0.98788	31.6623	1.14322	41.7168
		0.104012	7.35907	0.366851	13.8692	0.892814	27.8516	0.987494	31.3008	1.14392	41.7428
		0.10404	7.33056	0.364855	13.1978	0.891876	27.5226	0.98731	31.1701	1.14454	41.7583
		0.10432	7.41739	0.362843	12.8808	0.891002	27.5451	0.987251	31.1165	1.14515	41.7752
		0.10514	7.65586	0.363196	13.2289	0.893365	27.9646	0.986412	30.644	1.14577	41.792
		0.106528	8.02474	0.364818	13.6862	0.889988	26.893	0.986039	30.5482	1.1464	41.8153
		0.108044	8.32622	0.363804	13.3493	0.891018	27.5418	0.986	30.6421	1.14703	41.8413
		0.109032	8.46725	0.361955	13.0136	0.892806	27.5735	0.985402	30.3553	1.1477	41.8633
		0.10962	8.55278	0.36149	13.0592	0.889576	26.7959	0.984871	30.1452	1.14839	41.8737
		0.110792	8.82494	0.362843	13.6148	0.891578	27.4255	0.984673	30.1346	1.14906	41.8918
		0.112844	9.28368	0.363171	13.552	0.891751	27.3601	0.984124	29.8908	1.14969	41.9061
		0.115104	9.6876	0.361255	12.9719	0.891994	27.3799	0.983508	29.6159	1.15032	41.9229
		0.117164	9.99168	0.360641	12.929	0.892973	27.5609	0.983061	29.4686	1.15094	41.9372
		0.11858	10.0822	0.362008	13.521	0.893567	27.6098	0.982282	29.1191	1.15159	41.9592
		0.11904	9.97982	0.363712	13.8381	0.894133	27.6752	0.98129	28.7056	1.15226	41.9812
		0.118936	9.82574	0.363694	13.7865	0.894694	27.7789	0.980616	28.4855	1.15296	41.9942
		0.119048	9.85685	0.363863	13.8288	0.895216	27.8622	0.979588	28.0778	1.15366	42.0084
		0.11998	10.1224	0.365122	14.1974	0.897257	28.2296	0.978524	27.7243	1.15432	42.0279
		0.121688	10.4619	0.367159	14.6315	0.895665	27.7076	0.978041	27.6939	1.15498	42.0486
		0.123168	10.6019	0.367649	14.683	0.897345	28.3545	0.977298	27.456	1.1556	42.0603
		0.12368	10.5228	0.367916	14.6659	0.900173	28.6028	0.976216	27.0788	1.15621	42.0797
		0.123908	10.5176	0.368908	14.8305	0.896002	27.5874	0.975747	27.0683	1.15687	42.0979
		0.125076	10.7833	0.36982	14.8966	0.898739	28.5123	0.975371	27.0042	1.15755	42.1225
		0.126908	11.1216	0.370292	14.9145	0.899043	28.2606	0.97438	26.6098	1.15823	42.1419
		0.128172	11.2045	0.370951	14.9561	0.89908	28.3002	0.973876	26.5748	1.15892	42.1549
		0.128356	11.0295	0.370678	14.7249	0.901943	29.1082	0.973459	26.512	1.15957	42.1756
		0.127856	10.7405	0.370792	14.7678	0.902155	28.7257	0.97292	26.3614	1.16022	42.1977
		0.127388	10.5384	0.373153	15.4952	0.900463	28.5084	0.972569	26.3316	1.16086	42.2158
		0.12718	10.4787	0.374561	15.6703	0.90562	29.8125	0.972484	26.3957	1.16153	42.2391
		0.12718	10.528	0.373724	15.108	0.903124	28.7799	0.972563	26.4737	1.16221	42.2612
		0.12728	10.6174	0.373218	14.958	0.901149	28.5843	0.972606	26.5061	1.16292	42.2806
		0.127936	10.9322	0.374947	15.4825	0.906522	29.9948	0.97259	26.4875	1.1636	42.2949
		0.129204	11.3127	0.376682	15.7719	0.904992	29.0554	0.9729	26.666	1.16428	42.3117
		0.130096	11.4241	0.376439	15.4217	0.903555	28.7568	0.972937	26.6389	1.16491	42.3234
		0.129972	11.1796	0.375461	15.1225	0.905812	29.2397	0.972582	26.4096	1.16556	42.3454
		0.12932	10.852	0.37671	15.569	0.903294	28.3887	0.972629	26.4618	1.1662	42.3674
		0.128432	10.48	0.379135	16.1227	0.902731	28.5123	0.972927	26.6309	1.16684	42.3869
		0.127144	9.96077	0.378365	15.5922	0.905282	29.0706	0.97271	26.4709	1.16755	42.4089
		0.125852	9.48432	0.375871	14.878	0.903431	28.6081	0.973186	26.7471	1.16828	42.427
		0.125076	9.23707	0.376265	15.2025	0.906053	29.5754	0.97412	27.2426	1.16899	42.4412
		0.124784	9.18005	0.378369	15.7773	0.908359	29.7637	0.974586	27.3906	1.16967	42.4553
		0.12458	9.14894	0.378345	15.6016	0.904384	28.7825	0.975184	27.6258	1.17033	42.4759
		0.124048	8.99083	0.377182	15.188	0.906798	29.6441	0.976212	28.0884	1.17099	42.4874
		0.12278	8.5763	0.377	15.1992	0.904567	28.7548	0.976606	28.1473	1.17166	42.5028
		0.120872	7.98581	0.378073	15.5362	0.902804	28.5659	0.97728	28.3991	1.17234	42.5246
		0.118996	7.47826	0.377931	15.3782	0.905302	29.2728	0.978216	28.7783	1.17306	42.5555
		0.117108	7.03507	0.37598	14.664	0.903892	28.7364	0.978692	28.8656	1.1738	42.5736
		0.11536	6.67608	0.374312	14.3733	0.903202	28.85	0.979361	29.1047	1.17454	42.5879
		0.114004	6.4237	0.374833	14.7313	0.903947	28.9227	0.980308	29.4502	1.17524	42.6047
		0.11268	6.19997	0.375127	14.8364	0.900406	28.1199	0.98092	29.5856	1.17593	42.6216
		0.11136	5.99947	0.373747	14.4188	0.901261	28.6768	0.981676	29.8286	1.17662	42.6462
		0.110624	5.9593	0.371496	13.9841	0.901451	28.5295	0.982555	30.1207	1.17732	42.6682
		0.110228	5.93338	0.37158	14.3072	0.8999	28.3564	0.983214	30.2158	1.17807	42.6812
		0.1092	5.7312	0.372753	14.7148	0.902671	29.0806	0.984004	30.4345	1.17882	42.7071
		0.107428	5.40202	0.372084	14.4175	0.900849	28.5686	0.984808	30.6031	1.17956	42.7265
		0.105624	5.15448	0.369445	13.741	0.899996	28.5811	0.98541	30.6546	1.18026	42.7356
		0.10452	5.10394	0.368682	13.7588	0.901949	28.9709	0.986041	30.7385	1.18094	42.7486
		0.10416	5.18299	0.369563	14.148	0.8982	28.1504	0.986447	30.755	1.18163	42.7615
		0.104252	5.30222	0.369347	13.9908	0.899524	28.8083	0.98691	30.8118	1.18236	42.7745
		0.104488	5.42794	0.367014	13.2997	0.90029	28.6346	0.987018	30.7074	1.1831	42.7952
		0.105084	5.70528	0.365939	13.1716	0.896116	27.8365	0.987263	30.7035	1.18386	42.8224
		0.106004	6.1248	0.365863	13.2648	0.898735	28.8076	0.987127	30.4966	1.18462	42.8406
		0.106676	6.38227	0.365937	13.3295	0.898084	28.2646	0.987039	30.3394	1.18536	42.8574
		0.106752	6.37594	0.364963	13.0308	0.895376	27.8906	0.986737	30.0791	1.18606	42.8743
		0.106544	6.25459	0.363592	12.8002	0.897614	28.5103	0.986698	30.0131	1.18676	42.8989
		0.106284	6.11741	0.362994	12.7751	0.895608	27.8827	0.98642	29.8022	1.18746	42.9222
		0.105656	5.81155	0.363953	13.2461	0.894959	27.9871	0.986061	29.5565	1.18819	42.9443
		0.104648	5.40331	0.364141	13.2435	0.896343	28.3022	0.985753	29.3701	1.18896	42.9637
		0.103628	5.06246	0.363157	13.0136	0.894176	27.8015	0.985141	29.0088	1.18974	42.9844
		0.102988	4.9549	0.362671	12.9812	0.89572	28.2897	0.984127	28.4663	1.1905	43.0039
		0.10292	5.04302	0.363008	13.194	0.895512	27.9957	0.98348	28.1935	1.19124	43.0181
		0.103528	5.33722	0.364122	13.4484	0.893469	27.5974	0.983094	28.0706	1.19195	43.0376
		0.104636	5.7959	0.36428	13.3994	0.895253	28.036	0.982088	27.61	1.19266	43.0648
		0.106052	6.34882	0.364257	13.3538	0.893398	27.3403	0.981206	27.3022	1.19339	43.0868
		0.107496	6.86026	0.365341	13.6484	0.893498	27.7037	0.980367	27.067	1.19414	43.105
		0.108988	7.33834	0.368065	14.4121	0.89522	28.0116	0.979578	26.8694	1.19493	43.1218
		0.11042	7.76842	0.369053	14.5204	0.893939	27.6878	0.978514	26.5219	1.19576	43.1374
		0.111732	8.12563	0.368388	14.1689	0.895353	28.0149	0.977692	26.3171	1.19657	43.1581
		0.113192	8.47248	0.368147	14.1399	0.895488	27.894	0.976865	26.1029	1.19732	43.1801
		0.114204	8.63962	0.37002	14.7504	0.89491	27.7963	0.976018	25.8689	1.19804	43.1918
		0.11468	8.65776	0.371796	15.0841	0.897627	28.3149	0.974937	25.5174	1.1988	43.1996
		0.114988	8.68886	0.371882	14.8853	0.895345	27.5604	0.9742	25.3839	1.19958	43.2177
		0.115992	8.95454	0.371439	14.6819	0.896945	28.2032	0.97339	25.22	1.20038	43.2423
		0.117288	9.24226	0.372816	15.0637	0.899659	28.4919	0.972641	25.203	1.20119	43.2553
		0.11822	9.37704	0.375161	15.5792	0.8981	28.0459	0.972445	25.4448	1.20201	43.2708
		0.118768	9.42629	0.376002	15.5765	0.900912	28.9034	0.971804	25.3762	1.20281	43.289
		0.11988	9.66298	0.375198	15.1246	0.902949	28.8684	0.970947	25.2429	1.20355	43.3123
		0.121736	10.0215	0.375443	15.1992	0.899647	28.0657	0.970684	25.4318	1.20428	43.3305
		0.123252	10.182	0.377739	15.8685	0.903878	29.2939	0.970676	25.6089	1.20502	43.3499
		0.12384	10.1133	0.379022	16.0276	0.902731	28.4899	0.970049	25.404	1.20582	43.3629
		0.123712	9.94478	0.378188	15.4793	0.900845	28.1833	0.969608	25.334	1.20665	43.3849
		0.123644	9.86314	0.37781	15.4211	0.905184	29.3395	0.969724	25.5645	1.20748	43.4004
		0.12372	9.86573	0.38011	16.1624	0.905127	28.8162	0.969571	25.5857	1.2083	43.4212
		0.12412	9.99144	0.381837	16.4484	0.903563	28.5427	0.969043	25.3966	1.20908	43.4445
		0.125168	10.296	0.38121	16.0164	0.907702	29.3804	0.968933	25.4839	1.20983	43.4614
		0.126516	10.5811	0.380202	15.7507	0.9051	28.3723	0.969292	25.8327	1.21062	43.486
		0.127244	10.6122	0.381422	16.2158	0.905549	28.6584	0.969137	25.8314	1.21143	43.5041
		0.127236	10.4554	0.382892	16.5607	0.909022	29.3355	0.96942	26.1089	1.21226	43.5184
		0.127144	10.3465	0.382671	16.3038	0.906259	28.47	0.969963	26.5186	1.21312	43.5352
		0.127076	10.2688	0.381222	15.7785	0.907835	29.1221	0.97021	26.7201	1.21396	43.5573
		0.127	10.2053	0.381069	15.7858	0.910002	29.2589	0.970508	26.9685	1.21478	43.5806
		0.126896	10.1172	0.381814	15.9952	0.906363	28.3946	0.970967	27.3028	1.21556	43.5948
		0.126816	10.0588	0.382231	16.0388	0.908478	29.0718	0.971359	27.5393	1.21633	43.6104
		0.12682	10.0446	0.382247	16.0091	0.908718	28.6622	0.971669	27.7244	1.21713	43.635
		0.126772	10.0005	0.381976	15.9477	0.906271	28.2466	0.972465	28.1758	1.21795	43.6532
		0.126628	9.90202	0.38192	15.984	0.909859	29.2812	0.973037	28.4268	1.21879	43.6635
		0.126428	9.78581	0.382112	16.0527	0.908239	28.5492	0.973692	28.7307	1.21964	43.6856
		0.125964	9.57763	0.381429	15.8103	0.907212	28.6253	0.974424	29.0438	1.22048	43.705
		0.125024	9.15802	0.379769	15.3042	0.908365	28.8624	0.975153	29.3075	1.22129	43.7244
		0.12364	8.60477	0.378845	15.2045	0.906869	28.4945	0.9755	29.3708	1.22205	43.7413
		0.122124	8.05834	0.379702	15.6372	0.906329	28.3445	0.976169	29.6219	1.22283	43.7607
		0.120808	7.6415	0.380029	15.6664	0.905763	28.1179	0.976682	29.7547	1.22367	43.7776
		0.119972	7.4148	0.378237	15.0176	0.90251	27.4705	0.977049	29.797	1.22454	43.797
		0.119064	7.19837	0.375914	14.5716	0.905188	28.2547	0.977549	29.9542	1.2254	43.8113
		0.117712	6.85238	0.375967	14.8629	0.902182	27.2221	0.97851	30.2278	1.22625	43.8372
		0.11586	6.43685	0.377094	15.182	0.900445	27.2783	0.979078	30.2297	1.22712	43.8579
		0.113948	6.0576	0.376616	14.9785	0.902645	27.6892	0.97961	30.2396	1.22794	43.8748
		0.112296	5.77267	0.375739	14.771	0.899988	26.9241	0.980322	30.4081	1.22871	43.8929
		0.111096	5.62363	0.375851	14.8332	0.899427	27.1818	0.981139	30.6003	1.2295	43.9163
		0.110444	5.60678	0.376361	14.9726	0.900159	27.3	0.981551	30.6149	1.23034	43.9279
		0.110172	5.64696	0.375971	14.8437	0.897294	26.6928	0.982129	30.7834	1.2312	43.9409
		0.109556	5.53939	0.373963	14.1936	0.899114	27.36	0.982684	30.8977	1.23203	43.9642
		0.1082	5.26205	0.372296	13.8823	0.898333	27.033	0.983022	30.9242	1.23283	43.9836
		0.106324	4.93171	0.371949	13.9755	0.896267	26.7998	0.983049	30.7756	1.23361	43.9966
		0.104636	4.69114	0.372596	14.2252	0.897916	27.3251	0.983031	30.6943	1.2344	44.0199
		0.103072	4.49198	0.372502	14.167	0.895535	26.6809	0.983231	30.7359	1.2352	44.0406
		0.10156	4.32365	0.371843	14.0276	0.895122	27.0172	0.983008	30.5047	1.23603	44.0691
		0.100336	4.24848	0.372035	14.1882	0.896016	27.177	0.982657	30.2225	1.23687	44.0884
		0.099652	4.27181	0.374033	14.8482	0.8922	26.3076	0.982498	30.0726	1.23775	44.1077
		0.09922	4.27829	0.374671	14.8905	0.894457	27.1665	0.982231	29.8289	1.23862	44.1178
		0.098172	4.11629	0.373278	14.3428	0.895327	27.1406	0.981678	29.4232	1.23946	44.1344
		0.096548	3.89078	0.372592	14.2589	0.891384	26.3597	0.981371	29.2123	1.24025	44.1588
		0.094944	3.74174	0.373869	14.7531	0.894998	27.3996	0.98122	29.0644	1.24102	44.1794
		0.093952	3.72101	0.37539	15.0287	0.894022	26.9213	0.98078	28.7485	1.24183	44.1989
		0.093512	3.77414	0.375971	15.0485	0.891906	26.7528	0.980469	28.5489	1.24267	44.217
		0.093336	3.84672	0.376416	15.0604	0.893682	27.2688	0.98031	28.4286	1.24353	44.2287
		0.093304	3.91022	0.376749	15.0519	0.891888	26.768	0.980057	28.2332	1.24439	44.2481
		0.093168	3.94003	0.376588	14.9191	0.891686	27.0481	0.979565	27.9154	1.24524	44.2676
		0.09296	3.9193	0.376494	14.8827	0.892869	27.2311	0.979371	27.8169	1.24604	44.2883
		0.092492	3.81173	0.377059	15.0948	0.890369	26.6676	0.978929	27.5335	1.2468	44.3052
		0.091564	3.60696	0.378218	15.3862	0.892443	27.3289	0.978467	27.2737	1.24758	44.3233
		0.090384	3.42422	0.379212	15.5442	0.892349	27.2213	0.978184	27.1276	1.2484	44.3414
		0.08968	3.42682	0.380978	15.9069	0.891869	27.2787	0.978008	27.0543	1.24925	44.357
		0.089568	3.5603	0.382084	16.0647	0.894416	27.8661	0.977939	27.0067	1.25008	44.3751
		0.090012	3.84931	0.381488	15.5401	0.893	27.3977	0.977769	26.899	1.25094	44.3946
		0.090816	4.2419	0.380873	15.3491	0.893718	27.8093	0.977616	26.8093	1.25178	44.4192
		0.09178	4.6717	0.383973	16.3137	0.895682	27.9626	0.977465	26.7268	1.25261	44.4412
		0.092688	5.04965	0.386359	16.5991	0.893314	27.4552	0.97749	26.7228	1.2534	44.4581
		0.093652	5.42405	0.384773	15.6722	0.89542	28.1298	0.977231	26.555	1.2542	44.4775
		0.094452	5.70787	0.38409	15.5876	0.896037	27.8708	0.977533	26.7446	1.25503	44.4983
		0.095168	5.96443	0.387951	16.7928	0.893582	27.4533	0.977757	26.8284	1.25586	44.5151
		0.09616	6.28536	0.389616	16.9401	0.897235	28.4602	0.978188	27.0306	1.2567	44.532
		0.097572	6.71515	0.387894	16.1757	0.895469	27.6535	0.97848	27.1456	1.25754	44.5566
		0.098872	7.05451	0.38791	16.2484	0.894424	27.713	0.979145	27.4614	1.25833	44.5799
		0.099532	7.1867	0.390416	16.9699	0.898769	28.7781	0.979571	27.6232	1.25909	44.5903
		0.099804	7.20614	0.391312	16.9685	0.89648	27.9205	0.980459	28.0574	1.25986	44.6032
		0.100268	7.33056	0.38992	16.2351	0.896941	28.2304	0.980939	28.2073	1.26067	44.6214
		0.10136	7.62605	0.389645	16.2233	0.900116	28.7622	0.981735	28.5595	1.26149	44.6447
		0.102836	7.95874	0.392384	17.135	0.897235	27.8557	0.982614	28.944	1.26232	44.6667
		0.104472	8.24467	0.393727	17.2321	0.8983	28.3472	0.983376	29.1984	1.26315	44.6849
		0.10554	8.36098	0.391716	16.3388	0.90132	28.6881	0.983933	29.3629	1.26394	44.7082
		0.1059	8.31821	0.390512	16.1221	0.897898	27.7988	0.985061	29.8506	1.26469	44.7315
		0.105876	8.24174	0.391141	16.4518	0.900759	28.6709	0.985602	29.9469	1.26543	44.7406
		0.105908	8.22101	0.391345	16.4783	0.901245	28.4212	0.986071	30.0487	1.26621	44.7588
		0.105968	8.2236	0.391482	16.6039	0.899388	28.0321	0.986965	30.422	1.26701	44.7782
		0.106124	8.26766	0.393229	17.1847	0.900947	28.3869	0.987553	30.5713	1.26782	44.8015
		0.107016	8.49058	0.393857	17.2276	0.899288	27.7857	0.988249	30.7886	1.26863	44.8261
		0.108588	8.83402	0.392369	16.5794	0.899006	27.8293	0.9891	31.0338	1.26941	44.8417
		0.11016	9.04267	0.389739	15.8454	0.900749	28.0684	0.989908	31.2453	1.27016	44.8585
		0.110852	8.99861	0.388761	15.7092	0.897716	27.1977	0.990753	31.4006	1.2709	44.8728
		0.110724	8.78736	0.389037	16.0401	0.899416	27.8386	0.991571	31.5327	1.27157	44.8909
		0.110472	8.6124	0.389973	16.3533	0.900604	27.7962	0.992278	31.608	1.27225	44.9078
		0.110388	8.5476	0.389188	16.1757	0.896871	26.9737	0.992845	31.6167	1.27298	44.9259
		0.110584	8.59944	0.387957	15.92	0.899786	27.8372	0.993016	31.4211	1.27376	44.9402
		0.110892	8.68627	0.387161	15.8129	0.898927	27.3311	0.993251	31.4072	1.27455	44.9635
		0.112048	9.0024	0.385722	15.3828	0.896845	27.0556	0.9935	31.4158	1.27535	44.9856
		0.115664	9.69139	0.383076	14.8761	0.899618	27.6694	0.993737	31.4542	1.27615	44.9998
		0.121056	10.5035	0.382549	15.1027	0.898106	27.047	0.994161	31.6014	1.27689	45.0167
		0.126008	11.1045	0.383422	15.5566	0.89831	27.3145	0.994943	31.9066	1.27758	45.0361
		0.12968	11.5317	0.382739	15.4305	0.900676	27.6891	0.995386	31.8649	1.27825	45.0529
		0.133048	11.8928	0.381649	15.2574	0.89812	26.9459	0.995563	31.6899	1.27893	45.0698
		0.136916	12.1662	0.380967	15.2098	0.899598	27.44	0.9955	31.4698	1.27966	45.0892
		0.140724	12.3503	0.381108	15.3875	0.89939	27.1797	0.99581	31.5128	1.28042	45.1061
		0.143644	12.4358	0.381029	15.3789	0.897088	26.7272	0.995245	31.0874	1.2812	45.1255
		0.146276	12.5343	0.38009	15.1026	0.898492	27.0998	0.994637	30.8019	1.28193	45.1437
		0.148932	12.6574	0.378273	14.7188	0.897233	26.6333	0.994716	30.9532	1.28262	45.1709
		0.151412	12.7572	0.378422	14.9448	0.897396	26.9041	0.994496	30.8825	1.28335	45.1916
		0.154244	12.8997	0.379465	15.2678	0.899212	27.1816	0.993792	30.5481	1.28411	45.2098
		0.157464	13.0086	0.379165	15.1674	0.896651	26.4351	0.99329	30.3645	1.28486	45.2266
		0.160204	13.0565	0.377651	14.7135	0.898749	27.2035	0.99318	30.426	1.28556	45.2383
		0.162116	13.0811	0.376535	14.5654	0.900459	27.3396	0.992431	30.0633	1.28628	45.2551
		0.164368	13.1843	0.377465	15.0596	0.896682	26.5533	0.991508	29.6484	1.28702	45.2759
		0.166996	13.3212	0.3778	15.1039	0.899945	27.4961	0.990882	29.4298	1.28777	45.2914
		0.169908	13.4183	0.376853	14.7022	0.899318	27.138	0.990069	29.1185	1.28848	45.3121
		0.172444	13.461	0.375659	14.4373	0.898786	27.1479	0.988851	28.5894	1.28922	45.3303
		0.17414	13.474	0.376353	14.7393	0.900753	27.6151	0.987859	28.2425	1.28998	45.3445
		0.176244	13.6049	0.377443	14.9586	0.899708	27.2583	0.98698	27.9545	1.29074	45.3614
		0.179448	13.7461	0.377345	14.8199	0.900478	27.627	0.985876	27.5943	1.29156	45.3821
		0.18168	13.4588	0.376253	14.4552	0.901833	27.7486	0.985004	27.3815	1.29238	45.4042
		0.180464	12.4564	0.376241	14.4876	0.900516	27.5141	0.984124	27.1634	1.29314	45.4262
		0.17656	10.9814	0.37821	15.0492	0.902351	28.0334	0.983137	26.9335	1.29382	45.443
		0.172632	9.79128	0.379404	15.1576	0.902576	27.9918	0.982416	26.8462	1.29454	45.4573
		0.169864	9.11525	0.37888	14.7288	0.902914	28.1087	0.981598	26.6593	1.29525	45.4741
		0.168632	8.9377	0.378455	14.6555	0.903912	28.2627	0.980878	26.5887	1.29595	45.4962
		0.1686	9.13723	0.381473	15.622	0.903592	28.2118	0.980606	26.736	1.29666	45.5182
		0.16966	9.68626	0.383986	16.0409	0.9045	28.4853	0.980049	26.6118	1.29738	45.5364
		0.17106	10.2962	0.383861	15.7139	0.904286	28.2844	0.979208	26.3772	1.29808	45.5519
		0.17166	10.5189	0.382963	15.4476	0.90468	28.5646	0.979045	26.5391	1.29877	45.5739
		0.17146	10.401	0.384865	16.0441	0.905937	28.8308	0.978514	26.3666	1.29945	45.5934
		0.17102	10.1768	0.386816	16.3705	0.904512	28.4093	0.977494	25.9979	1.30062	45.6231
		0.170836	10.112	0.386808	16.0897	0.905802	28.9424	0.977104	26.0606	1.30236	45.6644
		0.170804	10.1262	0.385729	15.6225	0.906447	28.8532	0.977076	26.2568	1.30431	45.7132
		0.17092	10.2286	0.386478	15.8379	0.904931	28.5711	0.976455	26.0408	1.3059	45.7596
		0.171724	10.6187	0.388914	16.3744	0.907639	29.313	0.976202	26.0778	1.30718	45.8034
		0.17336	11.2844	0.389612	16.383	0.905516	28.6166	0.976331	26.2364	1.30815	45.8242
		0.175644	12.0291	0.389559	16.1769	0.905278	28.799	0.975902	26.0197	1.30888	45.8423
		0.177844	12.6211	0.389765	16.1994	0.907922	29.3823	0.975678	25.9814	1.30954	45.8579
		0.179704	13.0626	0.391404	16.6493	0.904131	28.3247	0.976014	26.2496	1.31019	45.8721
		0.181396	13.3667	0.392276	16.7676	0.905243	29.0018	0.976073	26.288	1.31102	45.8993
		0.18298	13.509	0.392204	16.5568	0.907647	29.2681	0.976335	26.4584	1.31254	45.9486
		0.183608	13.3409	0.39119	16.2212	0.903116	28.1727	0.976924	26.7907	1.31475	46.0108
		0.18332	13.0446	0.391576	16.3607	0.905151	29.0593	0.976943	26.7253	1.31724	46.0769
		0.182916	12.8544	0.393124	16.7247	0.906349	28.9986	0.977073	26.7644	1.31946	46.1365
		0.18308	12.9526	0.393384	16.6752	0.902057	28.034	0.977431	26.9262	1.32094	46.1702
		0.184768	13.3824	0.3924	16.2761	0.904729	29.0414	0.977839	27.1092	1.32183	46.1935
		0.1875	13.7734	0.391939	16.2279	0.904188	28.577	0.978541	27.4211	1.32256	46.213
		0.1894	13.7241	0.392829	16.6032	0.901582	28.1311	0.979192	27.6827	1.32331	46.2298
		0.189664	13.4545	0.392859	16.578	0.904492	29.0098	0.979896	27.9688	1.32402	46.2454
		0.189752	13.4027	0.392143	16.3202	0.9029	28.3538	0.980786	28.3356	1.32469	46.2622
		0.191464	13.715	0.391127	16.0632	0.901112	28.184	0.981561	28.6097	1.32536	46.2765
		0.193372	13.8589	0.390657	15.9885	0.904543	29.0237	0.982337	28.8654	1.32604	46.3024
		0.193976	13.5907	0.390229	15.8927	0.901014	27.9059	0.983349	29.2545	1.32674	46.3231
		0.193492	13.298	0.389984	15.8406	0.899459	27.9507	0.984245	29.526	1.32743	46.3426
		0.193476	13.307	0.388812	15.4382	0.902222	28.4317	0.984937	29.6774	1.32812	46.3594
		0.194696	13.6529	0.387324	15.1893	0.898243	27.3866	0.985706	29.867	1.32882	46.375
		0.19646	13.9107	0.386959	15.3247	0.899224	27.8742	0.986029	29.8043	1.32954	46.3931
		0.197304	13.7643	0.387412	15.5718	0.900051	27.9013	0.986061	29.5948	1.33021	46.4112
		0.19694	13.43	0.385869	15.1041	0.8987	27.567	0.986227	29.5314	1.33086	46.4242
		0.19644	13.1933	0.3829	14.4844	0.900457	28.0771	0.986769	29.6893	1.33154	46.4372
		0.196084	13.0292	0.382024	14.5781	0.900039	27.6886	0.986816	29.5519	1.33224	46.4527
		0.195868	12.9399	0.382992	15.1264	0.898573	27.6001	0.987273	29.7051	1.33296	46.4722
		0.195844	12.9283	0.382159	14.8952	0.90072	28.044	0.987927	29.9483	1.33369	46.4942
		0.195868	12.9425	0.379406	14.2404	0.898943	27.5063	0.988337	30.0289	1.33444	46.5175
		0.195692	12.8531	0.378118	14.1697	0.899814	27.8683	0.988412	29.9257	1.33517	46.537
		0.195316	12.6833	0.37868	14.6196	0.900276	27.7797	0.988771	30.0208	1.3359	46.5616
		0.19492	12.5097	0.378692	14.6249	0.898904	27.3444	0.988729	29.8544	1.33661	46.5745
		0.194484	12.3179	0.376424	13.9821	0.900859	27.7943	0.988863	29.828	1.33736	46.5849
		0.193972	12.1079	0.374294	13.6637	0.899749	27.2479	0.988861	29.7282	1.33811	46.6095
		0.193556	11.9459	0.373933	13.9293	0.898771	27.2459	0.988598	29.4812	1.33887	46.6264
		0.193304	11.8461	0.374249	14.1466	0.902084	27.9594	0.988092	29.1039	1.33963	46.6497
		0.193196	11.7904	0.372492	13.6512	0.900882	27.5518	0.98831	29.2089	1.3404	46.6692
		0.193108	11.7502	0.37021	13.2567	0.902347	27.9211	0.988018	28.9638	1.34117	46.6964
		0.193016	11.6932	0.369943	13.4258	0.902912	27.9759	0.987404	28.5535	1.34192	46.7119
		0.192784	11.5794	0.371473	13.9604	0.904018	28.0744	0.987098	28.364	1.34262	46.734
		0.192352	11.3868	0.371643	13.9412	0.904582	28.0487	0.986847	28.2061	1.34335	46.7482
		0.191924	11.1902	0.370961	13.7654	0.905522	28.1656	0.98588	27.6431	1.34414	46.7741
		0.191188	10.9038	0.370788	13.7925	0.907073	28.6406	0.98491	27.1668	1.3449	46.791
		0.189624	10.3908	0.371412	14.0793	0.90932	28.7483	0.984396	27.0048	1.34561	46.7988
		0.1874	9.73939	0.371898	14.1612	0.907192	28.2553	0.983569	26.6454	1.34633	46.8143
		0.185512	9.28368	0.371084	13.8005	0.910949	29.4009	0.982582	26.2509	1.34708	46.835
		0.184568	9.1295	0.36958	13.4807	0.911482	29.0065	0.982169	26.2047	1.34783	46.8558
		0.184376	9.12691	0.369927	13.7284	0.908567	28.3868	0.981727	26.0863	1.34863	46.8674
		0.184076	9.04267	0.372553	14.4281	0.91288	29.6975	0.980792	25.7019	1.34942	46.8934
		0.18278	8.7096	0.373096	14.4472	0.91289	29.1505	0.98029	25.6417	1.35022	46.9258
		0.181	8.33914	0.3726	14.2014	0.910233	28.5328	0.9801	25.7138	1.351	46.9465
		0.179848	8.20565	0.372888	14.2913	0.913918	29.7537	0.979216	25.3769	1.3518	46.9633
		0.17982	8.34024	0.374478	14.7558	0.915976	29.7193	0.978618	25.2819	1.35257	46.9789
		0.180496	8.66554	0.374988	14.8185	0.911341	28.4886	0.978486	25.4053	1.35335	46.9906
		0.181664	9.15917	0.374886	14.6996	0.915218	29.7743	0.977849	25.2013	1.35412	47.0087
		0.182892	9.63173	0.374614	14.6263	0.915912	29.4221	0.977037	24.9582	1.35492	47.0307
		0.183552	9.82186	0.375512	14.9098	0.912053	28.437	0.976704	24.9931	1.35571	47.0528
		0.184064	9.9708	0.37712	15.2831	0.914535	29.3428	0.976247	24.9356	1.35652	47.0696
		0.18516	10.3543	0.377694	15.2897	0.915039	29.1942	0.975637	24.7897	1.35734	47.0942
		0.18654	10.8079	0.376569	14.7724	0.913424	28.8711	0.975414	24.8828	1.35814	47.1124
		0.187828	11.1784	0.376706	14.8873	0.915845	29.6071	0.975465	25.0876	1.35889	47.1279
		0.190052	11.7663	0.379363	15.6399	0.914339	29.035	0.975163	25.0559	1.35958	47.1344
		0.194804	12.8346	0.380706	15.7509	0.913998	29.068	0.975037	25.1246	1.36033	47.1577
		0.202124	13.8851	0.379447	15.0598	0.915671	29.2794	0.975398	25.4734	1.3611	47.1798
		0.208016	14.2697	0.378665	14.8953	0.912922	28.5983	0.975394	25.5646	1.36183	47.1901
		0.210356	14.0935	0.380306	15.4199	0.913267	28.8804	0.975329	25.632	1.36254	47.2083
		0.211904	14.1945	0.381527	15.5956	0.91348	28.7284	0.975633	25.912	1.36324	47.229
		0.216736	14.6981	0.381343	15.406	0.911135	28.3861	0.97569	26.0138	1.36398	47.2458
		0.223068	15.0942	0.380969	15.2805	0.912737	28.9688	0.97578	26.1499	1.36469	47.2626
		0.227172	15.0889	0.381524	15.4324	0.910094	28.3108	0.976131	26.4406	1.36538	47.2769
		0.229828	15.1421	0.3825	15.632	0.9094	28.4119	0.976441	26.6989	1.36613	47.2987
		0.233804	15.3443	0.382714	15.6207	0.9094	28.472	0.977135	27.1534	1.36695	47.3205
		0.23878	15.5749	0.38219	15.3558	0.906855	27.9502	0.977878	27.608	1.36777	47.3332
		0.242984	15.6773	0.381888	15.2957	0.907294	28.1966	0.978651	28.0144	1.36856	47.3551
		0.247496	15.8289	0.382745	15.5917	0.906082	27.7533	0.979276	28.3031	1.36933	47.3717
		0.251848	15.9067	0.383651	15.7442	0.903653	27.4316	0.980218	28.7425	1.3701	47.3924
		0.255264	15.965	0.383214	15.3947	0.90372	27.5286	0.980876	29.0095	1.37089	47.408
		0.258948	16.0959	0.381341	14.8959	0.901886	27.1672	0.981727	29.322	1.37171	47.4235
		0.26314	16.2346	0.381294	15.0293	0.901147	27.119	0.982104	29.3913	1.37256	47.4404
		0.266828	16.3175	0.382749	15.4608	0.900345	27.0403	0.983045	29.7746	1.3734	47.4559
		0.270828	16.4532	0.382551	15.291	0.898402	26.7146	0.983522	29.8241	1.37422	47.4767
		0.275208	16.5927	0.380992	14.81	0.8996	27.0998	0.984057	29.9576	1.37499	47.4948
		0.279052	16.6534	0.380341	14.7168	0.896641	26.2271	0.984576	30.1142	1.37577	47.5168
		0.28238	16.7181	0.381308	15.0981	0.895612	26.5455	0.985443	30.428	1.37655	47.5363
		0.28572	16.7945	0.381518	15.0306	0.898486	27.1659	0.98569	30.3586	1.37735	47.5518
		0.28896	16.8645	0.378869	14.1552	0.894616	26.1405	0.986165	30.5178	1.37817	47.5713
		0.292648	16.9786	0.376361	13.7311	0.895986	26.9557	0.986943	30.7318	1.37902	47.5946
		0.296192	17.0887	0.377235	14.3607	0.897261	27.1929	0.98739	30.7351	1.37986	47.6127
		0.299148	17.1263	0.37792	14.5722	0.895008	26.7298	0.987665	30.7041	1.38065	47.6257
		0.302656	17.2559	0.37518	13.7814	0.89619	27.2134	0.988245	30.8925	1.38144	47.6425
		0.306444	17.3531	0.372398	13.2997	0.896018	27.1784	0.988818	31.0391	1.38221	47.6607
		0.30922	17.3233	0.371343	13.2238	0.895733	27.1843	0.989039	30.9916	1.38301	47.6749
		0.31108	17.3233	0.370265	13.1041	0.895665	27.185	0.989292	30.9949	1.38383	47.6918
		0.313568	17.4373	0.369441	12.937	0.894435	26.8679	0.989606	31.0378	1.38469	47.7099
		0.316404	17.5579	0.367735	12.6211	0.895194	27.1982	0.989829	31.0206	1.38553	47.732
		0.318956	17.6201	0.366688	12.5576	0.895386	27.0126	0.989565	30.7292	1.38632	47.7592
		0.321368	17.7186	0.367484	13.1516	0.893827	26.8295	0.989541	30.7147	1.3871	47.7825
		0.324432	17.8339	0.368755	13.4464	0.896392	27.4466	0.989731	30.8131	1.38788	47.7903
		0.326684	17.5787	0.3671	12.9389	0.89591	27.2121	0.989586	30.6864	1.38865	47.8032
		0.325948	16.6357	0.366012	12.8087	0.896206	27.3231	0.989518	30.6461	1.38944	47.8201
		0.32294	15.3821	0.365657	12.7909	0.896827	27.4109	0.989624	30.6844	1.39027	47.846
		0.319916	14.4133	0.365467	12.8193	0.896949	27.3978	0.989402	30.4974	1.39116	47.8655
		0.318068	13.9755	0.365108	12.7592	0.898686	27.7657	0.989353	30.4452	1.39202	47.8823
		0.317288	13.8628	0.364539	12.67	0.897873	27.372	0.989018	30.2028	1.39282	47.9043
		0.316908	13.8032	0.364157	12.6654	0.897939	27.5788	0.988671	29.9781	1.3936	47.9264
		0.316192	13.5984	0.364641	12.9442	0.900188	27.9574	0.988733	30.0039	1.39438	47.9419
		0.315296	13.3716	0.365908	13.2032	0.897427	27.1461	0.9886	29.885	1.39515	47.9549
		0.31436	13.1556	0.365935	13.1596	0.899206	27.7539	0.987978	29.4707	1.39596	47.9691
		0.313332	12.954	0.366233	13.2072	0.900318	27.6859	0.987749	29.3279	1.3968	47.9808
		0.312524	12.8401	0.366422	13.2588	0.898327	27.1851	0.987518	29.1468	1.39766	47.9938
		0.31206	12.7961	0.366545	13.3083	0.901214	27.8273	0.986841	28.6961	1.39842	48.0054
		0.311628	12.7054	0.367008	13.3815	0.900827	27.5036	0.986437	28.4515	1.39916	48.0093
		0.310992	12.5537	0.366616	13.1417	0.901086	27.6469	0.986129	28.2633	1.39988	48.0093
		0.309532	12.2531	0.365886	13.0313	0.90298	27.9443	0.985676	28.0149	1.40054	48.0106
		0.307596	11.9485	0.3684	13.8433	0.902067	27.637	0.985461	27.9344	1.4012	48.0158
		0.306192	11.8059	0.3728	14.7901	0.903551	28.1147	0.985045	27.7078	1.40186	48.0197
		0.306032	11.9304	0.372245	14.1995	0.90381	27.8894	0.984598	27.4885	1.40258	48.0197
		0.306612	12.2621	0.370439	13.7455	0.902318	27.5776	0.984761	27.6199	1.40329	48.0119
		0.307756	12.8306	0.373008	14.66	0.905606	28.4325	0.98468	27.5373	1.40395	48.0093
		0.308764	13.2553	0.376159	15.3147	0.904369	27.787	0.984333	27.3007	1.40458	48.0132
		0.308764	13.1972	0.375657	14.8383	0.903494	27.7843	0.984592	27.456	1.40519	48.0158
		0.308072	12.8179	0.374278	14.4974	0.905998	28.1648	0.984639	27.4078	1.4058	48.0106
		0.307412	12.5213	0.375582	14.9388	0.9036	27.4546	0.984108	27.0616	1.40645	48.0132
		0.307216	12.4436	0.377529	15.3062	0.903814	27.52	0.984288	27.1944	1.40711	48.0119
		0.307508	12.5978	0.377653	15.106	0.904043	27.4229	0.984527	27.3134	1.40778	48.0171
		0.308316	12.9835	0.376749	14.7572	0.90428	27.4453	0.984367	27.1839	1.4084	48.0158
		0.309584	13.5274	0.377686	15.0142	0.904849	27.551	0.984645	27.3604	1.40905	48.0119
		0.3111	14.1077	0.380412	15.6849	0.903914	27.2253	0.985149	27.5956	1.40973	48.0106
		0.312676	14.6166	0.381329	15.7892	0.904453	27.452	0.985708	27.8256	1.41039	48.0158
		0.31362	14.8006	0.381227	15.5507	0.904241	27.2669	0.986286	28.062	1.41096	48.0106
		0.313624	14.6375	0.38128	15.5044	0.902047	26.8032	0.986961	28.3495	1.41153	48.0132
		0.313372	14.4395	0.382137	15.7528	0.903182	27.1117	0.987745	28.6771	1.41238	48.1117
		0.313588	14.5016	0.383006	15.8835	0.901767	26.6063	0.988486	28.9758	1.41356	48.1946
		0.31474	14.9145	0.3828	15.6325	0.90059	26.6287	0.988988	29.1244	1.41436	48.0586
		0.316716	15.5167	0.381063	15.1747	0.90179	26.8461	0.989565	29.3385	1.41423	47.6104
		0.318768	15.9741	0.38202	15.6815	0.898857	26.0639	0.990541	29.7316	1.41398	47.3502
		0.320752	16.3211	0.384751	16.3917	0.899922	26.6136	0.991088	29.836	1.41492	47.669
		0.32206	16.404	0.384633	16.142	0.899886	26.4478	0.991716	29.9999	1.41667	48.0858
		0.322384	16.2201	0.382516	15.4291	0.896802	25.7832	0.992604	30.3137	1.41828	48.297
		0.322464	16.1256	0.3822	15.439	0.899757	26.6454	0.993327	30.4875	1.41891	48.2206
		0.323764	16.4932	0.382616	15.5877	0.89858	26.1691	0.993559	30.4491	1.41983	48.3126
		0.325864	16.9632	0.382288	15.4457	0.897612	26.2397	0.994753	30.9274	1.42098	48.4357
		0.326928	16.8933	0.380616	14.8947	0.899288	26.6606	0.995663	31.1428	1.4221	48.4176
		0.3267	16.4687	0.379484	14.7064	0.898845	26.5766	0.996037	31.0682	1.42279	48.3424
		0.32618	16.1114	0.379978	15.0056	0.899492	26.8508	0.997051	31.4191	1.42329	48.332
		0.325992	15.9507	0.381047	15.2415	0.899771	26.942	0.997871	31.5677	1.42433	48.507
		0.325896	15.8393	0.379567	14.629	0.899245	26.862	0.997916	31.3813	1.42538	48.551
		0.326016	15.8406	0.377365	14.1651	0.9001	27.0477	0.998422	31.563	1.42633	48.5588
		0.326884	16.2044	0.378178	14.6957	0.899592	26.9261	0.998884	31.6548	1.42703	48.5329
		0.328484	16.7496	0.380235	15.2751	0.899367	26.9379	0.999092	31.6336	1.42802	48.6145
		0.329552	16.8622	0.379476	14.8925	0.899439	27.0291	0.9995	31.7077	1.42902	48.6703
		0.329564	16.5296	0.377314	14.3738	0.899678	27.1242	0.999737	31.6707	1.42985	48.6392
		0.328848	16.0713	0.377237	14.5588	0.900251	27.2814	1.00006	31.6958	1.43094	48.7568
		0.328144	15.698	0.378269	14.8905	0.899241	27.0343	1.00036	31.6992	1.43197	48.7464
		0.326876	15.1373	0.377718	14.6341	0.900278	27.4248	1.00032	31.5083	1.43294	48.7529
		0.325628	14.6505	0.375241	13.947	0.900494	27.3303	1.00054	31.5916	1.43366	48.7582
		0.324968	14.4097	0.374167	13.8229	0.90009	27.3647	1.00063	31.5625	1.43481	48.8927
		0.324828	14.3592	0.375139	14.2544	0.900759	27.588	1.00004	31.162	1.43549	48.815
		0.324556	14.2438	0.375657	14.2669	0.900863	27.6171	1.00003	31.2116	1.4364	48.881
		0.323936	14.0131	0.37382	13.6617	0.901431	27.9256	1.00002	31.2281	1.43749	49.0076
		0.322636	13.5741	0.372729	13.556	0.90341	28.1813	0.999451	30.9063	1.43874	49.0878
		0.32108	13.1339	0.374824	14.3904	0.902008	27.9164	0.999243	30.8456	1.44009	49.1758
		0.319236	12.695	0.376484	14.648	0.904837	28.7218	0.999147	30.8436	1.44103	49.0039
		0.317928	12.4475	0.374696	13.9596	0.9031	28.0974	0.998529	30.5185	1.4414	48.7645
		0.317304	12.3658	0.372949	13.6207	0.902837	28.221	0.99778	30.171	1.44192	48.8214
		0.316912	12.2932	0.373647	13.9663	0.904598	28.6775	0.997155	29.9199	1.44327	49.1358
		0.315776	12.0159	0.375355	14.2669	0.902402	28.0625	0.996647	29.7448	1.44432	49.1849
		0.313972	11.6859	0.374655	13.8659	0.903449	28.4958	0.995814	29.3873	1.44507	49.1732
		0.312356	11.4777	0.373457	13.593	0.904622	28.5011	0.994761	28.9381	1.44587	49.2562
		0.311384	11.3768	0.375478	14.3045	0.902616	27.9593	0.993786	28.5787	1.44685	49.2769
		0.310116	11.1514	0.37868	15.024	0.904651	28.4879	0.992745	28.1922	1.44781	49.3469
		0.308004	10.8274	0.378339	14.7016	0.903814	28.102	0.991308	27.6398	1.44876	49.33
		0.3063	10.6524	0.376686	14.2272	0.903776	28.2566	0.990312	27.3709	1.44948	49.2873
		0.305676	10.6913	0.377678	14.6547	0.905865	28.696	0.989186	27.0683	1.44992	49.203
		0.30542	10.7172	0.380341	15.2527	0.905094	28.4337	0.988357	26.9519	1.45052	49.308
		0.305076	10.6848	0.380245	14.8583	0.906576	28.9292	0.987445	26.7603	1.45152	49.4143
		0.304456	10.5733	0.378359	14.263	0.907159	28.8136	0.986378	26.5133	1.45259	49.5102
		0.30318	10.3349	0.380065	14.8953	0.90671	28.6729	0.985296	26.3052	1.45358	49.4726
		0.301432	10.1236	0.383865	15.7615	0.906669	28.6438	0.984304	26.1321	1.4543	49.4117
		0.300296	10.1638	0.384035	15.5064	0.907104	28.7383	0.983529	26.099	1.4549	49.378
		0.300748	10.6057	0.383027	15.1477	0.905433	28.108	0.98292	26.1241	1.45612	49.6113
		0.301724	11.1252	0.384429	15.62	0.905647	28.3234	0.982314	26.0567	1.45736	49.6385
		0.302152	11.3312	0.386971	16.2324	0.906165	28.3161	0.981508	25.902	1.45831	49.6164
		0.30178	11.1758	0.387745	16.2886	0.906457	28.3068	0.981131	25.9641	1.45895	49.5918
		0.30088	10.852	0.387139	15.9074	0.905757	28.0848	0.980176	25.6423	1.45983	49.6981
		0.29976	10.4684	0.387231	16.0045	0.905645	28.071	0.979396	25.491	1.46083	49.7201
		0.298932	10.2675	0.38988	16.7147	0.905147	27.9494	0.978955	25.5154	1.46215	49.8549
		0.298992	10.4528	0.390618	16.613	0.905202	28.0202	0.978876	25.6642	1.46285	49.6359
		0.299996	10.993	0.388359	15.6504	0.906751	28.3592	0.978616	25.6516	1.46335	49.5335
		0.301568	11.7053	0.387531	15.618	0.904441	27.6952	0.97842	25.6615	1.46442	49.5931
		0.30316	12.3671	0.39048	16.5449	0.907094	28.4021	0.978535	25.8275	1.46639	49.8108
		0.304532	12.8787	0.391429	16.6441	0.905973	27.8505	0.978596	25.9405	1.46849	49.7797
		0.305428	13.1647	0.390661	16.2496	0.905092	27.7262	0.978239	25.7746	1.4711	49.886
		0.305704	13.2113	0.390208	16.1882	0.904849	27.6172	0.97798	25.721	1.47353	49.9366
		0.3058	13.2386	0.391388	16.5847	0.906018	27.8709	0.97801	25.8308	1.4762	49.9301
		0.306616	13.5482	0.392053	16.6996	0.905035	27.5201	0.97812	25.9682	1.47894	50.0221
		0.30826	14.0805	0.391453	16.391	0.90552	27.6654	0.978414	26.1888	1.48156	50.0208
		0.310228	14.561	0.389886	15.9853	0.905976	27.6812	0.978949	26.537	1.48387	50.1711
		0.311688	14.7812	0.389618	16.0805	0.907335	27.8655	0.979657	26.9295	1.4854	50.1154
		0.311908	14.6219	0.390557	16.393	0.905947	27.4216	0.980118	27.1475	1.48754	50.2152
		0.311436	14.3229	0.390104	16.1961	0.908298	28.0063	0.980529	27.3298	1.4895	50.2074
		0.311284	14.249	0.387814	15.5334	0.908137	27.6502	0.981133	27.6113	1.49164	50.2463
		0.312116	14.5946	0.386339	15.3875	0.908045	27.6945	0.981673	27.8268	1.4939	50.2748
		0.31428	15.1968	0.387633	15.9999	0.910069	28.1286	0.982424	28.1452	1.49643	50.3602
		0.316868	15.7097	0.387335	15.8507	0.908814	27.5908	0.983141	28.4042	1.49858	50.3615
		0.318892	15.9546	0.384733	15.036	0.909733	28.0804	0.983678	28.549	1.50066	50.4067
		0.319764	15.882	0.382694	14.7103	0.911994	28.3414	0.984643	28.917	1.50235	50.3407
		0.319652	15.558	0.382688	14.9369	0.910459	27.9449	0.985439	29.1343	1.50442	50.3757
		0.31908	15.2198	0.382447	14.958	0.912727	28.6828	0.985831	29.1349	1.50638	50.3951
		0.319048	15.2016	0.381337	14.664	0.914227	28.6762	0.98678	29.4844	1.50848	50.386
		0.320028	15.5892	0.379339	14.3012	0.913541	28.5487	0.987253	29.5063	1.51024	50.461
		0.321856	16.0998	0.379178	14.5866	0.916422	29.1466	0.987512	29.4825	1.51178	50.4287
		0.323204	16.2242	0.381045	15.209	0.91452	28.548	0.987929	29.5816	1.51373	50.47
		0.323368	15.9481	0.379414	14.5192	0.915653	28.9074	0.988392	29.6985	1.51575	50.5722
		0.322752	15.5853	0.375653	13.6517	0.918498	29.2926	0.988743	29.7533	1.51775	50.5878
		0.322344	15.3649	0.375555	14.0436	0.916312	28.6035	0.989157	29.8504	1.51901	50.3678
		0.322084	15.1926	0.377694	14.7002	0.918727	29.3725	0.989518	29.9106	1.51908	49.7967
		0.321932	15.085	0.375412	13.8665	0.919086	29.0396	0.990206	30.1015	1.51791	48.912
		0.32168	14.9532	0.37262	13.3379	0.917114	28.7376	0.990408	29.9675	1.51697	48.2761
		0.321492	14.8422	0.373496	13.959	0.918596	29.2688	0.990594	29.8816	1.51673	48.1117
		0.321288	14.6909	0.375949	14.5866	0.917341	28.908	0.9911	29.9827	1.5165	47.8732
		0.32086	14.4564	0.374676	14.0019	0.917831	29.103	0.9911	29.7752	1.51635	47.6996
		0.320152	14.1388	0.372839	13.6214	0.917863	29.0574	0.991306	29.7898	1.51645	47.7022
		0.319452	13.8459	0.373327	13.9253	0.916963	28.8109	0.991741	29.9206	1.51663	47.7384
		0.318176	13.3746	0.375408	14.4062	0.918596	29.1624	0.991516	29.6345	1.51673	47.7061
		0.316288	12.7802	0.375004	14.0971	0.917898	28.91	0.991002	29.2182	1.51681	47.6349
		0.314868	12.4073	0.373576	13.7251	0.918078	29.0276	0.990755	29.0041	1.51666	47.3811
		0.314572	12.3762	0.374733	14.1776	0.919945	29.2972	0.990194	28.5839	1.51566	46.722
		0.314656	12.3969	0.378024	14.9968	0.919222	29.1313	0.989498	28.1287	1.51486	46.3026
		0.314612	12.358	0.37821	14.7762	0.91968	29.3553	0.989045	27.8624	1.5154	46.7362
		0.314308	12.244	0.376284	14.1472	0.919098	29.2179	0.9888	27.7131	1.51663	47.4095
		0.313668	12.025	0.378024	14.7974	0.918818	29.237	0.988673	27.6338	1.51746	47.7268
		0.312308	11.6806	0.381902	15.7118	0.918282	29.2635	0.988284	27.3854	1.51811	47.9069
		0.310468	11.3169	0.38198	15.3373	0.917765	29.2165	0.987839	27.1654	1.51885	48.1726
		0.309144	11.1345	0.380045	14.6601	0.916522	28.982	0.987553	27.0742	1.51945	48.3605
		0.308888	11.1721	0.382182	15.3928	0.915998	28.9681	0.987204	26.9322	1.51976	48.3864
		0.308856	11.2058	0.385106	16.0152	0.914363	28.4983	0.986157	26.4274	1.51957	48.1376
		0.308876	11.2369	0.384731	15.5414	0.912618	28.3484	0.985184	26.0904	1.51949	48.0352
		0.308888	11.2382	0.383329	15.0729	0.912933	28.3814	0.984661	25.982	1.51964	48.1026
		0.30874	11.1708	0.385616	15.8234	0.910645	27.9289	0.983835	25.6595	1.51982	48.1687
		0.308428	11.071	0.388461	16.3685	0.911243	28.1667	0.983163	25.4744	1.51998	48.1856
		0.307932	10.9401	0.388345	15.8756	0.909665	27.8668	0.982669	25.341	1.52016	48.2283
		0.307492	10.8611	0.387165	15.4079	0.909708	28.026	0.9822	25.238	1.52066	48.4602
		0.307196	10.8287	0.389447	16.1129	0.909124	27.8728	0.981943	25.2711	1.52112	48.3501
		0.307056	10.8403	0.392445	16.7075	0.907851	27.7671	0.98162	25.2302	1.52162	48.2088
		0.307168	10.9543	0.392557	16.4267	0.908653	27.9474	0.9812	25.1258	1.52216	48.1959
		0.308008	11.3841	0.391429	15.9893	0.906612	27.559	0.9813	25.3213	1.52339	48.4304
		0.309428	12.0368	0.392694	16.4042	0.90781	27.9336	0.981182	25.285	1.52402	48.2813
		0.310892	12.6274	0.395016	16.948	0.905592	27.3893	0.980765	25.0921	1.52393	47.8992
		0.312332	13.1505	0.394665	16.5463	0.905769	27.5763	0.980531	25.0307	1.52389	47.8188
		0.313692	13.6075	0.392349	15.7786	0.905353	27.5201	0.980373	25.0353	1.52412	47.9108
		0.314684	13.8978	0.392461	15.9874	0.90559	27.5393	0.980014	24.9322	1.52435	48.0171
		0.315768	14.2062	0.394694	16.6646	0.904998	27.384	0.980104	25.1152	1.52464	48.1402
		0.317272	14.6193	0.394767	16.5278	0.906288	27.7229	0.980304	25.3352	1.5249	48.2556
		0.318592	14.8871	0.393173	15.9761	0.906231	27.6429	0.981014	25.8479	1.52518	48.3476
		0.319968	15.1796	0.392751	15.9569	0.906404	27.6773	0.981482	26.1486	1.52536	48.3981
		0.321952	15.5775	0.393698	16.3276	0.906388	27.7228	0.982192	26.5966	1.52553	48.4098
		0.324492	16.0739	0.393414	16.2001	0.907155	27.8728	0.982806	26.9626	1.52558	48.3437
		0.326408	16.3627	0.390863	15.353	0.906473	27.6495	0.9836	27.4145	1.52562	48.2918
		0.327048	16.2888	0.38879	15.0228	0.906653	27.6647	0.983737	27.4548	1.52576	48.3152
		0.32688	16.0621	0.389086	15.4476	0.90718	27.8391	0.984316	27.8004	1.52597	48.3774
		0.327448	16.242	0.389792	15.696	0.907943	27.8352	0.985014	28.1327	1.52613	48.3968
		0.329592	16.7392	0.388067	15.1021	0.907563	27.7394	0.98548	28.3216	1.52629	48.3942
		0.33224	17.068	0.385676	14.6674	0.908624	27.9185	0.985957	28.5496	1.52635	48.3605
		0.333392	16.8636	0.385606	15.04	0.909741	28.0956	0.986749	28.9593	1.52646	48.3631
		0.333196	16.5063	0.3866	15.4285	0.909435	27.826	0.987531	29.2507	1.52666	48.3994
		0.33286	16.3666	0.384743	14.8173	0.909992	28.0057	0.987996	29.4119	1.52708	48.5107
		0.333832	16.7199	0.381447	14.1592	0.911506	28.1873	0.988986	29.7799	1.5276	48.4056
		0.335956	17.1705	0.381169	14.4307	0.912278	28.2514	0.989335	29.737	1.52747	47.898
		0.337544	17.1911	0.382414	14.8939	0.913002	28.3175	0.989937	29.8949	1.52652	47.0718
		0.337532	16.817	0.38101	14.4684	0.914763	28.7073	0.990698	30.1413	1.52605	46.7469
		0.33692	16.5065	0.377922	13.8044	0.915645	28.5454	0.991073	30.136	1.52614	46.7793
		0.337236	16.6851	0.376918	13.883	0.91472	28.3769	0.991367	30.2265	1.52654	46.9815
		0.338544	17.111	0.378314	14.5093	0.917171	28.8433	0.992527	30.7391	1.52674	47.0256
		0.340296	17.414	0.377335	14.1307	0.915806	28.3887	0.993029	30.7563	1.52658	46.7936
		0.340924	17.2118	0.37381	13.2679	0.915943	28.3557	0.99308	30.6294	1.52637	46.5668
		0.34038	16.7586	0.372865	13.3478	0.915967	28.431	0.993867	30.9644	1.52624	46.4151
		0.33946	16.3509	0.375296	14.2154	0.917065	28.5077	0.994565	31.1118	1.52575	46.076
		0.3387	16.0557	0.374463	13.8118	0.915767	28.1708	0.994514	30.9123	1.5253	45.8
		0.338104	15.8471	0.371055	13.009	0.917714	28.581	0.994931	31.0807	1.52522	45.7998
		0.337596	15.6643	0.370569	13.1775	0.917504	28.4125	0.995445	31.2854	1.52537	45.9188
		0.337148	15.5127	0.373551	14.1177	0.917829	28.4588	0.995596	31.2497	1.52542	45.9395
		0.336704	15.352	0.372757	13.646	0.91779	28.4086	0.995873	31.3396	1.52542	45.9278
		0.336172	15.1667	0.369849	12.941	0.918073	28.3854	0.996	31.3079	1.52537	45.8669
		0.335752	15.0422	0.37032	13.3229	0.91652	28.0597	0.995951	31.1692	1.52469	45.4915
		0.335364	14.9363	0.373667	14.2677	0.916565	28.1086	0.996229	31.2465	1.52404	45.203
		0.33478	14.732	0.373406	14.0093	0.915478	27.7862	0.996249	31.1528	1.52358	45.0504
		0.333816	14.4084	0.371714	13.5475	0.915139	27.8841	0.995767	30.8389	1.52351	45.0296
		0.332	13.85	0.372708	14.0013	0.915655	27.995	0.995914	30.9704	1.52325	44.8508
		0.329984	13.323	0.376004	14.8608	0.913367	27.4764	0.996073	31.0715	1.52263	44.4985
		0.328704	13.0836	0.376284	14.7398	0.915002	28.0295	0.995463	30.6922	1.52211	44.2614
		0.328516	13.1148	0.374459	14.1293	0.9141	27.7091	0.994988	30.4378	1.52193	44.2404
		0.328328	13.0746	0.375137	14.5271	0.913018	27.6264	0.994931	30.4497	1.52194	44.2909
		0.327852	12.9412	0.378367	15.3338	0.913506	27.7453	0.994518	30.2032	1.52179	44.2249
		0.327208	12.7689	0.378604	15.1481	0.911702	27.2723	0.993927	29.8603	1.52107	43.9442
		0.326476	12.5913	0.376402	14.3798	0.911735	27.4698	0.993704	29.7521	1.52027	43.6945
		0.325592	12.3917	0.37789	15.0206	0.910894	27.224	0.993439	29.6094	1.51919	43.4718
		0.324396	12.1507	0.38131	15.8175	0.908551	26.926	0.992678	29.17	1.51862	43.5156
		0.323428	11.9977	0.381367	15.4641	0.909106	27.1705	0.99218	28.96	1.51844	43.7385
		0.322528	11.8591	0.379227	14.7208	0.90732	26.7926	0.991855	28.8338	1.51816	43.6464
		0.32174	11.7411	0.380953	15.3399	0.906692	26.9716	0.991208	28.512	1.51732	43.2178
		0.321196	11.7061	0.38381	15.9207	0.906861	27.0291	0.990622	28.2465	1.51651	42.9379
		0.321124	11.7567	0.383896	15.554	0.905616	26.8546	0.990424	28.1884	1.51608	42.9288
		0.32088	11.7048	0.38208	14.9455	0.905084	26.8943	0.989988	27.9373	1.51631	43.2929
		0.320588	11.653	0.3838	15.5546	0.904061	26.7285	0.989602	27.7398	1.51634	43.4225
		0.320416	11.6413	0.386667	16.1612	0.903429	26.6611	0.989386	27.6379	1.51542	42.9719
		0.320672	11.7696	0.386371	15.698	0.902912	26.5944	0.989141	27.5328	1.51472	42.7594
		0.321492	12.1416	0.384045	15.0373	0.901873	26.4484	0.988763	27.3365	1.51484	43.126
		0.322796	12.6961	0.385239	15.5757	0.902363	26.6677	0.988606	27.2949	1.5153	43.5676
		0.323796	13.0535	0.387549	16.0773	0.901335	26.3717	0.988282	27.121	1.51559	43.8654
		0.32402	13.025	0.38622	15.4054	0.900345	26.4801	0.988065	27.0345	1.51588	44.1578
		0.32364	12.7559	0.383284	14.6793	0.901443	26.7166	0.988271	27.1733	1.5164	44.5747
		0.323416	12.6172	0.383482	14.9086	0.898302	25.9661	0.988414	27.2572	1.5169	44.913
		0.3238	12.7739	0.38522	15.3473	0.900131	26.5872	0.988161	27.0557	1.51753	45.2875
		0.32524	13.3618	0.384594	15.0135	0.899865	26.4676	0.988314	27.145	1.51837	45.6915
		0.327488	14.179	0.3828	14.5378	0.898751	26.3758	0.988516	27.2097	1.51911	45.9113
		0.32966	14.8329	0.382388	14.4955	0.899822	26.6889	0.988569	27.1634	1.52	46.2415
		0.33142	15.2653	0.383243	14.8193	0.898708	26.4266	0.98888	27.2791	1.52088	46.5538
		0.332968	15.619	0.38301	14.6746	0.899253	26.7715	0.989192	27.3847	1.52185	46.87
		0.334248	15.8263	0.3805	13.9345	0.899524	26.7834	0.989441	27.4343	1.5222	46.8584
		0.334816	15.7758	0.378965	13.7013	0.899482	26.8223	0.989867	27.6028	1.52303	47.0162
		0.334752	15.5853	0.378888	13.9563	0.900541	27.1466	0.990198	27.7006	1.5236	46.9761
		0.33538	15.7784	0.379696	14.1828	0.90149	27.4102	0.990718	27.9146	1.5242	47.0021
		0.337312	16.2963	0.377718	13.5737	0.901718	27.467	0.991484	28.2708	1.52488	47.235
		0.339772	16.7987	0.375829	13.2857	0.902441	27.5133	0.992384	28.6625	1.52586	47.2763
		0.341292	16.9462	0.375861	13.5632	0.901359	27.2642	0.992969	28.8402	1.52593	46.753
		0.341688	16.836	0.378065	14.1724	0.903859	27.9335	0.993408	28.938	1.52552	46.1508
[truncated: 29,396 more rows]
