# Supplementary material for: Investigation of the Effect of Confining Pressure on the Mechanics-Permeability Behavior of Mudstone under Triaxial Compression
Source: Hindawi journal article supplement (doi:10.1155/2019/1796380), 2019-06-04
Supplement: f1 [file 1796380.f1.zip › Table_S2.xlsx]

## Sheet: Sheet1
Table S2: The data for relaionship of deviatoric stress and strain in the directioin of the intermediate principal stress
P4		P5		P6		P7		P8		P9
ϵ2 (%)	σ1-σ3 (MPa)	ϵ2 (%)	σ1-σ3 (MPa)	ϵ2 (%)	σ1-σ3 (MPa)	ϵ2 (%)	σ1-σ3 (MPa)	ϵ2 (%)	σ1-σ3 (MPa)	ϵ2 (%)	σ1-σ3 (MPa)
0	3.98129	0	3.92952	0	4.02203	0	4.01655	0	3.99913	0	4.09608
-0.003291	5.02104	0.00188	8.01821	-0.000163265	4.49322	1.63265e-05	4.77436	-0.000632653	4.41345	-0.000112	5.3821
-0.004276	5.3158	0.00528	9.59438	-0.000281633	4.74027	0.000269388	6.60776	-0.00116735	4.70811	0.001576	9.08986
-0.005346	5.6842	0.005336	9.48552	-0.000363265	4.7687	0.000526531	7.65233	-0.0017102	5.02981	0.000304	9.98198
-0.007476	6.05264	0.005328	9.29539	-0.000408163	4.7278	0.000759184	7.5301	-0.00215918	5.21603	0.000272	10.3291
-0.010696	6.49472	0.005288	9.66168	-0.000444898	4.87327	0.001	6.79149	-0.00248571	5.3377	0.00032	10.1283
-0.013476	6.86316	0.005392	10.2625	-0.000461224	5.27944	0.00120408	5.57383	-0.00283673	5.55301	0.000416	9.58968
-0.014866	7.0842	0.005528	10.2638	-0.000506122	5.73527	0.00114286	4.85696	-0.00331837	5.86026	0.000456	9.27475
-0.017896	7.45264	0.005664	9.27566	-0.000538776	6.10993	0.0013551	5.953	-0.00373061	6.00507	0.000448	9.32918
-0.019956	7.74736	0.005912	7.72814	-0.000559184	6.37097	0.00168571	7.22939	-0.00410204	6.19205	0.000376	9.72835
-0.023836	8.18948	0.006192	6.19205	-0.00057551	6.54796	0.00197959	7.44544	-0.00446531	6.36916	0.000296	10.2087
-0.025686	8.41052	0.006456	5.14834	-0.000587755	6.75029	0.00225714	7.13167	-0.00490204	6.58447	0.000304	10.6916
-0.027826	8.70528	0.006608	4.68355	-0.000608163	6.96642	0.00253061	6.31109	-0.00525714	6.73962	0.000408	10.9117
-0.029736	8.92632	0.006648	4.76381	-0.000616327	7.11693	0.00249388	5.73436	-0.00566122	6.97477	0.000528	10.8275
-0.031996	9.14736	0.006504	5.2908	-0.000616327	7.22713	0.00264082	6.58002	-0.00599592	7.12873	0.000584	10.4689
-0.033396	9.36844	0.006352	5.97062	-0.000612245	7.43398	0.00286531	7.50162	-0.00637551	7.34219	0.000616	10.1078
-0.035616	9.66316	0.006184	6.51317	-0.000579592	7.64598	0.0030449	7.65086	-0.00672653	7.53527	0.000616	9.972
-0.036796	9.81052	0.006112	6.68261	-0.000510204	7.65784	0.00323265	7.43809	-0.00710612	7.73623	0.000584	10.1119
-0.039916	10.1053	0.006128	6.34872	-0.000440816	7.58327	0.00339184	6.786	-0.00743673	7.91787	0.000536	10.4522
-0.041716	10.3263	0.00628	5.55754	-0.0004	7.65331	0.00345306	6.79861	-0.00778776	8.11202	0.000528	10.9585
-0.043276	10.5474	0.006472	4.65619	-0.000293878	7.93207	0.00362449	7.61591	-0.00809796	8.27246	0.000552	11.2331
-0.044596	10.6947	0.006688	4.05274	-0.000142857	8.13887	0.00381224	7.99979	-0.00838776	8.45669	0.000624	11.1709
-0.047336	10.8421	0.00676	3.94392	-2.44898e-05	8.32254	0.00391429	7.99318	-0.00871429	8.639	0.000696	10.8715
-0.072236	10.8421	0.00672	4.23274	0.000130612	8.45927	0.00399592	7.59416	-0.00901633	8.76659	0.000736	10.7419
-0.072696	11.0632	0.006584	4.84267	0.000318367	8.36214	0.00402857	7.33445	-0.00933061	8.93123	0.000752	10.7847
-0.073166	11.2842	0.00644	5.50056	0.000477551	7.98096	0.00417143	7.58153	-0.00961633	9.07604	0.00072	11.0141
-0.073626	11.5053	0.006296	6.0109	0.000653061	8.08668	0.00433061	7.75266	-0.00993061	9.22678	0.00068	11.2525
-0.074146	11.7509	0.006216	6.36422	0.000885714	8.47913	0.00446122	7.80358	-0.0102245	9.3853	0.000712	11.4871
-0.074826	12.0784	0.006176	6.54	0.00108163	8.63508	0.00458776	7.90136	-0.0105347	9.5497	0.000816	11.5299
-0.075516	12.283	0.006184	6.56851	0.00129796	8.39461	0.00470204	7.99717	-0.010849	9.7141	0.00096	11.3199
-0.076986	12.6269	0.006112	6.66053	0.00155918	7.68504	0.00484898	8.13715	-0.0112041	9.9023	0.001072	10.9856
-0.079366	13.0526	0.005984	7.00138	0.00180816	6.41978	0.00498367	8.33402	-0.0115224	10.0528	0.001128	10.8339
-0.083256	13.6421	0.005848	7.52362	0.00205306	5.251	0.00507347	8.412	-0.0118163	10.1354	0.00116	10.7899
-0.086176	14.0105	0.005784	8.00654	0.00231429	4.76145	0.00520408	8.53558	-0.0121388	10.2789	0.00116	10.7743
-0.089136	14.379	0.005776	8.29378	0.0024898	5.11232	0.00540408	8.66574	-0.0123959	10.3047	0.00116	10.8223
-0.092206	14.7474	0.005744	8.32598	0.00259184	6.26853	0.00560816	8.50722	-0.0126531	10.3669	0.00116	11.0594
-0.094826	15.0421	0.005712	8.26507	0.00269388	7.55496	0.00575918	8.44048	-0.012902	10.4799	0.001168	11.3834
-0.098196	15.3368	0.005672	8.46466	0.0027551	8.34779	0.0059102	8.55144	-0.0131796	10.5692	0.001264	11.736
-0.100046	15.6316	0.005664	8.85216	0.00282041	8.39138	0.00607347	8.92866	-0.0134041	10.6049	0.001376	11.8059
-0.102486	15.9263	0.005656	9.31469	0.00297143	7.67251	0.00631429	9.01856	-0.0136776	10.7623	0.001544	11.504
-0.105936	16.2947	0.00564	9.67709	0.00317143	6.39465	0.00647755	8.93466	-0.0139633	10.8654	0.001664	10.9107
-0.108436	16.5158	0.005648	9.98506	0.00331837	5.34811	0.00659184	8.95244	-0.0142122	10.8628	0.001752	10.4317
-0.110566	16.7368	0.005656	10.2701	0.00344082	5.26288	0.00671429	9.11035	-0.0143755	10.8079	0.001768	10.3552
-0.138886	16.8105	0.005656	10.4826	0.0035551	6.30081	0.00688163	9.33365	-0.0145714	10.8971	0.001776	10.6735
-0.138886	17.2526	0.005664	10.3621	0.00364082	7.5866	0.00700408	9.33764	-0.0147673	10.9459	0.001752	11.1903
-0.138926	17.4737	0.005704	9.84677	0.00366939	8.33782	0.00710204	9.20025	-0.014898	10.8924	0.001736	11.7148
-0.139836	17.6947	0.005744	9.42216	0.00373469	8.27638	0.00721224	9.27034	-0.0150408	10.93	0.00176	12.0539
-0.140206	17.8421	0.005768	9.28502	0.0038449	7.45112	0.00735918	9.67335	-0.0152531	11.1493	0.001816	12.1728
-0.140996	18.1368	0.005728	9.63067	0.00403265	6.01337	0.00770612	10.1483	-0.0154327	11.1697	0.001896	12.1549
-0.141706	18.3579	0.005688	10.2108	0.00425714	4.87033	0.00787755	9.8642	-0.0155878	11.2007	0.001992	11.9143
-0.142816	18.579	0.005664	10.6083	0.00446122	4.73755	0.00791429	9.51404	-0.0157755	11.3155	0.00208	11.6672
-0.144166	18.8737	0.005696	10.3105	0.00461633	5.71337	0.00798776	9.6878	-0.0159429	11.4357	0.002096	11.5882
-0.145746	19.0947	0.005728	9.53342	0.00472245	7.08176	0.00813469	10.186	-0.016102	11.4423	0.002032	11.7863
-0.148246	19.3895	0.0058	8.7085	0.00474286	8.15082	0.00833469	10.1979	-0.0162653	11.464	0.001984	12.1201
-0.151306	19.6842	0.005904	8.01562	0.00471429	8.38273	0.00844898	9.79026	-0.0164449	11.5599	0.002008	12.4566
-0.153156	19.9053	0.006032	7.61304	0.00470204	7.75834	0.0084898	9.81073	-0.0165878	11.5671	0.00208	12.6121
-0.155656	20.1263	0.00608	7.52755	0.00471837	6.44895	0.0086449	10.5811	-0.0167306	11.5367	0.00216	12.5746
-0.158436	20.3474	0.006104	7.6079	0.00477959	5.03378	0.00913061	11.1922	-0.016898	11.6604	0.002208	12.3286
-0.160286	20.4947	0.006144	7.61309	0.00483673	4.15376	0.00923673	10.3221	-0.0170653	11.7099	0.002216	12.2171
-0.162136	20.6421	0.006152	7.42776	0.00489796	4.18937	0.00909388	9.76239	-0.0171878	11.7595	0.002184	12.3894
-0.165586	20.7895	0.006224	6.90706	0.00492653	5.09525	0.00922449	10.4514	-0.0173551	11.901	0.002192	12.7158
-0.197216	20.8632	0.006272	6.26342	0.00493061	6.29968	0.00969388	11.2998	-0.0175388	12.0154	0.002272	12.8804
-0.197216	21.2316	0.006376	5.71824	0.00489796	7.19816	0.00986531	10.6715	-0.0176776	12.0518	0.002368	12.9063
-0.197256	21.4526	0.006448	5.22446	0.00486939	7.31312	0.00983265	10.09	-0.017849	12.2052	0.002432	12.8726
-0.198636	21.821	0.006488	4.83466	0.0048898	6.68089	0.0100163	10.4825	-0.0180612	12.2614	0.002448	12.8143
-0.199726	22.1158	0.006536	4.68197	0.00505306	5.37125	0.0104122	11.4517	-0.0182367	12.3328	0.00248	12.8286
-0.201886	22.4842	0.006552	4.72982	0.00529388	4.01077	0.0106449	11.1208	-0.0184082	12.455	0.002504	12.861
-0.204076	22.8526	0.006536	5.00674	0.00551429	3.18093	0.0106122	10.4106	-0.0186082	12.5409	0.002528	13.0554
-0.205936	23.0737	0.006392	5.81122	0.00573878	3.19283	0.0106776	10.665	-0.0187796	12.5851	0.00256	13.1629
-0.208926	23.2947	0.006032	7.4328	0.00586939	3.85357	0.0109633	11.7941	-0.0189837	12.7488	0.002608	13.2226
-0.211886	23.5158	0.005768	9.31325	0.00586531	4.79971	0.0113224	11.7168	-0.0191878	12.8076	0.00264	13.2187
-0.213996	23.7368	0.005712	10.5995	0.00579592	5.6784	0.0113429	10.805	-0.0194163	12.9317	0.00272	13.194
-0.216766	23.9579	0.005744	11.1527	0.00575918	6.25256	0.0113959	10.8771	-0.0196327	13.0638	0.002768	13.0696
-0.220506	24.179	0.005736	11.1838	0.00571837	6.3431	0.0117061	11.9321	-0.0198408	13.1443	0.002752	13.1318
-0.224226	24.4	0.00572	11.0023	0.00571429	5.82639	0.0121755	12.0127	-0.0200367	13.2065	0.002744	13.4528
-0.227006	24.5474	0.005768	10.6265	0.00575918	4.88953	0.0122776	10.9906	-0.0202816	13.3691	0.002768	13.6378
-0.229886	24.6947	0.005872	9.95045	0.00586939	3.87681	0.0122939	10.8691	-0.020498	13.4094	0.002832	13.5732
-0.232136	24.7684	0.006032	8.90923	0.00602449	2.96177	0.0126041	11.934	-0.0207388	13.5337	0.002872	13.4829
-0.240846	24.7684	0.006184	7.83557	0.00622449	2.35315	0.013049	12.3476	-0.0209959	13.658	0.002864	13.5282
-0.243626	24.9895	0.006312	7.01434	0.0064	2.1106	0.013098	11.609	-0.0212898	13.8108	0.00284	13.6741
-0.245526	25.1368	0.006408	6.59717	0.00654286	2.13571	0.0130122	11.344	-0.0215429	13.8617	0.002864	13.7841
-0.249176	25.3579	0.006544	6.354	0.00658776	2.2069	0.0131673	12.115	-0.0218408	14.0308	0.00292	13.7814
-0.252466	25.579	0.006608	6.2663	0.00657959	2.25171	0.0135388	12.6336	-0.0220816	14.0777	0.00296	13.7179
-0.256966	25.8	0.00664	6.31646	0.00654694	2.23981	0.0136449	11.7813	-0.0223633	14.2065	0.003008	13.7257
-0.259876	25.9474	0.006632	6.43392	0.00652245	2.25436	0.0135469	11.2462	-0.0226041	14.2909	0.003032	13.8979
-0.262656	26.0947	0.006624	6.46613	0.00648163	2.38727	0.0136776	12.1976	-0.0228735	14.4249	0.00308	13.9964
-0.265946	26.2421	0.006616	6.44539	0.00646122	2.80624	0.0141755	13.0684	-0.023098	14.4942	0.003136	14.0689
-0.269646	26.3895	0.006568	6.43373	0.00643265	3.76896	0.0143592	12.4117	-0.0233878	14.6355	0.003184	14.0871
-0.273356	26.5368	0.00652	6.41438	0.00639184	5.30383	0.0143347	11.8924	-0.0236408	14.687	0.003224	14.1286
-0.277936	26.7579	0.00652	6.3887	0.00635102	6.89417	0.0144898	12.6112	-0.0238939	14.7604	0.003264	14.0806
-0.283646	26.979	0.00648	6.38352	0.00630612	7.93078	0.0149918	13.3677	-0.0241306	14.8226	0.003296	14.1169
-0.290016	27.2	0.00648	6.40915	0.00628571	8.26114	0.015151	12.3787	-0.0243796	14.8682	0.003304	14.323
-0.294926	27.421	0.006456	6.42725	0.00627755	7.88846	0.0149673	11.566	-0.0245673	14.9065	0.003344	14.4202
-0.299386	27.5684	0.006488	6.47002	0.00626531	7.23438	0.0150612	12.5504	-0.0247796	14.9581	0.003384	14.3722
-0.305796	27.7895	0.006464	6.75384	0.00626939	7.37182	0.0155551	13.5765	-0.0250286	15.0315	0.003408	14.2089
-0.310116	27.9368	0.006416	7.31885	0.0063102	8.05166	0.0157673	13.4536	-0.0252245	15.0626	0.003416	14.2711
-0.316876	28.1579	0.006288	7.97026	0.00633469	8.7348	0.015902	13.3525	-0.025449	15.1373	0.0034	14.5122
-0.320576	28.3053	0.006232	8.58538	0.00636735	9.20993	0.0160163	13.4695	-0.0256735	15.1122	0.003376	14.6262
-0.324276	28.4526	0.006136	9.10618	0.00640408	9.33482	0.0162204	13.7575	-0.0259061	15.2107	0.00344	14.5796
-0.329026	28.6	0.006056	9.48202	0.00642041	9.10158	0.0164612	13.7998	-0.0260776	15.2226	0.003536	14.4344
-0.337416	28.821	0.006032	9.66984	0.00655918	9.38642	0.0166408	13.7271	-0.0262735	15.3396	0.003552	14.4487
-0.409366	28.821	0.006008	9.7177	0.00679184	9.84103	0.0167959	13.7807	-0.0264653	15.3747	0.00356	14.6625
-0.412116	28.0105	0.005992	9.86506	0.00702857	9.96722	0.0169633	13.7133	-0.0266571	15.4745	0.003592	14.8297
-0.419106	24.8421	0.005984	10.2495	0.00726531	9.91834	0.0172408	13.7735	-0.0268449	15.5366	0.00364	14.783
-0.423506	22.0421	0.005992	10.7081	0.00749388	9.4486	0.0174816	13.5264	-0.0270449	15.5068	0.003632	14.7493
-0.427556	20.421	0.006016	10.9414	0.00763673	9.43134	0.0175265	12.5268	-0.0272286	15.5252	0.003728	14.8452
-0.433556	18.4316	0.006056	10.9012	0.00783265	9.72331	0.0174571	12.3432	-0.0273878	15.5788	0.003792	14.9813
-0.431136	19.5368	0.006072	10.76	0.00798776	10.1653	0.0176612	13.2892	-0.0275673	15.6547	0.00384	14.9684
-0.427516	21.2316	0.006064	10.7742	0.00816327	10.4097	0.0179102	13.537	-0.0277102	15.6772	0.003856	14.9139
-0.424896	22.8526	0.006064	11.0088	0.00834694	10.5147	0.0179755	13.6116	-0.0278776	15.81	0.003888	14.8427
-0.423506	23.9579	0.006056	11.2291	0.00845714	10.3912	0.0180531	13.7007	-0.0280082	15.8298	0.00388	14.9049
-0.423146	25.2842	0.006064	11.1396	0.00868163	10.6443	0.0182163	13.9484	-0.0281592	15.8614	0.003872	15.0797
-0.423146	26.021	0.006048	10.8105	0.0089551	10.9905	0.0185102	14.3277	-0.0283224	15.8949	0.003912	15.1947
-0.422396	27.3474	0.006064	10.5837	0.00922449	11.2238	0.0186816	14.327	-0.0284571	15.9186	0.003944	15.2116
-0.420396	29.3368	0.006088	10.5021	0.00948571	11.2153	0.0188204	14.4036	-0.0285959	15.9654	0.004	15.1909
-0.422986	29.9263	0.006128	10.4891	0.00971429	10.7296	0.0190857	14.6184	-0.0287551	15.9852	0.003976	15.2423
-0.424636	30.221	0.006112	10.4787	0.00984898	10.7699	0.0192776	14.4136	-0.0288898	16.0262	0.003992	15.3249
-0.426696	30.7368	0.00612	10.4891	0.010102	11.2753	0.0192939	13.8646	-0.0290204	16.0817	0.004024	15.4026
-0.430126	31.179	0.00612	10.471	0.0103429	11.9102	0.019449	13.8191	-0.029151	16.0983	0.004104	15.3731
-0.437036	31.621	0.006128	10.4736	0.0105673	12.3635	0.0195224	13.2106	-0.0293061	16.1558	0.004168	15.32
-0.441816	31.9158	0.00616	10.4476	0.0107837	12.5028	0.0194286	13.087	-0.0294571	16.2814	0.004248	15.2992
-0.449276	32.2842	0.0062	10.3569	0.0109306	12.487	0.0196204	14.2729	-0.0296	16.3283	0.004312	15.3742
-0.458156	32.579	0.0062	10.1302	0.0111224	12.6144	0.0200735	14.9435	-0.029751	16.4361	0.004352	15.439
-0.465276	32.8	0.006216	9.77294	0.0113347	12.7955	0.0201918	14.257	-0.0299184	16.5234	0.004376	15.4506
-0.475856	33.1684	0.006256	9.2615	0.0115633	12.9831	0.020098	13.8098	-0.0300735	16.6404	0.004392	15.4078
-0.485526	33.3895	0.006312	8.68373	0.0117959	13.1047	0.020249	14.4281	-0.0302449	16.6946	0.00436	15.492
-0.491696	33.5368	0.006368	8.14766	0.0119878	13.1219	0.0206245	14.9216	-0.0304776	16.8361	0.004392	15.6074
-0.497876	33.6842	0.00648	7.71787	0.0122408	13.2541	0.0207878	14.5781	-0.0306735	16.8996	0.004448	15.5828
-0.508336	33.9053	0.006528	7.50034	0.012498	13.4867	0.0207673	14.074	-0.0309184	17.0536	0.004488	15.5089
-0.528766	34.2737	0.006568	7.45886	0.012751	13.7635	0.0208122	14.2444	-0.0311429	17.0913	0.00452	15.5646
-0.539296	34.5684	0.0066	7.30982	0.0130082	14.1104	0.0210612	14.9673	-0.0313551	17.2062	0.004552	15.7616
-0.551236	34.7895	0.00668	6.96379	0.0132122	14.2663	0.0212327	14.8853	-0.0315633	17.2662	0.004584	15.8355
-0.570626	35.1579	0.006736	6.5339	0.013298	14.2683	0.0212816	14.2676	-0.0317878	17.3725	0.004592	15.7642
-0.584466	35.5263	0.006776	6.16243	0.0133959	14.1309	0.021249	14.1546	-0.0319918	17.4656	0.004608	15.5052
-0.601576	35.8947	0.006808	5.81803	0.013502	13.6539	0.0213796	14.8351	-0.0322082	17.5625	0.00464	15.2658
-0.629146	36.6316	0.006856	5.50699	0.0135918	12.7501	0.0216612	15.1158	-0.0324653	17.6695	0.00468	15.2282
-0.632136	36.9263	0.006864	5.29574	0.0136735	11.51	0.0218	14.8159	-0.0326898	17.6939	0.004688	15.3198
-0.632976	37.3684	0.006856	5.22187	0.013698	10.5156	0.0217755	14.4572	-0.0329143	17.7593	0.004704	15.5167
-0.632136	37.7368	0.006864	5.20114	0.0137796	10.6385	0.0218816	14.7696	-0.0331306	17.803	0.00472	15.7487
-0.631636	37.9579	0.00688	5.0508	0.0139714	11.5305	0.0221878	15.5115	-0.0333837	17.9081	0.00476	15.921
-0.630536	38.2526	0.006888	4.77653	0.0141918	12.2618	0.0223184	15.3458	-0.0336041	17.959	0.00488	15.9703
-0.630176	38.4	0.00692	4.52688	0.0143837	12.5075	0.0223429	14.6494	-0.0338571	18.1144	0.004976	15.8238
-0.629996	38.4737	0.006896	4.37419	0.0145469	12.1811	0.0223347	14.726	-0.0341061	18.1904	0.005048	15.4134
-0.630546	37.4421	0.00688	4.38845	0.0146449	11.0229	0.0225388	15.7554	-0.0343633	18.2784	0.005112	14.9304
-0.631306	36.1158	0.00684	4.55539	0.014649	10.0179	0.0228449	15.8644	-0.0346041	18.3458	0.005144	14.7455
-0.634436	33.5368	0.006808	4.85299	0.0146571	10.152	0.0229918	15.5988	-0.0348449	18.4113	0.00516	14.8906
-0.636986	31.9895	0.006784	5.24654	0.0147388	11.0664	0.0230327	15.4396	-0.0350816	18.4457	0.005144	15.31
-0.638876	30.7368	0.006736	5.63918	0.0148367	12.0773	0.0232041	15.7369	-0.0353224	18.5362	0.005112	15.6335
-0.640656	29.1158	0.006688	5.73898	0.014902	12.4737	0.0234816	16.027	-0.035498	18.4522	0.005104	15.7901
-0.642366	27.421	0.006712	5.45645	0.0149347	12.0687	0.0236653	15.809	-0.0357143	18.468	0.005128	15.8744
-0.645086	25.6526	0.0068	4.90867	0.0149592	10.9073	0.0237918	15.2164	-0.035898	18.5353	0.005152	15.9482
-0.646226	24.2526	0.006848	4.28318	0.0149388	9.53111	0.0238816	15.3591	-0.0360694	18.5545	0.00516	15.8433
-0.644606	26.7579	0.006912	3.79358	0.0149265	8.72574	0.0242204	16.4974	-0.0362245	18.5526	0.005184	15.5931
-0.642426	28.7474	0.00696	3.60307	0.014951	9.21005	0.024502	16.4332	-0.0364327	18.7271	0.0052	15.5141
-0.638726	31.4	0.006928	3.80136	0.0150694	10.3986	0.0246	15.5935	-0.0366	18.776	0.005224	15.5841
-0.635076	33.3158	0.006832	4.46318	0.0151959	11.5172	0.0245388	15.357	-0.0367796	18.7845	0.00524	15.7072
-0.632256	35.4526	0.006624	5.53291	0.0153265	11.9208	0.0247143	16.0759	-0.0369347	18.7944	0.005272	15.8757
-0.630556	36.8526	0.006376	6.69336	0.0154041	11.5231	0.0249714	16.2866	-0.0371265	18.8557	0.005336	15.9003
-0.630556	37.6632	0.00616	7.5817	0.0154735	10.3754	0.0250939	16.0071	-0.037298	18.8643	0.00536	15.7811
-0.630206	38.1053	0.00604	8.06203	0.0154694	8.97938	0.0251796	15.8644	-0.0374531	18.8531	0.005344	15.7655
-0.628356	38.5474	0.005984	8.04523	0.015449	7.99229	0.0253429	15.9753	-0.0375755	18.8485	0.005288	15.8407
-0.627126	38.8421	0.005968	7.55842	0.0154204	8.10066	0.025498	16.1788	-0.0377184	18.8868	0.005256	15.9379
-0.625856	39.1368	0.006048	6.90946	0.0154286	9.06852	0.0256612	16.1841	-0.0378531	18.9053	0.005272	16.0027
-0.623926	39.3579	0.006184	6.42523	0.015449	10.3523	0.0258122	15.8095	-0.0379347	18.7434	0.005336	15.912
-0.621366	39.6526	0.006264	6.31651	0.0154449	11.459	0.0258694	15.7421	-0.038049	18.7302	0.005448	15.5842
-0.619446	39.8737	0.006256	6.55594	0.0154531	11.7391	0.0260449	16.3591	-0.0381918	18.8351	0.005544	15.3548
-0.617406	40.0948	0.006176	7.22803	0.0154735	11.0705	0.0264	16.889	-0.038302	18.7843	0.005624	15.36
-0.612506	40.3156	0.006048	8.20085	0.0154939	9.78749	0.0266122	16.6083	-0.0384286	18.8642	0.005624	15.5815
-0.607586	40.5368	0.005984	9.15912	0.0154898	8.51493	0.026751	16.3552	-0.0385837	19.0399	0.005568	15.8148
-0.599396	40.9052	0.006024	9.66917	0.015502	8.06633	0.0269224	16.5892	-0.0386898	19.0261	0.00552	15.9599
-0.590536	41.2736	0.005992	9.64848	0.0155224	8.81623	0.027249	17.349	-0.0388122	19.0499	0.005496	16.0649
-0.581146	41.642	0.00604	9.05539	0.015551	10.0226	0.0275714	17.2023	-0.0389306	19.1086	0.005544	16.0908
-0.566356	42.0104	0.006032	8.50613	0.0155633	10.8584	0.0277429	16.5383	-0.0390327	19.1317	0.005584	15.9768
-0.558016	42.2316	0.006048	8.6124	0.0155673	10.8756	0.0278653	16.4954	-0.0391469	19.2381	0.005624	15.8277
-0.548646	42.4528	0.005936	9.34814	0.0155918	10.0147	0.0281061	17.3054	-0.0392898	19.3517	0.005656	15.8329
-0.537556	42.6736	0.005912	10.2756	0.0155796	8.71971	0.0283796	17.524	-0.0394122	19.4046	0.00568	15.8653
-0.525006	42.8948	0.005984	10.8883	0.0155714	8.03194	0.0284612	17.125	-0.0395469	19.472	0.005704	15.7655
-0.504726	43.1896	0.006064	10.9583	0.0155878	8.5658	0.0284776	16.8819	-0.0396857	19.5408	0.005736	15.7266
-0.476626	43.4844	0.006112	10.6667	0.0156327	9.73851	0.0285796	17.3397	-0.0398163	19.5242	0.005728	15.7966
-0.458436	43.7052	0.006168	10.1524	0.0156531	10.6713	0.0288367	17.9303	-0.039951	19.593	0.005712	15.9534
-0.443826	43.8528	0.006248	9.72653	0.0156857	10.9191	0.0290408	17.6059	-0.0400898	19.6433	0.005736	16.1297
-0.422426	44.0736	0.006264	9.62698	0.0157224	10.3185	0.029151	17.0648	-0.0402122	19.7405	0.005736	16.3668
-0.396296	44.2948	0.00624	10.1371	0.0157265	9.14045	0.0292408	17.2835	-0.0403143	19.7424	0.005744	16.4187
-0.387966	44.3684	0.006192	10.8725	0.015698	8.50029	0.0294816	18.2309	-0.040449	19.9064	0.005848	16.2891
-0.372346	44.5156	0.006176	11.4254	0.0157265	9.06982	0.0297388	18.0373	-0.0406082	19.9778	0.005976	15.9625
-0.354936	44.6632	0.006184	11.5353	0.0157714	10.1983	0.0298122	17.1203	-0.0407592	20.0611	0.006064	15.5906
-0.344126	44.7368	0.006232	11.226	0.0157878	11.1492	0.029849	17.1342	-0.0409469	20.1278	0.006136	15.2321
-0.324656	44.8104	0.006248	10.5411	0.0157918	11.4148	0.0301224	18.4232	-0.0411347	20.2447	0.00616	15.0551
-0.320206	44.8104	0.00632	9.71347	0.0158082	10.8241	0.0305061	18.4172	-0.0413388	20.3028	0.006168	15.1068
-0.284026	44.2212	0.006432	9.04262	0.0157633	9.68109	0.0306653	17.4381	-0.0415143	20.3932	0.006112	15.4627
-0.278706	43.558	0.006552	8.76014	0.0157388	9.07587	0.0307469	17.3549	-0.0417184	20.5114	0.006008	16.0234
-0.278736	42.3788	0.006616	8.7433	0.0158041	9.62219	0.0309755	18.2878	-0.0419102	20.5384	0.006016	16.4511
-0.282556	38.9895	0.006648	8.83013	0.0159469	10.8907	0.031249	18.3585	-0.0421184	20.6362	0.006064	16.4602
-0.284816	36.8526	0.00664	8.8729	0.0160694	12.1037	0.0312694	17.5511	-0.0423224	20.726	0.006152	16.0519
-0.286496	35.1579	0.006592	9.02453	0.0162163	12.8926	0.0312408	17.3628	-0.0425388	20.8066	0.0062	15.5649
-0.289016	33.7579	0.006544	9.28632	0.0163184	13.1384	0.031298	17.9753	-0.0427469	20.8516	0.006224	15.2024
-0.292376	31.9895	0.006472	9.40296	0.0164041	13.3551	0.0315102	18.4119	-0.0429918	21.0306	0.006208	15.3086
-0.294506	30.6632	0.00648	9.20986	0.0165388	13.5607	0.0316327	18.1702	-0.0432041	21.0082	0.006136	15.9056
-0.295426	29.6316	0.006544	8.80037	0.0167224	13.9413	0.0317184	17.9772	-0.0434449	21.0961	0.006128	16.3591
-0.291987	39.8737	0.006632	8.19043	0.0168816	14.4565	0.0318286	18.1021	-0.043649	21.1338	0.006176	16.42
-0.292605	40.9052	0.006696	7.50662	0.0170531	14.8048	0.0319878	18.4939	-0.0438898	21.227	0.0062	16.3967
-0.297486	41.0528	0.006768	7.02989	0.0171878	14.8663	0.0321714	18.4867	-0.0440857	21.2561	0.006248	16.4394
-0.297736	40.5368	0.006824	6.70848	0.0173102	15.0644	0.0323224	17.9793	-0.0442816	21.4022	0.00628	16.4226
-0.298056	39.8737	0.006848	6.50251	0.0174735	15.33	0.0324082	17.9311	-0.0444449	21.4175	0.006352	16.2476
-0.298406	39.1368	0.006864	6.46363	0.0176694	15.6419	0.0326204	19.0284	-0.0446612	21.537	0.00632	16.2036
-0.298826	38.2526	0.006872	6.49723	0.0178776	15.6346	0.0329673	19.4301	-0.0448122	21.4828	0.006288	16.2943
-0.299076	36.5579	0.006888	6.47659	0.0181143	15.4628	0.0330898	18.708	-0.0450082	21.5574	0.006296	16.42
-0.301436	35.821	0.006928	6.29045	0.0183878	15.5679	0.0330653	18.2819	-0.0451959	21.566	0.006336	16.6063
-0.314086	35.728	0.006984	5.93194	0.0186531	15.6142	0.0331837	19.2042	-0.0453918	21.6401	0.006344	16.7462
-0.315426	34.1263	0.007016	5.56013	0.0188857	15.8323	0.0334408	19.4817	-0.045551	21.6619	0.006408	16.6868
-0.316926	32.6526	0.007056	5.33981	0.0191796	16.5252	0.0335265	18.4814	-0.0457184	21.726	0.006472	16.6027
-0.319646	31.179	0.00704	5.33462	0.0194571	16.8556	0.033502	18.0103	-0.0458857	21.7366	0.00648	16.6105
-0.322206	29.6316	0.006968	5.4733	0.0196204	16.7822	0.033702	19.438	-0.0460571	21.7841	0.006504	16.6351
-0.327056	28.0842	0.006904	5.82566	0.0197265	16.9091	0.0340531	19.8767	-0.0462	21.8197	0.00652	16.7203
-0.333296	26.6842	0.006864	6.3384	0.0199061	17.0782	0.0342082	18.9855	-0.0463673	21.8158	0.006536	16.7888
-0.336096	25.2105	0.006816	6.8304	0.0200612	17.104	0.0342245	18.7351	-0.0465184	21.9168	0.006592	16.6763
-0.338246	23.3684	0.0068	6.98323	0.0202082	17.2089	0.0344286	19.8999	-0.0466612	21.9168	0.006584	16.6867
-0.340536	21.6737	0.006816	6.83938	0.0204245	17.4638	0.034702	19.9078	-0.0467918	21.9425	0.006592	16.7977
-0.345346	19.0947	0.006832	6.4549	0.020698	17.5801	0.0347673	18.8024	-0.0469388	21.9293	0.0066	16.8418
-0.354606	15.4842	0.006888	5.91754	0.0209306	17.6059	0.0347469	18.7766	-0.0470653	21.9729	0.006624	16.8482
-0.362476	12.3158	0.007	5.3761	0.0211592	17.7229	0.0350776	20.2578	-0.0472	21.961	0.006632	17.0475
-0.369386	10.4	0.007112	5.05858	0.0213959	17.8354	0.0353714	20.0352	-0.0473265	22.0032	0.006672	17.1977
-0.377626	8.33684	0.007144	5.02099	0.0215796	17.8182	0.0354082	18.8506	-0.0474898	22.029	0.006712	17.2353
-0.384066	6.78948	0.007048	5.36184	0.0217224	17.8182	0.0353959	19.0059	-0.047649	22.0198	0.006728	17.1601
-0.392616	5.24212	0.00692	6.1571	0.0218408	17.9107	0.0356286	20.1224	-0.0477918	22.0482	0.006736	17.1873
-0.397446	4.50528	0.006752	7.25016	0.0219673	17.9987	0.0357673	19.6197	-0.0479429	22.1129	0.006744	17.1899
-0.403016	3.69474	0.006544	8.34715	0.0221224	17.9425	0.0357592	18.5923	-0.0480898	22.1492	0.006792	17.1562
-0.407336	3.17895	0.006376	9.15931	0.0222857	17.8995	0.0358245	19.3085	-0.0482082	22.1683	0.006824	17.1731
-0.412276	2.58947	0.006288	9.58699	0.0224776	17.9028	0.0361592	20.5175	-0.048351	22.342	0.006808	17.1938
-0.416276	2.14737	0.006296	9.62069	0.022702	17.9832	0.0363918	19.8879	-0.0484816	22.3275	0.006832	17.2677
-0.422446	1.5579	0.006288	9.38093	0.0229306	18.0228	0.0364163	18.9828	-0.0486449	22.424	0.006872	17.4504
-0.427076	1.11579	0.006256	9.066	0.0231265	18.2045	0.036551	19.9276	-0.0488	22.4755	0.006888	17.6137
-0.432306	0.673684	0.006256	8.84568	0.0233673	18.4259	0.0369633	20.6365	-0.0489469	22.5622	0.006928	17.5204
-0.438576	0.305263	0.006264	8.85605	0.0236082	18.5844	0.0371878	19.5239	-0.0490898	22.5965	0.007032	17.2095
-0.444136	0.157895	0.006264	9.32227	0.0238122	18.5712	0.0372245	18.9987	-0.049249	22.7017	0.007152	16.9816
		0.006256	9.95942	0.0239837	18.4814	0.0374898	20.5401	-0.0493959	22.7976	0.007168	17.0438
		0.00624	10.5293	0.0241306	18.4444	0.0378653	21.0178	-0.0495388	22.8571	0.007128	17.4854
		0.006232	10.896	0.0242531	18.5521	0.0379714	20.0908	-0.0497388	22.9787	0.00708	17.7809
		0.006256	11.172	0.0243755	18.5211	0.0379551	19.8741	-0.0499306	23.0329	0.007088	17.8768
		0.00628	11.3997	0.0245061	18.3288	0.0380857	20.8083	-0.050102	23.0971	0.007128	17.7692
		0.006256	11.4075	0.0246163	18.1953	0.0383102	20.8301	-0.0502816	23.1624	0.007144	17.6331
		0.006248	11.2095	0.0247755	18.1999	0.0384408	19.9025	-0.0504694	23.2826	0.007168	17.5243
		0.006256	11.0606	0.024951	18.2429	0.0384449	19.6105	-0.0506163	23.3241	0.007144	17.6215
		0.006256	11.2146	0.0251429	18.332	0.0386694	20.8466	-0.0508041	23.4218	0.007144	17.7705
		0.00624	11.5951	0.0253265	18.1603	0.039102	21.0428	-0.0510163	23.5334	0.007144	17.8884
		0.006248	11.9355	0.0255306	17.5604	0.0393102	19.9526	-0.0512163	23.6047	0.007152	17.8949
		0.006272	11.8747	0.0257102	16.5496	0.0393959	19.7062	-0.051449	23.6801	0.007208	17.939
		0.006344	11.3633	0.0258245	15.3425	0.0396449	20.7923	-0.051698	23.7989	0.007296	18.0906
		0.006376	10.603	0.0259184	14.3515	0.0399918	21.0566	-0.051951	23.9113	0.007344	18.3018
		0.006456	10.1016	0.0260041	14.5371	0.040102	20.3305	-0.0521918	24.0131	0.007376	18.3057
		0.006552	9.98885	0.0260857	15.4898	0.040098	20.1785	-0.0524122	24.1056	0.007408	18.1217
		0.00656	10.0627	0.026151	16.3256	0.040249	21.313	-0.0526245	24.1644	0.007424	17.8768
		0.006488	10.2973	0.0262082	16.5614	0.0406122	21.6928	-0.0528408	24.2259	0.007408	17.8716
		0.00644	10.8673	0.0262449	16.2232	0.0407878	20.7276	-0.0530857	24.3059	0.007376	18.1939
		0.006408	11.5356	0.0262612	15.1378	0.0408408	20.2942	-0.0533184	24.3648	0.007392	18.4448
		0.006344	11.8694	0.0262776	13.8785	0.041049	21.4325	-0.053551	24.419	0.007416	18.5069
		0.00636	11.7543	0.026302	13.494	0.0414735	21.7939	-0.0538041	24.5142	0.00744	18.4812
		0.0064	11.3025	0.0263429	14.2393	0.0416449	20.795	-0.0540204	24.5545	0.007512	18.4166
		0.00648	10.58	0.0263796	15.3671	0.0416653	20.4786	-0.0542	24.5823	0.007576	18.2978
		0.0066	9.79766	0.0264	16.1103	0.0418857	21.8138	-0.0544041	24.6609	0.007616	18.2992
		0.00672	9.15014	0.0264327	16.1367	0.0422653	22.0437	-0.0546082	24.7263	0.007672	18.4776
		0.006816	8.63962	0.026449	15.3294	0.0423551	20.8228	-0.0548122	24.7355	0.007688	18.678
		0.006848	8.30914	0.0264531	14.0952	0.042351	20.5487	-0.0550041	24.7963	0.00772	18.7466
		0.006856	8.20286	0.0264653	13.1735	0.0425347	21.6863	-0.0552082	24.8471	0.0078	18.5772
		0.006848	8.18616	0.0264735	13.3492	0.0428735	21.8132	-0.0554122	24.8663	0.007824	18.4464
		0.006856	7.97021	0.0264939	14.3409	0.0430122	20.8334	-0.0556245	24.9191	0.007752	18.6145
		0.006896	7.57282	0.0265184	15.5004	0.043102	20.8724	-0.0558122	24.9666	0.007712	18.8048
		0.006976	7.11154	0.0265469	16.2403	0.0433837	22.3046	-0.0560367	24.9889	0.00776	18.8411
		0.007	6.70334	0.0265714	16.138	0.0438082	22.2696	-0.0562286	25.0101	0.007832	18.7763
		0.007016	6.40963	0.0265918	15.1655	0.043902	20.9918	-0.0564122	25.0536	0.007864	18.8191
		0.007024	6.31003	0.0265959	13.9921	0.0439102	21.4133	-0.0565918	25.0562	0.007872	18.9577
		0.007072	6.33715	0.0266	13.2739	0.0442163	22.8925	-0.0567796	25.1176	0.007872	18.9616
		0.007104	6.31776	0.0266122	13.6023	0.0444327	22.4248	-0.0569306	25.1487	0.007912	18.8605
		0.007128	6.07066	0.0266286	14.6898	0.044351	21.3684	-0.0571102	25.2035	0.007968	18.74
		0.00716	5.71435	0.0266449	15.9287	0.0443755	22.1282	-0.0572612	25.162	0.007992	18.8281
		0.007176	5.40461	0.0266898	16.7327	0.0446653	23.0544	-0.0573878	25.1818	0.007992	19.1236
		0.007168	5.31389	0.0267388	16.588	0.0448653	22.3575	-0.0575265	25.2445	0.008032	19.2325
		0.007176	5.41368	0.0267673	15.601	0.0449388	21.5448	-0.0576612	25.2828	0.008072	19.1599
		0.007176	5.56142	0.0268082	14.5293	0.0451102	22.2994	-0.0577837	25.2914	0.008096	19.0679
		0.007176	5.58216	0.0268327	14.0853	0.0454449	23.0875	-0.0579224	25.3752	0.00808	19.0342
		0.007176	5.5044	0.0268327	14.5055	0.0456571	22.3053	-0.0580571	25.3964	0.008072	18.9668
		0.00724	5.37091	0.0268408	15.589	0.0456898	21.5621	-0.0581796	25.4129	0.008104	19.0342
		0.007256	5.09496	0.0268408	16.6725	0.0457673	22.0734	-0.0583143	25.3879	0.008096	19.296
		0.007304	4.77792	0.0268531	17.0213	0.0460122	22.88	-0.0584531	25.4646	0.00816	19.3478
		0.007312	4.61246	0.0268531	16.383	0.0461959	22.7169	-0.0585837	25.4851	0.008312	19.1301
		0.007304	4.66786	0.0268531	15.3073	0.0463143	22.4632	-0.0587592	25.5737	0.008416	18.8839
		0.007256	4.88899	0.0268694	14.389	0.0464327	22.5867	-0.0589061	25.5637	0.00844	18.9046
		0.0072	5.2465	0.0268816	14.3665	0.0466082	23.0393	-0.0590571	25.6973	0.008312	19.2092
		0.00712	5.72602	0.0268816	15.2346	0.0468204	23.0374	-0.0592082	25.7098	0.00828	19.3841
		0.007	6.1379	0.0268898	16.2746	0.0469673	22.3469	-0.0593796	25.8136	0.008368	19.4282
		0.006968	6.25066	0.0269306	16.8112	0.0470286	22.1362	-0.059502	25.8269	0.008392	19.4217
		0.007024	5.97874	0.0269429	16.6672	0.0472041	23.1701	-0.0596694	25.9637	0.00836	19.4269
		0.007128	5.48496	0.0269633	15.7455	0.0475102	23.5566	-0.0598367	25.9948	0.008456	19.2921
		0.007256	4.96296	0.0270286	14.5867	0.0476204	22.5537	-0.0600367	26.1323	0.008528	19.2105
		0.007336	4.63296	0.0271143	13.9392	0.047551	22.1494	-0.0602327	26.2162	0.008504	19.3971
		0.007376	4.56187	0.0272041	14.372	0.0476163	23.0961	-0.0604571	26.3423	0.008416	19.5876
		0.007296	4.97352	0.0273184	15.4719	0.0478735	23.4225	-0.0606776	26.4195	0.008432	19.5928
		0.00712	5.91869	0.0274408	16.6275	0.0479918	22.5637	-0.0608694	26.5007	0.008472	19.5435
		0.006896	7.06502	0.0275469	17.2585	0.0480449	22.1997	-0.0610571	26.5805	0.008528	19.55
		0.006688	8.10883	0.0276367	17.1177	0.0482204	23.1101	-0.061249	26.5976	0.00856	19.515
		0.00656	8.72136	0.0276898	16.1828	0.0485184	23.6142	-0.0613959	26.6353	0.008584	19.5656
		0.006496	8.87938	0.027751	15.0253	0.0486408	23.1002	-0.0615918	26.6882	0.008576	19.6446
		0.00648	8.73422	0.0277918	14.5542	0.0486816	22.7024	-0.0617959	26.7727	0.008584	19.7146
		0.006496	8.61758	0.0278449	15.1482	0.0487714	23.2567	-0.0619918	26.7992	0.008664	19.7366
		0.006448	8.75107	0.0278857	16.1644	0.0490694	23.8447	-0.0621878	26.8408	0.008736	19.747
		0.006392	9.16306	0.0279265	16.9315	0.0492939	23.2646	-0.0624163	26.9082	0.008712	19.7833
		0.006344	9.65506	0.0279551	17.131	0.0493918	22.5233	-0.0626204	27.022	0.008776	19.7677
		0.0064	9.92414	0.0279714	16.4988	0.049498	23.2224	-0.0628408	27.0729	0.008832	19.7055
		0.006456	9.88166	0.0279714	15.2811	0.0498245	24.2114	-0.0630653	27.1634	0.008792	19.6265
		0.006472	9.69941	0.0279714	14.3291	0.0499633	23.7443	-0.0633102	27.3174	0.008808	19.5552
		0.006448	9.61162	0.028	14.4698	0.0499959	23.071	-0.0635388	27.3994	0.008776	19.5928
		0.006408	9.64915	0.0280408	15.4489	0.0500408	23.4047	-0.0637592	27.4391	0.008784	19.8258
		0.006392	9.87418	0.0280898	16.6057	0.0502245	24.169	-0.0639878	27.5382	0.008816	20.0159
		0.006416	10.1835	0.0281388	17.5347	0.0503429	23.9377	-0.0642082	27.5614	0.008912	19.9693
		0.006424	10.296	0.0281918	17.5902	0.0503918	23.2229	-0.0644163	27.6202	0.009024	19.8026
		0.006432	10.0384	0.0282286	16.6691	0.0504041	23.5044	-0.0646	27.5858	0.009096	19.7081
		0.006488	9.66691	0.0282571	15.4964	0.0505878	24.65	-0.0648082	27.6453	0.009112	19.6019
		0.006496	9.42499	0.0282939	14.8285	0.050849	24.1235	-0.0649878	27.6162	0.009048	19.5617
		0.006528	9.37315	0.0283429	14.9197	0.0509061	22.8874	-0.0651755	27.6883	0.008976	19.7028
		0.00652	9.47424	0.0283837	15.8697	0.0509918	23.4761	-0.0653388	27.6968	0.008952	19.9706
		0.00652	9.57403	0.0284449	17.1409	0.0513143	24.6976	-0.0655347	27.7649	0.009024	20.0521
		0.006512	9.57144	0.028498	17.8227	0.0515592	23.9603	-0.065702	27.7564	0.009112	19.8775
		0.006488	9.51442	0.0285306	17.4633	0.0515592	23.151	-0.0658694	27.8013	0.009144	19.6965
		0.006464	9.45221	0.0285469	16.3764	0.0516612	24.3105	-0.0660367	27.8125	0.00908	19.7625
		0.006464	9.41203	0.0285714	15.0696	0.0519633	24.8892	-0.0662	27.7901	0.009072	19.9525
		0.006496	9.28114	0.0285714	13.834	0.0521265	23.7159	-0.0663714	27.8323	0.009096	20.0043
		0.006536	9.0025	0.0285714	13.5103	0.0521673	23.2667	-0.0665347	27.8501	0.0092	19.8362
		0.00664	8.42486	0.0285755	14.2384	0.0523837	24.7373	-0.0666857	27.8363	0.00924	19.7922
		0.0068	7.59072	0.0285837	15.4362	0.052698	24.6514	-0.0668449	27.8758	0.009216	20.0717
		0.00692	6.75941	0.0285755	16.4815	0.0527551	23.4186	-0.0669959	27.8467	0.009224	20.241
		0.007024	6.19742	0.0285714	16.6771	0.0527714	23.8665	-0.0671306	27.848	0.009288	20.0522
		0.007104	5.88413	0.0285633	16.0495	0.0530612	25.1363	-0.0672571	27.8916	0.009384	19.6289
		0.007168	5.64048	0.0285429	14.9581	0.053249	23.8916	-0.0673959	27.848	0.009416	19.4697
		0.007184	5.43312	0.0285388	14.09	0.0532449	23.2454	-0.0675265	27.8487	0.009424	19.6833
		0.00716	5.39035	0.0285592	14.1349	0.0534653	24.8238	-0.0676408	27.8969	0.0094	20.0988
		0.007112	5.3761	0.0285837	14.9271	0.0538286	25.4924	-0.0677633	27.9352	0.009432	20.32
		0.007144	5.19466	0.0286204	15.1794	0.0540367	24.7723	-0.0678612	27.8976	0.009496	20.3238
		0.007256	4.84766	0.0286612	14.954	0.0541265	24.6778	-0.067951	27.9828	0.00952	20.1854
		0.007336	4.48267	0.0286735	14.506	0.054302	25.3695	-0.0680612	28.0263	0.00952	19.9293
		0.007384	4.19146	0.0286653	14.2404	0.054498	25.2863	-0.0681837	28.1101	0.009632	19.7924
		0.007392	4.00354	0.0286694	14.2166	0.0546122	24.5483	-0.0682776	28.1148	0.009632	19.9592
		0.007432	3.85709	0.0286612	14.2754	0.0546204	24.0857	-0.0684041	28.2092	0.009544	20.2166
		0.007432	3.78062	0.0286694	14.1697	0.0547673	25.1058	-0.0685184	28.2164	0.009536	20.3783
		0.007424	3.84672	0.0286816	13.9577	0.0550735	25.384	-0.0686449	28.2897	0.00956	20.3472
		0.007424	3.97114	0.0286898	13.7562	0.0552163	24.311	-0.0687551	28.3115	0.009584	20.2551
		0.007424	4.0139	0.0287224	13.6941	0.0552816	23.9959	-0.0688898	28.406	0.0096	20.0508
		0.007408	3.97762	0.028751	13.7093	0.0554776	25.3728	-0.0689796	28.3637	0.0096	20.0353
		0.007392	3.81821	0.0287388	13.6412	0.0557796	25.4997	-0.0691306	28.482	0.009568	20.315
		0.007384	3.55901	0.0287551	13.5659	0.0558816	24.4042	-0.069249	28.4854	0.00956	20.5441
		0.00744	3.31666	0.0287878	13.5097	0.0559224	24.6626	-0.0693714	28.57	0.009584	20.4186
		0.007472	3.1715	0.0287959	13.5058	0.0561714	26.0777	-0.0695265	28.6354	0.009672	20.0575
		0.007504	3.1093	0.0288163	13.6631	0.0564653	25.6899	-0.0697143	28.8086	0.009752	19.8234
		0.007504	3.1728	0.0288857	13.6756	0.056551	24.6309	-0.0698776	28.8562	0.0098	19.8932
		0.00752	3.35813	0.0289102	13.3664	0.0566327	25.4389	-0.0700531	28.9878	0.009784	20.1714
		0.007488	3.6912	0.0289306	13.0585	0.0569878	26.5284	-0.0702408	29.0466	0.009656	20.548
		0.007384	4.13962	0.0289796	13.0915	0.0572367	25.497	-0.0704082	29.1279	0.00968	20.7502
		0.007232	4.54867	0.0290449	13.2515	0.0573347	24.7835	-0.0705755	29.2139	0.009768	20.6362
		0.007136	4.76203	0.0290531	13.3598	0.0575592	26.1002	-0.0707837	29.2582	0.00992	20.2504
		0.007112	4.79549	0.0290939	13.2799	0.0579592	26.597	-0.0709837	29.3314	0.009976	20.0573
		0.007104	4.74365	0.0291429	13.0639	0.0581592	25.4164	-0.0711796	29.4312	0.009944	20.2463
		0.007048	4.71398	0.0291633	13.0579	0.058249	25.316	-0.0713837	29.4536	0.00992	20.5273
		0.007056	4.67818	0.0292	13.3902	0.0584612	26.5819	-0.0715918	29.544	0.00988	20.7541
		0.007032	4.64755	0.0292653	13.6882	0.0587306	26.4768	-0.0717551	29.6067	0.009888	20.8176
		0.007104	4.62168	0.029298	13.675	0.0588082	25.3219	-0.0719306	29.6549	0.00992	20.7839
		0.007144	4.63694	0.0293224	13.2865	0.0588408	25.5135	-0.0721469	29.7228	0.009984	20.5817
		0.007128	4.79981	0.0293388	13.3214	0.0590245	26.7728	-0.0723429	29.7974	0.01	20.5053
		0.007008	5.2439	0.0293347	13.6267	0.0592939	26.4874	-0.0725388	29.806	0.009968	20.7372
		0.006872	5.92915	0.0293469	13.7562	0.0594367	25.4838	-0.0727633	29.9209	0.00996	20.955
		0.006688	6.71794	0.0293796	13.8664	0.0595265	25.7983	-0.0729673	29.9394	0.01004	20.8383
		0.006576	7.41221	0.0294	14.1577	0.0597673	27.008	-0.0731673	29.9824	0.01004	20.5947
		0.006512	7.86946	0.0294327	14.2344	0.0600327	26.3908	-0.0733429	30.0055	0.010072	20.5752
		0.006464	8.04014	0.0294694	14.4458	0.0600939	25.3998	-0.0735388	30.0835	0.010072	20.8513
		0.006424	8.00909	0.0294939	14.7101	0.0601673	25.7943	-0.0737347	30.0782	0.010144	20.9757
		0.0064	7.84493	0.0295102	14.8259	0.0604327	26.8639	-0.0739102	30.1331	0.010152	20.9744
		0.006464	7.74398	0.0295224	14.8041	0.0606653	26.0407	-0.0740694	30.145	0.010176	20.9744
		0.006472	7.79712	0.0295347	14.89	0.0607265	25.3688	-0.0742571	30.1854	0.0102	21.0457
		0.006456	8.10379	0.0295347	15.0664	0.0608531	26.2779	-0.0744204	30.1655	0.010216	21.1144
		0.006392	8.58413	0.0295633	15.2613	0.0611143	27.3495	-0.0745592	30.2297	0.010224	21.1377
		0.0064	9.02712	0.0296	15.291	0.0612735	26.3797	-0.0747184	30.2436	0.010256	21.1662
		0.006496	9.23189	0.0296531	15.1305	0.0612571	25.8908	-0.0748939	30.2918	0.010248	21.1857
		0.006544	9.17486	0.0297102	15.1404	0.0613388	26.9168	-0.0750531	30.3275	0.01028	21.2077
		0.006512	8.92862	0.0297755	15.262	0.0616163	27.3331	-0.0751959	30.346	0.010312	21.231
		0.00648	8.55163	0.0298	15.4106	0.0617878	26.1056	-0.0753592	30.3659	0.010336	21.2505
		0.006552	8.21885	0.0298367	15.412	0.0618612	25.9457	-0.0755388	30.4221	0.010368	21.2634
		0.006608	8.15794	0.0298531	15.3274	0.0621143	27.3932	-0.0756898	30.4267	0.010368	21.2764
		0.00656	8.59042	0.0298449	15.3162	0.0624449	27.0734	-0.0758082	30.3884	0.010416	21.2945
		0.006496	9.22253	0.0298367	15.3505	0.0624898	25.797	-0.0759633	30.4307	0.010448	21.3088
		0.006424	9.70546	0.0298449	15.4272	0.0625347	26.6459	-0.0761224	30.473	0.010496	21.323
		0.006472	9.76766	0.029849	15.4562	0.0628	27.7836	-0.0762204	30.4604	0.01052	21.3386
		0.006512	9.51154	0.0298612	15.1332	0.0629429	26.5759	-0.0763592	30.518	0.010584	21.358
		0.006624	8.91706	0.0298816	14.8444	0.0629184	26.2138	-0.0764898	30.5907	0.010552	21.3762
		0.006736	8.16974	0.0298898	14.9448	0.0630939	27.7511	-0.0766367	30.6343	0.010568	21.3969
		0.006832	7.27742	0.0299102	15.3776	0.0633755	27.9666	-0.0767592	30.6317	0.010568	21.4112
		0.006984	6.46286	0.0299143	15.4569	0.0634939	26.8587	-0.0768857	30.6595	0.010536	21.4267
		0.00708	5.91125	0.0299102	15.11	0.0635429	26.856	-0.0770204	30.6667	0.01056	21.4449
		0.007152	5.71435	0.029902	14.5781	0.0637184	27.8874	-0.0771796	30.7315	0.010616	21.4578
		0.007176	5.79082	0.0299061	14.3997	0.0639184	27.4058	-0.0773061	30.7334	0.010648	21.4708
		0.007232	5.93078	0.0299102	14.4948	0.0639388	26.1743	-0.077449	30.8107	0.010712	21.4863
		0.007136	5.98133	0.0299184	14.4624	0.0639592	26.8706	-0.0776163	30.8589	0.010744	21.5045
		0.007168	5.92301	0.0299102	14.3157	0.0641673	28.1886	-0.0777714	30.9157	0.010776	21.5174
		0.00724	5.79082	0.0299102	14.2847	0.0643469	27.7889	-0.0779306	30.9599	0.01076	21.5317
		0.007264	5.51477	0.0299592	14.175	0.064351	26.9776	-0.0780898	31.0781	0.010768	21.5447
		0.007232	5.17003	0.0299796	14.1367	0.0644245	27.4453	-0.0782898	31.1019	0.010768	21.5666
		0.007208	4.93286	0.0300041	14.1063	0.0646449	28.0367	-0.0784612	31.1791	0.0108	21.5874
		0.007296	4.86806	0.0300367	13.9967	0.0648449	27.2234	-0.0786286	31.2708	0.0108	21.608
		0.007336	4.86038	0.0300571	13.6531	0.0649388	26.2832	-0.0788327	31.3838	0.010736	21.6272
		0.007384	4.70146	0.0300571	13.4932	0.0650408	26.9095	-0.0790204	31.4175	0.010736	21.6463
		0.007432	4.46866	0.0300735	13.5064	0.065298	27.9745	-0.0791959	31.5635	0.010752	21.6565
		0.007432	4.27829	0.030098	13.4913	0.065502	27.1903	-0.0793959	31.6316	0.01088	21.6732
		0.007472	4.09555	0.0300939	13.3604	0.0655347	26.6353	-0.0796	31.703	0.010928	21.6938
		0.007504	3.89467	0.0300939	13.2183	0.0656367	27.5755	-0.0797918	31.7354	0.010912	21.7145
		0.007504	3.83117	0.0300898	13.1575	0.0658816	28.3802	-0.0800163	31.8452	0.01088	21.7288
		0.00748	3.89338	0.0300816	13.0082	0.0660286	27.5451	-0.0802449	31.8961	0.010872	21.7392
		0.007472	3.99706	0.0300612	12.8648	0.0660408	26.9775	-0.0804816	31.9939	0.010904	21.7573
		0.007472	4.0476	0.0300531	12.8125	0.0661265	28.0637	-0.080702	32.0554	0.010952	21.7716
		0.00748	4.02168	0.030049	12.7307	0.0663347	28.6213	-0.0809347	32.1606	0.011	21.7949
		0.007488	3.86486	0.0300286	12.6752	0.066449	27.9356	-0.0811714	32.2266	0.011032	21.8104
		0.007536	3.61862	0.0300082	12.8404	0.0664531	27.4064	-0.0813878	32.2531	0.01104	21.8234
		0.007616	3.38794	0.0300082	12.9428	0.0665306	28.3802	-0.0816245	32.3515	0.01104	21.8428
		0.007632	3.31536	0.0299714	12.8245	0.0667837	28.6571	-0.0818449	32.3799	0.01108	21.8558
		0.007576	3.35813	0.0299673	12.5807	0.0669551	27.4381	-0.0820735	32.4485	0.011136	21.8726
		0.007584	3.52661	0.0299837	12.5563	0.0670327	27.306	-0.0823061	32.4908	0.011192	21.8869
		0.007536	3.83506	0.0300367	12.7413	0.0673184	28.9246	-0.0825551	32.5719	0.011216	21.9167
		0.007456	4.32202	0.0300857	12.8919	0.0676408	28.548	-0.0827755	32.6221	0.011232	21.9271
		0.00736	4.82827	0.0301429	12.8899	0.0677184	27.3086	-0.0830082	32.7046	0.01124	21.9465
		0.007176	5.2776	0.0301755	12.6758	0.0678	28.4093	-0.0832408	32.7653	0.011248	21.9608
		0.006992	5.67288	0.0301878	12.6706	0.0681224	29.0065	-0.0834327	32.8194	0.011248	21.9828
		0.006872	5.98392	0.0301755	12.8173	0.0682776	27.5702	-0.0836286	32.8669	0.01128	21.9984
		0.006816	6.29194	0.0301837	13.1199	0.0683592	28.0842	-0.0838163	32.8801	0.011336	22.0087
		0.006736	6.666	0.0301878	13.3255	0.0686204	29.5033	-0.0840122	32.9251	0.011336	22.023
		0.00664	7.10635	0.0302	13.2706	0.0688612	28.7568	-0.0841796	32.9047	0.011328	22.0372
		0.006552	7.45627	0.0302	13.27	0.0688449	27.9798	-0.084351	32.9205	0.011392	22.0606
		0.006496	7.66882	0.0302245	13.5284	0.0689714	29.4616	-0.0845184	32.9053	0.011432	22.0813
		0.006448	7.80221	0.0302531	13.9116	0.0692204	29.6215	-0.0846898	32.9132	0.011432	22.1046
		0.006432	8.0376	0.0302776	14.0958	0.0693673	28.5168	-0.0848694	32.9483	0.011392	22.1176
		0.006416	8.40778	0.0302939	14.3515	0.0694531	28.4977	-0.0850408	32.9469	0.011392	22.137
		0.00644	8.61758	0.0303429	14.5629	0.0697265	29.7643	-0.0851918	32.9542	0.011408	22.1539
		0.006472	8.83272	0.0303429	14.6428	0.0700204	29.0263	-0.0853429	32.9925	0.011456	22.1629
		0.006472	9.18134	0.030351	14.6468	0.0701714	27.9566	-0.0854653	32.9522	0.011488	22.1785
		0.006456	9.4885	0.0303837	14.7823	0.0703347	28.8426	-0.0855796	32.9509	0.011496	22.194
		0.00648	9.51701	0.0304041	14.8689	0.0706735	29.7742	-0.085702	32.9655	0.01148	22.2161
		0.006472	9.43277	0.0304449	14.9971	0.0708612	28.3808	-0.085849	32.9919	0.01148	22.2329
		0.006512	9.62285	0.0305102	15.1795	0.0708735	28.2242	-0.0859755	32.9536	0.01152	22.2485
		0.006568	9.97877	0.0305755	15.2786	0.0710612	29.7571	-0.0861224	33.0401	0.011576	22.2601
		0.006584	10.2429	0.0306204	15.2931	0.0712367	29.7934	-0.0862694	33.0474	0.011592	22.2796
		0.0066	10.2364	0.0306898	15.3757	0.0712571	28.7238	-0.0864	33.1598	0.011616	22.2977
		0.006608	10.1599	0.0307633	15.4998	0.071298	28.9484	-0.0865306	33.1869	0.011672	22.3198
		0.0066	10.3621	0.0308449	15.4139	0.0715102	29.9163	-0.0866449	33.0774	0.01164	22.334
		0.006592	10.6835	0.0309102	15.2348	0.0717265	29.4036	-0.086698	32.7946	0.011648	22.3457
		0.006608	10.8105	0.0309755	15.3788	0.0718816	28.4529	-0.086702	32.4834	0.01168	22.356
		0.006632	10.7418	0.0310041	15.651	0.0720204	28.9002	-0.0867469	32.2839	0.011704	22.3755
		0.006664	10.8507	0.0310163	15.62	0.0723102	30.1171	-0.0867347	31.9165	0.01172	22.3962
		0.00672	11.0853	0.0310286	15.5744	0.072551	29.2741	-0.0867224	31.6891	0.011696	22.4079
		0.006776	11.071	0.0310286	15.69	0.0726245	28.4575	-0.0868082	31.845	0.011728	22.4221
		0.006832	10.5385	0.0310286	15.6398	0.0727755	29.6467	-0.086902	31.8536	0.011736	22.439
		0.006872	9.79642	0.0310531	15.4575	0.0730694	30.4164	-0.0868776	31.5326	0.011792	22.4675
		0.006904	9.1476	0.0310898	15.4516	0.0732204	29.0475	-0.0869347	31.6788	0.011816	22.4831
		0.006952	8.89622	0.0311347	15.626	0.0732408	28.9338	-0.0870286	31.8558	0.011848	22.496
		0.006976	8.95325	0.0311959	15.8268	0.0734204	30.3893	-0.087049	31.7052	0.01188	22.5168
		0.006984	9.2111	0.031249	15.6721	0.0736367	29.9863	-0.0870776	31.7885	0.011872	22.5271
		0.006968	9.62146	0.0312857	15.0748	0.0736857	28.7489	-0.0871633	32.0058	0.011896	22.5479
		0.006936	9.97608	0.0313061	14.8752	0.0737265	29.3685	-0.0871837	31.8994	0.011936	22.5673
		0.006896	9.95146	0.0313143	15.2367	0.0739347	30.4164	-0.0872	31.8842	0.011928	22.588
		0.006936	9.51907	0.0313184	15.4785	0.0741265	29.3276	-0.0872408	31.9086	0.011936	22.6114
		0.007024	8.87933	0.0313265	15.3339	0.0741469	28.7079	-0.0872653	31.8035	0.011952	22.6308
		0.007144	8.22408	0.031351	14.8787	0.0742939	30.0709	-0.0873429	31.8999	0.011952	22.6476
		0.00724	7.6621	0.0313551	14.51	0.0745469	30.6655	-0.0874163	31.9198	0.01196	22.6606
		0.00736	7.18152	0.0313551	14.4942	0.0746939	29.5192	-0.0874694	31.9085	0.01208	22.6723
		0.007392	6.77587	0.0313755	14.9045	0.0747347	29.5839	-0.0875306	31.9178	0.012088	22.6813
		0.007432	6.45485	0.0313837	15.1728	0.0749796	30.8947	-0.0876245	32.1305	0.011984	22.6969
		0.00744	6.21427	0.0313755	14.9613	0.0752041	29.5958	-0.087649	31.9832	0.012016	22.7189
		0.007456	6.13037	0.0313755	14.214	0.0752408	28.8063	-0.0876694	31.795	0.012072	22.7319
		0.007464	6.1835	0.0313918	13.9305	0.0753347	30.0054	-0.087702	31.7626	0.012112	22.7487
		0.007464	6.20424	0.0314041	14.0917	0.0755388	30.0325	-0.0877388	31.8663	0.012064	22.7643
		0.00748	6.02798	0.0314163	14.1307	0.075502	28.5804	-0.0877347	31.5808	0.012048	22.7902
		0.007512	5.7325	0.0314327	13.9993	0.0754776	29.2694	-0.0877755	31.7565	0.012048	22.8006
		0.007528	5.45774	0.0314327	13.743	0.0756122	29.9757	-0.0878694	32.067	0.012064	22.82
		0.007528	5.40461	0.0314204	13.5369	0.0756612	28.8969	-0.0878694	31.8819	0.012032	22.842
		0.007512	5.47978	0.0314122	13.572	0.0755796	28.402	-0.0879143	31.8924	0.012016	22.8589
		0.007504	5.51736	0.0314204	14.0028	0.0755673	29.393	-0.0879837	32.0821	0.012032	22.877
		0.007544	5.42405	0.0314245	14.2822	0.0756245	29.6837	-0.0880327	32.03	0.012064	22.8926
		0.007568	5.22058	0.0314204	14.144	0.075551	28.2857	-0.0880816	32.1463	0.012072	22.9068
		0.007616	5.07154	0.0314204	13.6716	0.0754327	28.2711	-0.0881714	32.266	0.012024	22.9172
		0.007584	5.07413	0.0314367	13.6385	0.0754776	29.5541	-0.0882	32.1452	0.012008	22.9354
		0.007576	5.14282	0.0314735	13.9134	0.0755714	29.0923	-0.0882531	32.2416	0.012088	22.9587
		0.00756	5.20762	0.0314939	13.9927	0.075502	27.8126	-0.0882653	32.0757	0.012176	22.9781
		0.007568	5.2465	0.0315306	13.9669	0.0754776	28.5823	-0.0882694	31.8662	0.012232	22.9937
		0.007552	5.29963	0.031551	13.8626	0.0756	29.4379	-0.0882735	31.8827	0.012344	23.0092
		0.007512	5.42794	0.0315592	13.8658	0.0756367	28.3669	-0.0882939	31.892	0.0124	23.0287
		0.007488	5.74546	0.0315388	14.2179	0.0755469	27.7981	-0.0883184	31.7942	0.01244	23.0429
		0.007424	6.20765	0.0315224	14.726	0.0755878	29.1042	-0.0883306	31.6423	0.012336	23.0611
		0.007376	6.60634	0.0315143	14.9085	0.0757184	29.3474	-0.0883061	31.4026	0.012312	23.0753
		0.007312	6.77198	0.0315061	14.5755	0.0756735	28.0763	-0.0883102	31.2578	0.01228	23.0896
		0.007344	6.83938	0.031551	14.4295	0.0755878	28.0981	-0.0882776	30.8832	0.012336	23.109
		0.00728	7.11542	0.0316571	14.6429	0.0756408	29.2483	-0.0882612	30.7392	0.012352	23.1298
		0.007176	7.59744	0.0317796	15.0255	0.075698	28.8103	-0.0882612	30.8138	0.012384	23.1388
		0.00704	8.15942	0.0318694	15.2216	0.0756	27.6601	-0.088249	30.6882	0.012392	23.1479
		0.006936	8.67086	0.031951	15.4958	0.0755796	28.3062	-0.0881633	30.3506	0.012416	23.1647
		0.006888	9.11654	0.0319918	15.8089	0.0756776	29.2641	-0.088102	30.1545	0.012432	23.1879
		0.006872	9.38093	0.0319837	15.947	0.075698	28.3048	-0.0879837	29.7039	0.012424	23.2034
		0.006872	9.41333	0.0319633	15.9562	0.0755796	27.7029	-0.087849	29.246	0.012424	23.2213
		0.006872	9.33168	0.0319633	16.0441	0.0755918	29.0652	-0.0877837	29.0538	0.012448	23.2314
		0.006848	9.43267	0.0319918	15.9041	0.0756571	29.3414	-0.0876898	28.7644	0.012488	23.2557
		0.006832	9.65256	0.0319959	15.7197	0.0756	28.0287	-0.0875673	28.5688	0.012616	23.2738
		0.006848	9.84922	0.0319878	15.8294	0.0755347	27.9349	-0.0874612	28.3547	0.012632	23.2957
		0.006824	10.1135	0.0319918	15.9999	0.0756204	28.9451	-0.0873592	28.1268	0.01256	23.3074
		0.006816	10.5384	0.0319837	16.1677	0.0757061	28.8566	-0.0872449	27.8619	0.012568	23.3294
		0.00684	10.8053	0.0319837	16.3375	0.0757265	28.108	-0.0871796	27.7013	0.012576	23.3541
		0.006864	10.8066	0.0319918	16.4499	0.0757265	28.2771	-0.0871347	27.4727	0.012584	23.3735
		0.006864	10.6718	0.0320612	16.4307	0.0758245	29.3474	-0.0870449	27.2506	0.0126	23.3942
		0.006872	10.6641	0.0321306	16.1486	0.0758857	29.0944	-0.0869959	27.376	0.012624	23.4111
		0.006864	10.962	0.0322327	16.0839	0.0758531	27.8887	-0.0869429	27.421	0.012632	23.4279
		0.006824	11.3736	0.0323429	16.6765	0.0757878	28.3445	-0.0868898	27.3456	0.01264	23.437
		0.006832	11.5134	0.0324449	16.7809	0.075902	29.5628	-0.0868122	27.2465	0.012624	23.4513
		0.006864	11.2365	0.032502	16.4062	0.0759347	28.7092	-0.0868204	27.4349	0.012616	23.4694
		0.006912	10.6809	0.0325551	16.3785	0.0758367	27.738	-0.0867592	27.1218	0.012632	23.485
		0.006944	10.2156	0.032551	16.4644	0.0758367	29.0685	-0.0866939	26.8741	0.01264	23.5031
		0.006976	9.97589	0.0325633	16.3091	0.0759429	29.7286	-0.0866776	26.9548	0.012608	23.52
		0.006968	10.0912	0.0325714	16.3931	0.0759469	28.8149	-0.0867143	27.2408	0.01268	23.5329
		0.006984	10.4178	0.0326041	16.5516	0.0758939	28.4739	-0.086702	27.1826	0.01276	23.5511
		0.00692	10.9399	0.0326204	16.5325	0.0759551	29.7887	-0.0867184	27.3412	0.0128	23.5679
		0.006872	11.3582	0.0326776	16.4076	0.0760653	29.537	-0.0867592	27.6193	0.012808	23.5835
		0.006888	11.3491	0.0326898	16.366	0.0760694	28.2315	-0.0868	27.8275	0.012768	23.5977
		0.006896	10.9245	0.032698	16.1578	0.0760408	28.949	-0.0868122	27.7998	0.012888	23.6159
		0.006896	10.2885	0.0327061	15.9279	0.0761673	30.1066	-0.0868612	28.0257	0.012864	23.6379
		0.006976	9.60725	0.0327388	15.799	0.0762204	28.8552	-0.0869429	28.2807	0.012792	23.656
		0.00712	8.98694	0.0327306	15.7124	0.0761306	28.1773	-0.0870286	28.5879	0.012832	23.6729
		0.007256	8.43643	0.0327429	15.5129	0.0761796	29.5813	-0.0870857	28.806	0.01288	23.6936
		0.007304	8.06626	0.0327592	15.4826	0.0763347	29.3712	-0.0872122	29.2777	0.012864	23.7118
		0.007352	7.82045	0.0327673	15.552	0.0763429	28.0993	-0.0872898	29.5029	0.012872	23.726
		0.0074	7.62605	0.0327837	15.4542	0.0763755	28.8538	-0.0873959	29.9034	0.012928	23.739
		0.007464	7.3824	0.0328367	15.1682	0.0765551	29.8977	-0.0874816	30.1167	0.012936	23.7571
		0.007496	7.02211	0.032898	14.7816	0.0766612	28.9073	-0.0875837	30.3506	0.012928	23.7766
		0.007472	6.75125	0.0329714	14.7533	0.0765755	28.1092	-0.087649	30.5059	0.012912	23.796
		0.00744	6.65664	0.0330327	14.8319	0.0765959	29.4141	-0.0877429	30.7723	0.012944	23.8116
		0.007432	6.58166	0.0330653	14.7618	0.0766776	29.7166	-0.0878204	30.8772	0.012968	23.8323
		0.007456	6.28406	0.033098	14.5575	0.0766653	28.8221	-0.0878531	30.8528	0.012984	23.8414
		0.007504	5.86723	0.0331061	14.3574	0.0765837	28.4336	-0.0879143	30.9076	0.012992	23.8608
		0.007552	5.46422	0.0331143	14.2979	0.0765837	29.2132	-0.0879918	31.0575	0.013	23.8802
		0.00756	5.148	0.0331306	14.5866	0.076649	29.0778	-0.0879755	30.8798	0.013016	23.8932
		0.007544	4.9523	0.0331551	14.7525	0.0766122	27.8715	-0.0879878	30.9267	0.013008	23.9113
		0.007528	4.95619	0.0331265	14.5927	0.0764816	27.9706	-0.088049	31.1924	0.013	23.9321
		0.007528	5.02747	0.0331347	14.4433	0.0765673	29.3435	-0.088	31.02	0.013008	23.9437
		0.007504	5.12467	0.0331347	14.4843	0.076649	28.4959	-0.0879959	31.02	0.013072	23.9619
		0.00752	5.12726	0.0331469	14.4434	0.0765102	27.5531	-0.0880898	31.2512	0.013112	23.9774
		0.007528	5.04048	0.0331469	14.3694	0.0765265	28.9523	-0.0880531	31.0114	0.013128	24.0008
		0.007592	4.77139	0.0331837	14.3746	0.0766612	29.0296	-0.0880531	30.9307	0.013088	24.0176
		0.007728	4.43621	0.0332082	14.1506	0.0765837	27.625	-0.0880939	31.0813	0.013088	24.0396
		0.007792	4.19405	0.0332082	13.9953	0.0765184	28.4793	-0.088102	30.9631	0.013112	24.0591
		0.007816	4.07741	0.0332204	14.3514	0.0766776	29.0177	-0.088098	30.938	0.01312	24.0798
		0.007792	4.12536	0.0332408	14.8555	0.0766327	27.4889	-0.0881061	30.9307	0.013096	24.0928
		0.007744	4.26662	0.0332571	14.995	0.0765143	27.5874	-0.0881184	30.9836	0.013144	24.1122
		0.007688	4.4364	0.0332449	14.5061	0.0765673	28.9074	-0.0881469	31.0338	0.0132	24.1265
		0.007648	4.67698	0.0332408	13.9372	0.0766041	28.1946	-0.088102	30.8852	0.013272	24.1511
		0.007616	4.86182	0.0332367	14.0238	0.0764776	27.5068	-0.0880694	30.8126	0.013304	24.1602
		0.007592	4.87714	0.0332408	14.7466	0.0764816	28.8374	-0.088098	30.8681	0.013296	24.1757
		0.007592	4.78382	0.0332286	15.2494	0.0766163	28.7918	-0.0880653	30.7406	0.013304	24.1926
		0.007616	4.68955	0.0332408	15.3432	0.0765796	27.4764	-0.0880327	30.6144	0.013296	24.2068
		0.007664	4.55784	0.033249	14.9138	0.0765469	28.1304	-0.0880286	30.4809	0.013304	24.2185
		0.007664	4.46232	0.0332408	14.6185	0.0766735	29.2701	-0.0879796	30.1967	0.01336	24.2237
		0.007688	4.4688	0.0332367	14.8808	0.0767306	28.2752	-0.0879184	29.9708	0.013424	24.2418
		0.007696	4.54522	0.0332449	15.416	0.0766163	27.6918	-0.0878776	29.7858	0.013448	24.2703
		0.007672	4.64582	0.0332571	15.6802	0.076649	29.0436	-0.0878286	29.5492	0.01344	24.2976
		0.00764	4.7892	0.0332694	15.7139	0.0767429	28.9082	-0.0877796	29.3465	0.013456	24.3235
		0.007616	5.04821	0.0332857	15.5044	0.0766653	27.6404	-0.0877755	29.3306	0.013488	24.3455
		0.007528	5.49274	0.0332898	15.5771	0.0765796	28.153	-0.0877592	29.2652	0.013504	24.3624
		0.007488	6.01085	0.033298	15.9702	0.0767061	29.3244	-0.0876898	28.9314	0.013536	24.3831
		0.0074	6.4873	0.0332939	16.2246	0.0767551	28.2943	-0.0876286	28.7445	0.013544	24.3999
		0.007296	6.93787	0.0332857	16.288	0.076649	27.4863	-0.0875714	28.6189	0.013632	24.4077
		0.00712	7.4135	0.0332898	16.1473	0.0766694	28.7581	-0.0875061	28.3136	0.013616	24.4207
		0.007008	7.83312	0.0333061	16.2088	0.0767918	29.015	-0.0874571	28.2244	0.01356	24.4427
		0.00692	8.19941	0.0333306	16.3072	0.0767306	27.5854	-0.0874245	28.1247	0.013592	24.4531
		0.006896	8.5321	0.033351	16.3865	0.076649	28.0215	-0.0874041	28.0395	0.013648	24.4686
		0.006896	8.77051	0.0333633	16.4269	0.0767878	29.3031	-0.0873755	27.9418	0.01364	24.4842
		0.00688	8.7731	0.0333633	16.3542	0.0769061	28.3043	-0.0873837	28.1202	0.013616	24.4984
		0.006888	8.64221	0.0333837	16.2756	0.0768327	27.382	-0.0873796	28.1433	0.0136	24.5256
		0.006872	8.59426	0.0333959	16.3159	0.0769224	28.7806	-0.0874204	28.3038	0.0136	24.5451
		0.006864	8.65646	0.0334163	16.4559	0.0770735	29.0383	-0.0874735	28.4656	0.013608	24.5606
		0.006864	8.89234	0.0334694	16.4915	0.0770449	27.6879	-0.0875061	28.6558	0.013616	24.5697
		0.006888	9.21115	0.0335061	16.2629	0.0769714	28.1074	-0.0875551	28.8303	0.013672	24.5892
		0.00688	9.34205	0.0335224	15.9582	0.0771102	29.4003	-0.0876204	29.111	0.013736	24.6164
		0.006904	9.23318	0.033551	16.2589	0.0771796	28.7535	-0.0876612	29.2274	0.013808	24.6319
		0.006904	9.12432	0.0335755	16.4921	0.0771265	27.8457	-0.0877184	29.5313	0.013848	24.6449
		0.006912	9.10877	0.0335918	16.4155	0.0771714	29.2113	-0.0878245	29.9219	0.013824	24.6643
		0.006888	9.14765	0.0336122	16.2821	0.077351	29.6202	-0.087898	30.1413	0.01376	24.6838
		0.006864	9.38592	0.0336571	16.037	0.0773796	28.2421	-0.088	30.3726	0.013792	24.7045
		0.006872	9.73795	0.0337184	15.8111	0.0773755	28.515	-0.088102	30.6665	0.013864	24.7278
		0.006872	10.0044	0.0337551	15.9333	0.0775347	29.9261	-0.0882122	30.9282	0.013904	24.7486
		0.006888	9.97478	0.0337837	15.9286	0.077649	28.9311	-0.0882571	30.8812	0.013936	24.7615
		0.006904	9.64349	0.0338041	15.6498	0.0775714	28.0637	-0.0883143	31.0041	0.01396	24.7771
		0.00692	8.99218	0.0338163	15.3015	0.0776122	29.4095	-0.0883306	31.0404	0.014024	24.7913
		0.007056	8.11142	0.0338	15.2982	0.0777551	29.6295	-0.0883469	31.0464	0.014064	24.8055
		0.007216	7.24099	0.0337918	15.1265	0.0777878	28.3009	-0.0883633	31.1059	0.014072	24.8261
		0.007384	6.62328	0.0337878	14.89	0.0777592	28.8043	-0.0883755	31.1231	0.014096	24.8466
		0.007424	6.29587	0.0337878	14.7863	0.0779184	29.9645	-0.0883714	31.1079	0.014104	24.8568
		0.007448	6.12907	0.0337592	14.7896	0.0780204	28.6603	-0.0883755	31.2334	0.01412	24.8682
		0.007456	6.1213	0.0337592	14.6633	0.0779755	28.1086	-0.0884163	31.423	0.01416	24.8771
		0.007488	6.22752	0.0337551	14.6026	0.0780776	29.5436	-0.0884	31.3027	0.014192	24.9029
		0.007504	6.28843	0.033751	14.4756	0.0782367	28.8743	-0.0884286	31.4395	0.014216	24.9184
		0.007504	6.15494	0.0337429	14.3157	0.0782163	27.8959	-0.0884735	31.5697	0.014224	24.9353
		0.007584	5.81285	0.0337633	14.2298	0.0782776	29.3593	-0.088498	31.4879	0.0142	24.956
		0.007672	5.39942	0.0337673	14.2238	0.0783714	29.0574	-0.0884694	31.2196	0.014168	24.9716
		0.007688	5.06246	0.0337633	14.3573	0.0782735	27.9705	-0.0885306	31.4568	0.014192	24.9936
		0.007672	4.79333	0.0337755	14.3791	0.0782571	29.2781	-0.0885592	31.439	0.014208	25.013
		0.007656	4.58126	0.0337878	14.107	0.0783102	29.3177	-0.0885061	31.0795	0.014232	25.0286
		0.007712	4.44288	0.0338122	13.6934	0.0782653	27.921	-0.0885633	31.3194	0.014224	25.0532
		0.00768	4.39752	0.0338163	13.6095	0.0782694	28.9748	-0.0886286	31.5123	0.014232	25.0662
		0.007632	4.42214	0.0338204	13.8104	0.0784571	29.4915	-0.0885878	31.2255	0.014248	25.083
		0.00764	4.38067	0.0338408	13.8441	0.0784612	28.03	-0.0886367	31.4687	0.014312	25.1064
		0.007712	4.16294	0.0338408	13.7509	0.078449	28.3049	-0.0887184	31.6557	0.014392	25.1258
		0.007816	3.83246	0.0338408	13.5091	0.0785673	29.6117	-0.0886531	31.2923	0.014464	25.1413
		0.007952	3.54216	0.0338327	13.4741	0.0786367	28.6002	-0.0886531	31.3313	0.014472	25.1595
		0.007992	3.34776	0.0338735	13.8652	0.0785224	28.0208	-0.088698	31.4535	0.01448	25.1815
		0.008024	3.23112	0.0338898	14.4724	0.0786	29.434	-0.0886286	31.0543	0.014528	25.1984
		0.008016	3.15725	0.0338776	14.4936	0.0786531	29.0554	-0.0885755	30.8779	0.014584	25.2126
		0.007992	3.15595	0.033898	14.0033	0.0785184	27.921	-0.0886245	31.1018	0.014584	25.2269
		0.008	3.25704	0.0339551	13.8573	0.0784857	29.1327	-0.0885878	30.7933	0.014528	25.2398
		0.007968	3.38794	0.0340041	13.8699	0.0786	29.3527	-0.0885143	30.4985	0.014488	25.2606
		0.007944	3.45533	0.0340653	13.9254	0.0784898	28.0717	-0.0885388	30.5997	0.014496	25.2826
		0.007936	3.46181	0.0341347	14.0073	0.078502	29.1777	-0.0885388	30.5342	0.01456	25.2995
		0.007968	3.37368	0.0341714	14.1572	0.0786408	29.4644	-0.0884816	30.2825	0.0146	25.3176
		0.008	3.14472	0.0341918	14.2259	0.0785918	27.9904	-0.0884776	30.2376	0.01464	25.3357
		0.008048	2.84582	0.0341959	14.4128	0.0785224	28.6134	-0.0884776	30.1815	0.014664	25.3474
		0.008096	2.63098	0.0341878	14.9407	0.0786286	29.5204	-0.0884204	29.8247	0.014704	25.3681
		0.008104	2.6245	0.0342041	15.3702	0.0785918	28.18	-0.0883878	29.6887	0.014744	25.3837
		0.008064	2.89234	0.0342041	15.1628	0.0784286	27.9877	-0.0883592	29.472	0.014776	25.3941
		0.00796	3.38434	0.0342	14.7677	0.0784898	29.2826	-0.0882939	29.1753	0.014792	25.407
		0.007784	4.12891	0.0342082	14.8186	0.0785347	28.5539	-0.0882327	28.9916	0.014792	25.4316
		0.007536	4.95139	0.0342245	15.0869	0.0784286	27.5484	-0.0881592	28.7472	0.014792	25.4563
		0.007384	5.55106	0.0342449	15.0982	0.0784286	28.8539	-0.0880939	28.5793	0.014792	25.4718
		0.007232	5.82062	0.034249	15.1325	0.0785714	29.0104	-0.0880286	28.4128	0.014808	25.4848
		0.007136	5.86469	0.0342776	15.2515	0.0784612	27.6336	-0.0879551	28.1711	0.014816	25.5042
		0.007088	5.82192	0.0342939	15.2852	0.0783265	28.1886	-0.0878694	27.8757	0.014808	25.525
		0.007048	5.82322	0.0342939	15.157	0.0784	29.1968	-0.0878531	27.9701	0.01484	25.5522
		0.007008	5.95925	0.0343061	15.3393	0.0783633	27.8193	-0.0878041	27.723	0.014896	25.5716
		0.006944	6.2711	0.0343347	15.5798	0.078249	28.1649	-0.0877592	27.5016	0.01492	25.5936
		0.006896	6.68146	0.0343265	15.8077	0.0783796	29.3164	-0.0877184	27.3761	0.014952	25.6092
		0.00688	7.05192	0.0343429	15.9041	0.0784204	28.2818	-0.087702	27.4831	0.015	25.6196
		0.00688	7.4161	0.0343429	15.6953	0.0783388	28.2455	-0.0876857	27.4349	0.015016	25.6364
		0.006864	7.65845	0.0343633	15.6054	0.0784204	29.3309	-0.0876531	27.3503	0.015	25.6584
		0.006864	7.81781	0.0343837	15.9933	0.0784327	28.2897	-0.0876	27.3199	0.014976	25.6818
		0.006848	8.06486	0.034449	16.132	0.0782898	27.8741	-0.0876408	27.5632	0.015016	25.6947
		0.00684	8.45448	0.034498	15.9582	0.0783551	29.1168	-0.0876449	27.6233	0.015024	25.7025
		0.006848	8.65387	0.0345673	15.8287	0.0783796	28.038	-0.0876408	27.6168	0.01504	25.7232
		0.006856	8.75496	0.0346041	15.8605	0.0782735	27.3158	-0.087649	27.7014	0.015048	25.7427
		0.006872	8.86901	0.0346367	15.867	0.078298	28.657	-0.0876898	27.9643	0.01512	25.7647
		0.006864	8.904	0.0346327	15.803	0.0784245	28.6636	-0.0876857	27.9748	0.015184	25.779
		0.006856	8.81458	0.0346408	15.6286	0.0783429	27.4163	-0.087702	28.06	0.015208	25.7984
		0.006856	8.85734	0.034649	15.5077	0.0783469	28.4641	-0.0877143	28.1418	0.015184	25.8192
		0.006872	9.14117	0.0346449	15.3796	0.0784612	29.1466	-0.0878041	28.5798	0.015224	25.8425
		0.00692	9.47554	0.0346408	15.2237	0.0784531	27.8491	-0.0878857	28.8706	0.015296	25.8865
		0.007008	9.49627	0.034649	15.0783	0.0783429	27.8332	-0.0879755	29.2353	0.01536	25.9436
		0.007032	9.27854	0.0346204	14.9832	0.0784245	29.2344	-0.088102	29.7005	0.0154	26.0071
		0.007024	8.98046	0.0345918	14.931	0.0784776	28.4918	-0.0882245	30.0844	0.015416	26.0654
		0.006992	8.82624	0.0345755	14.6594	0.0783837	27.7928	-0.0883347	30.3573	0.015456	26.1289
		0.007008	8.8392	0.0345755	13.8599	0.0784571	29.2165	-0.0884612	30.679	0.015584	26.1898
		0.006984	9.0349	0.0345592	13.1563	0.0785918	29.3989	-0.0885918	30.9638	0.015656	26.2559
		0.006984	9.37944	0.0345714	13.3558	0.0785306	28.1951	-0.0886367	30.8461	0.01576	26.3168
		0.006952	9.70819	0.0345837	14.3151	0.0785061	29.206	-0.0887306	31.1666	0.015816	26.3764
		0.006976	9.7367	0.0346082	15.3346	0.078649	29.9281	-0.0887755	31.1964	0.015856	26.4369
		0.006992	9.55051	0.0345837	15.6108	0.0786122	28.5823	-0.0887592	31.0768	0.01592	26.4986
		0.006976	9.34982	0.0345551	14.9501	0.0786286	29.245	-0.0887918	31.2175	0.01596	26.5593
		0.006992	9.05693	0.0345265	13.8804	0.0788163	30.2188	-0.0888204	31.2922	0.016008	26.6215
		0.007064	8.54011	0.0345061	12.9582	0.0788735	28.8597	-0.0888367	31.2744	0.016056	26.6759
		0.007184	7.88352	0.034498	12.68	0.0788571	28.8967	-0.0888612	31.3007	0.016088	26.729
		0.00732	7.34611	0.034502	13.2951	0.079	30.1282	-0.0889061	31.4269	0.016136	26.777
		0.007424	6.94435	0.0345265	14.0799	0.0790571	29.1022	-0.0889224	31.4004	0.016184	26.8353
		0.007464	6.74218	0.0345061	14.1619	0.0789796	28.5466	-0.0889429	31.545	0.016184	26.9027
		0.00748	6.7033	0.0344694	13.5903	0.0790653	30.0477	-0.088951	31.51	0.016208	26.961
		0.007512	6.72922	0.0344449	12.5675	0.0791347	29.3328	-0.0889592	31.5061	0.016264	27.0245
		0.007552	6.59338	0.0344245	11.8916	0.0790571	28.4608	-0.0888776	31.1223	0.016408	27.0803
		0.007608	6.19339	0.0344204	12.2213	0.0791143	29.5456	-0.0887959	30.7491	0.016512	27.1386
		0.007672	5.69491	0.0344653	13.2487	0.0792367	29.064	-0.0887714	30.6586	0.016552	27.1826
		0.00772	5.32944	0.0345184	13.9319	0.0792082	28.4278	-0.0887184	30.3368	0.016552	27.2436
		0.007776	5.05858	0.0345102	13.9313	0.0792939	29.4168	-0.0886286	30.0097	0.01656	27.3109
		0.007896	4.81013	0.034502	13.143	0.0793673	28.922	-0.0886204	30.0633	0.0166	27.3706
		0.007936	4.62658	0.0344816	11.9412	0.079351	28.7085	-0.0886	29.976	0.01668	27.4146
		0.007944	4.57502	0.034449	11.3036	0.0794122	29.8957	-0.0884857	29.4712	0.016776	27.438
		0.007896	4.65754	0.0344286	11.9491	0.0794939	29.1293	-0.0884	29.1105	0.016768	27.4768
		0.007832	4.75814	0.034449	13.0115	0.0794286	28.3643	-0.088351	28.9479	0.016728	27.5235
		0.007824	4.80197	0.0344653	13.4066	0.079502	29.7279	-0.0882531	28.4795	0.016744	27.5909
		0.00788	4.77605	0.0344653	13.2732	0.0795551	29.28	-0.0881388	28.0361	0.016808	27.6466
		0.00796	4.63906	0.0344571	12.487	0.0794653	28.1191	-0.0880449	27.8816	0.016856	27.7062
		0.008016	4.37126	0.034449	11.5614	0.0794327	29.2198	-0.087951	27.6048	0.016912	27.7736
		0.008048	4.06963	0.0344286	11.4299	0.0795388	29.8177	-0.087849	27.2525	0.016968	27.828
		0.008016	3.96336	0.0344571	12.4077	0.079502	28.3596	-0.0877959	27.191	0.016992	27.8864
		0.007984	4.03334	0.0344939	13.3776	0.0794571	28.7606	-0.0877551	27.0279	0.017032	27.9317
		0.007968	4.23811	0.0344776	13.5771	0.0795633	29.827	-0.0876857	26.7392	0.017032	27.9719
		0.00788	4.55011	0.0344653	13.1389	0.0795673	28.4898	-0.0876612	26.7874	0.017008	27.9861
		0.00776	5.02267	0.0344735	12.1928	0.0794735	28.3642	-0.0875959	26.6283	0.017016	27.9913
		0.007648	5.54069	0.0344449	11.766	0.0795592	29.4848	-0.0875061	26.3535	0.017088	27.9978
		0.007552	5.90746	0.0344286	12.2008	0.0795429	28.2771	-0.0874653	26.4063	0.01716	28.0068
		0.007512	6.03835	0.034449	13.3418	0.0794694	28.291	-0.0874041	26.2371	0.017168	28.0159
		0.007496	6.02669	0.0344857	14.0363	0.0795224	28.7574	-0.0873265	25.9484	0.01716	28.0159
		0.007488	6.06422	0.0344776	14.109	0.0794735	27.6601	-0.0872857	25.9226	0.017192	28.0147
		0.007416	6.3709	0.0344571	13.336	0.0793673	27.5431	-0.0872653	25.8902	0.017216	28.0147
		0.00732	6.84346	0.0344612	12.7988	0.0794408	28.1688	-0.0872204	25.6754	0.0172	28.0082
		0.007176	7.34093	0.034502	12.9719	0.0793796	26.8765	-0.0872	25.6384	0.017184	28.0081
		0.007064	7.7257	0.0345143	13.8711	0.0793143	27.4269	-0.0871714	25.5683	0.017176	28.0068
		0.006984	7.9499	0.0345102	14.5622	0.0794	28.1365	-0.0871551	25.6681	0.017224	28.0056
		0.007008	7.96286	0.0345551	14.7089	0.0793633	26.9003	-0.0871429	25.6311	0.017272	28.0133
		0.006992	7.93958	0.034551	14.0502	0.0792776	27.3569	-0.0871388	25.7936	0.017296	28.0172
		0.006944	8.15424	0.0345429	13.5528	0.0793633	28.0142	-0.0871551	26.0176	0.017272	28.0184
		0.006968	8.57237	0.0345633	13.6195	0.0793184	26.8434	-0.0871673	26.0084	0.017288	28.0107
		0.006968	8.99342	0.0345878	14.3819	0.0792694	27.222	-0.0871551	25.8868	0.017304	28.0106
		0.006968	9.28373	0.0346122	15.3082	0.0793347	27.8266	-0.0871918	26.2608	0.017336	28.0107
		0.006976	9.32779	0.0346449	15.6689	0.0792816	26.5759	-0.0871918	26.3559	0.01736	28.0159
		0.006968	9.21634	0.0346408	15.0273	0.0791633	27.0132	-0.0872367	26.6189	0.017344	28.0172
		0.006936	9.13339	0.0346449	14.1189	0.0792286	28.0168	-0.0873102	27.1185	0.017328	28.0146
		0.006888	9.22282	0.0346653	13.9254	0.0791714	26.7727	-0.0873918	27.5361	0.017352	28.0108
		0.006896	9.53093	0.034702	14.4698	0.0790694	27.2213	-0.0874449	27.6676	0.017432	28.0082
		0.006904	10.0022	0.0347388	15.4569	0.0791469	28.1291	-0.0875796	28.1282	0.017488	28.0133
		0.006912	10.445	0.0347755	15.9293	0.0791102	27.0225	-0.0876612	28.3779	0.01752	28.0146
		0.006992	10.6641	0.0348041	15.7298	0.0790286	27.2604	-0.0877469	28.728	0.017504	28.0145
		0.007008	10.5098	0.0348204	14.8689	0.0791143	28.182	-0.0878694	29.0861	0.01748	28.0133
		0.007032	9.98794	0.0348327	14.2927	0.0790816	27.1751	-0.0879918	29.4343	0.01748	28.0146
		0.007136	9.44021	0.0348694	14.4176	0.0790449	27.5438	-0.0880857	29.6701	0.017512	28.0133
		0.007208	9.26942	0.0348939	15.3255	0.079102	27.7704	-0.0881878	29.8815	0.01756	28.0146
		0.007128	9.69662	0.0349102	16.0363	0.0790776	27.3489	-0.0882653	30.0341	0.01756	28.012
		0.007024	10.3727	0.0349184	16.1618	0.0790816	27.6991	-0.0883673	30.2713	0.017536	28.0146
		0.007024	10.9583	0.0349306	15.5195	0.0791102	27.6979	-0.0884245	30.3526	0.017544	28.0108
		0.007048	11.2473	0.034898	14.7128	0.0790939	27.76	-0.088502	30.5052	0.017552	28.0147
		0.007072	11.2719	0.0348898	14.4346	0.0791633	28.5191	-0.0885347	30.5442	0.017552	28.0095
		0.007104	11.0399	0.034898	14.9982	0.0791469	27.7249	-0.0885633	30.5587	0.01756	28.0082
		0.007168	10.5915	0.0349265	15.869	0.0791061	28.1366	-0.0886041	30.6393	0.017576	28.0133
		0.00724	9.98928	0.0349429	16.2636	0.0792122	29.2405	-0.0886082	30.6135	0.017568	28.0198
		0.007296	9.42211	0.0349673	15.9589	0.0791959	27.9879	-0.0886163	30.636	0.017584	28.0185
		0.007344	9.21763	0.0349878	15.0941	0.0791061	28.1616	-0.0886367	30.6756	0.0176	28.0236
		0.007376	9.29798	0.0350041	14.3158	0.0792286	29.1315	-0.0886408	30.7007	0.0176	28.0466
		0.007408	9.36538	0.0350408	14.2642	0.0791878	27.8299	-0.0886857	30.8534	0.017592	28.0606
		0.007384	9.37574	0.0350816	14.9117	0.0791265	27.9944	-0.0887184	30.8739	0.0176	28.0734
		0.0074	9.31224	0.0351347	15.2778	0.0792286	28.6312	-0.0886571	30.591	0.017648	28.0874
		0.007392	9.21893	0.0351551	15.1661	0.0792408	27.9091	-0.0886694	30.747	0.017664	28.1042
		0.007416	9.0971	0.0351755	14.6132	0.0792408	28.3907	-0.088698	30.6849	0.017656	28.1236
		0.007448	8.90659	0.0351633	13.8381	0.0793755	28.91	-0.0886122	30.3042	0.01768	28.1431
		0.00748	8.50891	0.0351796	13.4946	0.0793837	27.7631	-0.0885918	30.3664	0.017688	28.1612
		0.007488	7.9897	0.0351755	14.1011	0.0793673	28.6219	-0.0886041	30.3215	0.017664	28.1807
		0.00756	7.54306	0.0351959	14.8456	0.0794898	28.9701	-0.0885551	30.0487	0.017648	28.191
		0.007688	7.17893	0.0351878	14.9963	0.0794122	27.7003	-0.0885469	30.0646	0.017664	28.2053
		0.007776	6.91843	0.0352	14.5251	0.0793796	28.5988	-0.0885388	30.0547	0.017712	28.2195
		0.007832	6.68909	0.0351755	13.6702	0.0794653	29.2985	-0.0885265	29.9508	0.017792	28.239
		0.007784	6.44333	0.0352	13.0194	0.0794245	28.0241	-0.0885061	29.8776	0.017872	28.2519
		0.007776	6.13147	0.0352	13.1793	0.0793796	28.7264	-0.0884776	29.7943	0.017904	28.2753
		0.007768	5.9904	0.0352327	14.025	0.0795061	29.356	-0.0884286	29.5333	0.017888	28.2908
		0.007816	5.97096	0.0352408	14.5603	0.0794694	28.0723	-0.0883878	29.2512	0.017904	28.3077
		0.007872	5.87506	0.0352367	14.4401	0.0794571	28.6266	-0.0883347	28.9129	0.017944	28.3271
		0.00792	5.62104	0.0352041	13.6724	0.0794776	28.7456	-0.0882327	28.6335	0.017952	28.3478
		0.00792	5.38128	0.0352082	12.9641	0.0793714	27.5221	-0.0881551	28.4624	0.017968	28.3647
		0.007928	5.34629	0.0351959	12.855	0.0792816	28.0334	-0.0880612	28.169	0.017952	28.3764
		0.007944	5.43182	0.0352	13.418	0.0792857	27.8445	-0.0879633	27.9127	0.01796	28.3919
		0.007912	5.49144	0.0352122	13.8956	0.0791469	26.8931	-0.0878939	27.914	0.017984	28.4139
		0.007912	5.49533	0.0352327	14.0278	0.0792	27.8418	-0.0878857	27.8565	0.018008	28.4295
		0.00796	5.44867	0.0352163	13.4457	0.0792612	27.518	-0.087849	27.6939	0.01804	28.4489
		0.00796	5.30093	0.0352082	12.5842	0.0792286	27.0681	-0.0878327	27.6794	0.018064	28.4684
		0.007992	5.0508	0.0352163	12.2498	0.079302	27.8371	-0.0878286	27.6582	0.018128	28.4891
		0.008016	4.77005	0.0352122	12.7988	0.079351	27.1216	-0.0877959	27.5797	0.018168	28.5072
		0.008048	4.70664	0.0352245	13.5573	0.0792816	26.6955	-0.0877796	27.5003	0.018152	28.5254
		0.008056	4.84118	0.0352122	13.8288	0.0793959	27.8054	-0.0877347	27.24	0.01812	28.5435
		0.008024	5.15837	0.0351959	13.4	0.0794286	26.8071	-0.0877347	27.3787	0.018136	28.5643
		0.007944	5.59253	0.0351796	12.658	0.0793551	26.5289	-0.0877306	27.4455	0.018184	28.5798
		0.00784	6.14678	0.0351959	12.3449	0.0794694	27.7274	-0.0877265	27.3199	0.0182	28.5993
		0.00772	6.65952	0.0352	12.7341	0.0794694	26.7707	-0.0877837	27.7389	0.018184	28.6135
		0.007616	7.06099	0.0352082	13.3683	0.0793388	26.558	-0.0879102	28.2694	0.018192	28.633
		0.00752	7.20744	0.0352408	13.7793	0.0793755	27.4142	-0.0879714	28.4657	0.018208	28.6537
		0.007488	7.1543	0.0352327	13.6095	0.0793592	26.7463	-0.088102	29.0054	0.018216	28.6641
		0.00748	7.07395	0.0352041	12.888	0.0792694	26.6479	-0.0882245	29.4435	0.018224	28.6783
		0.007488	7.09728	0.0352041	12.5504	0.0793551	27.2497	-0.0883265	29.7508	0.018232	28.6991
		0.007488	7.17245	0.0352245	12.9561	0.0793551	26.2917	-0.0884	30.0184	0.018256	28.7198
		0.007488	7.40702	0.0352449	13.8851	0.0793061	26.7595	-0.0885265	30.3013	0.018272	28.7315
		0.007456	7.8084	0.0352776	14.66	0.0793673	27.1797	-0.0886204	30.5992	0.01828	28.7574
		0.007408	8.35742	0.0353061	14.7082	0.0792857	26.1193	-0.0887306	30.8999	0.018312	28.7755
		0.00732	8.81328	0.0353184	13.9933	0.0792531	26.8943	-0.0888163	31.0068	0.018384	28.7911
		0.007256	9.11525	0.0353061	13.5823	0.0793224	26.9961	-0.0888898	31.1336	0.018456	28.7988
		0.007288	9.16838	0.0353061	13.7435	0.0792898	26.2502	-0.0889388	31.3285	0.01848	28.8105
		0.00732	9.06989	0.0353143	14.4788	0.0793347	27.0793	-0.0889592	31.3068	0.01848	28.8235
		0.007328	9.03749	0.0353265	15.4217	0.0794204	26.8765	-0.0889673	31.3187	0.018488	28.8429
		0.007312	9.25771	0.0353224	15.6979	0.0794122	26.7014	-0.0889959	31.4607	0.018504	28.8649
		0.007272	9.64344	0.035302	15.0776	0.0794612	27.3145	-0.0889878	31.3015	0.018568	28.887
		0.007224	9.9877	0.0352816	14.4829	0.0794612	26.7682	-0.0889551	31.0986	0.018608	28.9051
		0.00724	9.99922	0.0352653	14.407	0.0794286	27.074	-0.0889796	31.244	0.018624	28.9207
		0.007296	9.84019	0.0352449	14.8041	0.0795061	27.6951	-0.0889714	31.1568	0.018616	28.9375
		0.00732	9.71755	0.0352408	15.4046	0.0794857	27.2114	-0.0889592	31.1251	0.018608	28.9505
		0.007264	9.68789	0.0352408	15.6953	0.0795184	27.9653	-0.0889918	31.3669	0.018608	28.9686
		0.007264	9.82738	0.0352286	15.3464	0.0796122	28.2144	-0.0890367	31.511	0.018608	28.992
		0.007232	10.2183	0.0352367	14.7452	0.0795673	27.2597	-0.0890286	31.4667	0.018616	29.0153
		0.007264	10.6381	0.035249	14.8403	0.0795837	28.2646	-0.0890367	31.4323	0.018624	29.0282
		0.007336	10.7509	0.0352571	15.4342	0.0796531	27.8035	-0.0889959	31.1238	0.018632	29.0425
		0.007424	10.3649	0.0352816	16.0011	0.0795755	27.3337	-0.0890082	31.1997	0.018664	29.058
		0.007432	9.61762	0.0352857	16.208	0.0796204	28.3849	-0.0890082	31.164	0.018704	29.0775
		0.007496	8.90659	0.035298	15.9788	0.079698	28.1405	-0.0890163	31.1415	0.018752	29.1008
		0.007552	8.41954	0.035298	15.4766	0.0796612	27.5062	-0.0890735	31.4481	0.0188	29.1203
		0.007536	8.22384	0.0352939	15.6577	0.079702	28.7833	-0.0891102	31.5095	0.018816	29.1423
		0.007488	8.31326	0.035302	16.1644	0.0797551	28.3393	-0.0890776	31.2195	0.018864	29.1578
		0.007488	8.72774	0.0353265	16.5212	0.0796816	27.7672	-0.0890776	31.2241	0.018872	29.1747
		0.007496	9.27442	0.0353429	16.5331	0.079751	28.9973	-0.0890612	31.0167	0.018864	29.1825
		0.00748	9.69533	0.0353673	16.0878	0.0798163	28.3776	-0.0890041	30.6876	0.018872	29.2071
		0.007464	9.59294	0.0353755	15.7119	0.0797796	27.4302	-0.0889918	30.6764	0.01888	29.2265
		0.007504	8.90549	0.0353878	16.0211	0.079849	28.6206	-0.0889837	30.5733	0.018888	29.2408
		0.007608	7.88866	0.0353918	16.4612	0.0799673	28.4324	-0.0889469	30.3752	0.018888	29.2563
		0.007712	6.95491	0.0354	16.6005	0.0798735	27.4797	-0.088951	30.4095	0.018912	29.2745
		0.0078	6.41366	0.0354204	16.4433	0.079898	28.8168	-0.0889184	30.2456	0.018984	29.2913
		0.007848	6.16013	0.0354571	15.7688	0.0799837	28.729	-0.0888939	30.0071	0.019024	29.3069
		0.007896	6.0876	0.0355388	15.3591	0.0798653	27.7176	-0.0888531	29.8472	0.01904	29.3315
		0.007848	6.10056	0.0356204	15.817	0.0798408	28.6537	-0.0887633	29.423	0.019008	29.3509
		0.007832	6.03446	0.035698	16.5021	0.0798898	28.3842	-0.0886898	29.2084	0.019008	29.3652
		0.00788	5.75582	0.0357714	16.6401	0.0798041	27.9105	-0.0886163	28.9943	0.019008	29.3782
		0.007928	5.37869	0.0358327	16.2899	0.0798	28.6134	-0.0884898	28.6032	0.018968	29.4054
		0.007984	5.06765	0.0358612	15.7514	0.0798245	28.0895	-0.0883714	28.2563	0.018984	29.4313
		0.008024	4.84354	0.0358939	15.5446	0.0797878	28.0988	-0.0882898	28.072	0.019024	29.4456
		0.008048	4.7567	0.0359265	15.8353	0.0798327	28.7944	-0.0881592	27.6181	0.019064	29.4546
		0.008032	4.79947	0.035951	16.2165	0.0797878	27.8715	-0.088049	27.3491	0.019064	29.4792
		0.00804	4.83058	0.0359592	16.3183	0.079751	28.2831	-0.0879837	27.2962	0.019096	29.4961
		0.00804	4.64443	0.0359592	15.8511	0.0797878	28.3855	-0.0879265	27.1667	0.019144	29.5142
		0.008064	4.31702	0.0359755	15.0755	0.0797061	27.4156	-0.0878653	26.9433	0.019192	29.5246
		0.008104	3.9193	0.0359755	14.8476	0.0796857	28.1847	-0.0878163	26.769	0.019224	29.5453
		0.008112	3.64325	0.0359796	15.2909	0.0798	28.5309	-0.0877918	26.7551	0.019232	29.5648
		0.00812	3.55771	0.0359755	15.6603	0.0797347	27.2161	-0.0877592	26.5589	0.01924	29.5855
		0.008128	3.67435	0.0359796	15.4906	0.0797306	28.3116	-0.0877265	26.516	0.01924	29.592
		0.008088	3.80136	0.0359673	14.96	0.0798286	28.1656	-0.087698	26.4711	0.019232	29.6153
		0.00808	3.86616	0.0359837	14.5385	0.0797551	26.9262	-0.0876408	26.3693	0.019248	29.6243
		0.008088	3.91152	0.0359959	14.5226	0.0797184	27.7236	-0.0876122	26.3753	0.01928	29.6501
		0.008072	3.90634	0.0360082	14.6996	0.0798	28.0215	-0.0876327	26.6442	0.019344	29.6654
		0.008072	3.8195	0.0360163	14.7915	0.0797388	26.8964	-0.0876408	26.6158	0.019368	29.6858
		0.008088	3.60178	0.0360286	14.582	0.0797388	27.8682	-0.0876531	26.6554	0.019368	29.6973
		0.008104	3.36202	0.0360163	14.0204	0.0797918	27.6712	-0.0877265	27.0724	0.019368	29.7179
		0.008104	3.21816	0.0360163	13.782	0.079702	26.6584	-0.0877265	26.964	0.019368	29.7399
		0.008088	3.25704	0.0360286	14.1711	0.0796898	27.5662	-0.0876735	26.7071	0.01936	29.7632
		0.008064	3.51494	0.0360327	14.4994	0.0797143	27.3118	-0.0876571	26.8425	0.01936	29.7813
		0.008032	3.89856	0.0360408	14.4604	0.0796204	26.9313	-0.0876857	27.0962	0.019376	29.7917
		0.007976	4.37126	0.0360449	14.1254	0.0796612	27.7988	-0.0876857	27.0446	0.019392	29.802
		0.00792	4.80624	0.0360449	13.793	0.0796857	27.4434	-0.0877102	27.2666	0.019392	29.8267
		0.0078	5.23483	0.0360408	13.8102	0.079698	27.5451	-0.0878204	27.8388	0.019416	29.8552
		0.007672	5.65085	0.0360408	14.2132	0.0797918	28.254	-0.0879224	28.1671	0.019416	29.8668
		0.007552	6.00984	0.0360408	14.4393	0.0798204	27.5239	-0.0879796	28.3924	0.0194	29.8785
		0.007472	6.16536	0.0360367	14.2674	0.0798367	28.0987	-0.0880531	28.5661	0.0194	29.885
		0.007464	6.18091	0.036049	13.6761	0.0799306	28.7917	-0.0881633	28.9988	0.019456	29.9109
		0.007448	6.29846	0.0360612	13.3762	0.0798898	27.5742	-0.0882408	29.2102	0.019464	29.9329
		0.0074	6.63494	0.0360653	13.871	0.0798857	28.3393	-0.0883306	29.4975	0.019448	29.9563
		0.007248	7.10117	0.0360735	14.7629	0.0800163	28.7905	-0.0884612	29.8663	0.019496	29.9653
		0.00716	7.46016	0.0360857	15.2367	0.0799633	27.7573	-0.0885347	30.0916	0.019504	29.9887
		0.007128	7.56773	0.0360816	15.0862	0.0799796	28.4926	-0.0885918	30.2271	0.019504	30.0042
		0.007144	7.52237	0.0360653	14.4089	0.0800939	28.6842	-0.0886735	30.3501	0.019536	30.0146
		0.007152	7.4809	0.0360735	14.0614	0.0800694	28.223	-0.0886898	30.2806	0.01964	30.034
		0.007208	7.5107	0.036102	14.4017	0.0801551	28.735	-0.0886939	30.2601	0.01972	30.0535
		0.007208	7.74509	0.0361102	15.1985	0.0802735	28.5652	-0.0887837	30.5231	0.019752	30.0716
		0.007176	8.16062	0.0361224	15.6411	0.0803878	28.6411	-0.0888163	30.4769	0.019768	30.0924
		0.00716	8.56061	0.0361347	15.6199	0.0805061	29.1294	-0.0888327	30.508	0.01976	30.1092
		0.00716	8.742	0.0361306	15.1152	0.0805592	28.3425	-0.0888776	30.5959	0.01976	30.1248
		0.007208	8.67331	0.0361184	14.9803	0.0805714	28.8711	-0.0889143	30.7102	0.01976	30.139
		0.00724	8.49576	0.0361429	15.3595	0.0807102	28.8664	-0.0889224	30.5965	0.019808	30.161
		0.007248	8.37653	0.0361633	16.0519	0.0807061	28.363	-0.0889469	30.6711	0.019832	30.1766
		0.007232	8.36616	0.0361755	16.4286	0.0807878	28.9371	-0.088951	30.6493	0.019848	30.1947
		0.007224	8.41152	0.0361837	16.3091	0.0808776	28.8003	-0.0889347	30.4696	0.01984	30.209
		0.00724	8.50483	0.0361796	15.7865	0.0809184	28.8479	-0.0889184	30.3104	0.019888	30.2258
		0.007216	8.76792	0.0361878	15.7482	0.0809469	29.2437	-0.0889265	30.3448	0.019888	30.2544
		0.007248	9.01934	0.0362122	16.1836	0.0809755	28.5922	-0.0888735	29.9808	0.019896	30.2686
		0.007296	9.04915	0.0362449	16.6308	0.0810041	29.1538	-0.0888286	29.766	0.019928	30.2842
		0.007312	8.88586	0.0362571	16.7709	0.0810939	29.1479	-0.0887878	29.7013	0.01996	30.3049
		0.007304	8.75885	0.0362653	16.6678	0.0810816	28.7264	-0.088702	29.3002	0.019976	30.3192
		0.00732	8.64998	0.0362776	16.7089	0.0811592	29.465	-0.0885878	28.9183	0.019976	30.3308
		0.007336	8.3483	0.0362571	16.7935	0.0812	28.9926	-0.0885143	28.6554	0.01996	30.3516
		0.00744	7.80706	0.0362571	16.882	0.0811837	28.8631	-0.0884245	28.2794	0.01996	30.371
		0.007504	7.14912	0.0362776	16.9652	0.0812449	29.6056	-0.0883306	27.8777	0.01996	30.3878
		0.00756	6.63494	0.0363061	16.7974	0.0812367	28.528	-0.088302	27.762	0.01996	30.4047
		0.007624	6.23885	0.0363102	16.4471	0.0811959	28.8584	-0.0882122	27.47	0.019968	30.4176
		0.007696	5.93856	0.0363469	16.5785	0.0812653	29.1161	-0.0881061	27.1753	0.019976	30.4397
		0.007704	5.80378	0.0363755	16.854	0.0812204	28.1265	-0.0880245	27.0774	0.02	30.4591
		0.007712	5.8297	0.0364204	16.9149	0.0812408	28.7178	-0.0879469	26.8799	0.020024	30.4799
		0.007712	5.91782	0.0364449	16.8033	0.0813184	28.7634	-0.0878245	26.5139	0.02004	30.4902
		0.007728	5.9269	0.0364735	16.2754	0.0812612	28.1965	-0.0877959	26.4795	0.020024	30.5019
		0.00772	5.80766	0.0364857	16.0786	0.0812694	28.805	-0.0877673	26.3593	0.02004	30.5226
		0.007752	5.42794	0.0365061	16.4538	0.0812612	28.2976	-0.0877102	26.0461	0.02004	30.5395
		0.007888	4.82707	0.0365102	16.9448	0.0812082	28.1588	-0.087698	26.054	0.020056	30.5615
		0.008032	4.23139	0.0365143	17.0254	0.0811796	28.3438	-0.0876449	25.8545	0.020056	30.5771
		0.008064	3.83506	0.0365265	16.6699	0.0811224	27.7598	-0.087551	25.507	0.020096	30.5887
		0.008064	3.69379	0.0365429	16.1089	0.0811184	28.2123	-0.0875265	25.6041	0.020136	30.5991
		0.008088	3.76378	0.0365633	16.0647	0.0811388	28.0273	-0.0875184	25.6147	0.020176	30.6159
		0.00808	3.87005	0.0365796	16.4888	0.0810694	27.7869	-0.0874367	25.3512	0.0202	30.6341
		0.008112	3.89078	0.0365959	16.7346	0.0810612	27.8457	-0.0874163	25.3637	0.02024	30.6561
		0.008104	3.80006	0.0365959	16.5542	0.0810449	27.7116	-0.0874408	25.6478	0.020288	30.6743
		0.008144	3.57067	0.0365918	15.8776	0.0810041	27.7804	-0.0874327	25.5282	0.020304	30.6963
		0.008176	3.28949	0.0365796	15.3061	0.0809633	27.8174	-0.0873837	25.4364	0.020272	30.7092
		0.008216	3.0528	0.0365755	15.2633	0.0808898	27.2651	-0.0874041	25.5718	0.02028	30.7183
		0.008288	2.86406	0.0365918	15.4562	0.080898	28.1114	-0.087449	25.7813	0.02032	30.7326
		0.008336	2.70744	0.0365918	15.4423	0.0808857	27.4653	-0.0874286	25.5771	0.020328	30.7533
		0.008376	2.56618	0.0365959	15.1636	0.0808327	27.5803	-0.087449	25.7291	0.020328	30.7831
		0.008432	2.50526	0.0366041	14.8312	0.0809061	28.1742	-0.0875347	26.1234	0.02032	30.8013
		0.008408	2.54285	0.0366041	14.736	0.080898	27.5334	-0.0875959	26.3969	0.020328	30.8155
		0.008384	2.65949	0.0366122	14.8318	0.0808694	27.8736	-0.0876531	26.7438	0.02032	30.8298
		0.00836	2.77483	0.0366122	14.8061	0.0809347	28.1934	-0.0877347	27.172	0.02032	30.8492
		0.008336	2.9856	0.0366122	14.6924	0.0808653	27.3979	-0.0878245	27.5783	0.020352	30.87
		0.00824	3.34282	0.0366245	14.5675	0.0809061	28.1233	-0.0879061	27.9212	0.020384	30.8868
		0.00812	3.78322	0.0366367	14.4723	0.0809184	27.9304	-0.0879959	28.2754	0.020416	30.9024
		0.007976	4.19016	0.0366327	14.4723	0.0808898	27.785	-0.088098	28.58	0.020424	30.9179
		0.007864	4.55784	0.0366408	14.4445	0.080902	28.1537	-0.0882041	28.8588	0.020416	30.936
		0.00772	4.91246	0.0366571	14.2952	0.0808531	27.7612	-0.0883184	29.215	0.020392	30.9529
		0.007584	5.27501	0.0366776	14.0044	0.0808286	28.1365	-0.0884082	29.433	0.020392	30.9775
		0.007496	5.48496	0.0367184	13.943	0.080898	28.5349	-0.0884939	29.6597	0.020408	30.9957
		0.007464	5.54976	0.036751	14.0441	0.0808327	27.8775	-0.0885551	29.8267	0.020392	31.0151
		0.007456	5.53939	0.0367878	14.1631	0.0808531	28.7615	-0.0886653	30.2014	0.0204	31.0371
		0.007456	5.62234	0.0368122	14.0971	0.0809388	28.5996	-0.088702	30.132	0.020424	31.0462
		0.007448	5.88144	0.0368245	13.6485	0.0808531	27.8491	-0.0887673	30.2799	0.020448	31.0631
		0.0074	6.32419	0.0368327	13.4015	0.0808939	29.0124	-0.0888408	30.5415	0.020464	31.0747
		0.007352	6.86674	0.0368531	13.6611	0.081	29.0765	-0.0889143	30.6585	0.020488	31.0903
		0.007272	7.37722	0.0368857	13.9175	0.080898	28.1317	-0.0889388	30.7311	0.020544	31.0993
		0.0072	7.7736	0.0369184	13.9121	0.0809224	29.4319	-0.0889878	30.9373	0.020544	31.1304
		0.007136	8.05046	0.0369469	13.6922	0.0809918	29.1603	-0.0890204	31.1117	0.020536	31.1603
		0.007096	8.2068	0.036951	13.5481	0.0809061	28.2903	-0.0890163	31.0939	0.020536	31.1719
		0.007088	8.1901	0.0369633	13.6353	0.0809143	29.2026	-0.0890367	31.2069	0.02052	31.1862
		0.007048	8.12918	0.0369551	13.9643	0.0810367	29.4306	-0.0890327	31.2624	0.020488	31.2043
		0.007064	8.29757	0.0369469	14.1493	0.0809592	28.4046	-0.0890286	31.191	0.020496	31.2262
		0.007064	8.65906	0.0369551	14.1036	0.0809755	29.5396	-0.0890163	30.9988	0.020504	31.2454
		0.00708	9.01416	0.0369673	13.7322	0.0810571	29.3183	-0.0890327	31.0767	0.020552	31.2594
		0.007136	9.07248	0.0369755	13.6418	0.0810082	28.1694	-0.0890163	30.8891	0.020592	31.2798
		0.007168	8.85994	0.0369837	14.0891	0.0810327	29.087	-0.0890122	30.6605	0.02068	31.2965
		0.00724	8.59555	0.0369837	14.4901	0.0811551	28.8637	-0.089049	30.8771	0.020784	31.312
		0.007232	8.52946	0.0369918	14.5807	0.0811102	28.2949	-0.0890531	30.8441	0.0208	31.3288
		0.0072	8.63573	0.0369918	14.5536	0.0811306	29.2219	-0.0890367	30.675	0.020752	31.3444
		0.007216	8.89493	0.0370163	14.6633	0.081151	28.8024	-0.0890449	30.8712	0.020712	31.3664
		0.0072	9.31205	0.0370367	14.8701	0.0810857	28.3875	-0.0890286	30.7516	0.020776	31.3859
		0.007176	9.70685	0.0370612	15.1793	0.0811306	29.1743	-0.0889918	30.5739	0.020816	31.4027
		0.007208	9.76517	0.0370735	15.3405	0.0811184	28.2573	-0.0889878	30.5507	0.020808	31.4234
		0.007224	9.57509	0.0370735	14.8827	0.0811224	28.4059	-0.088951	30.2904	0.020824	31.4403
		0.007288	9.36797	0.037049	14.2821	0.0812082	28.7224	-0.0889347	30.1847	0.020856	31.4584
		0.00732	9.23059	0.0370653	14.4077	0.0812245	28.2302	-0.0889102	30.1108	0.020856	31.4805
		0.007352	9.13598	0.0370735	15.1074	0.0812612	28.4978	-0.0888163	29.721	0.020856	31.5051
		0.00736	9.0971	0.0370735	15.4715	0.0813061	28.3082	-0.0887429	29.6002	0.020896	31.5155
		0.007376	9.08803	0.0370857	15.5091	0.0812735	28.0948	-0.0886653	29.3702	0.020896	31.5349
		0.007392	9.06082	0.037098	15.4067	0.0812939	28.4073	-0.0885469	28.8562	0.020888	31.5556
		0.007392	8.97787	0.0370939	15.4245	0.0812408	27.8054	-0.0884653	28.5932	0.020912	31.5738
		0.007408	8.77699	0.0370939	15.6147	0.0812204	27.9713	-0.0884286	28.4472	0.020928	31.5919
		0.007408	8.46336	0.0370816	15.8995	0.0812571	27.9263	-0.0883878	28.2918	0.020936	31.6101
		0.007416	8.27414	0.0370857	15.9384	0.0812327	27.5187	-0.0883388	28.0765	0.020952	31.6256
		0.007416	8.32987	0.0370612	15.6774	0.0812408	27.6356	-0.0882735	27.9457	0.02096	31.6451
		0.007416	8.56963	0.0370735	15.4561	0.0812408	27.2656	-0.0882612	27.99	0.020976	31.6606
		0.007432	8.89622	0.0370694	15.5116	0.0811673	27.3601	-0.0882041	27.8089	0.020976	31.6813
		0.007424	9.0349	0.0370816	15.7626	0.0811837	27.5834	-0.0881388	27.661	0.021	31.7021
		0.007432	8.8392	0.0371061	15.8182	0.081102	26.5501	-0.0881102	27.7079	0.02104	31.7176
		0.007464	8.37811	0.0371429	15.5896	0.0810327	27.2015	-0.0881429	27.9305	0.021072	31.7384
		0.007528	7.76947	0.0371429	15.0816	0.0810776	27.4169	-0.0881265	27.912	0.021064	31.7552
		0.007616	7.1219	0.037151	14.9607	0.0809796	26.0513	-0.0881347	28.0983	0.021072	31.7772
		0.007736	6.6155	0.0371469	15.2706	0.0809796	27.0198	-0.0881796	28.2521	0.021096	31.7993
		0.007864	6.23755	0.0371306	15.4423	0.0810367	27.0244	-0.0882367	28.5415	0.021112	31.8187
		0.007968	5.93856	0.0371102	15.3248	0.0809551	25.9132	-0.0882286	28.4458	0.021152	31.8369
		0.008024	5.67158	0.0371143	14.8431	0.0809388	26.745	-0.0882286	28.4683	0.021224	31.8576
		0.00804	5.46293	0.0371102	14.4295	0.0809551	26.6743	-0.0882857	28.6997	0.021232	31.8719
		0.00804	5.33851	0.0371061	14.4486	0.0808612	26.161	-0.0883061	28.7532	0.021216	31.8952
		0.00804	5.31778	0.037102	14.6587	0.0808816	26.7509	-0.0883633	28.9964	0.021192	31.9133
		0.008032	5.3113	0.0370898	14.5265	0.0808694	26.486	-0.0884694	29.4125	0.02124	31.9315
		0.008056	5.16874	0.0370653	14.3825	0.0808531	26.5382	-0.0885796	29.7065	0.021312	31.9405
		0.008096	4.88645	0.0370571	14.2352	0.0809102	26.9564	-0.0887061	30.0738	0.021336	31.9574
		0.008136	4.65106	0.0370449	14.1335	0.080849	26.0843	-0.0888327	30.4518	0.021336	31.9729
		0.008104	4.66536	0.0370571	14.0853	0.0807837	26.6894	-0.088951	30.7127	0.021344	31.9924
		0.00808	4.88002	0.0370571	13.9334	0.0808571	27.0832	-0.0890122	30.8615	0.021328	32.0118
		0.008096	5.21539	0.0370612	13.6348	0.0807673	26.0261	-0.0891224	31.2182	0.02132	32.0287
		0.008032	5.47459	0.037049	13.3995	0.0807592	27.0693	-0.089151	31.1542	0.021368	32.0403
		0.008016	5.52125	0.0370367	13.342	0.080849	27.3058	-0.0891429	31.02	0.0214	32.0598
		0.008008	5.46163	0.0370286	13.3896	0.0808449	26.9438	-0.0891388	30.9639	0.02144	32.0779
		0.008032	5.43571	0.0370245	13.3301	0.0809184	27.5325	-0.0892245	31.201	0.021504	32.1064
		0.008056	5.48366	0.0370122	13.0888	0.0809429	27.3138	-0.0892082	31.0161	0.021488	32.1233
		0.008056	5.55106	0.0370082	12.9745	0.0809224	27.393	-0.0892408	31.2586	0.021496	32.1349
		0.008024	5.66899	0.0370163	13.0281	0.0809592	27.7829	-0.0893224	31.5797	0.021488	32.1544
		0.007936	5.98757	0.0370082	13.2732	0.0809061	27.3567	-0.089302	31.3782	0.021472	32.1673
		0.007856	6.47568	0.0370122	13.4516	0.0808776	27.9262	-0.0892694	31.3042	0.021488	32.1933
		0.007736	6.95731	0.0369959	13.2435	0.0809388	28.1475	-0.0893429	31.5652	0.02148	32.2166
		0.007616	7.41091	0.0369796	12.4137	0.0808653	27.6138	-0.0893347	31.2923	0.02152	32.2296
		0.00752	7.78157	0.0369837	12.1071	0.0808857	28.503	-0.0892939	31.0042	0.021536	32.2464
		0.007464	7.93838	0.0369592	12.4796	0.0809265	27.9547	-0.0893469	31.1871	0.02152	32.2581
		0.00744	7.9332	0.0369592	13.0796	0.0808612	27.7922	-0.0893959	31.2545	0.021528	32.2827
		0.007424	8.04562	0.0369592	13.246	0.0809184	28.5514	-0.0893551	31.0259	0.02156	32.3034
		0.007424	8.41838	0.0369551	12.8556	0.0809347	27.7341	-0.0893959	31.1732	0.021616	32.3216
		0.0074	8.93251	0.036951	12.0806	0.0809143	27.8848	-0.0894367	31.3087	0.02168	32.3384
		0.0074	9.33946	0.0369551	11.9247	0.0809878	28.5739	-0.089449	31.3186	0.021688	32.3604
		0.007392	9.62678	0.0369714	12.2993	0.0809633	27.7553	-0.0893796	31.0365	0.02172	32.3773
		0.007416	9.74203	0.0369878	12.7407	0.0809469	28.3354	-0.0893633	30.9862	0.021712	32.3916
		0.007424	9.74477	0.0369918	12.8404	0.0810367	29.0014	-0.0893469	30.8329	0.021688	32.4084
		0.00744	9.86774	0.0369796	12.5688	0.0809592	27.8497	-0.0893061	30.595	0.021696	32.4214
		0.007424	10.1576	0.0369837	12.3726	0.0809306	28.6716	-0.0892449	30.3386	0.021696	32.4434
		0.007392	10.4969	0.0369878	12.475	0.0809918	28.7998	-0.0891959	30.0942	0.021704	32.4693
		0.007384	10.5332	0.037	12.6593	0.0808816	27.6905	-0.0890898	29.6337	0.02176	32.4875
		0.0074	10.3699	0.0370204	12.6924	0.0808531	28.5019	-0.0889755	29.3001	0.021792	32.4939
		0.00744	10.1301	0.0370286	12.5978	0.0809714	28.7649	-0.0888898	29.0345	0.021872	32.5056
		0.00744	10.064	0.0370163	12.5945	0.0809388	28.0157	-0.0887714	28.6103	0.021864	32.5328
		0.007448	10.2662	0.0370082	12.8001	0.0809796	28.8144	-0.0886612	28.2879	0.021848	32.5523
		0.007472	10.725	0.0370041	13.1159	0.0810653	28.492	-0.0885796	28.1187	0.021928	32.5678
		0.00748	11.1306	0.0369878	13.3571	0.0810163	28.0757	-0.0884735	27.8618	0.02196	32.5834
		0.00748	11.1617	0.0370041	13.3988	0.0810327	28.5653	-0.0883755	27.5559	0.021992	32.5976
		0.007472	10.9453	0.037	13.1325	0.0810163	27.8213	-0.0882694	27.1925	0.02204	32.6158
		0.00748	10.6537	0.0370245	13.2336	0.0809673	27.8392	-0.0882	27.1113	0.022056	32.6365
		0.00748	10.4204	0.0370653	13.8249	0.081	28.0836	-0.0881347	26.9567	0.022064	32.6533
		0.007504	10.3012	0.0371143	14.2226	0.0809673	27.4487	-0.088049	26.7128	0.022064	32.6715
		0.007528	10.3154	0.0371143	14.3137	0.0809714	27.6971	-0.0879551	26.5206	0.022096	32.6935
		0.007512	10.4567	0.0371265	14.2761	0.0809633	27.4929	-0.0879306	26.6216	0.022112	32.7091
		0.007472	10.7405	0.0371184	14.3514	0.0809347	27.1844	-0.0878776	26.3487	0.022136	32.735
		0.00744	11.1343	0.0371265	14.5754	0.0809592	27.2927	-0.0878041	26.0739	0.022168	32.7544
		0.007464	11.2729	0.0371184	14.8244	0.080951	26.8025	-0.0877878	26.0409	0.022176	32.7765
		0.007512	10.9464	0.037151	14.9864	0.0809592	27.0859	-0.0877673	25.9967	0.022176	32.7946
		0.007584	10.2652	0.0372	14.9375	0.0810082	27.0099	-0.0877429	25.8282	0.022176	32.8011
		0.00768	9.50102	0.0372245	14.9653	0.0809592	26.6591	-0.0877306	25.7998	0.0222	32.8128
		0.007776	8.91307	0.0372367	15.0294	0.0809673	27.072	-0.0876939	25.6735	0.022216	32.8385
		0.007856	8.70053	0.0372449	15.1945	0.080951	26.7067	-0.0876653	25.6649	0.022216	32.8577
		0.00788	8.7433	0.0372531	15.3048	0.0808898	26.774	-0.0876531	25.7092	0.0222	32.8731
		0.007896	8.80421	0.0372408	15.0907	0.0809469	27.0277	-0.087649	25.8181	0.022208	32.8884
		0.007864	8.79902	0.0372367	15.0128	0.080902	26.5316	-0.0876612	25.99	0.02224	32.9103
		0.007856	8.71867	0.0372571	15.1971	0.0809265	26.9194	-0.0877184	26.3396	0.022232	32.9295
		0.007936	8.52168	0.0372816	15.246	0.0809306	26.7648	-0.0877673	26.6105	0.022256	32.9489
		0.00796	8.07634	0.0373102	15.1351	0.0809388	26.6856	-0.0877878	26.6627	0.022288	32.9671
		0.008024	7.50398	0.0373143	15.069	0.0809959	27.1229	-0.0877878	26.6073	0.02232	32.9878
		0.00808	6.9625	0.0373224	14.921	0.0810449	26.8448	-0.0878367	26.9151	0.022336	32.9969
		0.008112	6.54946	0.0373551	14.7657	0.0810776	27.2748	-0.0878939	27.1159	0.022344	33.0137
		0.008176	6.19742	0.0373959	14.7901	0.0811633	27.5107	-0.0878857	27.11	0.022392	33.0345
		0.008256	5.8932	0.0374245	14.7611	0.0812204	27.6864	-0.0879673	27.6207	0.022384	33.0552
		0.008288	5.634	0.0374408	14.6276	0.0812653	28.2123	-0.0880735	28.1129	0.022464	33.0798
		0.008296	5.46811	0.0374735	14.5114	0.0812653	27.989	-0.0881265	28.2708	0.022536	33.0993
		0.008264	5.42923	0.0374898	14.512	0.0812531	28.3531	-0.0881959	28.5979	0.022568	33.1135
		0.008256	5.4085	0.0374694	14.4479	0.0813469	28.8209	-0.0883143	29.0393	0.022536	33.1278
		0.008232	5.21798	0.0374653	14.3494	0.0812571	27.9819	-0.0883918	29.2711	0.022552	33.1524
		0.008272	4.94328	0.0374816	14.1003	0.0812939	28.7173	-0.0885061	29.6815	0.022608	33.1654
		0.008256	4.79429	0.0374939	13.8956	0.0814245	28.8765	-0.0886204	29.8908	0.022592	33.1822
		0.00824	4.80077	0.0374816	13.8599	0.0813755	27.9165	-0.0886898	29.9166	0.0226	33.2016
		0.0082	4.88621	0.0374898	13.9346	0.0814	28.9286	-0.0887837	30.1234	0.022584	33.2224
		0.0082	4.92898	0.037498	13.8137	0.0815184	28.8493	-0.0888327	30.1135	0.0226	33.2418
		0.008192	4.85659	0.0375061	13.6763	0.0814612	27.894	-0.0888367	30.0355	0.022648	33.2626
		0.008264	4.63416	0.037502	13.5812	0.0815551	28.8974	-0.0888694	30.1981	0.022688	33.2794
		0.008296	4.3897	0.0374939	13.568	0.0816612	28.4257	-0.088898	30.2224	0.022728	33.2976
		0.008304	4.34698	0.0375184	13.4398	0.0816857	28.2474	-0.0889143	30.159	0.02276	33.3183
		0.008312	4.46621	0.0375102	13.2832	0.0817347	28.5664	-0.0889388	30.2925	0.02276	33.339
		0.008304	4.61098	0.0375102	13.0281	0.0817633	28.2064	-0.0889551	30.2409	0.022784	33.352
		0.008264	4.69608	0.0375184	12.8656	0.0817551	28.4191	-0.0889551	30.2786	0.0228	33.3649
		0.008264	4.76448	0.0375347	12.9289	0.0818245	28.7614	-0.0889796	30.4815	0.022792	33.3883
		0.008208	5.0171	0.0375306	13.2771	0.0818082	28.1152	-0.0889837	30.4776	0.022792	33.4077
		0.008128	5.44738	0.0375184	13.3446	0.0818898	28.9999	-0.0889755	30.4551	0.022824	33.4233
		0.008056	5.94226	0.037498	13.2164	0.0819918	28.8671	-0.0889673	30.3447	0.02284	33.4401
		0.008008	6.26592	0.037502	13.0796	0.0819469	28.5328	-0.0889224	30.1003	0.022872	33.457
		0.007968	6.38875	0.0375102	13.0499	0.0820082	29.0508	-0.0888694	29.7607	0.022888	33.4738
		0.007952	6.39648	0.0375102	13.3009	0.082	28.4549	-0.0888	29.4634	0.022872	33.4829
		0.007912	6.59578	0.0375224	13.4238	0.082	28.6042	-0.0886776	29.0082	0.02288	33.501
		0.007824	6.94694	0.0375102	13.2804	0.082049	28.8269	-0.0886	28.8021	0.022896	33.514
		0.007688	7.34482	0.0374939	12.9758	0.0820571	28.4998	-0.0885184	28.5424	0.022952	33.5373
		0.007664	7.5107	0.0374816	12.9818	0.0820776	29.1386	-0.0884245	28.138	0.022992	33.5762
		0.007688	7.52626	0.037502	13.365	0.0821143	28.7541	-0.0883224	27.801	0.023072	33.6332
		0.007688	7.53274	0.0375184	13.8156	0.0820122	28.3419	-0.0882735	27.7514	0.023184	33.6967
		0.007672	7.68043	0.0375265	13.8454	0.0820408	28.9847	-0.0881755	27.3569	0.023272	33.7499
		0.007664	7.99488	0.0374939	13.4899	0.082	28.188	-0.0880612	27.0774	0.023328	33.8043
		0.007608	8.3495	0.0374898	13.4106	0.0819592	28.4013	-0.0880041	27.0821	0.023368	33.8561
		0.00756	8.61888	0.0375102	13.6268	0.0820286	29.0395	-0.0879429	26.8145	0.023384	33.8989
		0.007536	8.71738	0.0375388	14.1871	0.0819755	28.0967	-0.0878571	26.3936	0.0234	33.9546
		0.00752	8.77829	0.0375796	14.5385	0.081951	28.7349	-0.0878082	26.3468	0.023432	34.0052
		0.007528	8.90789	0.0376204	14.3469	0.0819959	28.5102	-0.0877878	26.1882	0.023512	34.0596
		0.007496	9.16838	0.0376286	14.2431	0.0819061	27.9566	-0.0877429	25.8935	0.023608	34.1063
		0.007496	9.26688	0.0376245	14.4386	0.081898	28.2084	-0.0877224	25.9622	0.023632	34.1594
		0.007536	9.23059	0.0376082	14.3686	0.0818735	27.9269	-0.087702	25.8472	0.023616	34.2009
		0.007544	9.33038	0.0376122	14.3739	0.0818163	27.8735	-0.0876571	25.6225	0.023632	34.2359
		0.0076	9.5557	0.0376204	14.7407	0.0818122	27.9145	-0.0876531	25.6774	0.023672	34.2773
		0.007592	9.60235	0.0376367	15.0829	0.0817592	27.4408	-0.0876041	25.5512	0.023704	34.324
		0.007584	9.38866	0.0376449	15.0578	0.0817429	27.6139	-0.0875306	25.316	0.023808	34.3797
		0.007568	9.16579	0.0376531	15.0941	0.0817224	27.3985	-0.0875388	25.5222	0.023848	34.4351
		0.007624	8.8703	0.0376653	15.2599	0.0816939	27.4197	-0.087551	25.583	0.023856	34.4646
		0.007616	8.53464	0.0376816	15.3867	0.0816857	27.5915	-0.0875061	25.4284	0.023896	34.5084
		0.007608	8.36875	0.0376694	15.5366	0.0816694	27.3952	-0.0875061	25.4515	0.02388	34.5768
		0.007584	8.418	0.0376735	15.6463	0.0816857	27.5828	-0.0875469	25.581	0.02392	34.6377
		0.007608	8.52038	0.0376653	15.7283	0.0817224	27.4593	-0.0875102	25.388	0.023952	34.7012
		0.007592	8.60851	0.0376735	15.8585	0.0816857	27.2796	-0.0875388	25.5208	0.024112	34.7699
		0.007504	8.89882	0.0376735	15.8651	0.0816857	27.5432	-0.0875755	25.7528	0.024224	34.836
		0.00748	9.38573	0.0376898	15.8995	0.0816531	27.3179	-0.0876612	26.214	0.024272	34.8995
		0.007488	9.71342	0.0376857	16.0138	0.0816531	27.6258	-0.0877184	26.479	0.024312	34.9591
		0.007528	9.47251	0.0377265	16.0045	0.0816653	27.6436	-0.0877878	26.7202	0.02436	35.0161
		0.00764	8.77723	0.0377429	15.943	0.0816694	27.4632	-0.0878286	27.0228	0.024408	35.0641
		0.007816	7.84978	0.0377592	15.7389	0.0817388	27.8577	-0.0879388	27.4568	0.024424	35.0939
		0.007968	6.91747	0.0377837	15.6418	0.0817878	27.6271	-0.0880204	27.6206	0.024424	35.112
		0.008024	6.11962	0.0378286	15.8439	0.0818041	28.1318	-0.0881306	28.1207	0.024408	35.1302
		0.008064	5.67806	0.037849	16.1564	0.0819143	28.7238	-0.0882612	28.6215	0.024432	35.1444
		0.008104	5.54458	0.0378939	16.1902	0.081902	27.937	-0.0883673	28.9393	0.02444	35.1561
		0.00812	5.6016	0.0379347	15.9245	0.0819469	28.817	-0.0884898	29.2545	0.024448	35.1781
		0.00812	5.67029	0.0380041	15.6867	0.0820082	28.3809	-0.0885714	29.4521	0.024448	35.2015
		0.008112	5.65085	0.038049	15.7561	0.0819755	28.1331	-0.0886653	29.7178	0.024504	35.2131
		0.008144	5.4409	0.0380857	15.9596	0.0820082	28.5869	-0.0887796	30.0165	0.024592	35.23
		0.008208	5.10653	0.038102	16.0256	0.0820286	28.2685	-0.0888857	30.2741	0.024632	35.2507
		0.008264	4.78032	0.0381061	15.8492	0.0820327	28.4905	-0.0889306	30.3435	0.02464	35.2702
		0.008296	4.55141	0.038098	15.3444	0.0821347	29.2205	-0.0890122	30.683	0.0246	35.2844
		0.008328	4.31717	0.0380898	15.1099	0.0821143	28.3815	-0.0890776	30.8204	0.024584	35.3039
		0.008344	4.08	0.0380694	15.3398	0.0821592	29.1063	-0.0891388	30.9743	0.024584	35.3194
		0.008368	3.86616	0.0380694	15.3042	0.0822449	29.025	-0.0891469	30.9591	0.024568	35.3388
		0.008384	3.70675	0.0380857	15.0875	0.0821959	28.5447	-0.0892122	31.2121	0.024592	35.3583
		0.008368	3.67176	0.0380898	14.7836	0.0822571	29.3243	-0.0892735	31.3146	0.02464	35.3738
		0.00836	3.62381	0.0381143	14.6739	0.0823673	29.0778	-0.0893265	31.3768	0.024672	35.3907
		0.008392	3.48384	0.0381429	14.697	0.0823592	28.6801	-0.0893061	31.2096	0.02472	35.4036
		0.00844	3.27518	0.0381429	14.6356	0.0825224	29.4901	-0.089298	31.1237	0.024792	35.4283
		0.008464	3.13781	0.0381673	14.514	0.0826041	28.6378	-0.0893184	31.1792	0.02484	35.4542
		0.008464	3.13262	0.0381714	14.3692	0.0826898	28.7792	-0.089302	31.0233	0.024848	35.471
		0.008424	3.22075	0.0381755	14.2299	0.0827796	28.8684	-0.0892939	30.9585	0.024824	35.484
		0.008424	3.26222	0.0381878	14.29	0.0828163	28.7211	-0.0893061	31.0689	0.024824	35.5008
		0.00844	3.21043	0.0382082	14.4116	0.0828245	28.9708	-0.089351	31.2823	0.024856	35.5216
		0.008464	3.05928	0.0382082	14.3739	0.0828082	28.7693	-0.0893102	31.1146	0.024848	35.5332
		0.008472	2.8537	0.0382082	14.2392	0.0827633	28.8222	-0.0892653	30.9942	0.0248	35.5514
		0.008504	2.69966	0.0382082	14.1751	0.0827837	29.0376	-0.0892204	30.9124	0.024856	35.5656
		0.008544	2.68411	0.0382	14.1117	0.0827306	28.5527	-0.0891796	30.7669	0.024888	35.5825
		0.00852	2.80838	0.0382	14.0575	0.0827265	29.0165	-0.0891143	30.4346	0.024928	35.598
		0.008456	3.11765	0.0382	13.9696	0.082751	28.6623	-0.0891102	30.4834	0.024944	35.6149
		0.008392	3.52282	0.0382	13.7813	0.0826898	28.2547	-0.0891061	30.3711	0.024976	35.6317
		0.00828	3.94781	0.0382122	13.7489	0.0826939	28.8578	-0.0890531	29.9991	0.024984	35.6447
		0.008192	4.31189	0.0382204	13.8486	0.0826898	28.1212	-0.0890204	29.9337	0.024968	35.6616
		0.008064	4.66781	0.0382245	13.9147	0.082649	28.2441	-0.089	29.8657	0.024952	35.681
		0.007968	5.0328	0.0382082	13.9788	0.0827224	28.5012	-0.0889469	29.5374	0.02496	35.694
		0.007832	5.38646	0.0382163	13.7482	0.0826898	27.7143	-0.0888816	29.3491	0.025008	35.7082
		0.007728	5.58734	0.0382245	13.6272	0.0826898	28.1484	-0.088849	29.2796	0.025008	35.7315
		0.007656	5.61067	0.0382163	13.8578	0.0827102	27.9039	-0.0887469	28.9751	0.025024	35.7549
		0.007704	5.55365	0.0382245	14.2675	0.0826245	27.1884	-0.0886653	28.7108	0.025016	35.7704
		0.007736	5.6016	0.0382408	14.5061	0.0826286	27.964	-0.0885673	28.5138	0.025	35.7873
		0.007664	5.83613	0.0382245	14.6819	0.0826041	27.2782	-0.088498	28.3189	0.02504	35.8028
		0.007648	6.25037	0.0382163	14.8272	0.082502	27.0536	-0.0884163	28.134	0.025096	35.8197
		0.007568	6.75274	0.0382122	15.0572	0.0825673	27.7169	-0.0884082	28.0639	0.025176	35.8352
		0.007504	7.17504	0.0382204	15.3849	0.0825224	27.0628	-0.0883347	27.7381	0.0252	35.8585
		0.007464	7.49904	0.0382286	15.4753	0.0824776	27.4222	-0.0882816	27.4772	0.025184	35.8832
		0.007448	7.76462	0.038249	15.3709	0.082502	27.5623	-0.0882653	27.4514	0.0252	35.9013
		0.00744	7.97683	0.0382449	15.2962	0.0824367	27.0872	-0.0882245	27.2836	0.0252	35.9169
		0.007448	8.00016	0.038249	15.39	0.0824041	27.7188	-0.0881714	27.0926	0.02512	35.9324
		0.007472	7.86442	0.0382449	15.4626	0.0823837	27.3105	-0.088151	27.1375	0.025112	35.9519
		0.007448	7.80101	0.0382531	15.6305	0.082249	26.8031	-0.088098	27.0239	0.025104	35.9687
		0.007416	7.91232	0.038249	15.692	0.0822939	27.6693	-0.0880694	26.9849	0.0252	35.9907
		0.007424	8.22288	0.0382449	15.7627	0.0822694	26.8652	-0.088098	27.2637	0.025248	36.0076
		0.007448	8.59954	0.0382571	15.9425	0.0821878	26.9425	-0.0881469	27.5069	0.025272	36.027
		0.00748	8.7731	0.0382612	16.1486	0.0822531	27.4546	-0.0881714	27.5645	0.025304	36.0386
		0.007496	8.68627	0.0382612	16.1764	0.0822122	27.0152	-0.0882449	27.9153	0.025384	36.0578
		0.007488	8.45688	0.0382694	16.2537	0.0821918	27.4354	-0.0882776	27.9464	0.02544	36.0783
		0.007472	8.3195	0.0382612	16.3567	0.0822	27.4797	-0.0882939	27.9081	0.02544	36.0949
		0.007512	8.23915	0.038249	16.4116	0.0821714	27.4202	-0.0883224	28.1393	0.025424	36.1038
		0.007528	8.20286	0.0382367	16.3707	0.0821959	27.7559	-0.0883551	28.3355	0.025448	36.1206
		0.007496	8.17435	0.0382449	16.3231	0.0822	27.3767	-0.0884408	28.648	0.025464	36.1373
		0.007488	8.23008	0.0382857	16.3158	0.0822122	27.5789	-0.0885143	29.0054	0.025504	36.1554
		0.007496	8.35709	0.0384082	16.2828	0.0822735	27.7117	-0.0885796	29.1693	0.025528	36.1749
		0.007496	8.67072	0.0385306	16.2887	0.0822531	27.495	-0.0886776	29.495	0.025648	36.1969
		0.007504	8.93381	0.038649	16.2669	0.082249	28.0922	-0.0888041	29.8756	0.025672	36.2176
		0.007544	8.96362	0.0387347	16.3178	0.0822571	27.8359	-0.088898	30.1399	0.02568	36.2397
		0.007568	8.72256	0.0387796	16.3594	0.0821959	27.9257	-0.0890163	30.4669	0.02556	36.2578
		0.007584	8.32502	0.0387714	16.3488	0.0822286	28.2402	-0.0890816	30.6083	0.025592	36.2721
		0.007656	7.80322	0.038751	16.2028	0.0821796	27.7526	-0.0891796	30.8032	0.025544	36.2785
		0.007728	7.21522	0.0387388	16.0957	0.0821918	27.9429	-0.0892857	31.082	0.025544	36.2941
		0.007832	6.71909	0.0387429	16.0144	0.0822245	27.9251	-0.0893102	30.9632	0.025528	36.3135
		0.007944	6.27245	0.0387592	15.9583	0.0821796	27.7896	-0.0893796	31.1904	0.025624	36.3278
		0.008032	5.91653	0.0387633	15.8156	0.0822204	28.3723	-0.0894653	31.3873	0.025648	36.3485
		0.00808	5.67418	0.0387755	15.552	0.0822327	27.9416	-0.0894653	31.2492	0.025712	36.3757
		0.008112	5.55235	0.0387755	15.361	0.0822163	28.3149	-0.0894857	31.3067	0.025768	36.3991
		0.008192	5.36702	0.0388	15.2303	0.0822653	28.5256	-0.0895143	31.4315	0.025752	36.4146
		0.00824	5.0508	0.0387878	15.0803	0.0822816	28.3109	-0.0895224	31.411	0.025696	36.4237
		0.008272	4.72853	0.0387959	14.9124	0.0823102	28.6486	-0.0895551	31.5914	0.025696	36.4405
		0.008264	4.46851	0.0388	14.9673	0.0823673	28.3446	-0.0895673	31.6436	0.025728	36.46
		0.008272	4.242	0.0388	14.9428	0.0823633	28.348	-0.089551	31.4963	0.025752	36.4755
		0.008312	4.0463	0.0387878	14.7736	0.0824327	28.9274	-0.0895673	31.6284	0.025768	36.495
		0.008368	3.96595	0.0387878	14.6765	0.0824163	28.0381	-0.089551	31.4997	0.025824	36.5066
		0.008384	3.96984	0.0387796	14.6474	0.0824041	28.5092	-0.0895143	31.2797	0.025832	36.5209
		0.008392	4.0139	0.0387837	14.5417	0.0824653	28.5257	-0.0895347	31.3821	0.025904	36.5339
		0.0084	3.97373	0.0387837	14.4347	0.0823878	27.9753	-0.0895306	31.318	0.025968	36.5559
		0.008424	3.84154	0.0387959	14.3428	0.0824122	28.4708	-0.0895184	31.1304	0.026048	36.5727
		0.008456	3.59918	0.0388082	14.323	0.0824694	28.0764	-0.0895265	31.1204	0.025992	36.5948
		0.00852	3.39182	0.0388122	14.255	0.0824163	27.7116	-0.0894776	30.9195	0.025976	36.6116
		0.008568	3.29203	0.0388245	14.0415	0.0824776	28.3723	-0.0893633	30.4551	0.025992	36.6233
		0.008568	3.32832	0.0388245	13.8989	0.0824898	27.3727	-0.0893143	30.3229	0.026032	36.6401
		0.008528	3.41645	0.0388286	13.9584	0.0824041	27.4176	-0.0892	29.8737	0.026072	36.6557
		0.008504	3.48773	0.0388286	14.0773	0.0824531	27.9706	-0.0890898	29.4732	0.026072	36.6751
		0.008488	3.50198	0.0388245	14.0073	0.0824122	26.9875	-0.0890286	29.3781	0.026112	36.6933
		0.00848	3.51494	0.0388204	13.7939	0.0824041	27.5095	-0.0889837	29.1369	0.026072	36.7088
		0.008456	3.51106	0.0388204	13.677	0.0824816	27.5986	-0.0889143	28.7952	0.026024	36.727
		0.008456	3.48902	0.0388245	13.7318	0.0824041	26.4794	-0.0888857	28.7245	0.026056	36.7477
		0.008464	3.39312	0.0388449	13.6743	0.0823878	27.2022	-0.0887878	28.4332	0.02612	36.7645
		0.00848	3.32573	0.0388653	13.6347	0.0824327	27.1758	-0.0886694	27.9561	0.026144	36.784
		0.008464	3.32832	0.0388776	13.9499	0.0822653	26.2567	-0.0885837	27.6654	0.02624	36.8021
		0.008448	3.39701	0.0388857	14.2412	0.0822571	27.3052	-0.0884776	27.4124	0.026272	36.8268
		0.008432	3.52531	0.0389102	13.9459	0.0822898	26.9894	-0.0883714	27.0589	0.026232	36.8384
		0.008392	3.79618	0.0389388	13.5587	0.0822082	26.4893	-0.0882776	26.7815	0.026232	36.8436
		0.008304	4.31294	0.0389837	13.7865	0.0822531	27.1216	-0.0882163	26.6223	0.026272	36.863
		0.008128	5.12765	0.0390408	14.1744	0.0822653	26.5614	-0.0881102	26.4011	0.026352	36.8864
		0.007952	6.012	0.0390531	14.2332	0.0822367	26.5521	-0.0880367	26.2491	0.02636	36.9071
		0.007768	6.75283	0.0390776	14.3667	0.0823102	26.9426	-0.087951	26.0727	0.026312	36.9265
		0.0076	7.15949	0.039098	14.5827	0.0822694	25.8987	-0.0879061	25.9656	0.026296	36.9408
		0.007536	7.2191	0.0391061	14.7142	0.0822	26.186	-0.0878694	26.0804	0.026296	36.9525
		0.007544	7.09469	0.0391061	14.8648	0.082298	26.9696	-0.0878571	26.0884	0.026352	36.9693
		0.007552	6.95472	0.0391265	14.9323	0.0822041	25.7204	-0.0877959	25.8439	0.0264	36.9849
		0.007544	6.96509	0.0391469	15.3056	0.0822122	26.6869	-0.0878	25.9688	0.026352	37.003
		0.007512	7.12838	0.0391714	15.6472	0.0822939	26.969	-0.0877837	25.9166	0.02636	37.0237
		0.007504	7.53384	0.0391633	15.5547	0.0822449	26.2774	-0.0877306	25.542	0.026456	37.0458
		0.007488	8.12952	0.0391796	15.2746	0.0822449	26.8673	-0.0877224	25.5883	0.026488	37.0678
		0.007464	8.59171	0.0392	15.3689	0.0823551	27.0595	-0.0877469	25.8413	0.026544	37.0872
		0.007464	8.86382	0.0392082	15.394	0.0822735	26.2667	-0.0877306	25.7574	0.026648	37.1067
		0.007488	8.92603	0.0391878	15.4713	0.0823102	27.4004	-0.0877551	26.0289	0.026672	37.1287
		0.00752	8.90011	0.0391837	15.5135	0.0823633	26.9517	-0.0877796	26.239	0.026656	37.1391
		0.007496	8.88845	0.0391918	15.6041	0.0822939	26.6135	-0.0877959	26.2978	0.02664	37.1469
		0.007464	9.14765	0.0391796	15.6967	0.0823469	27.5926	-0.087849	26.5457	0.02664	37.1715
		0.007472	9.52968	0.0391796	15.7476	0.0823714	27.0641	-0.0879102	26.8046	0.026664	37.1948
		0.007504	9.78466	0.0392041	15.772	0.0823184	27.115	-0.0879592	26.9012	0.026672	37.2065
		0.00752	9.73939	0.0392163	15.6478	0.0823796	27.6164	-0.0880367	27.2414	0.02664	37.2194
		0.007504	9.57653	0.0392204	15.5348	0.0823837	27.1725	-0.0880653	27.2909	0.026664	37.2441
		0.007496	9.5507	0.0392286	15.6815	0.0823878	27.5728	-0.0880653	27.3431	0.026688	37.2583
		0.00752	9.76411	0.0392531	15.9305	0.0824327	27.7452	-0.0881265	27.6589	0.026768	37.2739
		0.00756	10.12	0.0392694	15.8017	0.0823918	27.4076	-0.0881837	27.7607	0.02676	37.2855
		0.007592	10.3686	0.0392776	15.6015	0.0824041	28.2797	-0.0882163	27.9325	0.026704	37.2998
		0.007592	10.3154	0.0393102	15.585	0.0824082	27.8186	-0.0883551	28.4743	0.026728	37.327
		0.00764	10.0951	0.0393061	15.4747	0.0823265	27.9303	-0.0884286	28.6368	0.026736	37.3426
		0.007688	9.86621	0.039298	15.2619	0.0824367	28.4945	-0.0884735	28.8602	0.026824	37.3607
		0.007736	9.72672	0.0392939	15.3294	0.0824776	27.7063	-0.0885959	29.3655	0.02688	37.3763
		0.007744	9.71635	0.0392612	15.5052	0.082498	28.0214	-0.0886735	29.5083	0.026872	37.3983
		0.007744	9.80789	0.0392245	15.3684	0.0826327	28.5143	-0.0887347	29.6544	0.026864	37.4138
		0.007656	10.147	0.0392204	15.2852	0.0826163	27.5042	-0.0888327	29.9186	0.02688	37.4294
		0.007624	10.5746	0.0392082	15.2534	0.0826041	28.4469	-0.0888816	29.7694	0.026928	37.454
		0.00764	10.7781	0.0391714	14.8814	0.0826857	28.7402	-0.0888857	29.7258	0.026984	37.4696
		0.007672	10.5384	0.0391714	14.3482	0.0825714	27.6475	-0.088951	30.0693	0.026944	37.4864
		0.007744	9.94262	0.0391633	14.3363	0.082551	28.6055	-0.0889633	29.9603	0.02696	37.5097
		0.007832	9.2005	0.039151	14.837	0.0825959	28.7013	-0.0889878	30.0164	0.026952	37.5227
		0.007984	8.47536	0.0391306	14.664	0.0824857	27.8266	-0.0890449	30.3962	0.027072	37.5421
		0.008024	7.86024	0.0391306	13.9464	0.0824857	28.7549	-0.0890531	30.3235	0.027104	37.5525
		0.008096	7.29686	0.0391184	13.7561	0.0825306	28.5349	-0.0890449	30.1055	0.027128	37.5758
		0.008152	6.87826	0.0391102	14.0733	0.0824694	27.9575	-0.0890612	30.2502	0.027152	37.5914
		0.008248	6.72014	0.0391102	14.1203	0.0825102	28.7727	-0.0890408	30.0415	0.027168	37.6056
		0.008272	6.74347	0.039098	13.5791	0.0825143	28.1034	-0.0890122	29.7845	0.02716	37.6224
		0.008272	6.82642	0.0390816	13.2283	0.0824204	27.9952	-0.0890082	29.7231	0.02716	37.6429
		0.00828	6.84067	0.039102	13.1537	0.0824612	28.3361	-0.0889837	29.5566	0.027168	37.6672
		0.00828	6.80309	0.0391184	13.2515	0.0823918	27.5855	-0.0889633	29.3128	0.02716	37.6839
		0.008288	6.7331	0.0391224	13.2025	0.0823551	27.865	-0.088951	29.213	0.02716	37.7043
		0.008272	6.57523	0.0391184	13.2871	0.0824204	27.974	-0.0888857	28.9606	0.027184	37.7172
		0.00828	6.2893	0.0390939	13.2593	0.0823796	27.1376	-0.088849	28.9077	0.027216	37.7263
		0.008328	5.88802	0.0390694	13.0895	0.0824082	27.8967	-0.0888082	28.7874	0.027328	37.7432
		0.00836	5.55883	0.0390571	12.9389	0.0824735	27.4864	-0.0887061	28.4505	0.02736	37.7664
		0.008384	5.35666	0.039049	12.9415	0.0824327	27.2115	-0.0886041	28.2793	0.027344	37.7794
		0.008384	5.31518	0.0390612	13.1272	0.082449	27.4302	-0.0885388	28.0244	0.027248	37.7963
		0.008408	5.38776	0.0390612	13.2012	0.0824122	27.1329	-0.0884082	27.6094	0.027272	37.8157
		0.008384	5.46682	0.0390612	13.2303	0.0823551	27.3429	-0.0883347	27.3973	0.027296	37.8325
		0.008392	5.51218	0.0390531	13.151	0.0823429	27.4248	-0.0882449	27.1541	0.02728	37.8468
		0.008392	5.5031	0.039049	13.1913	0.082249	26.9346	-0.088151	26.8416	0.027352	37.8649
		0.008424	5.44608	0.0390367	13.299	0.082249	27.7036	-0.088098	26.8298	0.02744	37.8883
		0.008424	5.32426	0.0390408	13.3968	0.0822612	27.2378	-0.0880449	26.6065	0.027496	37.9116
		0.008432	5.09486	0.0390571	13.4728	0.0821878	26.922	-0.0879429	26.3561	0.027528	37.9233
		0.008464	4.79846	0.0390612	13.6499	0.0822327	27.4717	-0.0879143	26.2471	0.027576	37.9388
		0.008456	4.64846	0.039049	13.7186	0.0822571	27.0733	-0.0878898	26.1777	0.027552	37.9583
		0.008456	4.69498	0.0390694	13.7847	0.0822857	27.4282	-0.0878408	26.0746	0.027568	37.9751
		0.008432	4.94722	0.039049	13.9399	0.0823347	27.5022	-0.0878245	25.992	0.027552	37.9971
		0.008376	5.36184	0.0390449	14.5041	0.0823388	27.3568	-0.0878204	26.0078	0.027488	38.0127
		0.008336	5.78304	0.0390571	14.73	0.0823714	27.6046	-0.0878204	26.097	0.027512	38.0269
		0.00828	5.97096	0.039102	14.4155	0.0823755	27.306	-0.0877878	25.8643	0.0276	38.0438
		0.008288	5.98133	0.0391224	14.1433	0.0823714	27.4777	-0.0877755	25.7798	0.027608	38.0632
		0.008296	5.97226	0.0392	14.4519	0.0824531	27.8391	-0.0877714	25.8294	0.027616	38.0788
		0.00828	6.09389	0.0392571	14.9025	0.0824735	27.4803	-0.0877592	25.6622	0.027648	38.0982
		0.008192	6.40445	0.0392816	14.7624	0.0825265	28.2415	-0.0877633	25.7989	0.027672	38.1125
		0.008128	6.8148	0.0392816	14.4341	0.0826	28.0353	-0.0878	26.1406	0.027728	38.1306
		0.008064	7.25021	0.0393265	14.6119	0.0825388	27.6211	-0.0878367	26.3256	0.027736	38.1449
		0.008	7.67131	0.0393429	15.2587	0.0825837	28.8077	-0.0878449	26.3983	0.027744	38.1643
		0.007936	8.02982	0.0393551	15.3849	0.0826449	28.3717	-0.0878735	26.66	0.027792	38.1889
		0.00792	8.16677	0.0393796	15.1544	0.0825755	27.8305	-0.0879673	26.9619	0.027824	38.2097
		0.00784	8.13835	0.0394041	15.1549	0.0826653	29.2093	-0.0880449	27.1503	0.027824	38.233
		0.007808	8.14742	0.0394122	15.3881	0.0827388	28.4324	-0.0881429	27.585	0.027832	38.2524
		0.007776	8.40523	0.0394122	15.6008	0.0827673	28.5004	-0.0882612	28.0731	0.027768	38.2719
		0.007776	8.81069	0.0394	15.3768	0.0829102	29.4815	-0.0884	28.4973	0.027768	38.2861
		0.007784	9.21504	0.0393918	15.02	0.0829918	28.7991	-0.0884735	28.6996	0.027776	38.3004
		0.007808	9.46906	0.0393959	15.0234	0.0830367	28.8202	-0.0885673	29.0755	0.027824	38.3108
		0.00776	9.71227	0.0393918	15.4555	0.0831551	28.9134	-0.0886857	29.3609	0.027816	38.3302
		0.007728	9.94248	0.0394041	15.4504	0.0832	28.5883	-0.0887959	29.5956	0.027872	38.3419
		0.007744	10.0394	0.0394163	15.159	0.0832898	28.548	-0.0888816	29.877	0.027992	38.3652
		0.007768	9.96293	0.0394286	15.0804	0.0833429	28.6822	-0.0889796	30.0937	0.02808	38.3743
		0.007808	9.88646	0.0394408	15.1055	0.0834286	28.8447	-0.0890408	30.2582	0.028128	38.3937
		0.007824	9.96422	0.0394531	15.013	0.083498	29.0204	-0.0891306	30.4874	0.028096	38.4144
		0.007832	10.2247	0.0394571	14.8807	0.0835306	28.9789	-0.0892286	30.8395	0.028048	38.4248
		0.007816	10.6265	0.0394735	14.8583	0.0836	29.4876	-0.0893306	30.9498	0.028024	38.4481
		0.00788	10.9414	0.0394857	14.7981	0.0837102	29.2278	-0.0894082	31.1507	0.028072	38.4637
		0.00788	11.0321	0.039502	15.1865	0.0837347	29.2285	-0.0894857	31.3324	0.028088	38.4857
		0.007888	10.9155	0.039502	15.2738	0.0838163	29.4306	-0.0895143	31.3715	0.028096	38.5104
		0.007864	10.7716	0.039502	14.4757	0.0838776	29.3388	-0.0895102	31.1977	0.028176	38.5311
		0.007864	10.7392	0.039498	13.8955	0.0839143	29.3024	-0.0895102	31.3266	0.028208	38.5479
		0.007808	10.8909	0.039498	14.471	0.083951	29.2265	-0.0895429	31.3959	0.028176	38.5648
		0.007848	11.1888	0.0394857	14.7154	0.0839551	29.1492	-0.089551	31.2724	0.028216	38.5816
		0.007864	11.3443	0.0394776	13.9583	0.0839918	29.5073	-0.0895755	31.4184	0.028224	38.605
		0.007952	11.2134	0.0394694	13.5156	0.0839388	28.6801	-0.0896	31.513	0.02824	38.6205
		0.007992	10.9544	0.0394653	13.7489	0.0839143	29.1598	-0.0895878	31.318	0.028264	38.6387
		0.008008	10.7988	0.0394612	13.9366	0.0839633	29.175	-0.0895878	31.4727	0.02828	38.6555
		0.008	10.712	0.0394653	13.7933	0.0839592	29.0052	-0.0895878	31.4033	0.028336	38.6749
		0.007984	10.6135	0.0394694	13.675	0.0840041	29.173	-0.0895755	31.3537	0.028376	38.6905
		0.008008	10.3738	0.0394653	13.5891	0.0840449	28.9319	-0.0895796	31.3068	0.028416	38.7099
		0.008008	10.0824	0.0394612	13.4015	0.0840653	28.9325	-0.0895673	31.2697	0.028424	38.7203
		0.008016	9.63442	0.0394571	13.2369	0.0840327	28.9259	-0.0895673	31.2387	0.028408	38.732
		0.00804	9.07114	0.0394531	13.1741	0.084	28.8704	-0.0895224	31.0715	0.028368	38.7527
		0.008112	8.53219	0.039449	13.0915	0.0839673	28.7726	-0.0894408	30.6718	0.028312	38.7773
		0.00816	8.19298	0.039449	13.0181	0.0839184	28.6234	-0.0893918	30.5937	0.028328	38.7994
		0.008208	8.0688	0.0394449	13.1113	0.0839061	28.6491	-0.0893224	30.2852	0.028344	38.8175
		0.008256	8.02747	0.0394571	13.1794	0.0839184	28.4807	-0.0892082	29.7884	0.028432	38.8305
		0.008312	7.75032	0.0394571	13.184	0.0838612	28.1153	-0.0891469	29.6636	0.02844	38.8538
		0.008408	7.29427	0.0394531	13.2619	0.0838367	28.3908	-0.0891061	29.6867	0.028432	38.868
		0.008432	6.84586	0.0394571	13.4278	0.0837878	28.1133	-0.0890286	29.4409	0.028424	38.881
		0.00844	6.51571	0.0394612	13.6855	0.0836898	28.2606	-0.0889633	29.2427	0.028424	38.8992
		0.008464	6.31013	0.0394367	13.7106	0.0836816	28.367	-0.0889347	29.1554	0.028392	38.9251
		0.008464	6.17054	0.0394327	13.5607	0.0836163	27.8642	-0.0888694	28.8528	0.028408	38.9406
		0.008448	5.958	0.0394327	13.5361	0.0836041	28.2282	-0.0887959	28.5456	0.028488	38.9601
		0.0084	5.64437	0.0394204	13.8955	0.0836122	27.7744	-0.0887469	28.4207	0.028536	38.9795
		0.008408	5.3424	0.0394245	14.2272	0.0835959	27.8186	-0.088649	28.1637	0.028568	38.9951
		0.008448	5.09746	0.0394286	14.2568	0.0836327	28.0836	-0.0885429	27.8796	0.028592	39.0132
		0.00844	4.97434	0.0394286	14.0388	0.0835551	27.4632	-0.0884939	27.7528	0.0286	39.0326
		0.008424	5.00933	0.0394408	14.2021	0.0835184	28.0988	-0.0884082	27.3787	0.028536	39.0495
		0.008424	5.07413	0.039449	14.7327	0.0835102	27.8794	-0.0883347	27.2275	0.028576	39.0637
		0.008464	5.00414	0.039449	14.878	0.0834204	27.3621	-0.0883184	27.3193	0.028624	39.0832
		0.00848	4.75061	0.039449	14.5702	0.0834408	27.9685	-0.0883061	27.2579	0.02864	39.1013
		0.008512	4.41542	0.0394531	14.6408	0.0834939	27.8543	-0.0882816	27.238	0.028672	39.1234
		0.008512	4.12666	0.039449	14.9427	0.083502	27.9553	-0.0883102	27.4463	0.028672	39.135
		0.008544	3.9504	0.0394612	15.2526	0.0835224	28.1185	-0.0882776	27.2618	0.028648	39.1558
		0.008568	3.9491	0.0394653	15.2586	0.0835184	28.2415	-0.0882694	27.2056	0.02872	39.1752
		0.00856	4.12666	0.0394939	15.2784	0.0835143	28.3161	-0.0882816	27.3569	0.02876	39.1933
		0.00848	4.52414	0.0395061	15.2922	0.0835184	28.2566	-0.088298	27.4792	0.02876	39.2127
		0.008408	4.99152	0.0395347	15.2031	0.0835143	28.3954	-0.0882776	27.4197	0.028792	39.2257
		0.008344	5.4085	0.0395673	15.1779	0.0836082	28.7277	-0.0883224	27.6815	0.028808	39.2463
		0.008304	5.55365	0.0396	15.4646	0.0835878	28.1245	-0.0883347	27.6703	0.028848	39.263
		0.008312	5.4409	0.0396	15.7401	0.0836122	28.8512	-0.088351	27.8513	0.02884	39.2784
		0.00836	5.04322	0.0396327	15.8267	0.083649	28.4779	-0.0883633	27.9299	0.02892	39.2925
		0.008392	4.58621	0.039649	16.1947	0.0836122	28.47	-0.0883878	27.9537	0.028928	39.3077
		0.008464	4.18493	0.0396531	16.4445	0.083649	28.978	-0.0883714	27.92	0.028896	39.3245
		0.008528	3.88301	0.0396531	16.1485	0.0836939	28.5499	-0.0884367	28.2866	0.028912	39.3464
		0.008576	3.67694	0.0396653	15.7249	0.0837102	28.91	-0.0884939	28.3944	0.028928	39.371
		0.008576	3.60955	0.0396612	16.0824	0.0838408	29.3599	-0.0885347	28.5616	0.028928	39.3917
		0.008608	3.7223	0.0396694	16.6942	0.0838163	28.3927	-0.0886367	29.137	0.02896	39.4086
		0.0086	4.08893	0.0396857	16.4616	0.0838408	29.282	-0.0887755	29.5222	0.028984	39.4358
		0.008544	4.69109	0.0396857	15.9523	0.083951	29.249	-0.0888163	29.612	0.028992	39.4526
		0.008368	5.48107	0.039698	15.9787	0.0839102	28.7231	-0.088898	29.9318	0.02908	39.4747
		0.008192	6.30086	0.0397143	16.2483	0.0839673	29.5383	-0.089	30.2377	0.02912	39.4889
		0.008072	6.93542	0.0397347	16.2007	0.0840204	29.056	-0.0891102	30.4656	0.029128	39.5019
		0.007992	7.26835	0.0397429	15.941	0.0839918	28.8876	-0.089151	30.6091	0.029064	39.5136
		0.00796	7.29298	0.0397755	15.6596	0.0840449	29.4603	-0.0892571	30.8799	0.029056	39.5343
		0.007928	7.20874	0.0398245	16.0323	0.0840122	28.6768	-0.0893592	31.1012	0.029112	39.546
		0.007928	7.11024	0.0398612	16.3381	0.0839837	28.9074	-0.0894286	31.1205	0.029112	39.5654
		0.007904	7.12709	0.039898	15.801	0.0840041	28.8896	-0.0894571	31.1476	0.029104	39.5835
		0.007928	7.17115	0.0399306	15.0743	0.0839918	28.5738	-0.0895388	31.4422	0.02908	39.6004
		0.007904	7.34093	0.0399306	15.2652	0.0839755	28.3722	-0.0895551	31.2989	0.029168	39.6185
		0.007888	7.7269	0.0399469	15.667	0.0839633	28.2024	-0.0895714	31.285	0.029248	39.638
		0.007904	8.22926	0.039951	15.3572	0.0839388	28.1509	-0.0895959	31.5089	0.02928	39.6535
		0.007928	8.64091	0.0399429	14.8233	0.0839714	28.0816	-0.0896082	31.4791	0.029288	39.6768
		0.007928	8.90659	0.0399469	14.7142	0.0839184	27.5953	-0.0895918	31.3648	0.02936	39.6937
		0.007888	9.05045	0.0399469	14.8332	0.083951	28.2276	-0.0896204	31.5802	0.02944	39.7105
		0.007936	8.98565	0.0399592	14.8173	0.0839796	27.7348	-0.0895959	31.3708	0.029512	39.7339
		0.008	8.81069	0.0399633	14.6382	0.0839102	27.6165	-0.0895714	31.2043	0.029464	39.7546
		0.008008	8.69405	0.0399673	14.4373	0.0839429	27.8854	-0.0895429	31.0642	0.029368	39.7728
		0.007976	8.71867	0.0399714	14.5681	0.0839061	27.1019	-0.0895265	30.8687	0.02936	39.7896
		0.007912	8.8068	0.0399918	14.9058	0.0838612	27.4203	-0.0894735	30.5958	0.029376	39.809
		0.007936	9.08544	0.0399878	14.6672	0.0838694	27.3615	-0.0894367	30.4966	0.029392	39.8272
		0.007936	9.42888	0.0399837	13.9728	0.0838	26.9552	-0.0894082	30.3579	0.029376	39.8492
		0.007952	9.54811	0.0399796	13.9239	0.0838204	27.596	-0.0893429	30.1082	0.029384	39.8635
		0.007952	9.22282	0.0400082	14.6203	0.0838163	27.1659	-0.0892531	29.8631	0.029392	39.8816
		0.008	8.51818	0.0400204	14.689	0.0837469	26.9736	-0.0891633	29.6569	0.029432	39.8985
		0.008088	7.60238	0.0400408	14.2232	0.083751	27.1857	-0.0890776	29.3153	0.029496	39.9179
		0.008176	6.80597	0.040049	14.134	0.0837102	26.2237	-0.0889633	28.8832	0.029544	39.9348
		0.008272	6.31526	0.0400612	14.5463	0.0836408	26.6823	-0.0888898	28.6024	0.029576	39.949
		0.00832	6.23904	0.0400449	14.7385	0.0836408	26.6968	-0.0888082	28.2675	0.029576	39.962
		0.008304	6.50294	0.0400367	14.6401	0.0835265	26.0903	-0.088698	27.8677	0.029584	39.9788
		0.008256	6.98328	0.0400245	14.43	0.0835551	27.0007	-0.0885878	27.505	0.029576	39.9905
		0.008224	7.4148	0.0400327	14.8278	0.083551	26.7232	-0.088502	27.2679	0.029576	40.0047
		0.008184	7.5755	0.0400408	15.4475	0.0834816	26.6135	-0.0884122	26.9876	0.029616	40.0099
		0.008168	7.48738	0.0400612	15.4932	0.0835102	27.0634	-0.0883102	26.6718	0.029624	40.0138
		0.008168	7.20614	0.0400857	15.1041	0.0834776	26.5983	-0.0882531	26.5245	0.02972	40.0138
		0.008232	6.72566	0.040098	15.1682	0.0834449	26.9663	-0.0881796	26.3487	0.02976	40.019
		0.008264	6.16627	0.0401102	15.7113	0.0834735	27.0416	-0.0880898	26.14	0.029744	40.0151
		0.008352	5.66251	0.0401143	15.885	0.0834327	26.7363	-0.0880245	26.0455	0.029752	40.0203
		0.008424	5.17008	0.0401102	15.6082	0.0834449	27.2352	-0.0879755	25.8663	0.029768	40.0216
		0.00848	4.79467	0.040102	15.4264	0.0834327	26.8104	-0.087902	25.6774	0.0298	40.0203
		0.008496	4.69234	0.0401347	15.6259	0.0833878	26.9095	-0.0879102	25.9192	0.029808	40.0177
		0.008496	4.73486	0.0401469	15.9522	0.0834082	27.2682	-0.0879143	25.8875	0.0298	40.0177
		0.008512	4.77346	0.040151	15.9608	0.0833633	26.5289	-0.0878898	25.8194	0.02976	40.0099
		0.008512	4.6896	0.0401551	15.7019	0.0833265	27.2074	-0.0878776	25.8908	0.029768	40.0125
		0.008512	4.47365	0.0401592	15.7786	0.0833878	27.2965	-0.0878449	25.6973	0.0298	40.0125
		0.008576	4.18757	0.0401469	16.0759	0.0832857	26.55	-0.0877878	25.5308	0.029832	40.0112
		0.008632	3.94781	0.0401347	16.2602	0.0832816	27.4479	-0.0877592	25.5116	0.029888	40.0177
		0.008664	3.73915	0.0401306	15.885	0.083302	27.1816	-0.0877347	25.402	0.029912	40.0281
		0.00868	3.5603	0.0401306	15.6986	0.0832367	26.9775	-0.0877224	25.3353	0.029904	40.0475
		0.008704	3.3983	0.0401184	16.0481	0.0832898	27.6778	-0.0877551	25.5903	0.029904	40.0592
		0.00872	3.24667	0.0401061	16.7135	0.0832898	27.2431	-0.0877551	25.4053	0.029888	40.0786
		0.008728	3.18965	0.0400939	16.5568	0.0832939	27.5271	-0.087751	25.4007	0.029936	40.098
		0.008704	3.22464	0.0400776	16.2113	0.0833306	27.658	-0.0877796	25.6908	0.03	40.1149
		0.008736	3.23246	0.0400735	16.4082	0.0833224	27.4426	-0.0877837	25.7819	0.030096	40.1292
		0.008784	3.0852	0.0400816	17.0901	0.0833347	27.8602	-0.0877918	25.8809	0.030096	40.1486
		0.00884	2.88221	0.0400939	17.1	0.0833592	27.6363	-0.0878041	26.1294	0.030096	40.1641
		0.008888	2.7191	0.040102	16.6164	0.0833306	27.7347	-0.0878857	26.471	0.030128	40.1823
		0.008952	2.59339	0.0401306	16.5351	0.0833469	27.9719	-0.0879551	26.6534	0.030128	40.203
		0.009024	2.53507	0.0401469	16.8556	0.0833224	27.7948	-0.0880612	27.1615	0.030144	40.2147
		0.008984	2.58043	0.0401837	17.0029	0.0833143	28.0122	-0.0881592	27.3875	0.030184	40.2315
		0.00896	2.70614	0.0402163	16.7796	0.0833551	27.8675	-0.0882776	27.8261	0.030208	40.2562
		0.008952	2.82149	0.0402612	16.4393	0.0833143	27.561	-0.0883224	27.9622	0.030216	40.2769
		0.008912	2.97662	0.0402857	16.4036	0.0833796	28.1232	-0.0883755	28.216	0.030216	40.295
		0.008816	3.25219	0.0403184	16.4749	0.0833633	27.2934	-0.0884612	28.5489	0.030248	40.3067
		0.008696	3.57715	0.0403184	16.2959	0.0833429	27.6145	-0.0885469	28.7914	0.030296	40.3261
		0.0086	3.71971	0.0403347	15.6623	0.0833347	27.7605	-0.0886	28.8132	0.030288	40.3404
		0.008576	3.68731	0.0403429	15.4482	0.0833061	27.5927	-0.0886735	29.1296	0.03032	40.3585
		0.008552	3.6251	0.0403592	15.7581	0.083298	27.5629	-0.0887673	29.3918	0.0304	40.3741
		0.00856	3.60178	0.0403755	15.9226	0.0832571	27.4559	-0.0888122	29.5048	0.030448	40.3935
		0.008592	3.61733	0.0403959	15.4786	0.0832571	27.4275	-0.088849	29.5809	0.030448	40.4117
		0.008584	3.64714	0.0403918	15.0723	0.0833224	27.4242	-0.0889143	29.7263	0.030456	40.4389
		0.008552	3.69898	0.0404041	15.1562	0.0833551	27.3792	-0.0889633	29.9384	0.030496	40.4557
		0.008536	3.79747	0.0404041	15.6042	0.0833837	27.5121	-0.0889796	29.844	0.030544	40.4752
		0.008496	3.97114	0.0404041	15.1027	0.0834327	27.4215	-0.0889796	29.7753	0.030592	40.4972
		0.008448	4.33118	0.0404041	14.2385	0.0834327	27.4268	-0.0890245	30.0574	0.0306	40.5102
		0.008376	4.89835	0.0404204	14.3937	0.0834327	27.37	-0.0890612	30.2299	0.030624	40.5296
		0.008208	5.65968	0.0404327	15.2612	0.0833469	26.7886	-0.089049	30.0158	0.030592	40.5504
		0.008032	6.48994	0.0404531	14.878	0.0833592	27.1479	-0.0890531	30.0726	0.030608	40.5698
		0.00792	7.19318	0.0404612	14.1189	0.0833429	26.6901	-0.0890694	30.0183	0.030608	40.5828
		0.007856	7.5768	0.0404735	14.2319	0.0832449	26.5401	-0.0890653	29.9899	0.030648	40.6022
		0.007816	7.64808	0.0405061	14.8608	0.0832653	27.0911	-0.0890408	29.8637	0.030656	40.6281
		0.007816	7.58976	0.0405061	14.6223	0.0832367	26.6102	-0.089049	29.976	0.030656	40.6398
		0.007824	7.51978	0.0405306	14.0231	0.0832204	27.1268	-0.0891143	30.2171	0.030656	40.6527
		0.0078	7.56125	0.0405388	13.9967	0.0832653	27.1116	-0.0891265	30.235	0.030696	40.6722
		0.007768	7.80072	0.040551	14.662	0.0832327	26.2732	-0.0891184	30.1068	0.030736	40.6968
		0.007808	8.16571	0.0405469	14.7485	0.0832816	27.025	-0.0891265	30.1624	0.030768	40.7136
		0.007864	8.43101	0.0405551	14.1592	0.0833265	26.5315	-0.0891347	30.0671	0.030784	40.7279
		0.007864	8.48798	0.0405184	13.9563	0.0832327	26.328	-0.0890816	29.7488	0.030792	40.7512
		0.007816	8.42318	0.0405347	14.4723	0.0832898	26.9464	-0.0890449	29.5466	0.030808	40.7772
		0.007784	8.53853	0.0405388	14.6896	0.0832857	26.4806	-0.0889837	29.2399	0.030824	40.7901
		0.007816	8.85475	0.0405469	14.0851	0.0832612	26.5375	-0.088898	28.8343	0.030864	40.8005
		0.00788	9.12562	0.0405429	13.805	0.0833429	26.7786	-0.0887959	28.4644	0.030888	40.8251
		0.007904	9.10488	0.0406082	14.3032	0.0833306	26.1014	-0.0886694	28.1558	0.030912	40.8497
		0.007936	8.9675	0.0406653	14.8661	0.0833755	26.7727	-0.0885673	27.8638	0.030936	40.8677
		0.00796	8.89752	0.0407306	14.5946	0.0834122	26.6333	-0.0884939	27.6716	0.030928	40.878
		0.007968	8.85864	0.0408041	14.2603	0.0833918	26.5778	-0.0884367	27.4667	0.030944	40.8859
		0.007944	8.84179	0.0408612	14.471	0.0834327	27.1565	-0.0883959	27.4383	0.030952	40.91
		0.007912	8.86253	0.0408939	14.991	0.0834327	26.6868	-0.0883673	27.2017	0.030944	40.9266
		0.007896	9.05952	0.040902	15.0783	0.0834041	26.9663	-0.088302	27.0181	0.030928	40.9432
		0.007928	9.24355	0.040902	14.9785	0.0835102	27.4255	-0.0882857	27.0816	0.030952	40.9548
		0.007984	9.25262	0.0409102	15.0129	0.083449	26.6975	-0.0882694	27.1384	0.030992	40.9729
		0.007992	9.09581	0.0409102	15.5124	0.0834735	27.4454	-0.0882204	26.822	0.031032	40.9976
		0.008024	8.9999	0.0409102	15.7872	0.0835102	27.4143	-0.0881918	26.7672	0.031104	41.0261
		0.008024	8.95714	0.040898	15.5665	0.0834898	27.3812	-0.0882245	26.9852	0.031152	41.0481
		0.008024	8.90141	0.0408898	15.2303	0.0835306	28.0234	-0.0882122	26.781	0.031168	41.0663
		0.008	8.8392	0.0408735	15.5375	0.0835551	27.4955	-0.0881551	26.5405	0.03116	41.0883
		0.008	8.7433	0.0408694	16.0561	0.0835388	27.6944	-0.0881469	26.6448	0.031192	41.0961
		0.00804	8.45587	0.0408531	16.0819	0.0836735	28.3623	-0.0881388	26.6415	0.031216	41.1168
		0.008088	7.91981	0.0408612	15.5804	0.0836327	27.2525	-0.0881184	26.5496	0.031224	41.1375
		0.008184	7.35518	0.0408694	15.6312	0.0836245	27.7995	-0.0880816	26.4664	0.031224	41.1596
		0.008288	6.98842	0.0408939	16.2582	0.0837224	28.3327	-0.0881265	26.7168	0.031216	41.1712
		0.008336	6.82771	0.0409061	16.354	0.0836776	27.2664	-0.088151	26.7855	0.031232	41.1881
		0.008352	6.81475	0.0408857	15.8665	0.0837102	28.077	-0.0881796	26.9157	0.031272	41.2075
		0.008352	6.75514	0.0408939	15.6828	0.0838286	28.0678	-0.0882327	27.174	0.03132	41.2244
		0.008408	6.4692	0.0408857	16.2094	0.0838163	27.5141	-0.0882776	27.3893	0.03132	41.2386
		0.008488	6.01867	0.0408776	16.463	0.0839102	28.4437	-0.0883265	27.5855	0.031328	41.2542
		0.00852	5.61067	0.0408612	16.0627	0.0839837	28.2567	-0.0884571	28.1373	0.031344	41.2723
		0.008544	5.31907	0.040849	15.5697	0.0839143	28.2104	-0.0885755	28.539	0.031376	41.2892
		0.008584	5.13763	0.0408327	15.8148	0.0839796	29.3785	-0.0886327	28.6507	0.031408	41.306
		0.008608	5.07283	0.0408571	16.235	0.0840245	28.6299	-0.0887878	29.2394	0.03144	41.3216
		0.008592	5.09098	0.0408694	15.9879	0.0839673	28.5156	-0.0888939	29.5631	0.031504	41.3449
		0.008576	5.07672	0.0408776	15.2843	0.0840735	29.0792	-0.0889551	29.6932	0.031568	41.3656
		0.00864	4.91621	0.0409143	15.2857	0.0840571	27.9858	-0.089	29.9271	0.031664	41.3916
		0.008736	4.66267	0.0409347	15.84	0.0840163	28.2784	-0.0891184	30.3135	0.03172	41.4071
		0.008752	4.47912	0.0409102	15.6578	0.0840776	28.9536	-0.0891673	30.4424	0.031712	41.424
		0.008728	4.45195	0.0409061	14.7698	0.0840245	27.9771	-0.089249	30.5938	0.031712	41.4447
		0.008736	4.51286	0.040902	14.6093	0.0839755	28.8882	-0.0893551	30.8858	0.031712	41.4628
		0.008792	4.49861	0.040902	15.3089	0.0840531	29.1161	-0.0894408	31.0081	0.031728	41.4823
		0.00884	4.39363	0.0408898	15.2368	0.0839551	28.1047	-0.0894816	31.0108	0.031728	41.5043
		0.008848	4.33661	0.0408776	14.3065	0.0839265	28.9305	-0.0895469	31.2235	0.031736	41.5134
		0.0088	4.40789	0.0408449	14.0151	0.0840082	29.1201	-0.0895796	31.3529	0.031736	41.5315
		0.008784	4.50768	0.0408245	14.6216	0.0838898	27.882	-0.0895918	31.3946	0.03176	41.551
		0.008792	4.63166	0.0408245	14.6758	0.0838898	28.9305	-0.0896327	31.6185	0.031768	41.5795
		0.00872	4.91112	0.0408082	13.9556	0.0840163	29.0045	-0.089702	31.8531	0.031792	41.5976
		0.008584	5.3424	0.0407837	13.6735	0.0839224	27.7063	-0.089698	31.6265	0.031832	41.6106
		0.008504	5.85427	0.0407918	13.8176	0.0838735	28.5969	-0.0896653	31.3186	0.031864	41.6222
		0.008368	6.33202	0.0408122	13.961	0.0839673	28.6854	-0.0896653	31.3021	0.031896	41.6404
		0.008272	6.76829	0.0407878	13.8157	0.0838449	27.4466	-0.0896857	31.2915	0.031904	41.6598
		0.008208	7.12838	0.0407918	13.7385	0.0838245	28.1628	-0.0896367	31.0946	0.03188	41.6793
		0.008176	7.36166	0.0407796	13.6314	0.0838735	27.997	-0.0896776	31.4574	0.031912	41.7
		0.00816	7.4148	0.0407633	13.8078	0.0838286	27.5345	-0.0897388	31.6623	0.031984	41.7168
		0.008144	7.35907	0.0407755	13.8692	0.0838776	27.8516	-0.0896939	31.3008	0.032032	41.7428
		0.008144	7.33056	0.0407796	13.1978	0.0838694	27.5226	-0.0896449	31.1701	0.03208	41.7583
		0.00812	7.41739	0.0407796	12.8808	0.0837959	27.5451	-0.0896408	31.1165	0.032072	41.7752
		0.008088	7.65586	0.0407959	13.2289	0.0838163	27.9646	-0.0895592	30.644	0.032088	41.792
		0.008064	8.02474	0.0408122	13.6862	0.0837469	26.893	-0.0895184	30.5482	0.032128	41.8153
		0.008032	8.32622	0.0408041	13.3493	0.0836612	27.5418	-0.0895265	30.6421	0.03216	41.8413
		0.007992	8.46725	0.0407878	13.0136	0.0837388	27.5735	-0.0894694	30.3553	0.032184	41.8633
		0.007992	8.55278	0.0408122	13.0592	0.0836694	26.7959	-0.0894122	30.1452	0.032192	41.8737
		0.008024	8.82494	0.0408367	13.6148	0.0836939	27.4255	-0.0893673	30.1346	0.032208	41.8918
		0.00804	9.28368	0.0408367	13.552	0.083702	27.3601	-0.0893143	29.8908	0.032232	41.9061
		0.008024	9.6876	0.0408245	12.9719	0.0837388	27.3799	-0.0892245	29.6159	0.032272	41.9229
		0.008024	9.99168	0.0408531	12.929	0.0837265	27.5609	-0.0891755	29.4686	0.032304	41.9372
		0.008064	10.0822	0.0408653	13.521	0.0837347	27.6098	-0.0890898	29.1191	0.032328	41.9592
		0.008072	9.97982	0.0408735	13.8381	0.0837184	27.6752	-0.0889673	28.7056	0.032344	41.9812
		0.008072	9.82574	0.0408939	13.7865	0.0837429	27.7789	-0.0888857	28.4855	0.03236	41.9942
		0.008072	9.85685	0.0409265	13.8288	0.083751	27.8622	-0.0887837	28.0778	0.032376	42.0084
		0.008048	10.1224	0.0409469	14.1974	0.0838163	28.2296	-0.0886694	27.7243	0.032376	42.0279
		0.008056	10.4619	0.0409551	14.6315	0.0838041	27.7076	-0.0885837	27.6939	0.032368	42.0486
		0.008096	10.6019	0.0409469	14.683	0.0838041	28.3545	-0.0885224	27.456	0.032384	42.0603
		0.008144	10.5228	0.0409224	14.6659	0.0838857	28.6028	-0.0884204	27.0788	0.032392	42.0797
		0.008152	10.5176	0.0409143	14.8305	0.0838	27.5874	-0.0883714	27.0683	0.0324	42.0979
		0.008136	10.7833	0.0409143	14.8966	0.0838204	28.5123	-0.0883469	27.0042	0.03244	42.1225
		0.008136	11.1216	0.0409265	14.9145	0.0838816	28.2606	-0.0882776	26.6098	0.03248	42.1419
		0.00816	11.2045	0.0409388	14.9561	0.0839224	28.3002	-0.0882286	26.5748	0.032544	42.1549
		0.008184	11.0295	0.0409633	14.7249	0.0840041	29.1082	-0.0881796	26.512	0.032544	42.1756
		0.008192	10.7405	0.0409878	14.7678	0.0840735	28.7257	-0.0881388	26.3614	0.032552	42.1977
		0.0082	10.5384	0.0409918	15.4952	0.084049	28.5084	-0.0881184	26.3316	0.0326	42.2158
		0.008224	10.4787	0.0409959	15.6703	0.0841633	29.8125	-0.088098	26.3957	0.032624	42.2391
		0.008248	10.528	0.041	15.108	0.0841633	28.7799	-0.0881102	26.4737	0.032664	42.2612
		0.008232	10.6174	0.0410082	14.958	0.0841061	28.5843	-0.0881184	26.5061	0.032656	42.2806
		0.008208	10.9322	0.0410163	15.4825	0.0842327	29.9948	-0.0880939	26.4875	0.03268	42.2949
		0.008184	11.3127	0.0410204	15.7719	0.0843061	29.0554	-0.0881102	26.666	0.032688	42.3117
		0.008224	11.4241	0.0410082	15.4217	0.0843102	28.7568	-0.0881265	26.6389	0.03272	42.3234
		0.008248	11.1796	0.0410122	15.1225	0.084449	29.2397	-0.0880531	26.4096	0.032768	42.3454
		0.008288	10.852	0.0410286	15.569	0.0845061	28.3887	-0.088049	26.4618	0.032792	42.3674
		0.008336	10.48	0.0410449	16.1227	0.0845224	28.5123	-0.0880898	26.6309	0.032792	42.3869
		0.008392	9.96077	0.0410776	15.5922	0.0846122	29.0706	-0.0880571	26.4709	0.0328	42.4089
		0.008448	9.48432	0.0410898	14.878	0.0845592	28.6081	-0.0880776	26.7471	0.032792	42.427
		0.008456	9.23707	0.0410816	15.2025	0.0845673	29.5754	-0.0881837	27.2426	0.032784	42.4412
		0.00848	9.18005	0.0410898	15.7773	0.0846571	29.7637	-0.0882408	27.3906	0.0328	42.4553
		0.008544	9.14894	0.0410816	15.6016	0.0846	28.7825	-0.0882653	27.6258	0.032848	42.4759
		0.00856	8.99083	0.0410531	15.188	0.0846612	29.6441	-0.0883592	28.0884	0.03292	42.4874
		0.008568	8.5763	0.0410612	15.1992	0.0847429	28.7548	-0.0883959	28.1473	0.032976	42.5028
		0.008632	7.98581	0.0410653	15.5362	0.0847265	28.5659	-0.0884694	28.3991	0.032968	42.5246
		0.008704	7.47826	0.0410653	15.3782	0.0848245	29.2728	-0.0885878	28.7783	0.032976	42.5555
		0.00876	7.03507	0.0410735	14.664	0.0848653	28.7364	-0.0886327	28.8656	0.032984	42.5736
		0.008832	6.67608	0.0410694	14.3733	0.0848571	28.85	-0.0887184	29.1047	0.032992	42.5879
		0.008856	6.4237	0.0410612	14.7313	0.0848857	28.9227	-0.0888327	29.4502	0.033008	42.6047
		0.008896	6.19997	0.0410776	14.8364	0.0848286	28.1199	-0.0888694	29.5856	0.033016	42.6216
		0.008896	5.99947	0.0410735	14.4188	0.0847837	28.6768	-0.0889224	29.8286	0.033072	42.6462
		0.008848	5.9593	0.0410653	13.9841	0.0848204	28.5295	-0.0890082	30.1207	0.033104	42.6682
		0.008848	5.93338	0.0410694	14.3072	0.0847551	28.3564	-0.0890694	30.2158	0.033112	42.6812
		0.008904	5.7312	0.0410653	14.7148	0.0848408	29.0806	-0.0891265	30.4345	0.03308	42.7071
		0.009	5.40202	0.0410776	14.4175	0.0848163	28.5686	-0.0892	30.6031	0.03312	42.7265
		0.009048	5.15448	0.0410776	13.741	0.0847714	28.5811	-0.0892571	30.6546	0.033176	42.7356
		0.009032	5.10394	0.0410694	13.7588	0.0848204	28.9709	-0.0893224	30.7385	0.033144	42.7486
		0.009	5.18299	0.0410857	14.148	0.0847184	28.1504	-0.0893469	30.755	0.033144	42.7615
		0.008992	5.30222	0.0410939	13.9908	0.0847143	28.8083	-0.0893837	30.8118	0.033168	42.7745
		0.008984	5.42794	0.0410694	13.2997	0.0847755	28.6346	-0.0893837	30.7074	0.033224	42.7952
		0.00892	5.70528	0.0410449	13.1716	0.0846327	27.8365	-0.0893918	30.7035	0.033264	42.8224
		0.008864	6.1248	0.0410327	13.2648	0.0846776	28.8076	-0.0893673	30.4966	0.03328	42.8406
		0.008792	6.38227	0.0410163	13.3295	0.0847347	28.2646	-0.0893224	30.3394	0.03328	42.8574
		0.00876	6.37594	0.0410122	13.0308	0.0846041	27.8906	-0.0892653	30.0791	0.033312	42.8743
		0.008736	6.25459	0.0410122	12.8002	0.0846122	28.5103	-0.089249	30.0131	0.033328	42.8989
		0.008752	6.11741	0.0410204	12.7751	0.0845837	27.8827	-0.0891796	29.8022	0.033336	42.9222
		0.008848	5.81155	0.0410327	13.2461	0.0844816	27.9871	-0.0891143	29.5565	0.033376	42.9443
		0.00892	5.40331	0.0410327	13.2435	0.084502	28.3022	-0.0890735	29.3701	0.0334	42.9637
		0.00896	5.06246	0.0410245	13.0136	0.0844776	27.8015	-0.089	29.0088	0.033384	42.9844
		0.008976	4.9549	0.0410245	12.9812	0.0845143	28.2897	-0.0888816	28.4663	0.033432	43.0039
		0.008968	5.04302	0.0410245	13.194	0.0845388	27.9957	-0.0887959	28.1935	0.033456	43.0181
		0.008912	5.33722	0.0410245	13.4484	0.0844857	27.5974	-0.088751	28.0706	0.03344	43.0376
		0.008856	5.7959	0.0410245	13.3994	0.0844776	28.036	-0.0886367	27.61	0.0334	43.0648
		0.008792	6.34882	0.0410245	13.3538	0.0844204	27.3403	-0.0885347	27.3022	0.033456	43.0868
		0.008672	6.86026	0.0410286	13.6484	0.084351	27.7037	-0.0884612	27.067	0.033472	43.105
		0.00856	7.33834	0.0410327	14.4121	0.0843918	28.0116	-0.0884	26.8694	0.033472	43.1218
		0.008456	7.76842	0.0410367	14.5204	0.0843469	27.6878	-0.088302	26.5219	0.033488	43.1374
		0.008408	8.12563	0.0410286	14.1689	0.0843673	28.0149	-0.0882245	26.3171	0.033504	43.1581
		0.008336	8.47248	0.0410286	14.1399	0.0843959	27.894	-0.0881429	26.1029	0.033496	43.1801
		0.008312	8.63962	0.0410327	14.7504	0.0843429	27.7963	-0.0880449	25.8689	0.033496	43.1918
		0.008312	8.65776	0.041049	15.0841	0.0843551	28.3149	-0.0879347	25.5174	0.033512	43.1996
		0.008304	8.68886	0.0410571	14.8853	0.0842857	27.5604	-0.0878735	25.3839	0.033552	43.2177
		0.008264	8.95454	0.0410612	14.6819	0.0842449	28.2032	-0.0878245	25.22	0.033576	43.2423
		0.0082	9.24226	0.0410571	15.0637	0.0843061	28.4919	-0.0878041	25.203	0.033592	43.2553
		0.008216	9.37704	0.0410571	15.5792	0.0842857	28.0459	-0.0878286	25.4448	0.033608	43.2708
		0.008208	9.42629	0.0410408	15.5765	0.0843102	28.9034	-0.0878286	25.3762	0.033648	43.289
		0.00824	9.66298	0.0410204	15.1246	0.0844367	28.8684	-0.0878122	25.2429	0.033648	43.3123
		0.008272	10.0215	0.0410245	15.1992	0.0843878	28.0657	-0.0878204	25.4318	0.033664	43.3305
		0.008312	10.182	0.0410327	15.8685	0.0844531	29.2939	-0.0878327	25.6089	0.033664	43.3499
		0.008312	10.1133	0.0410531	16.0276	0.0844816	28.4899	-0.0878082	25.404	0.033664	43.3629
		0.008272	9.94478	0.0410653	15.4793	0.0844245	28.1833	-0.0877837	25.334	0.033696	43.3849
		0.008248	9.86314	0.041102	15.4211	0.0844735	29.3395	-0.0878	25.5645	0.033696	43.4004
		0.008256	9.86573	0.0411224	16.1624	0.0845265	28.8162	-0.0877918	25.5857	0.033672	43.4212
		0.008264	9.99144	0.0411551	16.4484	0.0844857	28.5427	-0.0877837	25.3966	0.033704	43.4445
		0.00832	10.296	0.0411918	16.0164	0.0845959	29.3804	-0.0877878	25.4839	0.033744	43.4614
		0.008288	10.5811	0.0412245	15.7507	0.0845837	28.3723	-0.0878245	25.8327	0.033784	43.486
		0.008304	10.6122	0.0412408	16.2158	0.0845714	28.6584	-0.0878122	25.8314	0.033784	43.5041
		0.008296	10.4554	0.0412653	16.5607	0.0846735	29.3355	-0.0878735	26.1089	0.033816	43.5184
		0.008336	10.3465	0.0412816	16.3038	0.0846204	28.47	-0.0879429	26.5186	0.033848	43.5352
		0.008352	10.2688	0.0412694	15.7785	0.0846286	29.1221	-0.0880082	26.7201	0.033848	43.5573
		0.008368	10.2053	0.0412612	15.7858	0.0847429	29.2589	-0.0880776	26.9685	0.03388	43.5806
		0.00836	10.1172	0.0412776	15.9952	0.0846694	28.3946	-0.0881755	27.3028	0.033928	43.5948
		0.008352	10.0588	0.0412857	16.0388	0.0847102	29.0718	-0.0882286	27.5393	0.033976	43.6104
		0.008304	10.0446	0.0412857	16.0091	0.0847755	28.6622	-0.0882898	27.7244	0.034008	43.635
		0.008296	10.0005	0.0413143	15.9477	0.0846857	28.2466	-0.0883714	28.1758	0.034056	43.6532
		0.008256	9.90202	0.0413592	15.984	0.0847388	29.2812	-0.0884571	28.4268	0.034112	43.6635
		0.00828	9.78581	0.0413878	16.0527	0.0847633	28.5492	-0.0885469	28.7307	0.03412	43.6856
		0.008344	9.57763	0.0414245	15.8103	0.0847265	28.6253	-0.0886571	29.0438	0.034128	43.705
		0.008352	9.15802	0.041449	15.3042	0.0847796	28.8624	-0.0887592	29.3075	0.034144	43.7244
		0.008384	8.60477	0.0414735	15.2045	0.0847755	28.4945	-0.0888245	29.3708	0.034152	43.7413
		0.008496	8.05834	0.0414816	15.6372	0.0847837	28.3445	-0.088898	29.6219	0.034168	43.7607
		0.008608	7.6415	0.0414939	15.6664	0.0847878	28.1179	-0.0889469	29.7547	0.034184	43.7776
		0.008656	7.4148	0.041502	15.0176	0.0847102	27.4705	-0.0889837	29.797	0.034184	43.797
		0.008672	7.19837	0.0415143	14.5716	0.0847592	28.2547	-0.0890163	29.9542	0.034184	43.8113
		0.00872	6.85238	0.0415306	14.8629	0.0847469	27.2221	-0.0891061	30.2278	0.034192	43.8372
		0.008776	6.43685	0.0415429	15.182	0.0846939	27.2783	-0.0891388	30.2297	0.0342	43.8579
		0.008824	6.0576	0.0415469	14.9785	0.0847755	27.6892	-0.0891673	30.2396	0.034224	43.8748
		0.008832	5.77267	0.0415469	14.771	0.0847265	26.9241	-0.0892286	30.4081	0.03428	43.8929
		0.008864	5.62363	0.0415592	14.8332	0.0846776	27.1818	-0.0893224	30.6003	0.034328	43.9163
		0.008848	5.60678	0.0415551	14.9726	0.084702	27.3	-0.0893388	30.6149	0.034384	43.9279
		0.008848	5.64696	0.041551	14.8437	0.0845918	26.6928	-0.0894082	30.7834	0.034408	43.9409
		0.008856	5.53939	0.0415551	14.1936	0.0846122	27.36	-0.0894612	30.8977	0.034408	43.9642
		0.008864	5.26205	0.0415714	13.8823	0.084649	27.033	-0.0894735	30.9242	0.034432	43.9836
		0.008904	4.93171	0.0415796	13.9755	0.0845837	26.7998	-0.0894653	30.7756	0.03444	43.9966
		0.008944	4.69114	0.0415878	14.2252	0.0846204	27.3251	-0.0894653	30.6943	0.034424	44.0199
		0.00896	4.49198	0.0416163	14.167	0.0846041	26.6809	-0.0894694	30.7359	0.034432	44.0406
		0.00896	4.32365	0.0416367	14.0276	0.0845469	27.0172	-0.0894204	30.5047	0.034456	44.0691
		0.009008	4.24848	0.0416367	14.1882	0.0845878	27.177	-0.0893469	30.2225	0.03448	44.0884
		0.008984	4.27181	0.041649	14.8482	0.0845224	26.3076	-0.0892816	30.0726	0.03448	44.1077
		0.008976	4.27829	0.0416571	14.8905	0.0845347	27.1665	-0.0892163	29.8289	0.03452	44.1178
		0.009008	4.11629	0.041649	14.3428	0.0846	27.1406	-0.0891143	29.4232	0.034552	44.1344
		0.009016	3.89078	0.0416327	14.2589	0.0845224	26.3597	-0.0890449	29.2123	0.0346	44.1588
		0.009008	3.74174	0.0416286	14.7531	0.0845796	27.3996	-0.0890082	29.0644	0.034616	44.1794
		0.008968	3.72101	0.0416245	15.0287	0.0845796	26.9213	-0.0889551	28.7485	0.034632	44.1989
		0.00896	3.77414	0.0416204	15.0485	0.0844939	26.7528	-0.0888816	28.5489	0.03464	44.217
		0.008936	3.84672	0.0416163	15.0604	0.0845224	27.2688	-0.0888204	28.4286	0.03468	44.2287
		0.008952	3.91022	0.0416204	15.0519	0.0844939	26.768	-0.0887469	28.2332	0.034688	44.2481
		0.008976	3.94003	0.0416163	14.9191	0.0844245	27.0481	-0.0886531	27.9154	0.034696	44.2676
		0.009016	3.9193	0.0416286	14.8827	0.0844694	27.2311	-0.0885837	27.8169	0.034728	44.2883
		0.009032	3.81173	0.0416327	15.0948	0.0844082	26.6676	-0.0885102	27.5335	0.034792	44.3052
		0.009072	3.60696	0.041649	15.3862	0.0844327	27.3289	-0.088449	27.2737	0.034912	44.3233
		0.009096	3.42422	0.0416612	15.5442	0.0844449	27.2213	-0.0884327	27.1276	0.034952	44.3414
		0.009112	3.42682	0.0416776	15.9069	0.0844286	27.2787	-0.0884122	27.0543	0.035	44.357
		0.009112	3.5603	0.0416857	16.0647	0.0844816	27.8661	-0.0883878	27.0067	0.034992	44.3751
		0.009088	3.84931	0.0416735	15.5401	0.0844816	27.3977	-0.0883633	26.899	0.034984	44.3946
		0.009008	4.2419	0.0416612	15.3491	0.0844612	27.8093	-0.0883347	26.8093	0.035048	44.4192
		0.008912	4.6717	0.041649	16.3137	0.084551	27.9626	-0.0882898	26.7268	0.035064	44.4412
		0.008784	5.04965	0.0416367	16.5991	0.0845184	27.4552	-0.0882776	26.7228	0.035032	44.4581
		0.008632	5.42405	0.0416327	15.6722	0.0845551	28.1298	-0.0882571	26.555	0.035024	44.4775
		0.00852	5.70787	0.0416367	15.5876	0.0846286	27.8708	-0.0882776	26.7446	0.03508	44.4983
		0.008456	5.96443	0.0416327	16.7928	0.0845673	27.4533	-0.0882816	26.8284	0.035152	44.5151
		0.008408	6.28536	0.0416367	16.9401	0.0846082	28.4602	-0.0883224	27.0306	0.035192	44.532
		0.008344	6.71515	0.0416327	16.1757	0.0846	27.6535	-0.0883224	27.1456	0.035208	44.5566
		0.008264	7.05451	0.0416286	16.2484	0.0845224	27.713	-0.0883633	27.4614	0.035192	44.5799
		0.008232	7.1867	0.0416571	16.9699	0.0845673	28.7781	-0.0884	27.6232	0.0352	44.5903
		0.008232	7.20614	0.0416776	16.9685	0.0845184	27.9205	-0.0884776	28.0574	0.0352	44.6032
		0.008248	7.33056	0.0416898	16.2351	0.0844612	28.2304	-0.0885429	28.2073	0.035224	44.6214
		0.008232	7.62605	0.0417184	16.2233	0.0845143	28.7622	-0.0886408	28.5595	0.035256	44.6447
		0.008256	7.95874	0.0417388	17.135	0.0844735	27.8557	-0.0887469	28.944	0.035288	44.6667
		0.008272	8.24467	0.0417306	17.2321	0.0844327	28.3472	-0.0888327	29.1984	0.035344	44.6849
		0.00828	8.36098	0.0417306	16.3388	0.0845265	28.6881	-0.0889061	29.3629	0.035368	44.7082
		0.008256	8.31821	0.0417224	16.1221	0.0844612	27.7988	-0.0890163	29.8506	0.03544	44.7315
		0.008232	8.24174	0.0417224	16.4518	0.0845061	28.6709	-0.0890816	29.9469	0.035472	44.7406
		0.008232	8.22101	0.0417306	16.4783	0.0845837	28.4212	-0.0891224	30.0487	0.03552	44.7588
		0.00824	8.2236	0.0417347	16.6039	0.0845755	28.0321	-0.0892327	30.422	0.035536	44.7782
		0.008224	8.26766	0.0417469	17.1847	0.0846408	28.3869	-0.0893143	30.5713	0.035552	44.8015
		0.008184	8.49058	0.041751	17.2276	0.0846653	27.7857	-0.0893755	30.7886	0.0356	44.8261
		0.0082	8.83402	0.0417184	16.5794	0.0846204	27.8293	-0.0894653	31.0338	0.035624	44.8417
		0.008224	9.04267	0.0417347	15.8454	0.084649	28.0684	-0.0895592	31.2453	0.03564	44.8585
		0.008264	8.99861	0.0417878	15.7092	0.0845878	27.1977	-0.0896082	31.4006	0.035688	44.8728
		0.008256	8.78736	0.0418408	16.0401	0.0845592	27.8386	-0.0896571	31.5327	0.035744	44.8909
		0.008296	8.6124	0.0418939	16.3533	0.0845959	27.7962	-0.0897061	31.608	0.035744	44.9078
		0.008296	8.5476	0.0419592	16.1757	0.0845061	26.9737	-0.0897224	31.6167	0.035768	44.9259
		0.008296	8.59944	0.0419918	15.92	0.0845347	27.8372	-0.0896939	31.4211	0.035792	44.9402
		0.00832	8.68627	0.0419837	15.8129	0.0845306	27.3311	-0.0896939	31.4072	0.035776	44.9635
		0.008328	9.0024	0.0420082	15.3828	0.0844327	27.0556	-0.0896939	31.4158	0.035784	44.9856
		0.008296	9.69139	0.042	14.8761	0.0844612	27.6694	-0.0897143	31.4542	0.0358	44.9998
		0.008328	10.5035	0.0420163	15.1027	0.0844449	27.047	-0.0897429	31.6014	0.035824	45.0167
		0.008416	11.1045	0.0420449	15.5566	0.0843633	27.3145	-0.0898041	31.9066	0.035856	45.0361
		0.00844	11.5317	0.0420694	15.4305	0.0844204	27.6891	-0.0898367	31.8649	0.035888	45.0529
		0.008408	11.8928	0.0420857	15.2574	0.0843837	26.9459	-0.0898245	31.6899	0.035936	45.0698
		0.008416	12.1662	0.0421102	15.2098	0.0843878	27.44	-0.0897755	31.4698	0.035976	45.0892
		0.008448	12.3503	0.0421143	15.3875	0.0844327	27.1797	-0.0897837	31.5128	0.036	45.1061
		0.008488	12.4358	0.042102	15.3789	0.0844	26.7272	-0.0897061	31.0874	0.036024	45.1255
		0.008512	12.5343	0.0421061	15.1026	0.0844449	27.0998	-0.0896449	30.8019	0.036064	45.1437
		0.008528	12.6574	0.042102	14.7188	0.0844776	26.6333	-0.0896408	30.9532	0.036072	45.1709
		0.008528	12.7572	0.0421347	14.9448	0.0844694	26.9041	-0.0896204	30.8825	0.036072	45.1916
		0.008496	12.8997	0.0421592	15.2678	0.0845306	27.1816	-0.0895796	30.5481	0.036104	45.2098
		0.008512	13.0086	0.0421837	15.1674	0.0845102	26.4351	-0.0895429	30.3645	0.036176	45.2266
		0.008528	13.0565	0.0421918	14.7135	0.0845347	27.2035	-0.0895429	30.426	0.03624	45.2383
		0.008512	13.0811	0.0422122	14.5654	0.0846082	27.3396	-0.0894857	30.0633	0.036296	45.2551
		0.008472	13.1843	0.0422286	15.0596	0.0845265	26.5533	-0.0893878	29.6484	0.03632	45.2759
		0.008448	13.3212	0.0422408	15.1039	0.0846041	27.4961	-0.0892857	29.4298	0.036304	45.2914
		0.00844	13.4183	0.0422531	14.7022	0.0846204	27.138	-0.0891837	29.1185	0.03632	45.3121
		0.008424	13.461	0.0422571	14.4373	0.0845796	27.1479	-0.0890408	28.5894	0.036344	45.3303
		0.0084	13.474	0.0422612	14.7393	0.0846408	27.6151	-0.0889347	28.2425	0.036376	45.3445
		0.008392	13.6049	0.0422612	14.9586	0.0846531	27.2583	-0.0888408	27.9545	0.036376	45.3614
		0.0084	13.7461	0.0422653	14.8199	0.084649	27.627	-0.0887143	27.5943	0.036424	45.3821
		0.008408	13.4588	0.0422653	14.4552	0.084698	27.7486	-0.0886245	27.3815	0.036456	45.4042
		0.008464	12.4564	0.0422571	14.4876	0.0846857	27.5141	-0.0885429	27.1634	0.036504	45.4262
		0.008576	10.9814	0.0422612	15.0492	0.0847265	28.0334	-0.0884612	26.9335	0.036528	45.443
		0.00872	9.79128	0.0422939	15.1576	0.0847633	27.9918	-0.0884082	26.8462	0.036552	45.4573
		0.008832	9.11525	0.042302	14.7288	0.0847837	28.1087	-0.0883796	26.6593	0.036568	45.4741
		0.008888	8.9377	0.0423143	14.6555	0.0848653	28.2627	-0.0883347	26.5887	0.036608	45.4962
		0.008872	9.13723	0.0423429	15.622	0.0849061	28.2118	-0.0883184	26.736	0.03668	45.5182
		0.008832	9.68626	0.0423551	16.0409	0.0849714	28.4853	-0.0882857	26.6118	0.03672	45.5364
		0.008744	10.2962	0.0423224	15.7139	0.085049	28.2844	-0.0882041	26.3772	0.036696	45.5519
		0.008688	10.5189	0.0423102	15.4476	0.085049	28.5646	-0.0882082	26.5391	0.036672	45.5739
		0.00868	10.401	0.0423184	16.0441	0.085102	28.8308	-0.0881796	26.3666	0.036664	45.5934
		0.008664	10.1768	0.0423184	16.3705	0.0850939	28.4093	-0.0881061	25.9979	0.036736	45.6231
		0.008664	10.112	0.0423061	16.0897	0.0851143	28.9424	-0.0880694	26.0606	0.036864	45.6644
		0.00868	10.1262	0.0423184	15.6225	0.0851673	28.8532	-0.0881143	26.2568	0.036968	45.7132
		0.008704	10.2286	0.0423388	15.8379	0.0851673	28.5711	-0.0880694	26.0408	0.036952	45.7596
		0.008608	10.6187	0.0423469	16.3744	0.0852408	29.313	-0.0880776	26.0778	0.036936	45.8034
		0.00852	11.2844	0.0423469	16.383	0.0852571	28.6166	-0.0881224	26.2364	0.03696	45.8242
		0.008408	12.0291	0.0423592	16.1769	0.085249	28.799	-0.088098	26.0197	0.037	45.8423
		0.00836	12.6211	0.042351	16.1994	0.0853592	29.3823	-0.0880735	25.9814	0.037	45.8579
		0.008368	13.0626	0.0423551	16.6493	0.0853959	28.3247	-0.0881143	26.2496	0.037032	45.8721
		0.008384	13.3667	0.0423592	16.7676	0.0854857	29.0018	-0.0881061	26.288	0.037104	45.8993
		0.008368	13.509	0.0423633	16.5568	0.0856327	29.2681	-0.0881306	26.4584	0.03724	45.9486
		0.008328	13.3409	0.0423714	16.2212	0.0856041	28.1727	-0.0882041	26.7907	0.037328	46.0108
		0.008304	13.0446	0.0423959	16.3607	0.0856041	29.0593	-0.0882163	26.7253	0.037424	46.0769
		0.008328	12.8544	0.0423878	16.7247	0.0856367	28.9986	-0.0882204	26.7644	0.037488	46.1365
		0.008368	12.9526	0.0423592	16.6752	0.0854816	28.034	-0.0882571	26.9262	0.037528	46.1702
		0.008312	13.3824	0.0423388	16.2761	0.0854653	29.0414	-0.0882857	27.1092	0.03756	46.1935
		0.008336	13.7734	0.0423143	16.2279	0.0854898	28.577	-0.088351	27.4211	0.037584	46.213
		0.00836	13.7241	0.0423102	16.6032	0.0854122	28.1311	-0.0884204	27.6827	0.037608	46.2298
		0.008392	13.4545	0.0423224	16.578	0.085449	29.0098	-0.0884694	27.9688	0.037624	46.2454
		0.0084	13.4027	0.0423388	16.3202	0.0854531	28.3538	-0.0885633	28.3356	0.037632	46.2622
		0.008336	13.715	0.0423469	16.0632	0.0853673	28.184	-0.0886449	28.6097	0.037656	46.2765
		0.008344	13.8589	0.0423469	15.9885	0.0853878	29.0237	-0.0887224	28.8654	0.037728	46.3024
		0.008368	13.5907	0.0423306	15.8927	0.0853143	27.9059	-0.0888082	29.2545	0.037784	46.3231
		0.0084	13.298	0.0423224	15.8406	0.0851959	27.9507	-0.0888898	29.526	0.037832	46.3426
		0.008384	13.307	0.0423061	15.4382	0.0852694	28.4317	-0.0889551	29.6774	0.037856	46.3594
		0.00836	13.6529	0.0422898	15.1893	0.0851959	27.3866	-0.0890082	29.867	0.03788	46.375
		0.008336	13.9107	0.0422898	15.3247	0.0851673	27.8742	-0.0890122	29.8043	0.037896	46.3931
		0.008344	13.7643	0.0422857	15.5718	0.0852041	27.9013	-0.0890082	29.5948	0.03788	46.4112
		0.008384	13.43	0.0422571	15.1041	0.0851878	27.567	-0.089	29.5314	0.03788	46.4242
		0.008376	13.1933	0.0422653	14.4844	0.0851796	28.0771	-0.0890286	29.6893	0.037912	46.4372
		0.008416	13.0292	0.0422776	14.5781	0.0851918	27.6886	-0.0890286	29.5519	0.037944	46.4527
		0.008424	12.9399	0.0422857	15.1264	0.0851224	27.6001	-0.0890571	29.7051	0.037976	46.4722
		0.008416	12.9283	0.0423061	14.8952	0.0851347	28.044	-0.089098	29.9483	0.038	46.4942
		0.008416	12.9425	0.0423184	14.2404	0.0850694	27.5063	-0.0891469	30.0289	0.038	46.5175
		0.008416	12.8531	0.0423061	14.1697	0.0850327	27.8683	-0.0891429	29.9257	0.038024	46.537
		0.008416	12.6833	0.0423061	14.6196	0.085049	27.7797	-0.089151	30.0208	0.038016	46.5616
		0.008448	12.5097	0.042302	14.6249	0.0850122	27.3444	-0.0891224	29.8544	0.037984	46.5745
		0.008448	12.3179	0.0422816	13.9821	0.0850286	27.7943	-0.0891265	29.828	0.037976	46.5849
		0.008448	12.1079	0.0422816	13.6637	0.0850245	27.2479	-0.0891061	29.7282	0.038016	46.6095
		0.008448	11.9459	0.0422939	13.9293	0.0849633	27.2459	-0.0890735	29.4812	0.038056	46.6264
		0.008488	11.8461	0.0422857	14.1466	0.0849878	27.9594	-0.0890122	29.1039	0.03808	46.6497
		0.008512	11.7904	0.042298	13.6512	0.0849551	27.5518	-0.0890122	29.2089	0.038096	46.6692
		0.00856	11.7502	0.0422939	13.2567	0.0849714	27.9211	-0.0889673	28.9638	0.038128	46.6964
		0.008584	11.6932	0.0422898	13.4258	0.0849878	27.9759	-0.0888898	28.5535	0.038176	46.7119
		0.008592	11.5794	0.042298	13.9604	0.0850327	28.0744	-0.0888204	28.364	0.0382	46.734
		0.008608	11.3868	0.0423102	13.9412	0.0850694	28.0487	-0.0887673	28.2061	0.038208	46.7482
		0.008648	11.1902	0.0423061	13.7654	0.0851102	28.1656	-0.0886653	27.6431	0.038256	46.7741
		0.00872	10.9038	0.0423102	13.7925	0.0851224	28.6406	-0.0885429	27.1668	0.038312	46.791
		0.008816	10.3908	0.0423184	14.0793	0.0851551	28.7483	-0.0884653	27.0048	0.038312	46.7988
		0.008936	9.73939	0.0423388	14.1612	0.0850939	28.2553	-0.0883837	26.6454	0.03828	46.8143
		0.008992	9.28368	0.0423388	13.8005	0.0851306	29.4009	-0.0882776	26.2509	0.038232	46.835
		0.009024	9.1295	0.0423469	13.4807	0.0851878	29.0065	-0.0882327	26.2047	0.03828	46.8558
		0.009008	9.12691	0.0423592	13.7284	0.0851306	28.3868	-0.0881918	26.0863	0.038328	46.8674
		0.00896	9.04267	0.0423878	14.4281	0.0852327	29.6975	-0.0880898	25.7019	0.038384	46.8934
		0.008984	8.7096	0.0423796	14.4472	0.0853265	29.1505	-0.0880204	25.6417	0.0384	46.9258
		0.009016	8.33914	0.0423959	14.2014	0.0852735	28.5328	-0.088	25.7138	0.038424	46.9465
		0.009032	8.20565	0.0424163	14.2913	0.0853347	29.7537	-0.0879184	25.3769	0.038464	46.9633
		0.00904	8.34024	0.0424163	14.7558	0.0854408	29.7193	-0.0878694	25.2819	0.03852	46.9789
		0.009048	8.66554	0.0424	14.8185	0.0853469	28.4886	-0.0878776	25.4053	0.038544	46.9906
		0.009	9.15917	0.0424041	14.6996	0.0853918	29.7743	-0.0878612	25.2013	0.03856	47.0087
		0.008928	9.63173	0.0424041	14.6263	0.0855102	29.4221	-0.0878245	24.9582	0.038544	47.0307
		0.00888	9.82186	0.0423918	14.9098	0.085449	28.437	-0.0878204	24.9931	0.038552	47.0528
		0.008792	9.9708	0.0424204	15.2831	0.0855143	29.3428	-0.0878041	24.9356	0.03856	47.0696
		0.008712	10.3543	0.0424816	15.2897	0.0856	29.1942	-0.0877714	24.7897	0.038584	47.0942
		0.008648	10.8079	0.042502	14.7724	0.0855878	28.8711	-0.0877673	24.8828	0.038592	47.1124
		0.008576	11.1784	0.0425469	14.8873	0.0856612	29.6071	-0.0877796	25.0876	0.038624	47.1279
		0.008536	11.7663	0.0425837	15.6399	0.0857184	29.035	-0.0877755	25.0559	0.03864	47.1344
		0.008504	12.8346	0.0425878	15.7509	0.0857061	29.068	-0.0877796	25.1246	0.038664	47.1577
		0.008504	13.8851	0.0425755	15.0598	0.0857878	29.2794	-0.0878204	25.4734	0.038704	47.1798
		0.008488	14.2697	0.0425592	14.8953	0.0857837	28.5983	-0.0878408	25.5646	0.038744	47.1901
		0.008496	14.0935	0.0425469	15.4199	0.0857796	28.8804	-0.0878531	25.632	0.03872	47.2083
		0.008496	14.1945	0.0425673	15.5956	0.0857959	28.7284	-0.0878939	25.912	0.038704	47.229
		0.008472	14.6981	0.0425714	15.406	0.0857388	28.3861	-0.0879102	26.0138	0.03872	47.2458
		0.008432	15.0942	0.0426	15.2805	0.0857469	28.9688	-0.0879673	26.1499	0.038752	47.2626
		0.008376	15.0889	0.0426367	15.4324	0.0856776	28.3108	-0.0880449	26.4406	0.038768	47.2769
		0.008344	15.1421	0.0426653	15.632	0.0856204	28.4119	-0.0881184	26.6989	0.038784	47.2987
		0.00828	15.3443	0.0426776	15.6207	0.0856408	28.472	-0.0882327	27.1534	0.038784	47.3205
		0.008232	15.5749	0.0426939	15.3558	0.0856122	27.9502	-0.0883592	27.608	0.038784	47.3332
		0.0082	15.6773	0.0426776	15.2957	0.0856	28.1966	-0.0884653	28.0144	0.0388	47.3551
		0.008136	15.8289	0.0426857	15.5917	0.0856163	27.7533	-0.088551	28.3031	0.038832	47.3717
		0.008072	15.9067	0.0426531	15.7442	0.085551	27.4316	-0.0886694	28.7425	0.038904	47.3924
		0.008032	15.965	0.0426245	15.3947	0.085551	27.5286	-0.0887714	29.0095	0.038976	47.408
		0.007984	16.0959	0.0426204	14.8959	0.0855061	27.1672	-0.0888735	29.322	0.039048	47.4235
		0.007944	16.2346	0.0426327	15.0293	0.0854694	27.119	-0.0889102	29.3913	0.039096	47.4404
		0.007864	16.3175	0.0426653	15.4608	0.0854122	27.0403	-0.0890204	29.7746	0.039128	47.4559
		0.007744	16.4532	0.0426898	15.291	0.0853469	26.7146	-0.0890694	29.8241	0.039144	47.4767
		0.00764	16.5927	0.0427143	14.81	0.0853551	27.0998	-0.0890939	29.9576	0.039136	47.4948
		0.007568	16.6534	0.0427061	14.7168	0.085302	26.2271	-0.089151	30.1142	0.03912	47.5168
		0.007528	16.7181	0.0427184	15.0981	0.0852571	26.5455	-0.089249	30.428	0.039136	47.5363
		0.007504	16.7945	0.0427143	15.0306	0.0853429	27.1659	-0.0892735	30.3586	0.039168	47.5518
		0.007488	16.8645	0.0427143	14.1552	0.0852653	26.1405	-0.0893265	30.5178	0.039168	47.5713
		0.00748	16.9786	0.042698	13.7311	0.0852163	26.9557	-0.0894082	30.7318	0.039104	47.5946
		0.007448	17.0887	0.042698	14.3607	0.0852571	27.1929	-0.0894653	30.7351	0.039096	47.6127
		0.007384	17.1263	0.0426816	14.5722	0.0851592	26.7298	-0.0894776	30.7041	0.039128	47.6257
		0.007376	17.2559	0.0426612	13.7814	0.0851306	27.2134	-0.0895306	30.8925	0.039168	47.6425
		0.007336	17.3531	0.0426571	13.2997	0.0850939	27.1784	-0.0895633	31.0391	0.039184	47.6607
		0.007296	17.3233	0.0426816	13.2238	0.0850653	27.1843	-0.0895837	30.9916	0.039216	47.6749
		0.007264	17.3233	0.0426857	13.1041	0.085049	27.185	-0.0895837	30.9949	0.039312	47.6918
		0.007192	17.4373	0.0426816	12.937	0.0850082	26.8679	-0.0895918	31.0378	0.039408	47.7099
		0.007184	17.5579	0.0426694	12.6211	0.0850082	27.1982	-0.0895918	31.0206	0.039392	47.732
		0.007208	17.6201	0.0426408	12.5576	0.0850204	27.0126	-0.0895714	30.7292	0.039376	47.7592
		0.007216	17.7186	0.0426367	13.1516	0.0849469	26.8295	-0.089551	30.7147	0.039336	47.7825
		0.00716	17.8339	0.0426327	13.4464	0.0849673	27.4466	-0.0895592	30.8131	0.039368	47.7903
		0.007168	17.5787	0.0426327	12.9389	0.084951	27.2121	-0.089551	30.6864	0.0394	47.8032
		0.007336	16.6357	0.0426204	12.8087	0.0849061	27.3231	-0.089551	30.6461	0.03944	47.8201
		0.007576	15.3821	0.0426122	12.7909	0.0849143	27.4109	-0.0895347	30.6844	0.039488	47.846
		0.00784	14.4133	0.0425959	12.8193	0.0849102	27.3978	-0.0895184	30.4974	0.039536	47.8655
		0.008008	13.9755	0.0425918	12.7592	0.0849347	27.7657	-0.0895143	30.4452	0.039552	47.8823
		0.00804	13.8628	0.0425878	12.67	0.0849429	27.372	-0.0894408	30.2028	0.039592	47.9043
		0.008056	13.8032	0.0425633	12.6654	0.0849306	27.5788	-0.0893429	29.9781	0.039648	47.9264
		0.008072	13.5984	0.0425714	12.9442	0.085	27.9574	-0.0893347	30.0039	0.039672	47.9419
		0.008112	13.3716	0.0425755	13.2032	0.0849673	27.1461	-0.0892776	29.885	0.039704	47.9549
		0.008152	13.1556	0.0425551	13.1596	0.0849714	27.7539	-0.0891633	29.4707	0.039744	47.9691
		0.0082	12.954	0.0425265	13.2072	0.0850327	27.6859	-0.0891184	29.3279	0.039768	47.9808
		0.0082	12.8401	0.0425061	13.2588	0.0849918	27.1851	-0.0890857	29.1468	0.039776	47.9938
		0.008176	12.7961	0.0424857	13.3083	0.0850204	27.8273	-0.0889796	28.6961	0.039784	48.0054
		0.008232	12.7054	0.0424816	13.3815	0.0849837	27.5036	-0.0889184	28.4515	0.039808	48.0093
		0.008312	12.5537	0.0424816	13.1417	0.0849061	27.6469	-0.0888694	28.2633	0.0398	48.0093
		0.008344	12.2531	0.0425061	13.0313	0.0849143	27.9443	-0.0887755	28.0149	0.039816	48.0106
		0.008376	11.9485	0.0425388	13.8433	0.0848939	27.637	-0.0887061	27.9344	0.039832	48.0158
		0.00836	11.8059	0.0425878	14.7901	0.0848898	28.1147	-0.0886367	27.7078	0.039848	48.0197
		0.008376	11.9304	0.0425837	14.1995	0.0849551	27.8894	-0.0885592	27.4885	0.039904	48.0197
		0.008368	12.2621	0.0425673	13.7455	0.084951	27.5776	-0.0885388	27.6199	0.039992	48.0119
		0.008336	12.8306	0.0425837	14.66	0.0849796	28.4325	-0.0885184	27.5373	0.040008	48.0093
		0.008304	13.2553	0.0425837	15.3147	0.0849755	27.787	-0.0884816	27.3007	0.04004	48.0132
		0.008328	13.1972	0.0425633	14.8383	0.0849265	27.7843	-0.0884898	27.456	0.040008	48.0158
		0.008408	12.8179	0.0425755	14.4974	0.0849633	28.1648	-0.0884857	27.4078	0.040032	48.0106
		0.008464	12.5213	0.0425837	14.9388	0.0849388	27.4546	-0.0884286	27.0616	0.040048	48.0132
		0.008464	12.4436	0.0425959	15.3062	0.0849265	27.52	-0.0884245	27.1944	0.040088	48.0119
		0.008456	12.5978	0.0426082	15.106	0.0849429	27.4229	-0.0884327	27.3134	0.04012	48.0171
		0.008424	12.9835	0.0426122	14.7572	0.0849673	27.4453	-0.0883918	27.1839	0.040128	48.0158
		0.0084	13.5274	0.0426041	15.0142	0.0849918	27.551	-0.0884	27.3604	0.04012	48.0119
		0.008344	14.1077	0.0426163	15.6849	0.0849837	27.2253	-0.0884327	27.5956	0.040168	48.0106
		0.008224	14.6166	0.0426163	15.7892	0.085	27.452	-0.088502	27.8256	0.040184	48.0158
		0.008136	14.8006	0.0426122	15.5507	0.0850367	27.2669	-0.0885592	28.062	0.040176	48.0106
		0.00816	14.6375	0.0426408	15.5044	0.0849796	26.8032	-0.0886408	28.3495	0.040168	48.0132
		0.008144	14.4395	0.0426653	15.7528	0.0849918	27.1117	-0.0887429	28.6771	0.040216	48.1117
		0.008144	14.5016	0.0426939	15.8835	0.0849633	26.6063	-0.0888245	28.9758	0.04028	48.1946
		0.00812	14.9145	0.0427224	15.6325	0.0849102	26.6287	-0.0888653	29.1244	0.040336	48.0586
		0.00808	15.5167	0.0427469	15.1747	0.0849184	26.8461	-0.0889347	29.3385	0.0404	47.6104
		0.008048	15.9741	0.0427633	15.6815	0.0848857	26.0639	-0.0890571	29.7316	0.040424	47.3502
		0.00804	16.3211	0.0427878	16.3917	0.0849143	26.6136	-0.0891184	29.836	0.040432	47.669
		0.008032	16.404	0.0427878	16.142	0.0849429	26.4478	-0.0892	29.9999	0.040432	48.0858
		0.008024	16.2201	0.0427837	15.4291	0.084898	25.7832	-0.0893102	30.3137	0.040432	48.297
		0.008008	16.1256	0.0427918	15.439	0.0849959	26.6454	-0.0893959	30.4875	0.040448	48.2206
		0.00796	16.4932	0.0427918	15.5877	0.0849878	26.1691	-0.0894286	30.4491	0.040448	48.3126
		0.007912	16.9632	0.0427959	15.4457	0.0849184	26.2397	-0.0895551	30.9274	0.040464	48.4357
		0.007952	16.8933	0.0428204	14.8947	0.0849673	26.6606	-0.0896449	31.1428	0.040536	48.4176
		0.008056	16.4687	0.0428327	14.7064	0.084951	26.5766	-0.0896571	31.0682	0.040576	48.3424
		0.008128	16.1114	0.0428408	15.0056	0.084951	26.8508	-0.0897388	31.4191	0.040616	48.332
		0.008104	15.9507	0.0428653	15.2415	0.0849796	26.942	-0.0897878	31.5677	0.040608	48.507
		0.008112	15.8393	0.0428776	14.629	0.0850163	26.862	-0.089751	31.3813	0.040648	48.551
		0.00808	15.8406	0.0428776	14.1651	0.0850857	27.0477	-0.0897878	31.563	0.040688	48.5588
		0.008056	16.2044	0.0428735	14.6957	0.0851061	26.9261	-0.0898286	31.6548	0.040784	48.5329
		0.008024	16.7496	0.0428939	15.2751	0.0851224	26.9379	-0.0898367	31.6336	0.040824	48.6145
		0.008	16.8622	0.0428776	14.8925	0.0851388	27.0291	-0.0898571	31.7077	0.040864	48.6703
		0.008008	16.5296	0.0428694	14.3738	0.0851306	27.1242	-0.0898735	31.6707	0.04092	48.6392
		0.008032	16.0713	0.0428816	14.5588	0.0851469	27.2814	-0.089902	31.6958	0.040944	48.7568
		0.008072	15.698	0.0429061	14.8905	0.0851265	27.0343	-0.0899184	31.6992	0.04096	48.7464
		0.008128	15.1373	0.042898	14.6341	0.0851184	27.4248	-0.0898776	31.5083	0.040984	48.7529
		0.008232	14.6505	0.0429184	13.947	0.085151	27.3303	-0.089898	31.5916	0.040984	48.7582
		0.008368	14.4097	0.0429184	13.8229	0.0851673	27.3647	-0.0898898	31.5625	0.041008	48.8927
		0.008384	14.3592	0.0429388	14.2544	0.0852041	27.588	-0.0897878	31.162	0.04104	48.815
		0.0084	14.2438	0.0429469	14.2669	0.0852571	27.6171	-0.0897714	31.2116	0.041056	48.881
		0.008424	14.0131	0.0429347	13.6617	0.0853143	27.9256	-0.0897959	31.2281	0.041056	49.0076
		0.008504	13.5741	0.0429224	13.556	0.0854	28.1813	-0.0897224	30.9063	0.041072	49.0878
		0.008592	13.1339	0.0429306	14.3904	0.0853714	27.9164	-0.089702	30.8456	0.041112	49.1758
		0.008704	12.695	0.0429388	14.648	0.0854408	28.7218	-0.0896939	30.8436	0.041176	49.0039
		0.008784	12.4475	0.0429224	13.9596	0.0854327	28.0974	-0.0896449	30.5185	0.041288	48.7645
		0.008816	12.3658	0.0429265	13.6207	0.0854122	28.221	-0.0895592	30.171	0.041296	48.8214
		0.008808	12.2932	0.0429347	13.9663	0.0854612	28.6775	-0.0894857	29.9199	0.04128	49.1358
		0.008824	12.0159	0.042951	14.2669	0.0854694	28.0625	-0.0894408	29.7448	0.04132	49.1849
		0.008856	11.6859	0.0429429	13.8659	0.0854653	28.4958	-0.0893265	29.3873	0.041336	49.1732
		0.008872	11.4777	0.0429469	13.593	0.0855551	28.5011	-0.0891918	28.9381	0.041368	49.2562
		0.008888	11.3768	0.042951	14.3045	0.0855306	27.9593	-0.0890735	28.5787	0.041424	49.2769
		0.00888	11.1514	0.0429429	15.024	0.0856082	28.4879	-0.0889469	28.1922	0.041464	49.3469
		0.00884	10.8274	0.0429388	14.7016	0.0856286	28.102	-0.0887837	27.6398	0.04152	49.33
		0.008824	10.6524	0.0429224	14.2272	0.0856327	28.2566	-0.0886939	27.3709	0.041568	49.2873
		0.00884	10.6913	0.0429265	14.6547	0.0856653	28.696	-0.0885796	27.0683	0.0416	49.203
		0.008864	10.7172	0.042951	15.2527	0.0856204	28.4337	-0.088502	26.9519	0.041584	49.308
		0.008872	10.6848	0.0429469	14.8583	0.0855837	28.9292	-0.088449	26.7603	0.041616	49.4143
		0.008904	10.5733	0.0429224	14.263	0.0855673	28.8136	-0.0883714	26.5133	0.041624	49.5102
		0.008848	10.3349	0.0429061	14.8953	0.0855306	28.6729	-0.0883102	26.3052	0.041672	49.4726
		0.0088	10.1236	0.0428816	15.7615	0.0855224	28.6438	-0.0882612	26.1321	0.041664	49.4117
		0.008768	10.1638	0.0428531	15.5064	0.0855347	28.7383	-0.0882408	26.099	0.041656	49.378
		0.008728	10.6057	0.0428816	15.1477	0.085502	28.108	-0.0882082	26.1241	0.041672	49.6113
		0.008696	11.1252	0.0429061	15.62	0.0854694	28.3234	-0.0881837	26.0567	0.041776	49.6385
		0.008704	11.3312	0.0429306	16.2324	0.0854816	28.3161	-0.0881184	25.902	0.04188	49.6164
		0.008728	11.1758	0.0429633	16.2886	0.0855184	28.3068	-0.0880898	25.9641	0.041928	49.5918
		0.0088	10.852	0.0429796	15.9074	0.0854939	28.0848	-0.088	25.6423	0.041936	49.6981
		0.008848	10.4684	0.0429469	16.0045	0.0854816	28.071	-0.0879592	25.491	0.041944	49.7201
		0.00888	10.2675	0.0429347	16.7147	0.0854571	27.9494	-0.0879551	25.5154	0.041944	49.8549
		0.008888	10.4528	0.0429061	16.613	0.0854122	28.0202	-0.0879551	25.6642	0.041984	49.6359
		0.00884	10.993	0.042898	15.6504	0.0854	28.3592	-0.0879714	25.6516	0.042016	49.5335
		0.00876	11.7053	0.0428898	15.618	0.0853306	27.6952	-0.0879796	25.6615	0.04204	49.5931
		0.008664	12.3671	0.042902	16.5449	0.0853633	28.4021	-0.0879796	25.8275	0.04204	49.8108
		0.008568	12.8787	0.0429143	16.6441	0.0853673	27.8505	-0.0879796	25.9405	0.04208	49.7797
		0.008512	13.1647	0.0429306	16.2496	0.0853469	27.7262	-0.0879551	25.7746	0.042224	49.886
		0.00848	13.2113	0.0429306	16.1882	0.0853429	27.6172	-0.0879143	25.721	0.042424	49.9366
		0.008488	13.2386	0.0429469	16.5847	0.0853592	27.8709	-0.0879102	25.8308	0.042544	49.9301
		0.00848	13.5482	0.0429755	16.6996	0.0853388	27.5201	-0.0879469	25.9682	0.042608	50.0221
		0.008464	14.0805	0.0429959	16.391	0.0853306	27.6654	-0.0880082	26.1888	0.04264	50.0208
		0.008448	14.561	0.0430163	15.9853	0.0853143	27.6812	-0.0881061	26.537	0.042712	50.1711
		0.008408	14.7812	0.0430327	16.0805	0.0853265	27.8655	-0.0882122	26.9295	0.042808	50.1154
		0.008408	14.6219	0.0430776	16.393	0.0853061	27.4216	-0.0883143	27.1475	0.042888	50.2152
		0.008416	14.3229	0.043098	16.1961	0.0853388	28.0063	-0.0883551	27.3298	0.042952	50.2074
		0.008432	14.249	0.043098	15.5334	0.0853551	27.6502	-0.0883959	27.6113	0.04308	50.2463
		0.008432	14.5946	0.0431224	15.3875	0.0853551	27.6945	-0.0884204	27.8268	0.043184	50.2748
		0.008376	15.1968	0.0431347	15.9999	0.0854082	28.1286	-0.088502	28.1452	0.043216	50.3602
		0.008376	15.7097	0.0431388	15.8507	0.0854	27.5908	-0.0885429	28.4042	0.043296	50.3615
		0.008376	15.9546	0.0431551	15.036	0.0853918	28.0804	-0.0885918	28.549	0.043456	50.4067
		0.008432	15.882	0.0431918	14.7103	0.0854898	28.3414	-0.088702	28.917	0.0436	50.3407
		0.008448	15.558	0.0432204	14.9369	0.0854653	27.9449	-0.0887959	29.1343	0.04368	50.3757
		0.008472	15.2198	0.0432531	14.958	0.0854939	28.6828	-0.0888286	29.1349	0.043728	50.3951
		0.008456	15.2016	0.0432776	14.664	0.0855959	28.6762	-0.0889265	29.4844	0.043784	50.386
		0.008456	15.5892	0.0432939	14.3012	0.0855959	28.5487	-0.0889673	29.5063	0.04384	50.461
		0.008456	16.0998	0.0433184	14.5866	0.0856612	29.1466	-0.0889714	29.4825	0.043952	50.4287
		0.008456	16.2242	0.0433388	15.209	0.0856898	28.548	-0.0889918	29.5816	0.044032	50.47
		0.008472	15.9481	0.043351	14.5192	0.0857673	28.9074	-0.0890082	29.6985	0.044128	50.5722
		0.008504	15.5853	0.0433347	13.6517	0.0858816	29.2926	-0.0890122	29.7533	0.044192	50.5878
		0.008496	15.3649	0.0433633	14.0436	0.085902	28.6035	-0.0890245	29.8504	0.044312	50.3678
		0.00852	15.1926	0.0433673	14.7002	0.0859878	29.3725	-0.0890571	29.9106	0.0444	49.7967
		0.008504	15.085	0.0433673	13.8665	0.0861102	29.0396	-0.0891184	30.1015	0.044544	48.912
		0.008544	14.9532	0.0433551	13.3379	0.086098	28.7376	-0.0891347	29.9675	0.044648	48.2761
		0.008592	14.8422	0.0433673	13.959	0.0862204	29.2688	-0.0891633	29.8816	0.044728	48.1117
		0.008656	14.6909	0.0433592	14.5866	0.0863061	28.908	-0.0892286	29.9827	0.0448	47.8732
		0.00872	14.4564	0.0433551	14.0019	0.0864041	29.103	-0.0892082	29.7752	0.044808	47.6996
		0.008808	14.1388	0.0433306	13.6214	0.0864735	29.0574	-0.0891878	29.7898	0.044768	47.7022
		0.008848	13.8459	0.0433429	13.9253	0.086498	28.8109	-0.0892041	29.9206	0.044736	47.7384
		0.008928	13.3746	0.043351	14.4062	0.0865388	29.1624	-0.0891673	29.6345	0.044776	47.7061
		0.008992	12.7802	0.0433469	14.0971	0.0865714	28.91	-0.0890735	29.2182	0.044808	47.6349
		0.009048	12.4073	0.0433469	13.7251	0.0865878	29.0276	-0.0890204	29.0041	0.044816	47.3811
		0.009072	12.3762	0.0433755	14.1776	0.0866776	29.2972	-0.088951	28.5839	0.044832	46.722
		0.009088	12.3969	0.0433918	14.9968	0.0867184	29.1313	-0.0888653	28.1287	0.044912	46.3026
		0.009112	12.358	0.0434	14.7762	0.0867918	29.3553	-0.0887673	27.8624	0.044928	46.7362
		0.009096	12.244	0.0434082	14.1472	0.0868408	29.2179	-0.088698	27.7131	0.044888	47.4095
		0.00916	12.025	0.0434204	14.7974	0.0868816	29.237	-0.088649	27.6338	0.044824	47.7268
		0.009192	11.6806	0.0434327	15.7118	0.0868898	29.2635	-0.0885551	27.3854	0.044784	47.9069
		0.00924	11.3169	0.0434245	15.3373	0.0868816	29.2165	-0.0884776	27.1654	0.044712	48.1726
		0.009272	11.1345	0.0434286	14.6601	0.0868204	28.982	-0.088449	27.0742	0.04468	48.3605
		0.009288	11.1721	0.0434367	15.3928	0.0867755	28.9681	-0.0884163	26.9322	0.044624	48.3864
		0.009288	11.2058	0.0434408	16.0152	0.0867265	28.4983	-0.0883224	26.4274	0.044624	48.1376
		0.009288	11.2369	0.0434286	15.5414	0.0866612	28.3484	-0.0882286	26.0904	0.044616	48.0352
		0.009224	11.2382	0.0434408	15.0729	0.0866776	28.3814	-0.0881551	25.982	0.044648	48.1026
		0.009232	11.1708	0.0434408	15.8234	0.0866408	27.9289	-0.0880571	25.6595	0.04464	48.1687
		0.009224	11.071	0.043449	16.3685	0.0866367	28.1667	-0.0879878	25.4744	0.04464	48.1856
		0.009216	10.9401	0.0434408	15.8756	0.0865878	27.8668	-0.0879306	25.341	0.044624	48.2283
		0.0092	10.8611	0.0434408	15.4079	0.0865592	28.026	-0.0878816	25.238	0.044592	48.4602
		0.009136	10.8287	0.0434367	16.1129	0.0865224	27.8728	-0.0878694	25.2711	0.044584	48.3501
		0.009144	10.8403	0.0434367	16.7075	0.086449	27.7671	-0.0878531	25.2302	0.04464	48.2088
		0.009128	10.9543	0.0434367	16.4267	0.0864735	27.9474	-0.0878122	25.1258	0.044632	48.1959
		0.00912	11.3841	0.0434367	15.9893	0.0864367	27.559	-0.0878327	25.3213	0.04464	48.4304
		0.00908	12.0368	0.0434408	16.4042	0.0864612	27.9336	-0.0878286	25.285	0.044624	48.2813
		0.009072	12.6274	0.0434531	16.948	0.0864163	27.3893	-0.0878122	25.0921	0.044664	47.8992
		0.009032	13.1505	0.0434531	16.5463	0.086351	27.5763	-0.0878041	25.0307	0.04468	47.8188
		0.008928	13.6075	0.043449	15.7786	0.086302	27.5201	-0.0878041	25.0353	0.044768	47.9108
		0.008904	13.8978	0.0434571	15.9874	0.0862531	27.5393	-0.0877878	24.9322	0.044768	48.0171
		0.008896	14.2062	0.0434531	16.6646	0.0861755	27.384	-0.0878082	25.1152	0.0448	48.1402
		0.008864	14.6193	0.0434449	16.5278	0.086151	27.7229	-0.0878367	25.3352	0.04476	48.2556
		0.008776	14.8871	0.0434449	15.9761	0.0861673	27.6429	-0.0879429	25.8479	0.044728	48.3476
		0.008672	15.1796	0.0434367	15.9569	0.0861551	27.6773	-0.0880327	26.1486	0.044712	48.3981
		0.008608	15.5775	0.0434367	16.3276	0.0861102	27.7228	-0.0881469	26.5966	0.04468	48.4098
		0.008552	16.0739	0.0434408	16.2001	0.086102	27.8728	-0.0882531	26.9626	0.044696	48.3437
		0.008512	16.3627	0.0434408	15.353	0.0860694	27.6495	-0.0883551	27.4145	0.04472	48.2918
		0.008496	16.2888	0.0434367	15.0228	0.0860408	27.6647	-0.0883837	27.4548	0.044736	48.3152
		0.008496	16.0621	0.0434367	15.4476	0.0860163	27.8391	-0.0884531	27.8004	0.044712	48.3774
		0.008448	16.242	0.0434286	15.696	0.0860939	27.8352	-0.0885551	28.1327	0.044696	48.3968
		0.008448	16.7392	0.0434122	15.1021	0.0860939	27.7394	-0.0886286	28.3216	0.044736	48.3942
		0.008432	17.068	0.0434041	14.6674	0.0861184	27.9185	-0.0887265	28.5496	0.044744	48.3605
		0.008464	16.8636	0.0434082	15.04	0.0861347	28.0956	-0.0888367	28.9593	0.044784	48.3631
		0.008456	16.5063	0.0434082	15.4285	0.086151	27.826	-0.0889224	29.2507	0.044728	48.3994
		0.008464	16.3666	0.0434163	14.8173	0.0861347	28.0057	-0.0889755	29.4119	0.044712	48.5107
		0.008472	16.7199	0.0434163	14.1592	0.0861673	28.1873	-0.0890898	29.7799	0.044776	48.4056
		0.008472	17.1705	0.0434122	14.4307	0.0861673	28.2514	-0.0891102	29.737	0.044864	47.898
		0.008456	17.1911	0.0434082	14.8939	0.0861918	28.3175	-0.0891878	29.8949	0.044976	47.0718
		0.008464	16.817	0.0434082	14.4684	0.0862367	28.7073	-0.0892939	30.1413	0.04504	46.7469
		0.008496	16.5065	0.0433878	13.8044	0.0862857	28.5454	-0.0893429	30.136	0.044992	46.7793
		0.00848	16.6851	0.0433878	13.883	0.0862776	28.3769	-0.0893878	30.2265	0.044944	46.9815
		0.008464	17.111	0.0433918	14.5093	0.086351	28.8433	-0.0895102	30.7391	0.04492	47.0256
		0.008448	17.414	0.0433878	14.1307	0.0863347	28.3887	-0.0895469	30.7563	0.045	46.7936
		0.008456	17.2118	0.0433796	13.2679	0.0863061	28.3557	-0.0895347	30.6294	0.04504	46.5668
		0.008472	16.7586	0.0433837	13.3478	0.0862776	28.431	-0.0896041	30.9644	0.045096	46.4151
		0.008488	16.3509	0.0433878	14.2154	0.0863102	28.5077	-0.0896571	31.1118	0.045144	46.076
		0.008512	16.0557	0.0433878	13.8118	0.0862653	28.1708	-0.0896531	30.9123	0.045224	45.8
		0.00856	15.8471	0.0433755	13.009	0.0863061	28.581	-0.0896898	31.0807	0.045264	45.7998
		0.0086	15.6643	0.0433755	13.1775	0.0863347	28.4125	-0.0897469	31.2854	0.045232	45.9188
		0.008688	15.5127	0.0433918	14.1177	0.0863755	28.4588	-0.0897673	31.2497	0.045232	45.9395
		0.008728	15.352	0.0434	13.646	0.0864041	28.4086	-0.0897959	31.3396	0.045256	45.9278
		0.008776	15.1667	0.0434	12.941	0.0864531	28.3854	-0.0897918	31.3079	0.045312	45.8669
		0.0088	15.0422	0.0434204	13.3229	0.0864694	28.0597	-0.0897714	31.1692	0.04536	45.4915
		0.008904	14.9363	0.0434367	14.2677	0.0864939	28.1086	-0.0897755	31.2465	0.045344	45.203
		0.008976	14.732	0.0434286	14.0093	0.0864776	27.7862	-0.0897592	31.1528	0.045432	45.0504
		0.00904	14.4084	0.0434245	13.5475	0.0864571	27.8841	-0.089698	30.8389	0.04544	45.0296
		0.009128	13.85	0.0434367	14.0013	0.0864612	27.995	-0.0897061	30.9704	0.045392	44.8508
		0.009232	13.323	0.0434408	14.8608	0.0864122	27.4764	-0.0897184	31.0715	0.045432	44.4985
		0.009352	13.0836	0.043449	14.7398	0.0864449	28.0295	-0.0896612	30.6922	0.045472	44.2614
		0.009376	13.1148	0.0434531	14.1293	0.0864735	27.7091	-0.0896	30.4378	0.045464	44.2404
		0.009432	13.0746	0.0434571	14.5271	0.0864735	27.6264	-0.0895755	30.4497	0.045448	44.2909
		0.009472	12.9412	0.0434939	15.3338	0.0864898	27.7453	-0.0895347	30.2032	0.04544	44.2249
		0.009488	12.7689	0.0435184	15.1481	0.0864612	27.2723	-0.0894735	29.8603	0.045488	43.9442
		0.009464	12.5913	0.0435347	14.3798	0.0864367	27.4698	-0.0894082	29.7521	0.045552	43.6945
		0.009496	12.3917	0.043551	15.0206	0.0864286	27.224	-0.0893551	29.6094	0.045656	43.4718
		0.009528	12.1507	0.0435633	15.8175	0.086351	26.926	-0.089249	29.17	0.045664	43.5156
		0.009552	11.9977	0.0435429	15.4641	0.0863633	27.1705	-0.0891551	28.96	0.045616	43.7385
		0.009552	11.8591	0.043551	14.7208	0.0863061	26.7926	-0.0890694	28.8338	0.045544	43.6464
		0.009576	11.7411	0.0435592	15.3399	0.0862286	26.9716	-0.089	28.512	0.045656	43.2178
		0.0096	11.7061	0.0435714	15.9207	0.0862245	27.0291	-0.0889265	28.2465	0.045688	42.9379
		0.009592	11.7567	0.0436	15.554	0.0861633	26.8546	-0.0888816	28.1884	0.045768	42.9288
		0.009592	11.7048	0.0436163	14.9455	0.0861306	26.8943	-0.0888327	27.9373	0.045768	43.2929
		0.009616	11.653	0.0436245	15.5546	0.0861102	26.7285	-0.0887878	27.7398	0.045768	43.4225
		0.0096	11.6413	0.0436735	16.1612	0.0860735	26.6611	-0.0887224	27.6379	0.045824	42.9719
		0.009608	11.7696	0.0437388	15.698	0.0860367	26.5944	-0.0886531	27.5328	0.045848	42.7594
		0.0096	12.1416	0.0437796	15.0373	0.0860041	26.4484	-0.0885878	27.3365	0.0458	43.126
		0.009584	12.6961	0.0438245	15.5757	0.0859714	26.6677	-0.0885347	27.2949	0.045752	43.5676
		0.00952	13.0535	0.0438735	16.0773	0.0859551	26.3717	-0.0884653	27.121	0.045688	43.8654
		0.009464	13.025	0.0438694	15.4054	0.0859143	26.4801	-0.0884367	27.0345	0.045584	44.1578
		0.009448	12.7559	0.043849	14.6793	0.0859469	26.7166	-0.0884531	27.1733	0.045464	44.5747
		0.009448	12.6172	0.0438286	14.9086	0.0858857	25.9661	-0.0884694	27.2572	0.045424	44.913
		0.009464	12.7739	0.043849	15.3473	0.0859347	26.5872	-0.0884449	27.0557	0.045368	45.2875
		0.009456	13.3618	0.0438327	15.0135	0.0859469	26.4676	-0.0884571	27.145	0.045352	45.6915
		0.00932	14.179	0.0438408	14.5378	0.0858816	26.3758	-0.0884531	27.2097	0.04536	45.9113
		0.009168	14.8329	0.0438408	14.4955	0.0858735	26.6889	-0.0884449	27.1634	0.045352	46.2415
		0.009096	15.2653	0.0438612	14.8193	0.0858163	26.4266	-0.088449	27.2791	0.045312	46.5538
		0.009048	15.619	0.0438571	14.6746	0.0857592	26.7715	-0.0884571	27.3847	0.045296	46.87
		0.009008	15.8263	0.0438612	13.9345	0.0857796	26.7834	-0.0884571	27.4343	0.045344	46.8584
		0.008992	15.7758	0.0438694	13.7013	0.0858	26.8223	-0.0884857	27.6028	0.045344	47.0162
		0.009024	15.5853	0.0438898	13.9563	0.085849	27.1466	-0.0885224	27.7006	0.045344	46.9761
		0.009016	15.7784	0.0438776	14.1828	0.0858694	27.4102	-0.0885837	27.9146	0.045304	47.0021
		0.008968	16.2963	0.0438735	13.5737	0.085898	27.467	-0.0886612	28.2708	0.045296	47.235
		0.00888	16.7987	0.0438653	13.2857	0.085902	27.5133	-0.0887755	28.6625	0.045344	47.2763
		0.008848	16.9462	0.0438449	13.5632	0.0858408	27.2642	-0.0888735	28.8402	0.045432	46.753
		0.008824	16.836	0.0438571	14.1724	0.0858694	27.9335	-0.0889265	28.938	0.04548	46.1508
[truncated: 29,396 more rows]
