# Supplementary material for: Investigation of the Effect of Confining Pressure on the Mechanics-Permeability Behavior of Mudstone under Triaxial Compression
Source: Hindawi journal article supplement (doi:10.1155/2019/1796380), 2019-06-04
Supplement: f1 [file 1796380.f1.zip › Table_S3.xlsx]

## Sheet: Sheet1
Table S3: The data for relaionship of deviatoric stress and strain in the directioin of the minimum principal stress
P4		P5		P6		P7		P8		P9
ϵ3 (MPa)	σ1-σ3 (MPa)	ϵ3 (MPa)	σ1-σ3 (MPa)	ϵ3 (MPa)	σ1-σ3 (MPa)	ϵ3 (MPa)	σ1-σ3 (MPa)	ϵ3 (MPa)	σ1-σ3 (MPa)	ϵ3 (MPa)	σ1-σ3 (MPa)
0	3.98129	0	3.92952	0	4.02203	0	4.01655	0	3.99913	0	4.09608
-0.003741	5.02104	-0.003992	8.01821	-0.000257143	4.49322	0.000330612	4.77436	-0.000232653	4.41345	-0.001384	5.3821
-0.004801	5.3158	-0.007824	9.59438	-0.000506122	4.74027	-4.08163e-05	6.60776	-0.000428571	4.70811	-0.00692	9.08986
-0.00655	5.6842	-0.008064	9.48552	-0.000726531	4.7687	-0.000783673	7.65233	-0.000669388	5.02981	-0.007376	9.98198
-0.00858	6.05264	-0.008136	9.29539	-0.000881633	4.7278	-0.00111837	7.5301	-0.000906122	5.21603	-0.007688	10.3291
-0.01102	6.49472	-0.008312	9.66168	-0.000938776	4.87327	-0.00120816	6.79149	-0.00111837	5.3377	-0.007912	10.1283
-0.01305	6.86316	-0.008736	10.2625	-0.00112245	5.27944	-0.0013102	5.57383	-0.0013102	5.55301	-0.007864	9.58968
-0.01427	7.0842	-0.00912	10.2638	-0.00137143	5.73527	-0.000983673	4.85696	-0.00153878	5.86026	-0.00784	9.27475
-0.0163	7.45264	-0.009248	9.27566	-0.00160408	6.10993	-0.000865306	5.953	-0.00180408	6.00507	-0.007808	9.32918
-0.01792	7.74736	-0.009224	7.72814	-0.00181224	6.37097	-0.00147347	7.22939	-0.00202857	6.19205	-0.007856	9.72835
-0.02036	8.18948	-0.009064	6.19205	-0.00199184	6.54796	-0.00196327	7.44544	-0.00225714	6.36916	-0.007944	10.2087
-0.02158	8.41052	-0.008992	5.14834	-0.00217143	6.75029	-0.00214286	7.13167	-0.00253061	6.58447	-0.008112	10.6916
-0.0232	8.70528	-0.008864	4.68355	-0.0024	6.96642	-0.0022898	6.31109	-0.00278776	6.73962	-0.008296	10.9117
-0.02442	8.92632	-0.008872	4.76381	-0.0026449	7.11693	-0.0020449	5.73436	-0.00302857	6.97477	-0.008456	10.8275
-0.02564	9.14736	-0.008896	5.2908	-0.00290204	7.22713	-0.00197959	6.58002	-0.00328571	7.12873	-0.008544	10.4689
-0.02686	9.36844	-0.008968	5.97062	-0.00319184	7.43398	-0.00242857	7.50162	-0.0035551	7.34219	-0.008536	10.1078
-0.02848	9.66316	-0.009088	6.51317	-0.00348163	7.64598	-0.0027551	7.65086	-0.00378367	7.53527	-0.008568	9.972
-0.0293	9.81052	-0.009128	6.68261	-0.00374286	7.65784	-0.00297551	7.43809	-0.00404898	7.73623	-0.008624	10.1119
-0.03092	10.1053	-0.009112	6.34872	-0.0039102	7.58327	-0.00309796	6.786	-0.00427347	7.91787	-0.00868	10.4522
-0.03214	10.3263	-0.009088	5.55754	-0.00411837	7.65331	-0.00303673	6.79861	-0.00450204	8.11202	-0.008848	10.9585
-0.03336	10.5474	-0.009016	4.65619	-0.0043551	7.93207	-0.00315102	7.61591	-0.00472653	8.27246	-0.009072	11.2331
-0.03417	10.6947	-0.008936	4.05274	-0.0046449	8.13887	-0.00354286	7.99979	-0.00494694	8.45669	-0.009248	11.1709
-0.03498	10.8421	-0.008864	3.94392	-0.00491429	8.32254	-0.0037551	7.99318	-0.00517143	8.639	-0.00932	10.8715
-0.04584	10.8421	-0.008848	4.23274	-0.0052449	8.45927	-0.00396327	7.59416	-0.0054	8.76659	-0.009352	10.7419
-0.04607	11.0632	-0.008896	4.84267	-0.00550204	8.36214	-0.0039102	7.33445	-0.0056449	8.93123	-0.009384	10.7847
-0.0463	11.2842	-0.009	5.50056	-0.00564898	7.98096	-0.00408163	7.58153	-0.00589796	9.07604	-0.00948	11.0141
-0.04652	11.5053	-0.009096	6.0109	-0.00566122	8.08668	-0.00435918	7.75266	-0.00615102	9.22678	-0.009576	11.2525
-0.04678	11.7509	-0.009088	6.36422	-0.00578776	8.47913	-0.00452245	7.80358	-0.00637551	9.3853	-0.00972	11.4871
-0.04711	12.0784	-0.00904	6.54	-0.0058898	8.63508	-0.00466122	7.90136	-0.00664082	9.5497	-0.009928	11.5299
-0.04733	12.283	-0.009032	6.56851	-0.00597959	8.39461	-0.00478776	7.99717	-0.00687347	9.7141	-0.01008	11.3199
-0.04768	12.6269	-0.009016	6.66053	-0.00601633	7.68504	-0.00490204	8.13715	-0.00711429	9.9023	-0.01012	10.9856
-0.04812	13.0526	-0.009	7.00138	-0.00597959	6.41978	-0.00512245	8.33402	-0.00735918	10.0528	-0.010192	10.8339
-0.05091	13.6421	-0.009016	7.52362	-0.00581224	5.251	-0.00528571	8.412	-0.00761633	10.1354	-0.010256	10.7899
-0.05343	14.0105	-0.009024	8.00654	-0.00568163	4.76145	-0.00542449	8.53558	-0.00786939	10.2789	-0.010336	10.7743
-0.05595	14.379	-0.009096	8.29378	-0.00556735	5.11232	-0.00568163	8.66574	-0.00810204	10.3047	-0.010368	10.8223
-0.05847	14.7474	-0.009064	8.32598	-0.00560408	6.26853	-0.00593061	8.50722	-0.00831429	10.3669	-0.010432	11.0594
-0.06048	15.0421	-0.009032	8.26507	-0.00579184	7.55496	-0.00599184	8.44048	-0.00853469	10.4799	-0.010544	11.3834
-0.06249	15.3368	-0.00896	8.46466	-0.00596735	8.34779	-0.00613061	8.55144	-0.00878367	10.5692	-0.010736	11.736
-0.06451	15.6316	-0.00896	8.85216	-0.00607347	8.39138	-0.00631429	8.92866	-0.00898776	10.6049	-0.010936	11.8059
-0.06652	15.9263	-0.00896	9.31469	-0.00610204	7.67251	-0.00657551	9.01856	-0.00923673	10.7623	-0.011128	11.504
-0.06904	16.2947	-0.009008	9.67709	-0.00602041	6.39465	-0.00670204	8.93466	-0.0095102	10.8654	-0.011192	10.9107
-0.07055	16.5158	-0.009072	9.98506	-0.00577959	5.34811	-0.00678776	8.95244	-0.00977143	10.8628	-0.011192	10.4317
-0.07206	16.7368	-0.00908	10.2701	-0.00558367	5.26288	-0.00695102	9.11035	-0.00996735	10.8079	-0.01116	10.3552
-0.08748	16.8105	-0.009104	10.4826	-0.00559184	6.30081	-0.0071102	9.33365	-0.0102122	10.8971	-0.0112	10.6735
-0.08792	17.2526	-0.009104	10.3621	-0.00584082	7.5866	-0.00727755	9.33764	-0.0104816	10.9459	-0.011296	11.1903
-0.08814	17.4737	-0.009064	9.84677	-0.00603265	8.33782	-0.00740408	9.20025	-0.0107347	10.8924	-0.011424	11.7148
-0.08836	17.6947	-0.009016	9.42216	-0.00615102	8.27638	-0.00748163	9.27034	-0.010951	10.93	-0.011584	12.0539
-0.08851	17.8421	-0.008928	9.28502	-0.00618367	7.45112	-0.00762857	9.67335	-0.011249	11.1493	-0.011776	12.1728
-0.0888	18.1368	-0.008936	9.63067	-0.00604082	6.01337	-0.00806531	10.1483	-0.011498	11.1697	-0.011928	12.1549
-0.08902	18.3579	-0.008928	10.2108	-0.00576735	4.87033	-0.0083102	9.8642	-0.0117265	11.2007	-0.01204	11.9143
-0.08924	18.579	-0.009056	10.6083	-0.00557143	4.73755	-0.00826939	9.51404	-0.0119429	11.3155	-0.012112	11.6672
-0.09192	18.8737	-0.009088	10.3105	-0.00553878	5.71337	-0.00839184	9.6878	-0.0121837	11.4357	-0.012128	11.5882
-0.09399	19.0947	-0.009112	9.53342	-0.0056898	7.08176	-0.00854694	10.186	-0.0123878	11.4423	-0.012192	11.7863
-0.09678	19.3895	-0.00908	8.7085	-0.00590204	8.15082	-0.00877959	10.1979	-0.012649	11.464	-0.012248	12.1201
-0.10066	19.6842	-0.00904	8.01562	-0.00607755	8.38273	-0.00890612	9.79026	-0.0128694	11.5599	-0.012416	12.4566
-0.10356	19.9053	-0.008928	7.61304	-0.00616327	7.75834	-0.00889388	9.81073	-0.0131143	11.5671	-0.012552	12.6121
-0.10647	20.1263	-0.008952	7.52755	-0.00608163	6.44895	-0.00900816	10.5811	-0.0133592	11.5367	-0.01268	12.5746
-0.10938	20.3474	-0.008944	7.6079	-0.00589796	5.03378	-0.00962857	11.1922	-0.0136204	11.6604	-0.012792	12.3286
-0.11131	20.4947	-0.008984	7.61309	-0.00567755	4.15376	-0.00992245	10.3221	-0.0138571	11.7099	-0.012824	12.2171
-0.11325	20.6421	-0.009048	7.42776	-0.00555102	4.18937	-0.00967755	9.76239	-0.014098	11.7595	-0.012856	12.3894
-0.11519	20.7895	-0.009072	6.90706	-0.00554694	5.09525	-0.00970612	10.4514	-0.0143429	11.901	-0.013024	12.7158
-0.12719	20.8632	-0.009048	6.26342	-0.0057102	6.29968	-0.0102367	11.2998	-0.0145755	12.0154	-0.013176	12.8804
-0.12789	21.2316	-0.009048	5.71824	-0.00592653	7.19816	-0.0105102	10.6715	-0.0147755	12.0518	-0.013312	12.9063
-0.12838	21.4526	-0.008992	5.22446	-0.00607755	7.31312	-0.0103673	10.09	-0.0149837	12.2052	-0.013384	12.8726
-0.13303	21.821	-0.008912	4.83466	-0.0061102	6.68089	-0.0104408	10.4825	-0.0152367	12.2614	-0.013448	12.8143
-0.13675	22.1158	-0.008888	4.68197	-0.00604898	5.37125	-0.0108939	11.4517	-0.0154367	12.3328	-0.013512	12.8286
-0.1414	22.4842	-0.008944	4.72982	-0.00587755	4.01077	-0.0112531	11.1208	-0.015698	12.455	-0.013584	12.861
-0.14586	22.8526	-0.009024	5.00674	-0.00572653	3.18093	-0.0111959	10.4106	-0.015951	12.5409	-0.01368	13.0554
-0.14816	23.0737	-0.009224	5.81122	-0.00564082	3.19283	-0.0112367	10.665	-0.0161918	12.5851	-0.013848	13.1629
-0.15046	23.2947	-0.009528	7.4328	-0.00565306	3.85357	-0.0115469	11.7941	-0.0164408	12.7488	-0.014024	13.2226
-0.15276	23.5158	-0.009928	9.31325	-0.00574286	4.79971	-0.0119755	11.7168	-0.0167061	12.8076	-0.014112	13.2187
-0.15506	23.7368	-0.010376	10.5995	-0.00585306	5.6784	-0.0119959	10.805	-0.0169265	12.9317	-0.01424	13.194
-0.15735	23.9579	-0.010728	11.1527	-0.00591429	6.25256	-0.0119551	10.8771	-0.0171592	13.0638	-0.014256	13.0696
-0.15965	24.179	-0.010952	11.1838	-0.00599592	6.3431	-0.0121551	11.9321	-0.0173714	13.1443	-0.01428	13.1318
-0.16195	24.4	-0.011008	11.0023	-0.00601633	5.82639	-0.0126776	12.0127	-0.0175388	13.2065	-0.0144	13.4528
-0.16348	24.5474	-0.011088	10.6265	-0.00596327	4.88953	-0.0128571	10.9906	-0.0177673	13.3691	-0.01456	13.6378
-0.1655	24.6947	-0.011112	9.95045	-0.00587755	3.87681	-0.0127469	10.8691	-0.0180204	13.4094	-0.01476	13.5732
-0.16664	24.7684	-0.011072	8.90923	-0.00578776	2.96177	-0.0128694	11.934	-0.0182571	13.5337	-0.014832	13.4829
-0.17734	24.7684	-0.011008	7.83557	-0.00573878	2.35315	-0.0134245	12.3476	-0.0185265	13.658	-0.014888	13.5282
-0.18023	24.9895	-0.01096	7.01434	-0.0057102	2.1106	-0.0136122	11.609	-0.0187959	13.8108	-0.014984	13.6741
-0.1824	25.1368	-0.010928	6.59717	-0.00573061	2.13571	-0.0134776	11.344	-0.0190367	13.8617	-0.01512	13.7841
-0.18798	25.3579	-0.010928	6.354	-0.00577959	2.2069	-0.0135918	12.115	-0.0192694	14.0308	-0.015232	13.7814
-0.19351	25.579	-0.01088	6.2663	-0.00584082	2.25171	-0.0141633	12.6336	-0.0195388	14.0777	-0.015288	13.7179
-0.19777	25.8	-0.010864	6.31646	-0.00584898	2.23981	-0.0144245	11.7813	-0.0197878	14.2065	-0.01536	13.7257
-0.20062	25.9474	-0.010936	6.43392	-0.00587347	2.25436	-0.0142653	11.2462	-0.0200408	14.2909	-0.015408	13.8979
-0.20346	26.0947	-0.010992	6.46613	-0.00593469	2.38727	-0.0142694	12.1976	-0.0202571	14.4249	-0.015576	13.9964
-0.20631	26.2421	-0.011008	6.44539	-0.00601633	2.80624	-0.0148653	13.0684	-0.0204939	14.4942	-0.015688	14.0689
-0.20915	26.3895	-0.010992	6.43373	-0.00610612	3.76896	-0.0151306	12.4117	-0.0207265	14.6355	-0.015808	14.0871
-0.21199	26.5368	-0.011048	6.41438	-0.00634286	5.30383	-0.0150449	11.8924	-0.0209551	14.687	-0.015952	14.1286
-0.21626	26.7579	-0.011016	6.3887	-0.00669796	6.89417	-0.0150776	12.6112	-0.0212	14.7604	-0.016064	14.0806
-0.22128	26.979	-0.011016	6.38352	-0.00704898	7.93078	-0.015698	13.3677	-0.021498	14.8226	-0.016104	14.1169
-0.22662	27.2	-0.011048	6.40915	-0.0073551	8.26114	-0.0159959	12.3787	-0.0217347	14.8682	-0.0162	14.323
-0.23196	27.421	-0.011008	6.42725	-0.00757959	7.88846	-0.0158	11.566	-0.0219755	14.9065	-0.01632	14.4202
-0.23552	27.5684	-0.010936	6.47002	-0.00767755	7.23438	-0.0157469	12.5504	-0.0222	14.9581	-0.016488	14.3722
-0.24086	27.7895	-0.010912	6.75384	-0.00775918	7.37182	-0.0162898	13.5765	-0.0224653	15.0315	-0.016512	14.2089
-0.24442	27.9368	-0.010936	7.31885	-0.00802857	8.05166	-0.0164776	13.4536	-0.0226857	15.0626	-0.01656	14.2711
-0.24976	28.1579	-0.010952	7.97026	-0.00831837	8.7348	-0.0165878	13.3525	-0.0229469	15.1373	-0.016728	14.5122
-0.25332	28.3053	-0.010984	8.58538	-0.00857143	9.20993	-0.016702	13.4695	-0.0231592	15.1122	-0.016912	14.6262
-0.25688	28.4526	-0.011016	9.10618	-0.00882041	9.33482	-0.0169388	13.7575	-0.0234571	15.2107	-0.017024	14.5796
-0.26044	28.6	-0.011064	9.48202	-0.00890204	9.10158	-0.0171755	13.7998	-0.0236898	15.2226	-0.017064	14.4344
-0.26578	28.821	-0.011072	9.66984	-0.00903265	9.38642	-0.0173755	13.7271	-0.0239224	15.3396	-0.017112	14.4487
-0.32414	28.821	-0.01104	9.7177	-0.0093102	9.84103	-0.0175633	13.7807	-0.0241469	15.3747	-0.017184	14.6625
-0.32336	28.0105	-0.010968	9.86506	-0.00959184	9.96722	-0.0177551	13.7133	-0.0243673	15.4745	-0.01732	14.8297
-0.32033	24.8421	-0.010976	10.2495	-0.00986122	9.91834	-0.018	13.7735	-0.0245837	15.5366	-0.017432	14.783
-0.31766	22.0421	-0.011008	10.7081	-0.0101102	9.4486	-0.018249	13.5264	-0.0248286	15.5068	-0.017472	14.7493
-0.31611	20.421	-0.01104	10.9414	-0.010249	9.43134	-0.0183959	12.5268	-0.025102	15.5252	-0.017536	14.8452
-0.31421	18.4316	-0.011032	10.9012	-0.0104612	9.72331	-0.0182898	12.3432	-0.0253796	15.5788	-0.017704	14.9813
-0.31662	19.5368	-0.010992	10.76	-0.0107224	10.1653	-0.0183633	13.2892	-0.0256653	15.6547	-0.017864	14.9684
-0.3203	21.2316	-0.010984	10.7742	-0.0109755	10.4097	-0.0186776	13.537	-0.025902	15.6772	-0.017992	14.9139
-0.32382	22.8526	-0.011024	11.0088	-0.0112163	10.5147	-0.0188163	13.6116	-0.0261429	15.81	-0.018032	14.8427
-0.32622	23.9579	-0.011048	11.2291	-0.0112939	10.3912	-0.0189061	13.7007	-0.0263918	15.8298	-0.018096	14.9049
-0.3291	25.2842	-0.011048	11.1396	-0.0114735	10.6443	-0.0190327	13.9484	-0.0266286	15.8614	-0.018216	15.0797
-0.3307	26.021	-0.01108	10.8105	-0.0117592	10.9905	-0.0193184	14.3277	-0.0268612	15.8949	-0.01832	15.1947
-0.33358	27.3474	-0.011016	10.5837	-0.0120041	11.2238	-0.0195102	14.327	-0.0270939	15.9186	-0.01844	15.2116
-0.33791	29.3368	-0.010968	10.5021	-0.0122286	11.2153	-0.0196408	14.4036	-0.0272857	15.9654	-0.018576	15.1909
-0.34125	29.9263	-0.010984	10.4891	-0.0123755	10.7296	-0.0198898	14.6184	-0.0275102	15.9852	-0.01868	15.2423
-0.34351	30.221	-0.011024	10.4787	-0.0124204	10.7699	-0.0201551	14.4136	-0.0277184	16.0262	-0.018752	15.3249
-0.34746	30.7368	-0.011024	10.4891	-0.0125959	11.2753	-0.0202163	13.8646	-0.0279673	16.0817	-0.01888	15.4026
-0.35153	31.179	-0.010944	10.471	-0.012849	11.9102	-0.0204694	13.8191	-0.0282286	16.0983	-0.018984	15.3731
-0.35968	31.621	-0.010976	10.4736	-0.0131143	12.3635	-0.0207429	13.2106	-0.0285061	16.1558	-0.019104	15.32
-0.36512	31.9158	-0.011024	10.4476	-0.0133796	12.5028	-0.0206939	13.087	-0.0287429	16.2814	-0.019168	15.2992
-0.37192	32.2842	-0.011032	10.3569	-0.0135265	12.487	-0.0208082	14.2729	-0.0289633	16.3283	-0.01924	15.3742
-0.37735	32.579	-0.01108	10.1302	-0.0137061	12.6144	-0.0213551	14.9435	-0.0291755	16.4361	-0.019376	15.439
-0.38281	32.8	-0.011088	9.77294	-0.0139306	12.7955	-0.0215633	14.257	-0.0293878	16.5234	-0.01952	15.4506
-0.39417	33.1684	-0.011088	9.2615	-0.0141551	12.9831	-0.0213878	13.8098	-0.0296163	16.6404	-0.01964	15.4078
-0.40099	33.3895	-0.011072	8.68373	-0.0144163	13.1047	-0.0214286	14.4281	-0.0298408	16.6946	-0.019736	15.492
-0.40554	33.5368	-0.011032	8.14766	-0.0145592	13.1219	-0.0218408	14.9216	-0.0301143	16.8361	-0.019832	15.6074
-0.41008	33.6842	-0.010992	7.71787	-0.0147224	13.2541	-0.0220612	14.5781	-0.0303592	16.8996	-0.019992	15.5828
-0.4169	33.9053	-0.011	7.50034	-0.0149265	13.4867	-0.0221184	14.074	-0.0305959	17.0536	-0.020056	15.5089
-0.42911	34.2737	-0.011016	7.45886	-0.0151388	13.7635	-0.0221878	14.2444	-0.0308082	17.0913	-0.02008	15.5646
-0.44052	34.5684	-0.011048	7.30982	-0.0153673	14.1104	-0.0224898	14.9673	-0.0310286	17.2062	-0.020192	15.7616
-0.44908	34.7895	-0.011088	6.96379	-0.0156367	14.2663	-0.0227918	14.8853	-0.031249	17.2662	-0.020336	15.8355
-0.46334	35.1579	-0.011048	6.5339	-0.0157102	14.2683	-0.0229878	14.2676	-0.0314735	17.3725	-0.02048	15.7642
-0.4776	35.5263	-0.011032	6.16243	-0.0158286	14.1309	-0.0229143	14.1546	-0.031698	17.4656	-0.020552	15.5052
-0.49187	35.8947	-0.011	5.81803	-0.0158939	13.6539	-0.023	14.8351	-0.0319347	17.5625	-0.020584	15.2658
-0.5204	36.6316	-0.011	5.50699	-0.0159184	12.7501	-0.023351	15.1158	-0.0321878	17.6695	-0.020656	15.2282
-0.53034	36.9263	-0.01096	5.29574	-0.0158776	11.51	-0.0235551	14.8159	-0.0324286	17.6939	-0.02072	15.3198
-0.54442	37.3684	-0.011	5.22187	-0.0157633	10.5156	-0.0235347	14.4572	-0.0326653	17.7593	-0.020792	15.5167
-0.55681	37.7368	-0.011072	5.20114	-0.0156327	10.6385	-0.0235959	14.7696	-0.0329143	17.803	-0.02088	15.7487
-0.56446	37.9579	-0.011096	5.0508	-0.015702	11.5305	-0.0239469	15.5115	-0.0332082	17.9081	-0.021016	15.921
-0.57466	38.2526	-0.011032	4.77653	-0.0158816	12.2618	-0.0242327	15.3458	-0.0334776	17.959	-0.021144	15.9703
-0.57976	38.4	-0.011016	4.52688	-0.0159959	12.5075	-0.0243633	14.6494	-0.0337306	18.1144	-0.021256	15.8238
-0.58231	38.4737	-0.010944	4.37419	-0.0160898	12.1811	-0.0243306	14.726	-0.0340041	18.1904	-0.021352	15.4134
-0.5839	37.4421	-0.010976	4.38845	-0.0160408	11.0229	-0.0245714	15.7554	-0.0342612	18.2784	-0.021344	14.9304
-0.58594	36.1158	-0.010952	4.55539	-0.0158449	10.0179	-0.0249143	15.8644	-0.0344612	18.3458	-0.021288	14.7455
-0.58991	33.5368	-0.010968	4.85299	-0.0156694	10.152	-0.0250367	15.5988	-0.0347102	18.4113	-0.021344	14.8906
-0.5923	31.9895	-0.010968	5.24654	-0.0157102	11.0664	-0.0250367	15.4396	-0.0349102	18.4457	-0.02148	15.31
-0.59423	30.7368	-0.011032	5.63918	-0.0158612	12.0773	-0.0251388	15.7369	-0.0351429	18.5362	-0.021616	15.6335
-0.59672	29.1158	-0.011136	5.73898	-0.0160122	12.4737	-0.0254163	16.027	-0.0353959	18.4522	-0.021792	15.7901
-0.59933	27.421	-0.011144	5.45645	-0.016102	12.0687	-0.0256571	15.809	-0.0356163	18.468	-0.021864	15.8744
-0.60206	25.6526	-0.011104	4.90867	-0.0160735	10.9073	-0.0258163	15.2164	-0.0358612	18.5353	-0.021976	15.9482
-0.60422	24.2526	-0.011104	4.28318	-0.0159143	9.53111	-0.0257918	15.3591	-0.0361224	18.5545	-0.022056	15.8433
-0.60422	26.7579	-0.010984	3.79358	-0.0156612	8.72574	-0.0261388	16.4974	-0.0363306	18.5526	-0.022112	15.5931
-0.60422	28.7474	-0.010864	3.60307	-0.0155633	9.21005	-0.026498	16.4332	-0.036551	18.7271	-0.022136	15.5141
-0.60422	31.4	-0.010736	3.80136	-0.0156571	10.3986	-0.0266694	15.5935	-0.0367959	18.776	-0.022208	15.5841
-0.60422	33.3158	-0.0108	4.46318	-0.0158286	11.5172	-0.0265796	15.357	-0.0370204	18.7845	-0.022256	15.7072
-0.60422	35.4526	-0.01088	5.53291	-0.0159918	11.9208	-0.0266816	16.0759	-0.0372653	18.7944	-0.022344	15.8757
-0.60423	36.8526	-0.011016	6.69336	-0.0160694	11.5231	-0.0270408	16.2866	-0.0375224	18.8557	-0.022464	15.9003
-0.60423	37.6632	-0.011112	7.5817	-0.0160327	10.3754	-0.0272082	16.0071	-0.0377673	18.8643	-0.022584	15.7811
-0.60423	38.1053	-0.01116	8.06203	-0.0159224	8.97938	-0.0272939	15.8644	-0.0380204	18.8531	-0.022624	15.7655
-0.60454	38.5474	-0.011176	8.04523	-0.0157265	7.99229	-0.0274571	15.9753	-0.0382694	18.8485	-0.022736	15.8407
-0.61592	38.8421	-0.011072	7.55842	-0.0155796	8.10066	-0.0276449	16.1788	-0.0384857	18.8868	-0.022856	15.9379
-0.62729	39.1368	-0.010976	6.90946	-0.0155959	9.06852	-0.0278367	16.1841	-0.0387347	18.9053	-0.02296	16.0027
-0.63582	39.3579	-0.010904	6.42523	-0.015698	10.3523	-0.0280245	15.8095	-0.0389633	18.7434	-0.023056	15.912
-0.64719	39.6526	-0.010912	6.31651	-0.0158571	11.459	-0.0280286	15.7421	-0.0391878	18.7302	-0.02312	15.5842
-0.65853	39.8737	-0.010872	6.55594	-0.0160367	11.7391	-0.028102	16.3591	-0.0394367	18.8351	-0.023136	15.3548
-0.67465	40.0948	-0.010872	7.22803	-0.0160898	11.0705	-0.0285673	16.889	-0.0396735	18.7843	-0.02316	15.36
-0.69075	40.3156	-0.010912	8.20085	-0.0159959	9.78749	-0.0287796	16.6083	-0.039902	18.8642	-0.023232	15.5815
-0.70627	40.5368	-0.011024	9.15912	-0.0158327	8.51493	-0.0288408	16.3552	-0.0401306	19.0399	-0.023312	15.8148
-0.73044	40.9052	-0.011144	9.66917	-0.0156245	8.06633	-0.0289306	16.5892	-0.0403878	19.0261	-0.0234	15.9599
-0.75461	41.2736	-0.0112	9.64848	-0.0155673	8.81623	-0.0292694	17.349	-0.0406122	19.0499	-0.023592	16.0649
-0.78188	41.642	-0.011112	9.05539	-0.0157224	10.0226	-0.0295388	17.2023	-0.040849	19.1086	-0.023728	16.0908
-0.82005	42.0104	-0.01096	8.50613	-0.0159592	10.8584	-0.0296816	16.5383	-0.0410857	19.1317	-0.023824	15.9768
-0.84296	42.2316	-0.010824	8.6124	-0.0160816	10.8756	-0.0296776	16.4954	-0.0413388	19.2381	-0.023864	15.8277
-0.86587	42.4528	-0.010824	9.34814	-0.0161102	10.0147	-0.029849	17.3054	-0.0415673	19.3517	-0.023928	15.8329
-0.88874	42.6736	-0.01092	10.2756	-0.0159714	8.71971	-0.0301918	17.524	-0.0417837	19.4046	-0.024016	15.8653
-0.91166	42.8948	-0.011112	10.8883	-0.0157265	8.03194	-0.0303796	17.125	-0.0420408	19.472	-0.024088	15.7655
-0.95355	43.1896	-0.011248	10.9583	-0.0156163	8.5658	-0.0303551	16.8819	-0.0422612	19.5408	-0.024136	15.7266
-0.99867	43.4844	-0.011208	10.6667	-0.0157143	9.73851	-0.0304367	17.3397	-0.0425143	19.5242	-0.024192	15.7966
-1.03248	43.7052	-0.011072	10.1524	-0.0159143	10.6713	-0.0308	17.9303	-0.0427265	19.593	-0.024256	15.9534
-1.05507	43.8528	-0.010992	9.72653	-0.0160286	10.9191	-0.0310163	17.6059	-0.0429878	19.6433	-0.024312	16.1297
-1.08893	44.0736	-0.010928	9.62698	-0.0160735	10.3185	-0.031098	17.0648	-0.0432204	19.7405	-0.024456	16.3668
-1.12452	44.2948	-0.010912	10.1371	-0.0159755	9.14045	-0.0311633	17.2835	-0.043502	19.7424	-0.024624	16.4187
-1.13636	44.3684	-0.01096	10.8725	-0.0157755	8.50029	-0.0314449	18.2309	-0.0437224	19.9064	-0.024824	16.2891
-1.16004	44.5156	-0.011048	11.4254	-0.0156816	9.06982	-0.0317878	18.0373	-0.0440082	19.9778	-0.02488	15.9625
-1.18378	44.6632	-0.011128	11.5353	-0.015751	10.1983	-0.0318857	17.1203	-0.0442776	20.0611	-0.024904	15.5906
-1.19563	44.7368	-0.01112	11.226	-0.0159469	11.1492	-0.0317878	17.1342	-0.0445388	20.1278	-0.024944	15.2321
-1.20747	44.8104	-0.011072	10.5411	-0.0160367	11.4148	-0.0320286	18.4232	-0.044751	20.2447	-0.025	15.0551
-1.21792	44.8104	-0.011032	9.71347	-0.0160571	10.8241	-0.032502	18.4172	-0.0450041	20.3028	-0.024968	15.1068
-1.29503	44.2212	-0.010976	9.04262	-0.015898	9.68109	-0.0326122	17.4381	-0.0451959	20.3932	-0.025024	15.4627
-1.31108	43.558	-0.010928	8.76014	-0.0156776	9.07587	-0.0325469	17.3549	-0.0454245	20.5114	-0.02512	16.0234
-1.32489	42.3788	-0.010904	8.7433	-0.0155755	9.62219	-0.0327714	18.2878	-0.0456531	20.5384	-0.025336	16.4511
-1.34066	38.9895	-0.010928	8.83013	-0.0157102	10.8907	-0.0332	18.3585	-0.0459061	20.6362	-0.025504	16.4602
-1.34872	36.8526	-0.010984	8.8729	-0.015951	12.1037	-0.0333796	17.5511	-0.0461388	20.726	-0.025648	16.0519
-1.35347	35.1579	-0.011	9.02453	-0.0162122	12.8926	-0.0333061	17.3628	-0.0464449	20.8066	-0.025624	15.5649
-1.35347	33.7579	-0.01104	9.28632	-0.0164367	13.1384	-0.0334	17.9753	-0.0466735	20.8516	-0.025584	15.2024
-1.35347	31.9895	-0.011096	9.40296	-0.016551	13.3551	-0.0337633	18.4119	-0.0469102	21.0306	-0.025576	15.3086
-1.35347	30.6632	-0.011088	9.20986	-0.016751	13.5607	-0.0339347	18.1702	-0.0471551	21.0082	-0.025672	15.9056
-1.35347	29.6316	-0.011056	8.80037	-0.016951	13.9413	-0.0340286	17.9772	-0.0474327	21.0961	-0.025888	16.3591
-1.35007	39.8737	-0.011072	8.19043	-0.0171837	14.4565	-0.0341714	18.1021	-0.0476531	21.1338	-0.026024	16.42
-1.34842	40.9052	-0.011104	7.50662	-0.0174408	14.8048	-0.0343184	18.4939	-0.0479224	21.227	-0.026088	16.3967
-1.35169	41.0528	-0.01104	7.02989	-0.0176367	14.8663	-0.0345714	18.4867	-0.0481673	21.2561	-0.026168	16.4394
-1.40308	40.5368	-0.010936	6.70848	-0.0178204	15.0644	-0.034751	17.9793	-0.0484245	21.4022	-0.026224	16.4226
-1.46913	39.8737	-0.010936	6.50251	-0.0180204	15.33	-0.0347143	17.9311	-0.0486531	21.4175	-0.026272	16.2476
-1.5208	39.1368	-0.010968	6.46363	-0.0182204	15.6419	-0.0348816	19.0284	-0.0489224	21.537	-0.026304	16.2036
-1.56542	38.2526	-0.011064	6.49723	-0.0184367	15.6346	-0.0354082	19.4301	-0.0491633	21.4828	-0.026352	16.2943
-1.61649	36.5579	-0.011128	6.47659	-0.0185673	15.4628	-0.0356286	18.708	-0.0494367	21.5574	-0.0264	16.42
-1.63071	35.821	-0.01108	6.29045	-0.0187837	15.5679	-0.0355551	18.2819	-0.0496531	21.566	-0.026512	16.6063
-1.7646	35.728	-0.011032	5.93194	-0.0189959	15.6142	-0.0356857	19.2042	-0.0498898	21.6401	-0.026664	16.7462
-1.76928	34.1263	-0.010984	5.56013	-0.0191959	15.8323	-0.0361633	19.4817	-0.050098	21.6619	-0.026832	16.6868
-1.77421	32.6526	-0.010904	5.33981	-0.019502	16.5252	-0.0364	18.4814	-0.0503388	21.726	-0.026944	16.6027
-1.77915	31.179	-0.010896	5.33462	-0.0198653	16.8556	-0.0361755	18.0103	-0.0505755	21.7366	-0.026984	16.6105
-1.78433	29.6316	-0.01088	5.4733	-0.0200531	16.7822	-0.0363265	19.438	-0.050849	21.7841	-0.027048	16.6351
-1.78852	28.0842	-0.010952	5.82566	-0.0201878	16.9091	-0.0368245	19.8767	-0.0511388	21.8197	-0.027112	16.7203
-1.78852	26.6842	-0.010992	6.3384	-0.0204367	17.0782	-0.0370327	18.9855	-0.0513796	21.8158	-0.027208	16.7888
-1.78852	25.2105	-0.011064	6.8304	-0.0206	17.104	-0.0368612	18.7351	-0.0516327	21.9168	-0.027248	16.6763
-1.78852	23.3684	-0.011176	6.98323	-0.0207959	17.2089	-0.0371061	19.8999	-0.0518449	21.9168	-0.027272	16.6867
-1.78852	21.6737	-0.011184	6.83938	-0.0210082	17.4638	-0.0375796	19.9078	-0.0520571	21.9425	-0.027368	16.7977
-1.78852	19.0947	-0.011128	6.4549	-0.0212776	17.5801	-0.0377837	18.8024	-0.0522612	21.9293	-0.027488	16.8418
-1.78334	15.4842	-0.011048	5.91754	-0.0214449	17.6059	-0.0375918	18.7766	-0.0525102	21.9729	-0.027584	16.8482
-1.76025	12.3158	-0.011016	5.3761	-0.0216082	17.7229	-0.0380367	20.2578	-0.052751	21.961	-0.027664	17.0475
-1.7496	10.4	-0.010936	5.05858	-0.0217918	17.8354	-0.038498	20.0352	-0.0529918	22.0032	-0.027808	17.1977
-1.73601	8.33684	-0.01088	5.02099	-0.0219796	17.8182	-0.0385347	18.8506	-0.0532857	22.029	-0.02796	17.2353
-1.71851	6.78948	-0.010872	5.36184	-0.0221429	17.8182	-0.0383918	19.0059	-0.0535347	22.0198	-0.028008	17.1601
-1.70101	5.24212	-0.010872	6.1571	-0.0223265	17.9107	-0.0387796	20.1224	-0.0537551	22.0482	-0.028096	17.1873
-1.69268	4.50528	-0.010912	7.25016	-0.0225388	17.9987	-0.0390694	19.6197	-0.0540367	22.1129	-0.028184	17.1899
-1.68198	3.69474	-0.011	8.34715	-0.022751	17.9425	-0.0390612	18.5923	-0.0543265	22.1492	-0.028272	17.1562
-1.67507	3.17895	-0.011064	9.15931	-0.0229102	17.8995	-0.0390245	19.3085	-0.0545306	22.1683	-0.028344	17.1731
-1.66718	2.58947	-0.011168	9.58699	-0.0230612	17.9028	-0.0395429	20.5175	-0.0548082	22.342	-0.028464	17.1938
-1.66126	2.14737	-0.01116	9.62069	-0.0232531	17.9832	-0.0398857	19.8879	-0.0551184	22.3275	-0.028552	17.2677
-1.65337	1.5579	-0.011088	9.38093	-0.0234286	18.0228	-0.0398082	18.9828	-0.0553796	22.424	-0.028656	17.4504
-1.64745	1.11579	-0.011048	9.066	-0.0235633	18.2045	-0.0398327	19.9276	-0.0556286	22.4755	-0.028856	17.6137
-1.63867	0.673684	-0.01096	8.84568	-0.0237306	18.4259	-0.0404204	20.6365	-0.0558857	22.5622	-0.029016	17.5204
-1.62658	0.305263	-0.010912	8.85605	-0.0239306	18.5844	-0.0406286	19.5239	-0.0561143	22.5965	-0.029088	17.2095
-1.62175	0.157895	-0.01092	9.32227	-0.0241224	18.5712	-0.0404571	18.9987	-0.0563429	22.7017	-0.02908	16.9816
		-0.010968	9.95942	-0.0243061	18.4814	-0.0406531	20.5401	-0.0565347	22.7976	-0.029096	17.0438
		-0.011024	10.5293	-0.0244531	18.4444	-0.0411633	21.0178	-0.0567592	22.8571	-0.029176	17.4854
		-0.011016	10.896	-0.0246204	18.5521	-0.0412735	20.0908	-0.0570041	22.9787	-0.029352	17.7809
		-0.011072	11.172	-0.0248857	18.5211	-0.0412163	19.8741	-0.0572449	23.0329	-0.02956	17.8768
		-0.011144	11.3997	-0.0250776	18.3288	-0.0413469	20.8083	-0.0574857	23.0971	-0.029736	17.7692
		-0.01112	11.4075	-0.0252653	18.1953	-0.0417388	20.8301	-0.0577224	23.1624	-0.029776	17.6331
		-0.011072	11.2095	-0.025449	18.1999	-0.0419551	19.9025	-0.0579673	23.2826	-0.029832	17.5243
		-0.010944	11.0606	-0.0256204	18.2429	-0.0418612	19.6105	-0.0582286	23.3241	-0.029888	17.6215
		-0.010888	11.2146	-0.0257673	18.332	-0.0420286	20.8466	-0.0584449	23.4218	-0.029992	17.7705
		-0.010936	11.5951	-0.0259143	18.1603	-0.0426041	21.0428	-0.0586898	23.5334	-0.03012	17.8884
		-0.011016	11.9355	-0.0259755	17.5604	-0.0427592	19.9526	-0.0589143	23.6047	-0.0302	17.8949
		-0.011104	11.8747	-0.0260163	16.5496	-0.0426408	19.7062	-0.0591714	23.6801	-0.03024	17.939
		-0.011096	11.3633	-0.0259837	15.3425	-0.0427714	20.7923	-0.0593918	23.7989	-0.030328	18.0906
		-0.011056	10.603	-0.0258	14.3515	-0.0432122	21.0566	-0.059649	23.9113	-0.03052	18.3018
		-0.010992	10.1016	-0.0256776	14.5371	-0.043351	20.3305	-0.0598735	24.0131	-0.030704	18.3057
		-0.010976	9.98885	-0.0257224	15.4898	-0.0432857	20.1785	-0.0601592	24.1056	-0.030816	18.1217
		-0.010984	10.0627	-0.0258735	16.3256	-0.0434	21.313	-0.0603918	24.1644	-0.030848	17.8768
		-0.010936	10.2973	-0.0259673	16.5614	-0.0439306	21.6928	-0.0606367	24.2259	-0.030856	17.8716
		-0.010936	10.8673	-0.0260286	16.2232	-0.0441429	20.7276	-0.0608367	24.3059	-0.03096	18.1939
		-0.011008	11.5356	-0.0260327	15.1378	-0.0440653	20.2942	-0.0611102	24.3648	-0.031096	18.4448
		-0.01104	11.8694	-0.0258857	13.8785	-0.0441796	21.4325	-0.0613184	24.419	-0.031224	18.5069
		-0.011112	11.7543	-0.0256939	13.494	-0.0447143	21.7939	-0.0615633	24.5142	-0.031344	18.4812
		-0.011088	11.3025	-0.0256857	14.2393	-0.0448939	20.795	-0.0617878	24.5545	-0.031464	18.4166
		-0.011072	10.58	-0.0257878	15.3671	-0.0447551	20.4786	-0.0620408	24.5823	-0.031528	18.2978
		-0.011016	9.79766	-0.0259265	16.1103	-0.0449224	21.8138	-0.0622735	24.6609	-0.0316	18.2992
		-0.010984	9.15014	-0.0260204	16.1367	-0.045502	22.0437	-0.0625265	24.7263	-0.031672	18.4776
		-0.010968	8.63962	-0.0260327	15.3294	-0.0456327	20.8228	-0.0627714	24.7355	-0.031768	18.678
		-0.01096	8.30914	-0.0259184	14.0952	-0.0455061	20.5487	-0.0630204	24.7963	-0.03196	18.7466
		-0.010984	8.20286	-0.0257347	13.1735	-0.0456735	21.6863	-0.0632939	24.8471	-0.03208	18.5772
		-0.011072	8.18616	-0.0256204	13.3492	-0.0461429	21.8132	-0.0635265	24.8663	-0.032136	18.4464
		-0.011112	7.97021	-0.0256408	14.3409	-0.0462245	20.8334	-0.0637592	24.9191	-0.032176	18.6145
		-0.011128	7.57282	-0.0257551	15.5004	-0.0461714	20.8724	-0.0640327	24.9666	-0.032336	18.8048
		-0.01108	7.11154	-0.0259102	16.2403	-0.0464245	22.3046	-0.0642816	24.9889	-0.032464	18.8411
		-0.011056	6.70334	-0.0260204	16.138	-0.0469592	22.2696	-0.0645184	25.0101	-0.032568	18.7763
		-0.010976	6.40963	-0.0260041	15.1655	-0.0470163	20.9918	-0.0647755	25.0536	-0.032624	18.8191
		-0.010944	6.31003	-0.0258939	13.9921	-0.0468857	21.4133	-0.0650408	25.0562	-0.03276	18.9577
		-0.010968	6.33715	-0.0257469	13.2739	-0.0473388	22.8925	-0.0652816	25.1176	-0.032936	18.9616
		-0.011024	6.31776	-0.0256327	13.6023	-0.0478	22.4248	-0.0655184	25.1487	-0.03304	18.8605
		-0.011064	6.07066	-0.0256694	14.6898	-0.0477429	21.3684	-0.0657673	25.2035	-0.033072	18.74
		-0.011072	5.71435	-0.0257796	15.9287	-0.0477143	22.1282	-0.0660163	25.162	-0.033128	18.8281
		-0.010968	5.40461	-0.0259347	16.7327	-0.0482286	23.0544	-0.0662531	25.1818	-0.033216	19.1236
		-0.010912	5.31389	-0.0260367	16.588	-0.0484939	22.3575	-0.0664531	25.2445	-0.033384	19.2325
		-0.01092	5.41368	-0.0259714	15.601	-0.0484286	21.5448	-0.066698	25.2828	-0.033544	19.1599
		-0.01096	5.56142	-0.025849	14.5293	-0.0484612	22.2994	-0.0669429	25.2914	-0.03364	19.0679
		-0.011048	5.58216	-0.0256898	14.0853	-0.0489755	23.0875	-0.0672122	25.3752	-0.033752	19.0342
		-0.011072	5.5044	-0.0256122	14.5055	-0.0492327	22.3053	-0.0674449	25.3964	-0.033816	18.9668
		-0.011144	5.37091	-0.0256408	15.589	-0.0491959	21.5621	-0.0676816	25.4129	-0.03388	19.0342
		-0.011136	5.09496	-0.0258041	16.6725	-0.0492571	22.0734	-0.0678898	25.3879	-0.033984	19.296
		-0.011088	4.77792	-0.0259469	17.0213	-0.0495959	22.88	-0.0680816	25.4646	-0.03416	19.3478
		-0.010984	4.61246	-0.0259959	16.383	-0.0498327	22.7169	-0.0682939	25.4851	-0.034264	19.1301
		-0.01096	4.66786	-0.0259388	15.3073	-0.0499388	22.4632	-0.0685429	25.5737	-0.034288	18.8839
		-0.010992	4.88899	-0.0257837	14.389	-0.0500327	22.5867	-0.0688041	25.5637	-0.03432	18.9046
		-0.010992	5.2465	-0.025649	14.3665	-0.0501837	23.0393	-0.0690816	25.6973	-0.034456	19.2092
		-0.011056	5.72602	-0.0256531	15.2346	-0.0504612	23.0374	-0.0693551	25.7098	-0.034632	19.3841
		-0.011088	6.1379	-0.0257878	16.2746	-0.0506	22.3469	-0.0695796	25.8136	-0.0348	19.4282
		-0.011104	6.25066	-0.0259061	16.8112	-0.0505224	22.1362	-0.0698286	25.8269	-0.034904	19.4217
		-0.01112	5.97874	-0.0260163	16.6672	-0.0506531	23.1701	-0.0700531	25.9637	-0.034992	19.4269
		-0.01112	5.48496	-0.0260163	15.7455	-0.0511633	23.5566	-0.0702776	25.9948	-0.03508	19.2921
		-0.011072	4.96296	-0.0258816	14.5867	-0.0513633	22.5537	-0.0705388	26.1323	-0.035104	19.2105
		-0.011032	4.63296	-0.0257061	13.9392	-0.0512449	22.1494	-0.0708041	26.2162	-0.035176	19.3971
		-0.010856	4.56187	-0.0256041	14.372	-0.0513918	23.0961	-0.0710571	26.3423	-0.035296	19.5876
		-0.010776	4.97352	-0.0256408	15.4719	-0.051849	23.4225	-0.0713184	26.4195	-0.03544	19.5928
		-0.010816	5.91869	-0.0257918	16.6275	-0.0520857	22.5637	-0.0715959	26.5007	-0.035552	19.5435
		-0.010936	7.06502	-0.0259347	17.2585	-0.0520286	22.1997	-0.0718204	26.5805	-0.035688	19.55
		-0.011032	8.10883	-0.0260367	17.1177	-0.0521673	23.1101	-0.0720571	26.5976	-0.03576	19.515
		-0.01112	8.72136	-0.0260531	16.1828	-0.0526286	23.6142	-0.0722776	26.6353	-0.035832	19.5656
		-0.011128	8.87938	-0.0259306	15.0253	-0.0528571	23.1002	-0.0725347	26.6882	-0.035952	19.6446
		-0.01104	8.73422	-0.0257184	14.5542	-0.052849	22.7024	-0.0727714	26.7727	-0.036064	19.7146
		-0.010952	8.61758	-0.0256531	15.1482	-0.0529184	23.2567	-0.0730286	26.7992	-0.036144	19.7366
		-0.010928	8.75107	-0.0257429	16.1644	-0.0533224	23.8447	-0.0732163	26.8408	-0.036208	19.747
		-0.01092	9.16306	-0.0258776	16.9315	-0.0535224	23.2646	-0.0734694	26.9082	-0.036312	19.7833
		-0.010992	9.65506	-0.0259592	17.131	-0.0534776	22.5233	-0.0737102	27.022	-0.036464	19.7677
		-0.011096	9.92414	-0.0260408	16.4988	-0.0534735	23.2224	-0.0740122	27.0729	-0.036576	19.7055
		-0.011064	9.88166	-0.0259796	15.2811	-0.0539592	24.2114	-0.0742408	27.1634	-0.036728	19.6265
		-0.011032	9.69941	-0.0257918	14.3291	-0.0542286	23.7443	-0.0745265	27.3174	-0.0368	19.5552
		-0.011	9.61162	-0.0256531	14.4698	-0.054302	23.071	-0.0747673	27.3994	-0.036864	19.5928
		-0.010992	9.64915	-0.0256898	15.4489	-0.0543429	23.4047	-0.0749959	27.4391	-0.036936	19.8258
		-0.010976	9.87418	-0.0258082	16.6057	-0.0546939	24.169	-0.0752531	27.5382	-0.037096	20.0159
		-0.011016	10.1835	-0.0259592	17.5347	-0.0549265	23.9377	-0.075498	27.5614	-0.037232	19.9693
		-0.011072	10.296	-0.0260694	17.5902	-0.0550204	23.2229	-0.0757224	27.6202	-0.037328	19.8026
		-0.011088	10.0384	-0.0260653	16.6691	-0.0549755	23.5044	-0.0759837	27.5858	-0.037416	19.7081
		-0.01104	9.66691	-0.0259347	15.4964	-0.0552735	24.65	-0.0762367	27.6453	-0.03748	19.6019
		-0.011016	9.42499	-0.0257592	14.8285	-0.0556694	24.1235	-0.0764163	27.6162	-0.03756	19.5617
		-0.010976	9.37315	-0.0256327	14.9197	-0.0556367	22.8874	-0.0767102	27.6883	-0.037656	19.7028
		-0.010936	9.47424	-0.0256449	15.8697	-0.0555224	23.4761	-0.0769755	27.6968	-0.037808	19.9706
		-0.01096	9.57403	-0.0257796	17.1409	-0.0559918	24.6976	-0.0772245	27.7649	-0.037976	20.0521
		-0.011024	9.57144	-0.0259469	17.8227	-0.0564	23.9603	-0.0774776	27.7564	-0.038072	19.8775
		-0.01104	9.51442	-0.0260694	17.4633	-0.0562531	23.151	-0.0777347	27.8013	-0.038144	19.6965
		-0.010992	9.45221	-0.0260531	16.3764	-0.0563469	24.3105	-0.0779918	27.8125	-0.038184	19.7625
		-0.011072	9.41203	-0.025951	15.0696	-0.056898	24.8892	-0.0782327	27.7901	-0.038248	19.9525
		-0.01116	9.28114	-0.0257673	13.834	-0.057102	23.7159	-0.0784571	27.8323	-0.038424	20.0043
		-0.011152	9.0025	-0.0256	13.5103	-0.0569347	23.2667	-0.0786857	27.8501	-0.038568	19.8362
		-0.011136	8.42486	-0.0255347	14.2384	-0.0572204	24.7373	-0.0789469	27.8363	-0.0386	19.7922
		-0.011024	7.59072	-0.0255959	15.4362	-0.0577306	24.6514	-0.0791878	27.8758	-0.038696	20.0717
		-0.010976	6.75941	-0.0257592	16.4815	-0.0577714	23.4186	-0.0794327	27.8467	-0.038872	20.241
		-0.010968	6.19742	-0.0258612	16.6771	-0.057649	23.8665	-0.0796898	27.848	-0.039072	20.0522
		-0.01096	5.88413	-0.025902	16.0495	-0.0581837	25.1363	-0.0799551	27.8916	-0.039128	19.6289
		-0.010936	5.64048	-0.0258571	14.9581	-0.0584653	23.8916	-0.0801918	27.848	-0.039144	19.4697
		-0.010888	5.43312	-0.0257633	14.09	-0.0582571	23.2454	-0.0803796	27.8487	-0.039176	19.6833
		-0.010936	5.39035	-0.0256694	14.1349	-0.0584571	24.8238	-0.0806449	27.8969	-0.039352	20.0988
		-0.011056	5.3761	-0.0257714	14.9271	-0.0589837	25.4924	-0.080898	27.9352	-0.039536	20.32
		-0.011064	5.19466	-0.0258408	15.1794	-0.0591429	24.7723	-0.0811265	27.8976	-0.039712	20.3238
		-0.011064	4.84766	-0.0258571	14.954	-0.0591347	24.6778	-0.0813592	27.9828	-0.039824	20.1854
		-0.011024	4.48267	-0.0258204	14.506	-0.0593673	25.3695	-0.0816245	28.0263	-0.03988	19.9293
		-0.010976	4.19146	-0.0257918	14.2404	-0.0596571	25.2863	-0.0818408	28.1101	-0.039904	19.7924
		-0.010936	4.00354	-0.0257755	14.2166	-0.0598694	24.5483	-0.0820612	28.1148	-0.039984	19.9592
		-0.010952	3.85709	-0.025849	14.2754	-0.0597837	24.0857	-0.0822939	28.2092	-0.040088	20.2166
		-0.01096	3.78062	-0.0258857	14.1697	-0.0599143	25.1058	-0.0825102	28.2164	-0.040232	20.3783
		-0.010928	3.84672	-0.0258735	13.9577	-0.0603796	25.384	-0.0827551	28.2897	-0.04036	20.3472
		-0.010976	3.97114	-0.0258531	13.7562	-0.0605388	24.311	-0.0829551	28.3115	-0.040464	20.2551
		-0.011056	4.0139	-0.0258327	13.6941	-0.0603714	23.9959	-0.0832	28.406	-0.040512	20.0508
		-0.01112	3.97762	-0.0258571	13.7093	-0.0605878	25.3728	-0.0834367	28.3637	-0.040568	20.0353
		-0.011176	3.81821	-0.0258408	13.6412	-0.0610898	25.4997	-0.083698	28.482	-0.040664	20.315
		-0.01116	3.55901	-0.0258531	13.5659	-0.0611714	24.4042	-0.0839469	28.4854	-0.040848	20.5441
		-0.011048	3.31666	-0.0258612	13.5097	-0.0610204	24.6626	-0.0842163	28.57	-0.041056	20.4186
		-0.01096	3.1715	-0.025849	13.5058	-0.0613959	26.0777	-0.0844204	28.6354	-0.041128	20.0575
		-0.010904	3.1093	-0.0258449	13.6631	-0.0618204	25.6899	-0.0846449	28.8086	-0.041192	19.8234
		-0.010912	3.1728	-0.0258857	13.6756	-0.0617959	24.6309	-0.0848653	28.8562	-0.041224	19.8932
		-0.010936	3.35813	-0.0259061	13.3664	-0.0617306	25.4389	-0.0851061	28.9878	-0.04128	20.1714
		-0.010944	3.6912	-0.0258612	13.0585	-0.0622571	26.5284	-0.0853469	29.0466	-0.04144	20.548
		-0.010968	4.13962	-0.0258653	13.0915	-0.0625837	25.497	-0.0856163	29.1279	-0.04164	20.7502
		-0.01104	4.54867	-0.0258694	13.2515	-0.0624041	24.7835	-0.085902	29.2139	-0.041824	20.6362
		-0.011144	4.76203	-0.0258857	13.3598	-0.0625143	26.1002	-0.0861714	29.2582	-0.041888	20.2504
		-0.01112	4.79549	-0.0258816	13.2799	-0.0630204	26.597	-0.0864	29.3314	-0.041928	20.0573
		-0.011048	4.74365	-0.0258531	13.0639	-0.0631673	25.4164	-0.0866367	29.4312	-0.041992	20.2463
		-0.011016	4.71398	-0.0258041	13.0579	-0.0630449	25.316	-0.0868857	29.4536	-0.042088	20.5273
		-0.01104	4.67818	-0.0258408	13.3902	-0.0633224	26.5819	-0.0871265	29.544	-0.042192	20.7541
		-0.01104	4.64755	-0.0259102	13.6882	-0.0637714	26.4768	-0.0873918	29.6067	-0.04232	20.8176
		-0.011032	4.62168	-0.0259673	13.675	-0.0638449	25.3219	-0.0876612	29.6549	-0.042432	20.7839
		-0.01096	4.63694	-0.0258939	13.2865	-0.0638122	25.5135	-0.0879429	29.7228	-0.04252	20.5817
		-0.010904	4.79981	-0.0258776	13.3214	-0.0640857	26.7728	-0.0881959	29.7974	-0.042576	20.5053
		-0.010912	5.2439	-0.0258735	13.6267	-0.0644408	26.4874	-0.0884204	29.806	-0.042704	20.7372
		-0.010968	5.92915	-0.0258816	13.7562	-0.0645061	25.4838	-0.0886449	29.9209	-0.042848	20.955
		-0.011008	6.71794	-0.0258653	13.8664	-0.0644571	25.7983	-0.0889061	29.9394	-0.043024	20.8383
		-0.011056	7.41221	-0.0258816	14.1577	-0.0647755	27.008	-0.0890898	29.9824	-0.04308	20.5947
		-0.011112	7.86946	-0.0258653	14.2344	-0.0651796	26.3908	-0.0893429	30.0055	-0.043104	20.5752
		-0.011152	8.04014	-0.0258286	14.4458	-0.065151	25.3998	-0.0895878	30.0835	-0.043272	20.8513
		-0.011112	8.00909	-0.0258612	14.7101	-0.0651306	25.7943	-0.0898204	30.0782	-0.043416	20.9757
		-0.011064	7.84493	-0.0258571	14.8259	-0.0655469	26.8639	-0.0900571	30.1331	-0.04356	20.9744
		-0.010984	7.74398	-0.0258571	14.8041	-0.0658816	26.0407	-0.0903184	30.145	-0.04368	20.9744
		-0.010968	7.79712	-0.0258245	14.89	-0.0657429	25.3688	-0.0905673	30.1854	-0.043768	21.0457
		-0.010936	8.10379	-0.0258122	15.0664	-0.0657755	26.2779	-0.0908163	30.1655	-0.04388	21.1144
		-0.010936	8.58413	-0.0258449	15.2613	-0.0662449	27.3495	-0.0910816	30.2297	-0.044	21.1377
		-0.01096	9.02712	-0.0258571	15.291	-0.066498	26.3797	-0.0913429	30.2436	-0.044104	21.1662
		-0.01104	9.23189	-0.0258612	15.1305	-0.0663714	25.8908	-0.0915918	30.2918	-0.044192	21.1857
		-0.011136	9.17486	-0.0258653	15.1404	-0.0664939	26.9168	-0.0918245	30.3275	-0.044328	21.2077
		-0.011104	8.92862	-0.0258531	15.262	-0.0670367	27.3331	-0.0920857	30.346	-0.04444	21.231
		-0.01104	8.55163	-0.0258653	15.4106	-0.0671878	26.1056	-0.0923224	30.3659	-0.044584	21.2505
		-0.010984	8.21885	-0.0258653	15.412	-0.0670939	25.9457	-0.0925551	30.4221	-0.044704	21.2634
		-0.010952	8.15794	-0.0258408	15.3274	-0.0674367	27.3932	-0.0928204	30.4267	-0.044776	21.2764
		-0.010904	8.59042	-0.0258449	15.3162	-0.0679837	27.0734	-0.0930857	30.3884	-0.044816	21.2945
		-0.010928	9.22253	-0.0258286	15.3505	-0.0679347	25.797	-0.0933061	30.4307	-0.044896	21.3088
		-0.010968	9.70546	-0.0258327	15.4272	-0.067951	26.6459	-0.0935347	30.473	-0.044952	21.323
		-0.011072	9.76766	-0.0258694	15.4562	-0.0684327	27.7836	-0.0937714	30.4604	-0.045016	21.3386
		-0.011112	9.51154	-0.0258776	15.1332	-0.0686939	26.5759	-0.0939878	30.518	-0.04512	21.358
		-0.01112	8.91706	-0.0258204	14.8444	-0.0685347	26.2138	-0.0942082	30.5907	-0.0452	21.3762
		-0.011112	8.16974	-0.0257918	14.9448	-0.0688286	27.7511	-0.0944245	30.6343	-0.045248	21.3969
		-0.011048	7.27742	-0.0257959	15.3776	-0.0692408	27.9666	-0.0946408	30.6317	-0.045312	21.4112
		-0.011008	6.46286	-0.0258327	15.4569	-0.0694122	26.8587	-0.094849	30.6595	-0.04548	21.4267
		-0.010936	5.91125	-0.0258571	15.11	-0.0693837	26.856	-0.0950898	30.6667	-0.045648	21.4449
		-0.010888	5.71435	-0.0257918	14.5781	-0.0696735	27.8874	-0.095302	30.7315	-0.045696	21.4578
		-0.01088	5.79082	-0.0257633	14.3997	-0.0700449	27.4058	-0.0955633	30.7334	-0.045736	21.4708
		-0.010952	5.93078	-0.0258082	14.4948	-0.0700408	26.1743	-0.0958204	30.8107	-0.045808	21.4863
		-0.011024	5.98133	-0.0258449	14.4624	-0.0699959	26.8706	-0.0961061	30.8589	-0.04588	21.5045
		-0.01104	5.92301	-0.0258041	14.3157	-0.0704122	28.1886	-0.0963224	30.9157	-0.045968	21.5174
		-0.011048	5.79082	-0.0258122	14.2847	-0.0707959	27.7889	-0.0966122	30.9599	-0.046	21.5317
		-0.011024	5.51477	-0.0258245	14.175	-0.0708327	26.9776	-0.0968531	31.0781	-0.046008	21.5447
		-0.010968	5.17003	-0.0258449	14.1367	-0.0709429	27.4453	-0.0971102	31.1019	-0.046088	21.5666
		-0.010984	4.93286	-0.0258286	14.1063	-0.0713714	28.0367	-0.0973265	31.1791	-0.046208	21.5874
		-0.011008	4.86806	-0.0258653	13.9967	-0.0717265	27.2234	-0.0975878	31.2708	-0.046264	21.608
		-0.011072	4.86038	-0.0258694	13.6531	-0.0717388	26.2832	-0.0978	31.3838	-0.046296	21.6272
		-0.011096	4.70146	-0.0258816	13.4932	-0.071751	26.9095	-0.0980122	31.4175	-0.046336	21.6463
		-0.01108	4.46866	-0.0258776	13.5064	-0.0722082	27.9745	-0.0982531	31.5635	-0.046416	21.6565
		-0.011056	4.27829	-0.0259388	13.4913	-0.0724735	27.1903	-0.0985061	31.6316	-0.046552	21.6732
		-0.011056	4.09555	-0.0259306	13.3604	-0.0723673	26.6353	-0.0987633	31.703	-0.046664	21.6938
		-0.011016	3.89467	-0.025902	13.2183	-0.0724571	27.5755	-0.0990041	31.7354	-0.046768	21.7145
		-0.010984	3.83117	-0.0258612	13.1575	-0.0729388	28.3802	-0.0992735	31.8452	-0.046816	21.7288
		-0.010984	3.89338	-0.0258612	13.0082	-0.0731959	27.5451	-0.0994816	31.8961	-0.046848	21.7392
		-0.011	3.99706	-0.025849	12.8648	-0.0731061	26.9775	-0.0997673	31.9939	-0.046856	21.7573
		-0.01104	4.0476	-0.0258408	12.8125	-0.0732245	28.0637	-0.1	32.0554	-0.046904	21.7716
		-0.011096	4.02168	-0.0258449	12.7307	-0.0736857	28.6213	-0.10022	32.1606	-0.04696	21.7949
		-0.011104	3.86486	-0.0258612	12.6752	-0.0738898	27.9356	-0.100473	32.2266	-0.046976	21.8104
		-0.011072	3.61862	-0.0258286	12.8404	-0.0738367	27.4064	-0.100722	32.2531	-0.046992	21.8234
		-0.010992	3.38794	-0.0258898	12.9428	-0.0739184	28.3802	-0.100947	32.3515	-0.047008	21.8428
		-0.01096	3.31536	-0.0259184	12.8245	-0.0744122	28.6571	-0.10118	32.3799	-0.047048	21.8558
		-0.01096	3.35813	-0.0258816	12.5807	-0.0745714	27.4381	-0.101445	32.4485	-0.04712	21.8726
		-0.010952	3.52661	-0.0258408	12.5563	-0.0744041	27.306	-0.101682	32.4908	-0.047184	21.8869
		-0.010928	3.83506	-0.025849	12.7413	-0.0747673	28.9246	-0.101959	32.5719	-0.047288	21.9167
		-0.010952	4.32202	-0.0258857	12.8919	-0.0753224	28.548	-0.102229	32.6221	-0.047336	21.9271
		-0.010976	4.82827	-0.0259061	12.8899	-0.0752122	27.3086	-0.102514	32.7046	-0.047464	21.9465
		-0.011024	5.2776	-0.0259102	12.6758	-0.0752122	28.4093	-0.102743	32.7653	-0.047488	21.9608
		-0.011016	5.67288	-0.025902	12.6706	-0.0758	29.0065	-0.103004	32.8194	-0.047568	21.9828
		-0.011016	5.98392	-0.0258653	12.8173	-0.0758939	27.5702	-0.103241	32.8669	-0.047624	21.9984
		-0.011008	6.29194	-0.0258653	13.1199	-0.0757755	28.0842	-0.103506	32.8801	-0.047696	22.0087
		-0.011024	6.666	-0.0258776	13.3255	-0.0762082	29.5033	-0.103739	32.9251	-0.047768	22.023
		-0.011024	7.10635	-0.0258776	13.2706	-0.0766204	28.7568	-0.103967	32.9047	-0.047816	22.0372
		-0.011048	7.45627	-0.0258245	13.27	-0.0764694	27.9798	-0.1042	32.9205	-0.04784	22.0606
		-0.01104	7.66882	-0.0258082	13.5284	-0.0767102	29.4616	-0.104441	32.9053	-0.047896	22.0813
		-0.011016	7.80221	-0.0258327	13.9116	-0.0771878	29.6215	-0.104633	32.9132	-0.047952	22.1046
		-0.010976	8.0376	-0.0258286	14.0958	-0.0773673	28.5168	-0.104902	32.9483	-0.047976	22.1176
		-0.011016	8.40778	-0.0258327	14.3515	-0.0772735	28.4977	-0.105147	32.9469	-0.04804	22.137
		-0.011048	8.61758	-0.0258367	14.5629	-0.0776612	29.7643	-0.105351	32.9542	-0.048064	22.1539
		-0.01104	8.83272	-0.0258449	14.6428	-0.0780041	29.0263	-0.105576	32.9925	-0.04812	22.1629
		-0.011056	9.18134	-0.0258367	14.6468	-0.0779837	27.9566	-0.105796	32.9522	-0.048168	22.1785
		-0.011096	9.4885	-0.0258612	14.7823	-0.0779714	28.8426	-0.106008	32.9509	-0.048288	22.194
		-0.011048	9.51701	-0.0258816	14.8689	-0.0785388	29.7742	-0.106237	32.9655	-0.048416	22.2161
		-0.011048	9.43277	-0.0258367	14.9971	-0.0786898	28.3808	-0.10649	32.9919	-0.04852	22.2329
		-0.010976	9.62285	-0.0258776	15.1795	-0.0785388	28.2242	-0.106755	32.9536	-0.0486	22.2485
		-0.010944	9.97877	-0.025849	15.2786	-0.0788612	29.7571	-0.107016	33.0401	-0.048616	22.2601
		-0.010976	10.2429	-0.0258204	15.2931	-0.0793265	29.7934	-0.107233	33.0474	-0.048696	22.2796
		-0.010976	10.2364	-0.0258122	15.3757	-0.0793918	28.7238	-0.107498	33.1598	-0.048728	22.2977
		-0.010976	10.1599	-0.0258571	15.4998	-0.0794531	28.9484	-0.107784	33.1869	-0.048752	22.3198
		-0.010976	10.3621	-0.0258735	15.4139	-0.0798408	29.9163	-0.108016	33.0774	-0.048792	22.334
		-0.011032	10.6835	-0.0258694	15.2348	-0.0801265	29.4036	-0.10818	32.7946	-0.048864	22.3457
		-0.011064	10.8105	-0.0258531	15.3788	-0.0801551	28.4529	-0.108347	32.4834	-0.048912	22.356
		-0.011048	10.7418	-0.025898	15.651	-0.0801388	28.9002	-0.108429	32.2839	-0.04896	22.3755
		-0.010984	10.8507	-0.025898	15.62	-0.080551	30.1171	-0.108437	31.9165	-0.048992	22.3962
		-0.011008	11.0853	-0.0258898	15.5744	-0.0808816	29.2741	-0.108433	31.6891	-0.049048	22.4079
		-0.011056	11.071	-0.0258939	15.69	-0.0807959	28.4575	-0.108473	31.845	-0.04912	22.4221
		-0.01112	10.5385	-0.025902	15.6398	-0.0808735	29.6467	-0.108461	31.8536	-0.049184	22.439
		-0.011104	9.79642	-0.0258571	15.4575	-0.0813878	30.4164	-0.108449	31.5326	-0.049224	22.4675
		-0.010984	9.1476	-0.0258571	15.4516	-0.081551	29.0475	-0.108449	31.6788	-0.049216	22.4831
		-0.010944	8.89622	-0.0258571	15.626	-0.0813796	28.9338	-0.108461	31.8558	-0.04924	22.496
		-0.010976	8.95325	-0.0258857	15.8268	-0.0817673	30.3893	-0.108433	31.7052	-0.049328	22.5168
		-0.011016	9.2111	-0.0259224	15.6721	-0.0822327	29.9863	-0.108433	31.7885	-0.049336	22.5271
		-0.010968	9.62146	-0.0259184	15.0748	-0.0822082	28.7489	-0.108453	32.0058	-0.049424	22.5479
		-0.011024	9.97608	-0.0258327	14.8752	-0.0821673	29.3685	-0.108457	31.8994	-0.049504	22.5673
		-0.011048	9.95146	-0.0257959	15.2367	-0.0826531	30.4164	-0.108465	31.8842	-0.049568	22.588
		-0.01108	9.51907	-0.0258735	15.4785	-0.0828857	29.3276	-0.108486	31.9086	-0.049632	22.6114
		-0.011048	8.87933	-0.0258857	15.3339	-0.0827796	28.7079	-0.108486	31.8035	-0.049712	22.6308
		-0.011048	8.22408	-0.0258816	14.8787	-0.0829714	30.0709	-0.108469	31.8999	-0.049768	22.6476
		-0.011096	7.6621	-0.0258327	14.51	-0.083498	30.6655	-0.108469	31.9198	-0.049816	22.6606
		-0.011064	7.18152	-0.0258041	14.4942	-0.083698	29.5192	-0.108486	31.9085	-0.049856	22.6723
		-0.011016	6.77587	-0.0258531	14.9045	-0.0836327	29.5839	-0.108461	31.9178	-0.049936	22.6813
		-0.010976	6.45485	-0.0259429	15.1728	-0.0841143	30.8947	-0.108465	32.1305	-0.049984	22.6969
		-0.010976	6.21427	-0.0259714	14.9613	-0.0844327	29.5958	-0.108482	31.9832	-0.050016	22.7189
		-0.010944	6.13037	-0.0259143	14.214	-0.0842367	28.8063	-0.108453	31.795	-0.05004	22.7319
		-0.010992	6.1835	-0.0258408	13.9305	-0.084302	30.0054	-0.108412	31.7626	-0.050088	22.7487
		-0.011048	6.20424	-0.0258286	14.0917	-0.0846898	30.0325	-0.108449	31.8663	-0.05016	22.7643
		-0.011064	6.02798	-0.0258694	14.1307	-0.0844367	28.5804	-0.108441	31.5808	-0.05024	22.7902
		-0.011048	5.7325	-0.0258531	13.9993	-0.084249	29.2694	-0.108416	31.7565	-0.050328	22.8006
		-0.010952	5.45774	-0.0258531	13.743	-0.0845265	29.9757	-0.10849	32.067	-0.050384	22.82
		-0.010952	5.40461	-0.025849	13.5369	-0.0845592	28.8969	-0.108465	31.8819	-0.05044	22.842
		-0.010992	5.47978	-0.0258163	13.572	-0.0842776	28.402	-0.108453	31.8924	-0.050536	22.8589
		-0.011008	5.51736	-0.0258163	14.0028	-0.0842612	29.393	-0.108494	32.0821	-0.050632	22.877
		-0.011048	5.42405	-0.025902	14.2822	-0.0845796	29.6837	-0.108506	32.03	-0.050728	22.8926
		-0.011024	5.22058	-0.0259388	14.144	-0.0844816	28.2857	-0.108473	32.1463	-0.050776	22.9068
		-0.011	5.07154	-0.025849	13.6716	-0.0842082	28.2711	-0.108506	32.266	-0.050864	22.9172
		-0.010976	5.07413	-0.0258286	13.6385	-0.0843959	29.5541	-0.108473	32.1452	-0.050896	22.9354
		-0.010992	5.14282	-0.0258571	13.9134	-0.0846735	29.0923	-0.108465	32.2416	-0.051008	22.9587
		-0.011016	5.20762	-0.0258612	13.9927	-0.0844449	27.8126	-0.108429	32.0757	-0.051104	22.9781
		-0.011016	5.2465	-0.0258857	13.9669	-0.0842816	28.5823	-0.108408	31.8662	-0.0512	22.9937
		-0.010984	5.29963	-0.0258612	13.8626	-0.0845714	29.4379	-0.108408	31.8827	-0.051256	23.0092
		-0.010976	5.42794	-0.025849	13.8658	-0.0845918	28.3669	-0.108408	31.892	-0.051328	23.0287
		-0.011008	5.74546	-0.0257918	14.2179	-0.0842816	27.7981	-0.108433	31.7942	-0.051384	23.0429
		-0.011032	6.20765	-0.0258286	14.726	-0.0842857	29.1042	-0.108457	31.6423	-0.051496	23.0611
		-0.011064	6.60634	-0.0258653	14.9085	-0.0845878	29.3474	-0.108449	31.4026	-0.051616	23.0753
		-0.011008	6.77198	-0.0258939	14.5755	-0.0844898	28.0763	-0.108453	31.2578	-0.051664	23.0896
		-0.010968	6.83938	-0.0258245	14.4295	-0.0842286	28.0981	-0.108441	30.8832	-0.051736	23.109
		-0.010984	7.11542	-0.025849	14.6429	-0.0843796	29.2483	-0.108437	30.7392	-0.051808	23.1298
		-0.011032	7.59744	-0.0259061	15.0255	-0.0845592	28.8103	-0.108449	30.8138	-0.05184	23.1388
		-0.011032	8.15942	-0.025898	15.2216	-0.0843469	27.6601	-0.108469	30.6882	-0.051904	23.1479
		-0.010992	8.67086	-0.0258939	15.4958	-0.0841633	28.3062	-0.108465	30.3506	-0.052	23.1647
		-0.011008	9.11654	-0.0258898	15.8089	-0.084449	29.2641	-0.108478	30.1545	-0.05208	23.1879
		-0.011024	9.38093	-0.0258857	15.947	-0.0845143	28.3048	-0.108469	29.7039	-0.052152	23.2034
		-0.011008	9.41333	-0.0258327	15.9562	-0.0842245	27.7029	-0.108461	29.246	-0.052232	23.2213
		-0.010968	9.33168	-0.0258449	16.0441	-0.084302	29.0652	-0.108461	29.0538	-0.0524	23.2314
		-0.010984	9.43267	-0.0258776	15.9041	-0.0845592	29.3414	-0.108461	28.7644	-0.052552	23.2557
		-0.011032	9.65256	-0.0258163	15.7197	-0.0844857	28.0287	-0.108465	28.5688	-0.052616	23.2738
		-0.010968	9.84922	-0.0258122	15.8294	-0.0842653	27.9349	-0.108461	28.3547	-0.052712	23.2957
		-0.01096	10.1135	-0.0258163	15.9999	-0.0843714	28.9451	-0.108449	28.1268	-0.052784	23.3074
		-0.011016	10.5384	-0.0258082	16.1677	-0.0844612	28.8566	-0.108445	27.8619	-0.05288	23.3294
		-0.011064	10.8053	-0.0257878	16.3375	-0.0844571	28.108	-0.108441	27.7013	-0.052936	23.3541
		-0.011048	10.8066	-0.0258041	16.4499	-0.0843143	28.2771	-0.108449	27.4727	-0.052984	23.3735
		-0.011016	10.6718	-0.0258571	16.4307	-0.084449	29.3474	-0.108449	27.2506	-0.053104	23.3942
		-0.010984	10.6641	-0.025849	16.1486	-0.0846163	29.0944	-0.108465	27.376	-0.053176	23.4111
		-0.010976	10.962	-0.0258163	16.0839	-0.0845061	27.8887	-0.108461	27.421	-0.05328	23.4279
		-0.011024	11.3736	-0.0258408	16.6765	-0.084298	28.3445	-0.108441	27.3456	-0.053392	23.437
		-0.011104	11.5134	-0.025951	16.7809	-0.0845469	29.5628	-0.108424	27.2465	-0.053528	23.4513
		-0.011048	11.2365	-0.0259184	16.4062	-0.0846735	28.7092	-0.108429	27.4349	-0.053664	23.4694
		-0.011024	10.6809	-0.0258857	16.3785	-0.0844163	27.738	-0.108437	27.1218	-0.053728	23.485
		-0.011016	10.2156	-0.0259102	16.4644	-0.084351	29.0685	-0.108433	26.8741	-0.053816	23.5031
		-0.010944	9.97589	-0.0258898	16.3091	-0.0845714	29.7286	-0.108441	26.9548	-0.053864	23.52
		-0.010968	10.0912	-0.0258531	16.3931	-0.0845837	28.8149	-0.108469	27.2408	-0.053912	23.5329
		-0.010976	10.4178	-0.0258531	16.5516	-0.0843102	28.4739	-0.108461	27.1826	-0.053992	23.5511
		-0.011024	10.9399	-0.0258694	16.5325	-0.0843878	29.7887	-0.108445	27.3412	-0.054096	23.5679
		-0.011048	11.3582	-0.0258531	16.4076	-0.0846041	29.537	-0.108457	27.6193	-0.0542	23.5835
		-0.011064	11.3491	-0.0258612	16.366	-0.0844653	28.2315	-0.108494	27.8275	-0.054312	23.5977
		-0.011064	10.9245	-0.0258735	16.1578	-0.0842245	28.949	-0.108453	27.7998	-0.054472	23.6159
		-0.011088	10.2885	-0.0258816	15.9279	-0.0845102	30.1066	-0.108449	28.0257	-0.054584	23.6379
		-0.011032	9.60725	-0.0258571	15.799	-0.0846122	28.8552	-0.108441	28.2807	-0.054624	23.656
		-0.010984	8.98694	-0.0258776	15.7124	-0.0842816	28.1773	-0.108445	28.5879	-0.054664	23.6729
		-0.011016	8.43643	-0.025849	15.5129	-0.0843306	29.5813	-0.108392	28.806	-0.054744	23.6936
		-0.011032	8.06626	-0.0258122	15.4826	-0.0846204	29.3712	-0.108441	29.2777	-0.054808	23.7118
		-0.011032	7.82045	-0.0258449	15.552	-0.0844286	28.0993	-0.108441	29.5029	-0.05488	23.726
		-0.01104	7.62605	-0.0258571	15.4542	-0.0841959	28.8538	-0.108461	29.9034	-0.05496	23.739
		-0.011048	7.3824	-0.0258735	15.1682	-0.0844939	29.8977	-0.108461	30.1167	-0.055032	23.7571
		-0.011016	7.02211	-0.025849	14.7816	-0.0846327	28.9073	-0.10849	30.3506	-0.055088	23.7766
		-0.01096	6.75125	-0.0258204	14.7533	-0.0843265	28.1092	-0.108465	30.5059	-0.055184	23.796
		-0.010944	6.65664	-0.0258327	14.8319	-0.0843633	29.4141	-0.108453	30.7723	-0.05528	23.8116
		-0.01104	6.58166	-0.0258612	14.7618	-0.0846367	29.7166	-0.108469	30.8772	-0.055408	23.8323
		-0.011072	6.28406	-0.0258653	14.5575	-0.0846653	28.8221	-0.108461	30.8528	-0.05552	23.8414
		-0.011056	5.86723	-0.0258367	14.3574	-0.0844163	28.4336	-0.108465	30.9076	-0.055624	23.8608
		-0.011024	5.46422	-0.0257959	14.2979	-0.0844286	29.2132	-0.108473	31.0575	-0.055752	23.8802
		-0.010976	5.148	-0.0258286	14.5866	-0.0845714	29.0778	-0.108449	30.8798	-0.05588	23.8932
		-0.01092	4.9523	-0.0258898	14.7525	-0.0844898	27.8715	-0.108429	30.9267	-0.056	23.9113
		-0.010912	4.95619	-0.0258857	14.5927	-0.0841714	27.9706	-0.108445	31.1924	-0.056072	23.9321
		-0.010904	5.02747	-0.0258408	14.4433	-0.0843878	29.3435	-0.108424	31.02	-0.056176	23.9437
		-0.010968	5.12467	-0.0258694	14.4843	-0.0846	28.4959	-0.108429	31.02	-0.056264	23.9619
		-0.011016	5.12726	-0.025902	14.4434	-0.0842776	27.5531	-0.108457	31.2512	-0.056384	23.9774
		-0.01108	5.04048	-0.0258816	14.3694	-0.0842612	28.9523	-0.108441	31.0114	-0.056496	24.0008
		-0.011016	4.77139	-0.0258694	14.3746	-0.0845796	29.0296	-0.108433	30.9307	-0.05656	24.0176
		-0.011008	4.43621	-0.0258898	14.1506	-0.0843265	27.625	-0.108449	31.0813	-0.056608	24.0396
		-0.010976	4.19405	-0.0258286	13.9953	-0.0841714	28.4793	-0.108437	30.9631	-0.056672	24.0591
		-0.010904	4.07741	-0.0257673	14.3514	-0.0845388	29.0177	-0.108445	30.938	-0.056776	24.0798
		-0.010896	4.12536	-0.0258776	14.8555	-0.0844857	27.4889	-0.108441	30.9307	-0.056856	24.0928
		-0.010968	4.26662	-0.0259388	14.995	-0.0842122	27.5874	-0.108457	30.9836	-0.056944	24.1122
		-0.011	4.4364	-0.0259429	14.5061	-0.0844571	28.9074	-0.108473	31.0338	-0.057008	24.1265
		-0.011032	4.67698	-0.0258449	13.9372	-0.0846408	28.1946	-0.108473	30.8852	-0.05704	24.1511
		-0.011056	4.86182	-0.0257755	14.0238	-0.0843469	27.5068	-0.108457	30.8126	-0.05708	24.1602
		-0.011064	4.87714	-0.0257796	14.7466	-0.0843673	28.8374	-0.108453	30.8681	-0.057192	24.1757
		-0.011032	4.78382	-0.0258327	15.2494	-0.0846367	28.7918	-0.108453	30.7406	-0.057296	24.1926
		-0.011	4.68955	-0.0258776	15.3432	-0.0844694	27.4764	-0.108433	30.6144	-0.057336	24.2068
		-0.011024	4.55784	-0.0258816	14.9138	-0.0842776	28.1304	-0.108424	30.4809	-0.057432	24.2185
		-0.01104	4.46232	-0.0258041	14.6185	-0.0845143	29.2701	-0.108441	30.1967	-0.05756	24.2237
		-0.010992	4.4688	-0.0257796	14.8808	-0.0846571	28.2752	-0.108469	29.9708	-0.057576	24.2418
		-0.010944	4.54522	-0.0258449	15.416	-0.0843755	27.6918	-0.108473	29.7858	-0.057632	24.2703
		-0.010976	4.64582	-0.0258653	15.6802	-0.0844286	29.0436	-0.108486	29.5492	-0.057688	24.2976
		-0.011	4.7892	-0.0258816	15.7139	-0.084649	28.9082	-0.108461	29.3465	-0.05776	24.3235
		-0.011	5.04821	-0.0258367	15.5044	-0.0845306	27.6404	-0.108445	29.3306	-0.057856	24.3455
		-0.010992	5.49274	-0.0257959	15.5771	-0.084249	28.153	-0.108433	29.2652	-0.057896	24.3624
		-0.010984	6.01085	-0.0258041	15.9702	-0.0844816	29.3244	-0.108424	28.9314	-0.057888	24.3831
		-0.01096	6.4873	-0.0258408	16.2246	-0.0845837	28.2943	-0.108412	28.7445	-0.057912	24.3999
		-0.010984	6.93787	-0.0258449	16.288	-0.0843224	27.4863	-0.108437	28.6189	-0.057984	24.4077
		-0.011016	7.4135	-0.0258571	16.1473	-0.0842653	28.7581	-0.108441	28.3136	-0.05804	24.4207
		-0.011032	7.83312	-0.0258694	16.2088	-0.084551	29.015	-0.108445	28.2244	-0.05808	24.4427
		-0.011016	8.19941	-0.025849	16.3072	-0.0844204	27.5854	-0.108437	28.1247	-0.058112	24.4531
		-0.011024	8.5321	-0.0258612	16.3865	-0.0841673	28.0215	-0.108457	28.0395	-0.058168	24.4686
		-0.011048	8.77051	-0.025849	16.4269	-0.0843796	29.3031	-0.108469	27.9418	-0.058208	24.4842
		-0.01108	8.7731	-0.0258327	16.3542	-0.0845265	28.3043	-0.108486	28.1202	-0.058216	24.4984
		-0.01104	8.64221	-0.0258286	16.2756	-0.0842408	27.382	-0.108486	28.1433	-0.058256	24.5256
		-0.010984	8.59426	-0.0258612	16.3159	-0.0842531	28.7806	-0.108478	28.3038	-0.058368	24.5451
		-0.010912	8.65646	-0.0258776	16.4559	-0.0845265	29.0383	-0.108461	28.4656	-0.058456	24.5606
		-0.010912	8.89234	-0.025902	16.4915	-0.0844816	27.6879	-0.108445	28.6558	-0.05848	24.5697
		-0.010984	9.21115	-0.0259265	16.2629	-0.0842694	28.1074	-0.108424	28.8303	-0.058528	24.5892
		-0.011064	9.34205	-0.0258653	15.9582	-0.0844898	29.4003	-0.108429	29.111	-0.058592	24.6164
		-0.011016	9.23318	-0.0258204	16.2589	-0.0846531	28.7535	-0.108424	29.2274	-0.058672	24.6319
		-0.010992	9.12432	-0.0258571	16.4921	-0.0843918	27.8457	-0.108429	29.5313	-0.058736	24.6449
		-0.010992	9.10877	-0.0258531	16.4155	-0.084351	29.2113	-0.108437	29.9219	-0.058792	24.6643
		-0.010976	9.14765	-0.0258408	16.2821	-0.0846286	29.6202	-0.108445	30.1413	-0.058832	24.6838
		-0.010968	9.38592	-0.0258286	16.037	-0.0845306	28.2421	-0.108453	30.3726	-0.058872	24.7045
		-0.011056	9.73795	-0.0258327	15.8111	-0.0842245	28.515	-0.108449	30.6665	-0.058888	24.7278
		-0.011088	10.0044	-0.0258571	15.9333	-0.0844816	29.9261	-0.108457	30.9282	-0.05892	24.7486
		-0.011072	9.97478	-0.025898	15.9286	-0.0846	28.9311	-0.108461	30.8812	-0.058968	24.7615
		-0.011064	9.64349	-0.025898	15.6498	-0.0842939	28.0637	-0.108457	31.0041	-0.059008	24.7771
		-0.011136	8.99218	-0.0258653	15.3015	-0.0843061	29.4095	-0.108465	31.0404	-0.059016	24.7913
		-0.011112	8.11142	-0.0258653	15.2982	-0.0845633	29.6295	-0.108469	31.0464	-0.059088	24.8055
		-0.011032	7.24099	-0.0258327	15.1265	-0.0844449	28.3009	-0.108482	31.1059	-0.059168	24.8261
		-0.010952	6.62328	-0.0258367	14.89	-0.0841592	28.8043	-0.108478	31.1231	-0.059208	24.8466
		-0.01092	6.29587	-0.0258367	14.7863	-0.0844204	29.9645	-0.108453	31.1079	-0.059288	24.8568
		-0.010936	6.12907	-0.0258531	14.7896	-0.0844327	28.6603	-0.108445	31.2334	-0.05932	24.8682
		-0.010928	6.1213	-0.0258694	14.6633	-0.0841143	28.1086	-0.108441	31.423	-0.059352	24.8771
		-0.011008	6.22752	-0.0259102	14.6026	-0.0842327	29.5436	-0.108437	31.3027	-0.059392	24.9029
		-0.011016	6.28843	-0.025898	14.4756	-0.0844612	28.8743	-0.108441	31.4395	-0.059456	24.9184
		-0.011032	6.15494	-0.0259061	14.3157	-0.0841673	27.8959	-0.108449	31.5697	-0.059496	24.9353
		-0.011104	5.81285	-0.0258857	14.2298	-0.0842367	29.3593	-0.108445	31.4879	-0.059472	24.956
		-0.011104	5.39942	-0.025902	14.2238	-0.0845469	29.0574	-0.108424	31.2196	-0.059544	24.9716
		-0.011064	5.06246	-0.0258939	14.3573	-0.0842653	27.9705	-0.108437	31.4568	-0.059616	24.9936
		-0.010992	4.79333	-0.0259388	14.3791	-0.0842694	29.2781	-0.108461	31.439	-0.059664	25.013
		-0.010976	4.58126	-0.0259306	14.107	-0.0845429	29.3177	-0.108424	31.0795	-0.05972	25.0286
		-0.010944	4.44288	-0.0259061	13.6934	-0.0843224	27.921	-0.108465	31.3194	-0.059776	25.0532
		-0.010944	4.39752	-0.025849	13.6095	-0.0841265	28.9748	-0.108473	31.5123	-0.059776	25.0662
		-0.010992	4.42214	-0.0258612	13.8104	-0.0844735	29.4915	-0.108433	31.2255	-0.059824	25.083
		-0.011032	4.38067	-0.0258816	13.8441	-0.0843388	28.03	-0.108412	31.4687	-0.059872	25.1064
		-0.011088	4.16294	-0.0258776	13.7509	-0.0841061	28.3049	-0.108453	31.6557	-0.05992	25.1258
		-0.011072	3.83246	-0.0258163	13.5091	-0.0843633	29.6117	-0.10842	31.2923	-0.05996	25.1413
		-0.01104	3.54216	-0.0257959	13.4741	-0.0845224	28.6002	-0.108429	31.3313	-0.060008	25.1595
		-0.010992	3.34776	-0.0257633	13.8652	-0.084249	28.0208	-0.108457	31.4535	-0.060072	25.1815
		-0.01088	3.23112	-0.0258531	14.4724	-0.0843755	29.434	-0.108445	31.0543	-0.060112	25.1984
		-0.010888	3.15725	-0.0259224	14.4936	-0.0846245	29.0554	-0.108424	30.8779	-0.060152	25.2126
		-0.010888	3.15595	-0.0258898	14.0033	-0.0843551	27.921	-0.108457	31.1018	-0.060208	25.2269
		-0.010984	3.25704	-0.0258286	13.8573	-0.0843061	29.1327	-0.108441	30.7933	-0.060296	25.2398
		-0.011024	3.38794	-0.0258327	13.8699	-0.0846245	29.3527	-0.108433	30.4985	-0.060368	25.2606
		-0.011008	3.45533	-0.0258245	13.9254	-0.0844245	28.0717	-0.108445	30.5997	-0.060448	25.2826
		-0.01104	3.46181	-0.0258	14.0073	-0.0843714	29.1777	-0.108461	30.5342	-0.060456	25.2995
		-0.011088	3.37368	-0.0258163	14.1572	-0.0847061	29.4644	-0.108437	30.2825	-0.060496	25.3176
		-0.011096	3.14472	-0.0258327	14.2259	-0.0845388	27.9904	-0.108441	30.2376	-0.060576	25.3357
		-0.011088	2.84582	-0.0258163	14.4128	-0.0843061	28.6134	-0.108465	30.1815	-0.060648	25.3474
		-0.011	2.63098	-0.0258163	14.9407	-0.0845918	29.5204	-0.108465	29.8247	-0.060664	25.3681
		-0.010888	2.6245	-0.0258898	15.3702	-0.0845633	28.18	-0.108473	29.6887	-0.06076	25.3837
		-0.010784	2.89234	-0.0259184	15.1628	-0.0842245	27.9877	-0.108482	29.472	-0.060832	25.3941
		-0.010856	3.38434	-0.0258327	14.7677	-0.0844245	29.2826	-0.108469	29.1753	-0.060912	25.407
		-0.010984	4.12891	-0.0257837	14.8186	-0.0846245	28.5539	-0.108457	28.9916	-0.06096	25.4316
		-0.011088	4.95139	-0.0258286	15.0869	-0.0843755	27.5484	-0.108453	28.7472	-0.061	25.4563
		-0.011136	5.55106	-0.0258449	15.0982	-0.0843592	28.8539	-0.108441	28.5793	-0.061056	25.4718
		-0.011104	5.82062	-0.0258531	15.1325	-0.0847143	29.0104	-0.108441	28.4128	-0.061104	25.4848
		-0.011104	5.86469	-0.025849	15.2515	-0.0845429	27.6336	-0.108453	28.1711	-0.061144	25.5042
		-0.011072	5.82192	-0.0258776	15.2852	-0.0842449	28.1886	-0.108437	27.8757	-0.061256	25.525
		-0.011016	5.82322	-0.0258122	15.157	-0.084498	29.1968	-0.108433	27.9701	-0.061328	25.5522
		-0.011008	5.95925	-0.0258	15.3393	-0.0844531	27.8193	-0.108453	27.723	-0.061456	25.5716
		-0.010976	6.2711	-0.0258	15.5798	-0.0841918	28.1649	-0.108429	27.5016	-0.061552	25.5936
		-0.011	6.68146	-0.0258367	15.8077	-0.0844204	29.3164	-0.108424	27.3761	-0.06164	25.6092
		-0.011	7.05192	-0.0258449	15.9041	-0.084498	28.2818	-0.108412	27.4831	-0.061736	25.6196
		-0.011	7.4161	-0.0258367	15.6953	-0.0843102	28.2455	-0.108433	27.4349	-0.06176	25.6364
		-0.010992	7.65845	-0.0257918	15.6054	-0.0844735	29.3309	-0.108441	27.3503	-0.061824	25.6584
		-0.010984	7.81781	-0.0257878	15.9933	-0.0845959	28.2897	-0.108433	27.3199	-0.06192	25.6818
		-0.010984	8.06486	-0.0258245	16.132	-0.0842735	27.8741	-0.108473	27.5632	-0.062	25.6947
		-0.010992	8.45448	-0.0258449	15.9582	-0.0844449	29.1168	-0.108461	27.6233	-0.062048	25.7025
		-0.01104	8.65387	-0.0258204	15.8287	-0.0845143	28.038	-0.108461	27.6168	-0.062104	25.7232
		-0.011048	8.75496	-0.0258082	15.8605	-0.0842367	27.3158	-0.108457	27.7014	-0.062168	25.7427
		-0.011064	8.86901	-0.0258082	15.867	-0.0842449	28.657	-0.108465	27.9643	-0.062272	25.7647
		-0.011056	8.904	-0.0258367	15.803	-0.0845224	28.6636	-0.108433	27.9748	-0.06236	25.779
		-0.011008	8.81458	-0.0258245	15.6286	-0.0843184	27.4163	-0.108433	28.06	-0.062464	25.7984
		-0.01092	8.85734	-0.0258286	15.5077	-0.0842571	28.4641	-0.108416	28.1418	-0.062544	25.8192
		-0.010912	9.14117	-0.0258449	15.3796	-0.084551	29.1466	-0.108424	28.5798	-0.062712	25.8425
		-0.010992	9.47554	-0.0258531	15.2237	-0.0845265	27.8491	-0.108449	28.8706	-0.06292	25.8865
		-0.01104	9.49627	-0.0258816	15.0783	-0.0842735	27.8332	-0.108453	29.2353	-0.063208	25.9436
		-0.01108	9.27854	-0.025902	14.9832	-0.0844694	29.2344	-0.108469	29.7005	-0.063488	26.0071
		-0.01104	8.98046	-0.0259143	14.931	-0.0846163	28.4918	-0.108473	30.0844	-0.063824	26.0654
		-0.011024	8.82624	-0.0259347	14.6594	-0.0843429	27.7928	-0.108469	30.3573	-0.064192	26.1289
		-0.010944	8.8392	-0.0258694	13.8599	-0.0843837	29.2165	-0.108453	30.679	-0.0646	26.1898
		-0.010944	9.0349	-0.0257184	13.1563	-0.0846694	29.3989	-0.108486	30.9638	-0.064952	26.2559
		-0.010976	9.37944	-0.0256	13.3558	-0.0844653	28.1951	-0.108461	30.8461	-0.065336	26.3168
		-0.011056	9.70819	-0.0256286	14.3151	-0.084298	29.206	-0.108473	31.1666	-0.065712	26.3764
		-0.01108	9.7367	-0.0257714	15.3346	-0.0846531	29.9281	-0.108465	31.1964	-0.066088	26.4369
		-0.011104	9.55051	-0.0259306	15.6108	-0.0844531	28.5823	-0.108473	31.0768	-0.066456	26.4986
		-0.011072	9.34982	-0.0259388	14.9501	-0.0843102	29.245	-0.108465	31.2175	-0.066768	26.5593
		-0.011072	9.05693	-0.0258898	13.8804	-0.084551	30.2188	-0.108473	31.2922	-0.067088	26.6215
		-0.01104	8.54011	-0.0257592	12.9582	-0.0845592	28.8597	-0.108453	31.2744	-0.067416	26.6759
		-0.011016	7.88352	-0.0256449	12.68	-0.0842653	28.8967	-0.108457	31.3007	-0.067744	26.729
		-0.01104	7.34611	-0.0256694	13.2951	-0.084498	30.1282	-0.108433	31.4269	-0.068032	26.777
		-0.011	6.94435	-0.0257959	14.0799	-0.0845551	29.1022	-0.108445	31.4004	-0.068336	26.8353
		-0.010976	6.74218	-0.0259061	14.1619	-0.0842449	28.5466	-0.108469	31.545	-0.068696	26.9027
		-0.010968	6.7033	-0.0259673	13.5903	-0.0843633	30.0477	-0.108473	31.51	-0.068944	26.961
		-0.011008	6.72922	-0.0259224	12.5675	-0.0845265	29.3328	-0.108478	31.5061	-0.069208	27.0245
		-0.01108	6.59338	-0.025751	11.8916	-0.0842449	28.4608	-0.108465	31.1223	-0.06952	27.0803
		-0.011112	6.19339	-0.0256816	12.2213	-0.084249	29.5456	-0.108445	30.7491	-0.069856	27.1386
		-0.011064	5.69491	-0.0257388	13.2487	-0.0844367	29.064	-0.108441	30.6586	-0.070096	27.1826
		-0.011032	5.32944	-0.0258816	13.9319	-0.0842286	28.4278	-0.108429	30.3368	-0.070392	27.2436
		-0.011024	5.05858	-0.0259388	13.9313	-0.0842857	29.4168	-0.108408	30.0097	-0.070648	27.3109
		-0.011	4.81013	-0.0259796	13.143	-0.0844531	28.922	-0.108416	30.0633	-0.070816	27.3706
		-0.010968	4.62658	-0.0258653	11.9412	-0.0842612	28.7085	-0.108437	29.976	-0.070928	27.4146
		-0.010976	4.57502	-0.025698	11.3036	-0.0844082	29.8957	-0.108437	29.4712	-0.070984	27.438
		-0.010952	4.65754	-0.0256531	11.9491	-0.0845551	29.1293	-0.108437	29.1105	-0.071104	27.4768
		-0.011016	4.75814	-0.0258082	13.0115	-0.0842857	28.3643	-0.108445	28.9479	-0.071376	27.5235
		-0.01104	4.80197	-0.0259265	13.4066	-0.0843918	29.7279	-0.108461	28.4795	-0.071624	27.5909
		-0.011056	4.77605	-0.0259714	13.2732	-0.0845878	29.28	-0.108453	28.0361	-0.071848	27.6466
		-0.011032	4.63906	-0.0259224	12.487	-0.0843429	28.1191	-0.108465	27.8816	-0.072088	27.7062
		-0.011	4.37126	-0.0257347	11.5614	-0.0842816	29.2198	-0.108457	27.6048	-0.072296	27.7736
		-0.011016	4.06963	-0.0255673	11.4299	-0.0845469	29.8177	-0.108469	27.2525	-0.072528	27.828
		-0.01104	3.96336	-0.0256122	12.4077	-0.0844612	28.3596	-0.108457	27.191	-0.07272	27.8864
		-0.011	4.03334	-0.0257959	13.3776	-0.0842776	28.7606	-0.108449	27.0279	-0.072904	27.9317
		-0.010952	4.23811	-0.025951	13.5771	-0.0845347	29.827	-0.108433	26.7392	-0.073056	27.9719
		-0.010944	4.55011	-0.0260122	13.1389	-0.0845429	28.4898	-0.108457	26.7874	-0.073208	27.9861
		-0.010952	5.02267	-0.0259633	12.1928	-0.0842612	28.3642	-0.108433	26.6283	-0.073296	27.9913
		-0.011	5.54069	-0.0257755	11.766	-0.0844776	29.4848	-0.108445	26.3535	-0.07328	27.9978
		-0.01108	5.90746	-0.0256776	12.2008	-0.0844694	28.2771	-0.108465	26.4063	-0.073328	28.0068
		-0.01108	6.03835	-0.0257592	13.3418	-0.0842857	28.291	-0.108461	26.2371	-0.073408	28.0159
		-0.011008	6.02669	-0.0258939	14.0363	-0.0844449	28.7574	-0.108445	25.9484	-0.073472	28.0159
		-0.01096	6.06422	-0.0259796	14.109	-0.0844857	27.6601	-0.108465	25.9226	-0.073512	28.0147
		-0.010904	6.3709	-0.0259673	13.336	-0.0842367	27.5431	-0.108465	25.8902	-0.073544	28.0147
		-0.01092	6.84346	-0.0258163	12.7988	-0.0844857	28.1688	-0.108441	25.6754	-0.073576	28.0082
		-0.010976	7.34093	-0.0257347	12.9719	-0.0844245	26.8765	-0.108445	25.6384	-0.073616	28.0081
		-0.011056	7.7257	-0.0257429	13.8711	-0.0842571	27.4269	-0.10842	25.5683	-0.073624	28.0068
		-0.011088	7.9499	-0.0258367	14.5622	-0.0845224	28.1365	-0.108429	25.6681	-0.073672	28.0056
		-0.011008	7.96286	-0.0259306	14.7089	-0.0844694	26.9003	-0.108416	25.6311	-0.073696	28.0133
		-0.010928	7.93958	-0.0259592	14.0502	-0.0842735	27.3569	-0.108424	25.7936	-0.073752	28.0172
		-0.010904	8.15424	-0.0258286	13.5528	-0.0845306	28.0142	-0.108441	26.0176	-0.073816	28.0184
		-0.010952	8.57237	-0.0257755	13.6195	-0.0844939	26.8434	-0.108469	26.0084	-0.073848	28.0107
		-0.011	8.99342	-0.0257714	14.3819	-0.0842857	27.222	-0.108424	25.8868	-0.073896	28.0106
		-0.011056	9.28373	-0.0258653	15.3082	-0.0845224	27.8266	-0.108429	26.2608	-0.074152	28.0107
		-0.011048	9.32779	-0.0259469	15.6689	-0.0844612	26.5759	-0.10842	26.3559	-0.074584	28.0159
		-0.011024	9.21634	-0.0259878	15.0273	-0.0842408	27.0132	-0.108416	26.6189	-0.074864	28.0172
		-0.010968	9.13339	-0.0258694	14.1189	-0.0844776	28.0168	-0.108437	27.1185	-0.074968	28.0146
		-0.010936	9.22282	-0.0257837	13.9254	-0.0844776	26.7727	-0.108465	27.5361	-0.074984	28.0108
		-0.010936	9.53093	-0.0257224	14.4698	-0.0842857	27.2213	-0.108457	27.6676	-0.075032	28.0082
		-0.011	10.0022	-0.0258245	15.4569	-0.0845306	28.1291	-0.108473	28.1282	-0.075008	28.0133
		-0.011024	10.445	-0.0259469	15.9293	-0.0844898	27.0225	-0.108445	28.3779	-0.075056	28.0146
		-0.011048	10.6641	-0.0260082	15.7298	-0.0842612	27.2604	-0.108453	28.728	-0.075104	28.0145
		-0.011096	10.5098	-0.0259673	14.8689	-0.0844857	28.182	-0.108457	29.0861	-0.075136	28.0133
		-0.011056	9.98794	-0.0258531	14.2927	-0.0844286	27.1751	-0.108473	29.4343	-0.07512	28.0146
		-0.010984	9.44021	-0.0257469	14.4176	-0.0842735	27.5438	-0.108478	29.6701	-0.07524	28.0133
		-0.010904	9.26942	-0.0257714	15.3255	-0.0844694	27.7704	-0.108498	29.8815	-0.075328	28.0146
		-0.010888	9.69662	-0.0258776	16.0363	-0.0843959	27.3489	-0.108469	30.0341	-0.075424	28.012
		-0.010976	10.3727	-0.0259306	16.1618	-0.0843837	27.6991	-0.108449	30.2713	-0.07552	28.0146
		-0.010984	10.9583	-0.0259469	15.5195	-0.0844367	27.6979	-0.108445	30.3526	-0.075584	28.0108
		-0.011064	11.2473	-0.0258735	14.7128	-0.0843551	27.76	-0.108437	30.5052	-0.075632	28.0147
		-0.011128	11.2719	-0.025751	14.4346	-0.0844367	28.5191	-0.108416	30.5442	-0.075632	28.0095
		-0.01112	11.0399	-0.0257184	14.9982	-0.0844408	27.7249	-0.108429	30.5587	-0.075696	28.0082
		-0.011072	10.5915	-0.0257878	15.869	-0.0842653	28.1366	-0.108449	30.6393	-0.075728	28.0133
		-0.011048	9.98928	-0.0258857	16.2636	-0.0844694	29.2405	-0.108445	30.6135	-0.075744	28.0198
		-0.010968	9.42211	-0.0259061	15.9589	-0.0844898	27.9879	-0.108461	30.636	-0.075752	28.0185
		-0.010968	9.21763	-0.0259061	15.0941	-0.0842286	28.1616	-0.108494	30.6756	-0.075816	28.0236
		-0.01096	9.29798	-0.0257837	14.3158	-0.0845143	29.1315	-0.108498	30.7007	-0.07584	28.0466
		-0.010944	9.36538	-0.0257306	14.2642	-0.0844653	27.8299	-0.108506	30.8534	-0.075888	28.0606
		-0.010992	9.37574	-0.0257837	14.9117	-0.084302	27.9944	-0.10851	30.8739	-0.07596	28.0734
		-0.010992	9.31224	-0.0259102	15.2778	-0.0844857	28.6312	-0.108449	30.591	-0.07604	28.0874
		-0.011032	9.21893	-0.0259224	15.1661	-0.0844327	27.9091	-0.108441	30.747	-0.076128	28.1042
		-0.011032	9.0971	-0.0259469	14.6132	-0.0843388	28.3907	-0.108433	30.6849	-0.076168	28.1236
		-0.011016	8.90659	-0.0258898	13.8381	-0.0845388	28.91	-0.108384	30.3042	-0.076176	28.1431
		-0.011064	8.50891	-0.0257633	13.4946	-0.0844531	27.7631	-0.108392	30.3664	-0.076232	28.1612
		-0.011032	7.9897	-0.0256939	14.1011	-0.0843306	28.6219	-0.108424	30.3215	-0.076376	28.1807
		-0.011024	7.54306	-0.0258082	14.8456	-0.0846122	28.9701	-0.108416	30.0487	-0.076472	28.191
		-0.011064	7.17893	-0.0258816	14.9963	-0.0844082	27.7003	-0.108412	30.0646	-0.076568	28.2053
		-0.01108	6.91843	-0.025902	14.5251	-0.0842735	28.5988	-0.108433	30.0547	-0.076632	28.2195
		-0.011056	6.68909	-0.0258776	13.6702	-0.0845592	29.2985	-0.108461	29.9508	-0.076696	28.239
		-0.011016	6.44333	-0.0258204	13.0194	-0.0844408	28.0241	-0.108482	29.8776	-0.076776	28.2519
		-0.010952	6.13147	-0.0257265	13.1793	-0.0843347	28.7264	-0.108498	29.7943	-0.07684	28.2753
		-0.010976	5.9904	-0.0258082	14.025	-0.0845959	29.356	-0.108494	29.5333	-0.076936	28.2908
		-0.011008	5.97096	-0.0259388	14.5603	-0.0844735	28.0723	-0.108498	29.2512	-0.07704	28.3077
		-0.011024	5.87506	-0.0260041	14.4401	-0.084351	28.6266	-0.108478	28.9129	-0.077136	28.3271
		-0.010976	5.62104	-0.0259673	13.6724	-0.0845918	28.7456	-0.108465	28.6335	-0.077256	28.3478
		-0.010936	5.38128	-0.0258408	12.9641	-0.0844	27.5221	-0.108469	28.4624	-0.077384	28.3647
		-0.010952	5.34629	-0.0257388	12.855	-0.0843388	28.0334	-0.108494	28.169	-0.077464	28.3764
		-0.010992	5.43182	-0.0257224	13.418	-0.0845347	27.8445	-0.108449	27.9127	-0.077552	28.3919
		-0.011016	5.49144	-0.0258041	13.8956	-0.0843061	26.8931	-0.108449	27.914	-0.077624	28.4139
		-0.011056	5.49533	-0.025898	14.0278	-0.0843429	27.8418	-0.108449	27.8565	-0.077736	28.4295
		-0.011072	5.44867	-0.0259714	13.4457	-0.0844857	27.518	-0.108416	27.6939	-0.077816	28.4489
		-0.011064	5.30093	-0.0258939	12.5842	-0.0842898	27.0681	-0.10838	27.6794	-0.077856	28.4684
		-0.011072	5.0508	-0.0257633	12.2498	-0.0844245	27.8371	-0.108429	27.6582	-0.077968	28.4891
		-0.011056	4.77005	-0.0257551	12.7988	-0.084498	27.1216	-0.108441	27.5797	-0.078096	28.5072
		-0.011016	4.70664	-0.0258653	13.5573	-0.0842408	26.6955	-0.108441	27.5003	-0.0782	28.5254
		-0.010968	4.84118	-0.0259592	13.8288	-0.0844245	27.8054	-0.108445	27.24	-0.07828	28.5435
		-0.01096	5.15837	-0.0259755	13.4	-0.0845061	26.8071	-0.108449	27.3787	-0.07844	28.5643
		-0.010976	5.59253	-0.0259102	12.658	-0.0842408	26.5289	-0.108441	27.4455	-0.07848	28.5798
		-0.010992	6.14678	-0.0257673	12.3449	-0.0844776	27.7274	-0.108396	27.3199	-0.078536	28.5993
		-0.011008	6.65952	-0.025751	12.7341	-0.0845469	26.7707	-0.108412	27.7389	-0.078648	28.6135
		-0.011064	7.06099	-0.0258163	13.3683	-0.0842898	26.558	-0.108433	28.2694	-0.078704	28.633
		-0.011048	7.20744	-0.0259061	13.7793	-0.0844612	27.4142	-0.108424	28.4657	-0.078784	28.6537
		-0.011024	7.1543	-0.0259633	13.6095	-0.0845224	26.7463	-0.108453	29.0054	-0.078832	28.6641
		-0.011032	7.07395	-0.0259184	12.888	-0.0842816	26.6479	-0.108461	29.4435	-0.078904	28.6783
		-0.011	7.09728	-0.0257714	12.5504	-0.0844857	27.2497	-0.108457	29.7508	-0.079016	28.6991
		-0.010976	7.17245	-0.0257102	12.9561	-0.0844653	26.2917	-0.108461	30.0184	-0.079088	28.7198
		-0.010976	7.40702	-0.0257551	13.8851	-0.084302	26.7595	-0.108461	30.3013	-0.0792	28.7315
		-0.011	7.8084	-0.025902	14.66	-0.0844816	27.1797	-0.108461	30.5992	-0.07932	28.7574
		-0.010992	8.35742	-0.0260041	14.7082	-0.0844163	26.1193	-0.10849	30.8999	-0.079424	28.7755
		-0.011016	8.81328	-0.025951	13.9933	-0.084298	26.8943	-0.108461	31.0068	-0.079544	28.7911
		-0.011064	9.11525	-0.0258	13.5823	-0.0844939	26.9961	-0.108437	31.1336	-0.079632	28.7988
		-0.011112	9.16838	-0.0257347	13.7435	-0.0843388	26.2502	-0.108445	31.3285	-0.07972	28.8105
		-0.011048	9.06989	-0.0257265	14.4788	-0.0843837	27.0793	-0.108449	31.3068	-0.079784	28.8235
		-0.010944	9.03749	-0.0258082	15.4217	-0.0844531	26.8765	-0.108396	31.3187	-0.079808	28.8429
		-0.01096	9.25771	-0.0259429	15.6979	-0.0843673	26.7014	-0.108465	31.4607	-0.07992	28.8649
		-0.011024	9.64344	-0.025951	15.0776	-0.084449	27.3145	-0.108482	31.3015	-0.079984	28.887
		-0.011048	9.9877	-0.0258653	14.4829	-0.0844571	26.7682	-0.108465	31.0986	-0.080072	28.9051
		-0.011056	9.99922	-0.0257755	14.407	-0.0843184	27.074	-0.108486	31.244	-0.080176	28.9207
		-0.011024	9.84019	-0.0257714	14.8041	-0.0844857	27.6951	-0.10851	31.1568	-0.080232	28.9375
		-0.010992	9.71755	-0.0258163	15.4046	-0.0843388	27.2114	-0.108461	31.1251	-0.080336	28.9505
		-0.010944	9.68789	-0.0258694	15.6953	-0.0843347	27.9653	-0.108482	31.3669	-0.080448	28.9686
		-0.010904	9.82738	-0.0258898	15.3464	-0.0845633	28.2144	-0.108457	31.511	-0.08056	28.992
		-0.010936	10.2183	-0.0258122	14.7452	-0.0844	27.2597	-0.108441	31.4667	-0.080672	29.0153
		-0.011032	10.6381	-0.0257388	14.8403	-0.0844163	28.2646	-0.108441	31.4323	-0.080744	29.0282
		-0.01116	10.7509	-0.0257755	15.4342	-0.0846245	27.8035	-0.108441	31.1238	-0.080808	29.0425
		-0.011192	10.3649	-0.0258612	16.0011	-0.0843878	27.3337	-0.108433	31.1997	-0.080872	29.058
		-0.011144	9.61762	-0.0259184	16.208	-0.0844286	28.3849	-0.108465	31.164	-0.080968	29.0775
		-0.011072	8.90659	-0.0259388	15.9788	-0.0845837	28.1405	-0.108461	31.1415	-0.081048	29.1008
		-0.010952	8.41954	-0.0258408	15.4766	-0.0843224	27.5062	-0.108478	31.4481	-0.081128	29.1203
		-0.010904	8.22384	-0.0257837	15.6577	-0.0843592	28.7833	-0.108461	31.5095	-0.08116	29.1423
		-0.010896	8.31326	-0.0258082	16.1644	-0.0845469	28.3393	-0.108441	31.2195	-0.081232	29.1578
		-0.01088	8.72774	-0.0258571	16.5212	-0.0842816	27.7672	-0.10842	31.2241	-0.081384	29.1747
		-0.010944	9.27442	-0.025902	16.5331	-0.0844082	28.9973	-0.108412	31.0167	-0.08148	29.1825
		-0.011064	9.69533	-0.0258939	16.0878	-0.0846082	28.3776	-0.108404	30.6876	-0.081608	29.2071
		-0.011168	9.59294	-0.0257918	15.7119	-0.0843755	27.4302	-0.108424	30.6764	-0.081664	29.2265
		-0.011144	8.90549	-0.0257714	16.0211	-0.0843918	28.6206	-0.108441	30.5733	-0.081704	29.2408
		-0.01112	7.88866	-0.0258082	16.4612	-0.0846122	28.4324	-0.108441	30.3752	-0.08172	29.2563
		-0.011032	6.95491	-0.0258367	16.6005	-0.0843102	27.4797	-0.108457	30.4095	-0.081792	29.2745
		-0.010968	6.41366	-0.0258653	16.4433	-0.0843469	28.8168	-0.108449	30.2456	-0.08184	29.2913
		-0.010928	6.16013	-0.0258408	15.7688	-0.0845755	28.729	-0.108457	30.0071	-0.08192	29.3069
		-0.01096	6.0876	-0.0257061	15.3591	-0.084351	27.7176	-0.108469	29.8472	-0.081984	29.3315
		-0.010976	6.10056	-0.0256776	15.817	-0.0843878	28.6537	-0.108465	29.423	-0.082032	29.3509
		-0.011056	6.03446	-0.0257673	16.5021	-0.0846	28.3842	-0.108473	29.2084	-0.082112	29.3652
		-0.011152	5.75582	-0.0258571	16.6401	-0.0844245	27.9105	-0.108469	28.9943	-0.082184	29.3782
		-0.011088	5.37869	-0.0258694	16.2899	-0.0844857	28.6134	-0.108478	28.6032	-0.082304	29.4054
		-0.011016	5.06765	-0.0258367	15.7514	-0.0845265	28.0895	-0.108453	28.2563	-0.082392	29.4313
		-0.01096	4.84354	-0.0258	15.5446	-0.0843918	28.0988	-0.108478	28.072	-0.08248	29.4456
		-0.01096	4.7567	-0.0258245	15.8353	-0.0845143	28.7944	-0.108453	27.6181	-0.082512	29.4546
		-0.010976	4.79947	-0.0258612	16.2165	-0.0844367	27.8715	-0.108465	27.3491	-0.08252	29.4792
		-0.011016	4.83058	-0.0259306	16.3183	-0.0843469	28.2831	-0.108465	27.2962	-0.082576	29.4961
		-0.011048	4.64443	-0.0259469	15.8511	-0.0845102	28.3855	-0.108478	27.1667	-0.082672	29.5142
		-0.011088	4.31702	-0.0258816	15.0755	-0.0843551	27.4156	-0.108461	26.9433	-0.082728	29.5246
		-0.01104	3.9193	-0.0257796	14.8476	-0.0843061	28.1847	-0.108453	26.769	-0.08276	29.5453
		-0.010992	3.64325	-0.0257755	15.2909	-0.0846286	28.5309	-0.108465	26.7551	-0.0828	29.5648
		-0.010904	3.55771	-0.0258612	15.6603	-0.0844286	27.2161	-0.108457	26.5589	-0.08288	29.5855
		-0.010904	3.67435	-0.025902	15.4906	-0.0843878	28.3116	-0.108445	26.516	-0.082944	29.592
		-0.010944	3.80136	-0.0258612	14.96	-0.0846082	28.1656	-0.108465	26.4711	-0.083	29.6153
		-0.011032	3.86616	-0.0258122	14.5385	-0.0843633	26.9262	-0.108453	26.3693	-0.083024	29.6243
		-0.011072	3.91152	-0.0258122	14.5226	-0.0842898	27.7236	-0.108408	26.3753	-0.083104	29.6501
		-0.011112	3.90634	-0.0258449	14.6996	-0.0845347	28.0215	-0.108441	26.6442	-0.083168	29.6654
		-0.011152	3.8195	-0.0258898	14.7915	-0.0843673	26.8964	-0.108441	26.6158	-0.083264	29.6858
		-0.011136	3.60178	-0.0259306	14.582	-0.0843796	27.8682	-0.108412	26.6554	-0.083352	29.6973
		-0.011056	3.36202	-0.0258776	14.0204	-0.0845959	27.6712	-0.108429	27.0724	-0.083408	29.7179
		-0.010992	3.21816	-0.0257878	13.782	-0.0843551	26.6584	-0.108449	26.964	-0.08344	29.7399
		-0.01092	3.25704	-0.0257837	14.1711	-0.0843551	27.5662	-0.108392	26.7071	-0.08352	29.7632
		-0.010928	3.51494	-0.0258735	14.4994	-0.0845102	27.3118	-0.108392	26.8425	-0.08356	29.7813
		-0.010976	3.89856	-0.0258816	14.4604	-0.084302	26.9313	-0.108416	27.0962	-0.083592	29.7917
		-0.011	4.37126	-0.025902	14.1254	-0.0843918	27.7988	-0.108412	27.0446	-0.083624	29.802
		-0.010976	4.80624	-0.0258531	13.793	-0.0844	27.4434	-0.108412	27.2666	-0.08364	29.8267
		-0.010992	5.23483	-0.0258245	13.8102	-0.0842776	27.5451	-0.108429	27.8388	-0.083664	29.8552
		-0.010992	5.65085	-0.0258408	14.2132	-0.0844245	28.254	-0.108461	28.1671	-0.083744	29.8668
		-0.011016	6.00984	-0.0259265	14.4393	-0.0843633	27.5239	-0.108469	28.3924	-0.083776	29.8785
		-0.011016	6.16536	-0.0259633	14.2674	-0.0842449	28.0987	-0.108457	28.5661	-0.083816	29.885
		-0.011	6.18091	-0.0259102	13.6761	-0.0845102	28.7917	-0.108469	28.9988	-0.083888	29.9109
		-0.010992	6.29846	-0.0257796	13.3762	-0.0843551	27.5742	-0.108486	29.2102	-0.08396	29.9329
		-0.010984	6.63494	-0.0257265	13.871	-0.084249	28.3393	-0.108469	29.4975	-0.083976	29.9563
		-0.011016	7.10117	-0.0257633	14.7629	-0.0845265	28.7905	-0.108457	29.8663	-0.083968	29.9653
		-0.011096	7.46016	-0.0258327	15.2367	-0.084351	27.7573	-0.108486	30.0916	-0.084	29.9887
		-0.011072	7.56773	-0.025898	15.0862	-0.084298	28.4926	-0.108465	30.2271	-0.08408	30.0042
		-0.011008	7.52237	-0.0258816	14.4089	-0.0845306	28.6842	-0.108461	30.3501	-0.084176	30.0146
		-0.010992	7.4809	-0.0257551	14.0614	-0.0843673	28.223	-0.108457	30.2806	-0.084232	30.034
		-0.011024	7.5107	-0.0257388	14.4017	-0.0844327	28.735	-0.108441	30.2601	-0.08428	30.0535
		-0.010992	7.74509	-0.0257673	15.1985	-0.0844367	28.5652	-0.108437	30.5231	-0.084344	30.0716
		-0.010992	8.16062	-0.0258245	15.6411	-0.0844163	28.6411	-0.108437	30.4769	-0.084392	30.0924
		-0.011016	8.56061	-0.0258408	15.6199	-0.084498	29.1294	-0.1084	30.508	-0.084416	30.1092
		-0.011104	8.742	-0.0258204	15.1152	-0.0844816	28.3425	-0.108416	30.5959	-0.084472	30.1248
		-0.011128	8.67331	-0.0257224	14.9803	-0.0843347	28.8711	-0.108416	30.7102	-0.084528	30.139
		-0.01108	8.49576	-0.0257184	15.3595	-0.0845551	28.8664	-0.108433	30.5965	-0.0846	30.161
		-0.011072	8.37653	-0.0257878	16.0519	-0.0843633	28.363	-0.108453	30.6711	-0.084624	30.1766
		-0.010992	8.36616	-0.0258449	16.4286	-0.0844082	28.9371	-0.108486	30.6493	-0.084656	30.1947
		-0.010976	8.41152	-0.0258939	16.3091	-0.0844571	28.8003	-0.108478	30.4696	-0.08468	30.209
		-0.010968	8.50483	-0.0258612	15.7865	-0.0844571	28.8479	-0.10849	30.3104	-0.084752	30.2258
		-0.010992	8.76792	-0.0257918	15.7482	-0.0845388	29.2437	-0.10849	30.3448	-0.084856	30.2544
		-0.01108	9.01934	-0.0257837	16.1836	-0.0844653	28.5922	-0.108486	29.9808	-0.084904	30.2686
		-0.011144	9.04915	-0.0258367	16.6308	-0.0843918	29.1538	-0.108478	29.766	-0.084936	30.2842
		-0.011048	8.88586	-0.0258612	16.7709	-0.0845673	29.1479	-0.108457	29.7013	-0.084968	30.3049
		-0.011008	8.75885	-0.0258776	16.6678	-0.0843755	28.7264	-0.108449	29.3002	-0.085056	30.3192
		-0.011032	8.64998	-0.0258816	16.7089	-0.0844367	29.465	-0.108437	28.9183	-0.08508	30.3308
		-0.01108	8.3483	-0.025902	16.7935	-0.0845306	28.9926	-0.108445	28.6554	-0.085152	30.3516
		-0.011088	7.80706	-0.0259061	16.882	-0.0843633	28.8631	-0.108441	28.2794	-0.085192	30.371
		-0.01104	7.14912	-0.0259347	16.9652	-0.0845061	29.6056	-0.108441	27.8777	-0.085272	30.3878
		-0.011032	6.63494	-0.0259265	16.7974	-0.0844694	28.528	-0.108482	27.762	-0.085328	30.4047
		-0.010992	6.23885	-0.0258612	16.4471	-0.084302	28.8584	-0.108461	27.47	-0.08544	30.4176
		-0.010944	5.93856	-0.0258408	16.5785	-0.0844776	29.1161	-0.108457	27.1753	-0.085576	30.4397
		-0.010952	5.80378	-0.0258857	16.854	-0.084302	28.1265	-0.108453	27.0774	-0.085664	30.4591
		-0.010936	5.8297	-0.0258939	16.9149	-0.0842245	28.7178	-0.108469	26.8799	-0.085768	30.4799
		-0.011	5.91782	-0.0259143	16.8033	-0.0844327	28.7634	-0.108437	26.5139	-0.085864	30.4902
		-0.011056	5.9269	-0.0259143	16.2754	-0.0842857	28.1965	-0.108469	26.4795	-0.085968	30.5019
		-0.011128	5.80766	-0.0258286	16.0786	-0.0843714	28.805	-0.108473	26.3593	-0.086	30.5226
		-0.011168	5.42794	-0.0257796	16.4538	-0.0844735	28.2976	-0.108473	26.0461	-0.086048	30.5395
		-0.011152	4.82707	-0.0258571	16.9448	-0.0843959	28.1588	-0.108494	26.054	-0.086104	30.5615
		-0.011016	4.23139	-0.025902	17.0254	-0.0844571	28.3438	-0.108502	25.8545	-0.086184	30.5771
		-0.010872	3.83506	-0.0259061	16.6699	-0.0844286	27.7598	-0.108457	25.507	-0.086264	30.5887
		-0.010864	3.69379	-0.0258286	16.1089	-0.0844367	28.2123	-0.108449	25.6041	-0.086376	30.5991
		-0.01096	3.76378	-0.0257837	16.0647	-0.0845388	28.0273	-0.108461	25.6147	-0.08648	30.6159
		-0.010992	3.87005	-0.0258	16.4888	-0.0844286	27.7869	-0.108437	25.3512	-0.08656	30.6341
		-0.011016	3.89078	-0.0258612	16.7346	-0.0844653	27.8457	-0.108429	25.3637	-0.086616	30.6561
		-0.01108	3.80006	-0.0258857	16.5542	-0.0844327	27.7116	-0.108478	25.6478	-0.086672	30.6743
		-0.011112	3.57067	-0.0258898	15.8776	-0.0843918	27.7804	-0.108461	25.5282	-0.086736	30.6963
		-0.01108	3.28949	-0.025849	15.3061	-0.0844653	27.8174	-0.108433	25.4364	-0.086776	30.7092
		-0.011032	3.0528	-0.0258082	15.2633	-0.0843837	27.2651	-0.108437	25.5718	-0.086832	30.7183
		-0.010984	2.86406	-0.0258735	15.4562	-0.0844612	28.1114	-0.108453	25.7813	-0.086912	30.7326
		-0.010984	2.70744	-0.025902	15.4423	-0.0845265	27.4653	-0.108429	25.5771	-0.087016	30.7533
		-0.010976	2.56618	-0.0259061	15.1636	-0.0843959	27.5803	-0.108445	25.7291	-0.087104	30.7831
		-0.010968	2.50526	-0.0258653	14.8312	-0.0845102	28.1742	-0.108429	26.1234	-0.087192	30.8013
		-0.010952	2.54285	-0.025902	14.736	-0.0844735	27.5334	-0.108416	26.3969	-0.08724	30.8155
		-0.010936	2.65949	-0.0258857	14.8318	-0.0843306	27.8736	-0.10842	26.7438	-0.087344	30.8298
		-0.010984	2.77483	-0.0259306	14.8061	-0.0845224	28.1934	-0.108441	27.172	-0.08748	30.8492
		-0.010984	2.9856	-0.0259061	14.6924	-0.0843551	27.3979	-0.108433	27.5783	-0.087584	30.87
		-0.010992	3.34282	-0.025902	14.5675	-0.0844122	28.1233	-0.108449	27.9212	-0.087656	30.8868
		-0.01104	3.78322	-0.0258531	14.4723	-0.084502	27.9304	-0.108478	28.2754	-0.087712	30.9024
		-0.01108	4.19016	-0.0258571	14.4723	-0.0844122	27.785	-0.10849	28.58	-0.087784	30.9179
		-0.011088	4.55784	-0.025849	14.4445	-0.0844531	28.1537	-0.108457	28.8588	-0.0878	30.936
		-0.011032	4.91246	-0.0258694	14.2952	-0.0844122	27.7612	-0.108461	29.215	-0.087904	30.9529
		-0.011072	5.27501	-0.0258408	14.0044	-0.0843061	28.1365	-0.108473	29.433	-0.08796	30.9775
		-0.011072	5.48496	-0.0258041	13.943	-0.0844653	28.5349	-0.108433	29.6597	-0.088096	30.9957
		-0.011056	5.54976	-0.0257959	14.0441	-0.0843347	27.8775	-0.1084	29.8267	-0.088144	31.0151
		-0.011016	5.53939	-0.0258408	14.1631	-0.0843224	28.7615	-0.108453	30.2014	-0.088248	31.0371
		-0.010976	5.62234	-0.0258653	14.0971	-0.084551	28.5996	-0.108449	30.132	-0.088344	31.0462
		-0.011	5.88144	-0.0258653	13.6485	-0.0843265	27.8491	-0.108424	30.2799	-0.088472	31.0631
		-0.011008	6.32419	-0.0257837	13.4015	-0.0843347	29.0124	-0.108461	30.5415	-0.088552	31.0747
		-0.011	6.86674	-0.0257959	13.6611	-0.0846041	29.0765	-0.108482	30.6585	-0.088656	31.0903
		-0.011016	7.37722	-0.0258286	13.9175	-0.0843265	28.1317	-0.108469	30.7311	-0.088752	31.0993
		-0.011032	7.7736	-0.0258531	13.9121	-0.0843592	29.4319	-0.108478	30.9373	-0.08884	31.1304
		-0.011032	8.05046	-0.0258327	13.6922	-0.0845592	29.1603	-0.108506	31.1117	-0.088992	31.1603
		-0.01108	8.2068	-0.0258082	13.5481	-0.0843714	28.2903	-0.108494	31.0939	-0.089104	31.1719
		-0.011064	8.1901	-0.0257918	13.6353	-0.0843469	29.2026	-0.108486	31.2069	-0.089184	31.1862
		-0.010992	8.12918	-0.0258163	13.9643	-0.0846449	29.4306	-0.10849	31.2624	-0.089248	31.2043
		-0.010928	8.29757	-0.0258327	14.1493	-0.0843714	28.4046	-0.108486	31.191	-0.089328	31.2262
		-0.01096	8.65906	-0.0258939	14.1036	-0.0844	29.5396	-0.108433	30.9988	-0.089408	31.2454
		-0.011048	9.01416	-0.0258653	13.7322	-0.0845918	29.3183	-0.108457	31.0767	-0.089512	31.2594
		-0.01116	9.07248	-0.0257796	13.6418	-0.0843143	28.1694	-0.108486	30.8891	-0.089608	31.2798
		-0.011112	8.85994	-0.0258082	14.0891	-0.0842816	29.087	-0.108465	30.6605	-0.089696	31.2965
		-0.011024	8.59555	-0.0258898	14.4901	-0.084498	28.8637	-0.10849	30.8771	-0.089792	31.312
		-0.010968	8.52946	-0.0258653	14.5807	-0.0842898	28.2949	-0.108518	30.8441	-0.089848	31.3288
		-0.011016	8.63573	-0.0258531	14.5536	-0.0843306	29.2219	-0.108461	30.675	-0.089936	31.3444
		-0.011008	8.89493	-0.0258571	14.6633	-0.0845102	28.8024	-0.108453	30.8712	-0.090048	31.3664
		-0.010984	9.31205	-0.0257918	14.8701	-0.084298	28.3875	-0.108449	30.7516	-0.090152	31.3859
		-0.011024	9.70685	-0.0258	15.1793	-0.0844531	29.1743	-0.108429	30.5739	-0.090232	31.4027
		-0.011104	9.76517	-0.0258735	15.3405	-0.0844653	28.2573	-0.108449	30.5507	-0.090376	31.4234
		-0.011128	9.57509	-0.0258939	14.8827	-0.0843673	28.4059	-0.108457	30.2904	-0.090488	31.4403
		-0.01108	9.36797	-0.0257959	14.2821	-0.0845184	28.7224	-0.108457	30.1847	-0.090608	31.4584
		-0.011016	9.23059	-0.0257388	14.4077	-0.0844571	28.2302	-0.108469	30.1108	-0.090696	31.4805
		-0.010984	9.13598	-0.0258041	15.1074	-0.0844449	28.4978	-0.108441	29.721	-0.09084	31.5051
		-0.010992	9.0971	-0.0258653	15.4715	-0.0845143	28.3082	-0.108453	29.6002	-0.09092	31.5155
		-0.011024	9.08803	-0.0258367	15.5091	-0.0844122	28.0948	-0.108465	29.3702	-0.090992	31.5349
		-0.011024	9.06082	-0.0258041	15.4067	-0.084449	28.4073	-0.108445	28.8562	-0.091112	31.5556
		-0.011	8.97787	-0.0257918	15.4245	-0.0844245	27.8054	-0.108433	28.5932	-0.091248	31.5738
		-0.011	8.77699	-0.0257592	15.6147	-0.0843592	27.9713	-0.108478	28.4472	-0.091312	31.5919
		-0.011024	8.46336	-0.0257959	15.8995	-0.0844571	27.9263	-0.108482	28.2918	-0.091368	31.6101
		-0.011	8.27414	-0.0258408	15.9384	-0.0844327	27.5187	-0.108457	28.0765	-0.091488	31.6256
		-0.01092	8.32987	-0.0258898	15.6774	-0.0844857	27.6356	-0.108457	27.9457	-0.091568	31.6451
		-0.01092	8.56963	-0.0258245	15.4561	-0.0844776	27.2656	-0.108469	27.99	-0.091624	31.6606
		-0.01104	8.89622	-0.0258122	15.5116	-0.0843918	27.3601	-0.108437	27.8089	-0.09168	31.6813
		-0.011128	9.0349	-0.025849	15.7626	-0.084551	27.5834	-0.108429	27.661	-0.091808	31.7021
		-0.011152	8.8392	-0.0258735	15.8182	-0.0845102	26.5501	-0.108453	27.7079	-0.09192	31.7176
		-0.011096	8.37811	-0.0258694	15.5896	-0.0843837	27.2015	-0.108478	27.9305	-0.092032	31.7384
		-0.011096	7.76947	-0.0258122	15.0816	-0.0846327	27.4169	-0.108449	27.912	-0.092104	31.7552
		-0.01108	7.1219	-0.025751	14.9607	-0.0844612	26.0513	-0.108465	28.0983	-0.092232	31.7772
		-0.011008	6.6155	-0.0257633	15.2706	-0.084351	27.0198	-0.108445	28.2521	-0.092352	31.7993
		-0.011008	6.23755	-0.0258204	15.4423	-0.0845306	27.0244	-0.108457	28.5415	-0.092424	31.8187
		-0.010952	5.93856	-0.0258531	15.3248	-0.0843551	25.9132	-0.108449	28.4458	-0.092488	31.8369
		-0.010928	5.67158	-0.0258694	14.8431	-0.0843469	26.745	-0.108453	28.4683	-0.092568	31.8576
		-0.010944	5.46293	-0.0258163	14.4295	-0.0844408	26.6743	-0.108453	28.6997	-0.09264	31.8719
		-0.010944	5.33851	-0.0257837	14.4486	-0.0843224	26.161	-0.108482	28.7532	-0.09272	31.8952
		-0.010984	5.31778	-0.0258531	14.6587	-0.0843878	26.7509	-0.108465	28.9964	-0.092824	31.9133
		-0.011008	5.3113	-0.0258571	14.5265	-0.0844571	26.486	-0.108469	29.4125	-0.092968	31.9315
		-0.01104	5.16874	-0.0258571	14.3825	-0.0843592	26.5382	-0.108465	29.7065	-0.093056	31.9405
		-0.011024	4.88645	-0.0258612	14.2352	-0.0845429	26.9564	-0.108465	30.0738	-0.0932	31.9574
		-0.010992	4.65106	-0.0258612	14.1335	-0.0845143	26.0843	-0.108449	30.4518	-0.09328	31.9729
		-0.010912	4.66536	-0.025898	14.0853	-0.0843959	26.6894	-0.108465	30.7127	-0.09332	31.9924
		-0.010936	4.88002	-0.0259061	13.9334	-0.0846	27.0832	-0.108457	30.8615	-0.093384	32.0118
		-0.01096	5.21539	-0.0259061	13.6348	-0.0844204	26.0261	-0.108457	31.2182	-0.093456	32.0287
		-0.011032	5.47459	-0.0258776	13.3995	-0.0843755	27.0693	-0.108478	31.1542	-0.093536	32.0403
		-0.01104	5.52125	-0.0258857	13.342	-0.0845347	27.3058	-0.108482	31.02	-0.09364	32.0598
		-0.011048	5.46163	-0.0258816	13.3896	-0.0844163	26.9438	-0.108445	30.9639	-0.093696	32.0779
		-0.010976	5.43571	-0.0259224	13.3301	-0.0844735	27.5325	-0.108494	31.201	-0.093768	32.1064
		-0.010968	5.48366	-0.0258612	13.0888	-0.0845224	27.3138	-0.108457	31.0161	-0.093776	32.1233
		-0.010992	5.55106	-0.0258408	12.9745	-0.0844327	27.393	-0.108433	31.2586	-0.093872	32.1349
		-0.011016	5.66899	-0.0258122	13.0281	-0.084502	27.7829	-0.108453	31.5797	-0.093928	32.1544
		-0.011008	5.98757	-0.0258327	13.2732	-0.0844327	27.3567	-0.108445	31.3782	-0.094016	32.1673
		-0.011032	6.47568	-0.0258735	13.4516	-0.0843755	27.9262	-0.108412	31.3042	-0.094064	32.1933
		-0.011024	6.95731	-0.0259673	13.2435	-0.0845633	28.1475	-0.108441	31.5652	-0.094176	32.2166
		-0.01104	7.41091	-0.0259061	12.4137	-0.0843918	27.6138	-0.108469	31.2923	-0.094232	32.2296
		-0.011072	7.78157	-0.0258408	12.1071	-0.0844245	28.503	-0.108437	31.0042	-0.094296	32.2464
		-0.011072	7.93838	-0.0258408	12.4796	-0.0845633	27.9547	-0.108453	31.1871	-0.094392	32.2581
		-0.010984	7.9332	-0.0259306	13.0796	-0.0843959	27.7922	-0.108469	31.2545	-0.09448	32.2827
		-0.010992	8.04562	-0.0259918	13.246	-0.0844816	28.5514	-0.108453	31.0259	-0.094544	32.3034
		-0.011	8.41838	-0.0260163	12.8556	-0.084502	27.7341	-0.108449	31.1732	-0.09464	32.3216
		-0.010968	8.93251	-0.0258776	12.0806	-0.0843551	27.8848	-0.108453	31.3087	-0.094656	32.3384
		-0.010984	9.33946	-0.0257796	11.9247	-0.0845184	28.5739	-0.108461	31.3186	-0.094696	32.3604
		-0.010976	9.62678	-0.0257429	12.2993	-0.0843837	27.7553	-0.108461	31.0365	-0.094736	32.3773
		-0.010968	9.74203	-0.0258286	12.7407	-0.0843224	28.3354	-0.108478	30.9862	-0.094768	32.3916
		-0.011008	9.74477	-0.0258735	12.8404	-0.0845469	29.0014	-0.108478	30.8329	-0.094872	32.4084
		-0.011016	9.86774	-0.0259143	12.5688	-0.0844327	27.8497	-0.108457	30.595	-0.094992	32.4214
		-0.011024	10.1576	-0.0258612	12.3726	-0.0843265	28.6716	-0.108469	30.3386	-0.095096	32.4434
		-0.011016	10.4969	-0.0258531	12.475	-0.0846041	28.7998	-0.108457	30.0942	-0.095144	32.4693
		-0.01104	10.5332	-0.025902	12.6593	-0.0843918	27.6905	-0.108445	29.6337	-0.095208	32.4875
		-0.01104	10.3699	-0.025902	12.6924	-0.0843347	28.5019	-0.108429	29.3001	-0.095296	32.4939
		-0.011008	10.1301	-0.0259102	12.5978	-0.0845878	28.7649	-0.108449	29.0345	-0.09536	32.5056
		-0.010936	10.064	-0.025902	12.5945	-0.0843959	28.0157	-0.108445	28.6103	-0.095392	32.5328
		-0.01092	10.2662	-0.0258776	12.8001	-0.0844082	28.8144	-0.108445	28.2879	-0.09544	32.5523
		-0.010928	10.725	-0.0258857	13.1159	-0.0845143	28.492	-0.108457	28.1187	-0.095456	32.5678
		-0.01104	11.1306	-0.0259061	13.3571	-0.0843388	28.0757	-0.108449	27.8618	-0.095488	32.5834
		-0.01108	11.1617	-0.0259306	13.3988	-0.0844	28.5653	-0.108457	27.5559	-0.095504	32.5976
		-0.011064	10.9453	-0.0258776	13.1325	-0.084449	27.8213	-0.108461	27.1925	-0.095568	32.6158
		-0.011032	10.6537	-0.0258082	13.2336	-0.084298	27.8392	-0.108478	27.1113	-0.095672	32.6365
		-0.011008	10.4204	-0.0257959	13.8249	-0.0844286	28.0836	-0.108494	26.9567	-0.095736	32.6533
		-0.010984	10.3012	-0.0258939	14.2226	-0.0843429	27.4487	-0.10849	26.7128	-0.095808	32.6715
		-0.010984	10.3154	-0.0259102	14.3137	-0.0843265	27.6971	-0.108469	26.5206	-0.095896	32.6935
		-0.010984	10.4567	-0.025898	14.2761	-0.0843959	27.4929	-0.108457	26.6216	-0.095888	32.7091
		-0.010984	10.7405	-0.0259061	14.3514	-0.084351	27.1844	-0.108441	26.3487	-0.095936	32.735
		-0.011032	11.1343	-0.0258939	14.5754	-0.0843918	27.2927	-0.10842	26.0739	-0.096048	32.7544
		-0.01112	11.2729	-0.0258898	14.8244	-0.0843918	26.8025	-0.108445	26.0409	-0.096104	32.7765
		-0.011112	10.9464	-0.025902	14.9864	-0.0843184	27.0859	-0.108478	25.9967	-0.096128	32.7946
		-0.011088	10.2652	-0.0258653	14.9375	-0.0843878	27.0099	-0.108473	25.8282	-0.096216	32.8011
		-0.011056	9.50102	-0.0258449	14.9653	-0.0843306	26.6591	-0.108465	25.7998	-0.096304	32.8128
		-0.011008	8.91307	-0.0258367	15.0294	-0.0844204	27.072	-0.108465	25.6735	-0.09636	32.8385
		-0.010928	8.70053	-0.0258204	15.1945	-0.0844612	26.7067	-0.108457	25.6649	-0.09644	32.8577
		-0.010936	8.7433	-0.0258449	15.3048	-0.0843673	26.774	-0.108429	25.7092	-0.096488	32.8731
		-0.011032	8.80421	-0.0258694	15.0907	-0.084502	27.0277	-0.108445	25.8181	-0.096528	32.8884
		-0.011064	8.79902	-0.0258204	15.0128	-0.0844082	26.5316	-0.108449	25.99	-0.09656	32.9103
		-0.011064	8.71867	-0.0258449	15.1971	-0.0844327	26.9194	-0.108461	26.3396	-0.09664	32.9295
		-0.011104	8.52168	-0.0258898	15.246	-0.0845061	26.7648	-0.108473	26.6105	-0.09668	32.9489
		-0.011104	8.07634	-0.0258776	15.1351	-0.0844163	26.6856	-0.108469	26.6627	-0.096768	32.9671
		-0.011048	7.50398	-0.0258816	15.069	-0.0844939	27.1229	-0.108461	26.6073	-0.096808	32.9878
		-0.010992	6.9625	-0.0259102	14.921	-0.0844571	26.8448	-0.108461	26.9151	-0.096808	32.9969
		-0.010976	6.54946	-0.0258612	14.7657	-0.0844245	27.2748	-0.108469	27.1159	-0.096904	33.0137
		-0.010984	6.19742	-0.0258571	14.7901	-0.0844449	27.5107	-0.108453	27.11	-0.097008	33.0345
		-0.010976	5.8932	-0.0258735	14.7611	-0.0844408	27.6864	-0.108469	27.6207	-0.097088	33.0552
		-0.01096	5.634	-0.0258816	14.6276	-0.084449	28.2123	-0.108465	28.1129	-0.097152	33.0798
		-0.01096	5.46811	-0.0258571	14.5114	-0.0844776	27.989	-0.108465	28.2708	-0.097264	33.0993
		-0.010984	5.42923	-0.0259061	14.512	-0.0843714	28.3531	-0.108469	28.5979	-0.097376	33.1135
		-0.011	5.4085	-0.0259143	14.4479	-0.0845918	28.8209	-0.108478	29.0393	-0.097416	33.1278
		-0.011048	5.21798	-0.0259143	14.3494	-0.0843878	27.9819	-0.108453	29.2711	-0.09744	33.1524
		-0.01104	4.94328	-0.025898	14.1003	-0.0843388	28.7173	-0.108478	29.6815	-0.097496	33.1654
		-0.010984	4.79429	-0.0258776	13.8956	-0.0845469	28.8765	-0.108482	29.8908	-0.097576	33.1822
		-0.010952	4.80077	-0.0258449	13.8599	-0.0843184	27.9165	-0.108473	29.9166	-0.097664	33.2016
		-0.010968	4.88621	-0.0258939	13.9346	-0.0842898	28.9286	-0.108469	30.1234	-0.097744	33.2224
		-0.010984	4.92898	-0.0258939	13.8137	-0.0845306	28.8493	-0.108461	30.1135	-0.097792	33.2418
		-0.011048	4.85659	-0.0258653	13.6763	-0.0842735	27.894	-0.108429	30.0355	-0.097864	33.2626
		-0.011008	4.63416	-0.0258408	13.5812	-0.0843347	28.8974	-0.108437	30.1981	-0.097968	33.2794
		-0.010968	4.3897	-0.0258449	13.568	-0.0844327	28.4257	-0.108424	30.2224	-0.098056	33.2976
		-0.010944	4.34698	-0.0258571	13.4398	-0.0843184	28.2474	-0.108416	30.159	-0.09816	33.3183
		-0.01096	4.46621	-0.0258612	13.2832	-0.0844041	28.5664	-0.10842	30.2925	-0.098232	33.339
		-0.011032	4.61098	-0.0258816	13.0281	-0.0844449	28.2064	-0.108441	30.2409	-0.098288	33.352
		-0.011	4.69608	-0.0258898	12.8656	-0.0843429	28.4191	-0.108441	30.2786	-0.09836	33.3649
		-0.011	4.76448	-0.0258653	12.9289	-0.0845551	28.7614	-0.108424	30.4815	-0.098416	33.3883
		-0.010936	5.0171	-0.0259184	13.2771	-0.084449	28.1152	-0.108416	30.4776	-0.098472	33.4077
		-0.01096	5.44738	-0.0259265	13.3446	-0.0844163	28.9999	-0.108441	30.4551	-0.098544	33.4233
		-0.010952	5.94226	-0.0259102	13.2164	-0.0845592	28.8671	-0.108441	30.3447	-0.098624	33.4401
		-0.011008	6.26592	-0.0258857	13.0796	-0.0843959	28.5328	-0.10842	30.1003	-0.09872	33.457
		-0.011024	6.38875	-0.0258245	13.0499	-0.0844408	29.0508	-0.108453	29.7607	-0.0988	33.4738
		-0.011	6.39648	-0.0257796	13.3009	-0.0843837	28.4549	-0.108461	29.4634	-0.098912	33.4829
		-0.010952	6.59578	-0.0258245	13.4238	-0.0843878	28.6042	-0.108457	29.0082	-0.098968	33.501
		-0.010952	6.94694	-0.0258776	13.2804	-0.0845184	28.8269	-0.108437	28.8021	-0.099088	33.514
		-0.011008	7.34482	-0.0258041	12.9758	-0.0844571	28.4998	-0.108437	28.5424	-0.099224	33.5373
		-0.01104	7.5107	-0.0258041	12.9818	-0.0844612	29.1386	-0.108433	28.138	-0.099408	33.5762
		-0.011	7.52626	-0.0257551	13.365	-0.0845796	28.7541	-0.108429	27.801	-0.099672	33.6332
		-0.010952	7.53274	-0.0258367	13.8156	-0.0844	28.3419	-0.108437	27.7514	-0.099992	33.6967
		-0.010936	7.68043	-0.0258612	13.8454	-0.0844816	28.9847	-0.108465	27.3569	-0.100304	33.7499
		-0.010984	7.99488	-0.0258122	13.4899	-0.0844245	28.188	-0.108453	27.0774	-0.100624	33.8043
		-0.011	8.3495	-0.0257755	13.4106	-0.084298	28.4013	-0.108482	27.0821	-0.100936	33.8561
		-0.01108	8.61888	-0.0257878	13.6268	-0.084498	29.0395	-0.108494	26.8145	-0.101208	33.8989
		-0.011056	8.71738	-0.0258122	14.1871	-0.0844	28.0967	-0.108469	26.3936	-0.101528	33.9546
		-0.011048	8.77829	-0.0258694	14.5385	-0.0843347	28.7349	-0.108473	26.3468	-0.101904	34.0052
		-0.010976	8.90789	-0.0259102	14.3469	-0.084551	28.5102	-0.108473	26.1882	-0.1022	34.0596
		-0.010992	9.16838	-0.0258286	14.2431	-0.0843878	27.9566	-0.108429	25.8935	-0.102536	34.1063
		-0.011	9.26688	-0.0258327	14.4386	-0.0844041	28.2084	-0.108449	25.9622	-0.102816	34.1594
		-0.011024	9.23059	-0.0258204	14.3686	-0.0844449	27.9269	-0.108478	25.8472	-0.10308	34.2009
		-0.010976	9.33038	-0.0257755	14.3739	-0.0843959	27.8735	-0.108449	25.6225	-0.103328	34.2359
		-0.011016	9.5557	-0.0257592	14.7407	-0.0844327	27.9145	-0.108494	25.6774	-0.10356	34.2773
		-0.011096	9.60235	-0.0258327	15.0829	-0.0843796	27.4408	-0.108514	25.5512	-0.103904	34.324
		-0.011112	9.38866	-0.0258735	15.0578	-0.0844367	27.6139	-0.108498	25.316	-0.104272	34.3797
		-0.01108	9.16579	-0.0258204	15.0941	-0.0844898	27.3985	-0.108502	25.5222	-0.104576	34.4351
		-0.011024	8.8703	-0.0258122	15.2599	-0.0844327	27.4197	-0.108502	25.583	-0.10484	34.4646
		-0.010968	8.53464	-0.0258571	15.3867	-0.084449	27.5915	-0.108473	25.4284	-0.105184	34.5084
		-0.010936	8.36875	-0.0258735	15.5366	-0.0844449	27.3952	-0.108437	25.4515	-0.105544	34.5768
		-0.01096	8.418	-0.0258939	15.6463	-0.0844612	27.5828	-0.108441	25.581	-0.105912	34.6377
		-0.011	8.52038	-0.025898	15.7283	-0.0845061	27.4593	-0.108433	25.388	-0.106296	34.7012
		-0.010976	8.60851	-0.0259306	15.8585	-0.0844082	27.2796	-0.108445	25.5208	-0.106672	34.7699
		-0.010944	8.89882	-0.0259061	15.8651	-0.0845102	27.5432	-0.108445	25.7528	-0.107096	34.836
		-0.010968	9.38573	-0.0258776	15.8995	-0.0844816	27.3179	-0.108461	26.214	-0.10748	34.8995
		-0.011048	9.71342	-0.0258776	16.0138	-0.0844408	27.6258	-0.108449	26.479	-0.10788	34.9591
		-0.011112	9.47251	-0.0259061	16.0045	-0.0845184	27.6436	-0.108433	26.7202	-0.108176	35.0161
		-0.011128	8.77723	-0.025902	15.943	-0.0844082	27.4632	-0.108449	27.0228	-0.108416	35.0641
		-0.011088	7.84978	-0.0258939	15.7389	-0.0844449	27.8577	-0.108441	27.4568	-0.108528	35.0939
		-0.011016	6.91747	-0.0258776	15.6418	-0.0843837	27.6271	-0.108424	27.6206	-0.108624	35.112
		-0.01092	6.11962	-0.0258367	15.8439	-0.0843184	28.1318	-0.108433	28.1207	-0.108704	35.1302
		-0.010872	5.67806	-0.0258653	16.1564	-0.0845429	28.7238	-0.108453	28.6215	-0.108768	35.1444
		-0.010904	5.54458	-0.0258694	16.1902	-0.0844408	27.937	-0.108396	28.9393	-0.108888	35.1561
		-0.010984	5.6016	-0.025898	15.9245	-0.0844327	28.817	-0.108416	29.2545	-0.10896	35.1781
		-0.01104	5.67029	-0.025849	15.6867	-0.0845796	28.3809	-0.108404	29.4521	-0.109104	35.2015
		-0.011088	5.65085	-0.0258245	15.7561	-0.0843633	28.1331	-0.108404	29.7178	-0.109192	35.2131
		-0.011112	5.4409	-0.0258571	15.9596	-0.0843633	28.5869	-0.10842	30.0165	-0.10928	35.23
		-0.011064	5.10653	-0.0258939	16.0256	-0.0844245	28.2685	-0.108457	30.2741	-0.109376	35.2507
		-0.011	4.78032	-0.0259061	15.8492	-0.0843102	28.4905	-0.108429	30.3435	-0.109472	35.2702
		-0.010992	4.55141	-0.0258857	15.3444	-0.0844857	29.2205	-0.108461	30.683	-0.109528	35.2844
		-0.011016	4.31717	-0.0258571	15.1099	-0.0843796	28.3815	-0.108445	30.8204	-0.109568	35.3039
		-0.01104	4.08	-0.0258776	15.3398	-0.0843673	29.1063	-0.108449	30.9743	-0.109592	35.3194
		-0.010984	3.86616	-0.0259102	15.3042	-0.084498	29.025	-0.108429	30.9591	-0.109656	35.3388
		-0.010976	3.70675	-0.0259102	15.0875	-0.0843102	28.5447	-0.108433	31.2121	-0.10972	35.3583
		-0.011056	3.67176	-0.0258816	14.7836	-0.0842694	29.3243	-0.108424	31.3146	-0.109832	35.3738
		-0.011096	3.62381	-0.0258571	14.6739	-0.0844776	29.0778	-0.108449	31.3768	-0.109888	35.3907
		-0.011064	3.48384	-0.0258531	14.697	-0.0842286	28.6801	-0.108441	31.2096	-0.110024	35.4036
		-0.011064	3.27518	-0.0258531	14.6356	-0.0844163	29.4901	-0.108445	31.1237	-0.110128	35.4283
		-0.01104	3.13781	-0.0258408	14.514	-0.0843633	28.6378	-0.108482	31.1792	-0.110224	35.4542
		-0.010992	3.13262	-0.0258449	14.3692	-0.0843469	28.7792	-0.108449	31.0233	-0.110336	35.471
		-0.01104	3.22075	-0.0258163	14.2299	-0.0844082	28.8684	-0.108433	30.9585	-0.110424	35.484
		-0.011112	3.26222	-0.0258204	14.29	-0.0844	28.7211	-0.108437	31.0689	-0.110496	35.5008
		-0.011104	3.21043	-0.0258694	14.4116	-0.0844245	28.9708	-0.108473	31.2823	-0.110528	35.5216
		-0.011072	3.05928	-0.0258735	14.3739	-0.0844204	28.7693	-0.108457	31.1146	-0.11056	35.5332
		-0.011024	2.8537	-0.0258449	14.2392	-0.0844245	28.8222	-0.108498	30.9942	-0.110632	35.5514
		-0.011016	2.69966	-0.0258612	14.1751	-0.0844816	29.0376	-0.108498	30.9124	-0.110672	35.5656
		-0.010904	2.68411	-0.0258245	14.1117	-0.0844204	28.5527	-0.108502	30.7669	-0.110784	35.5825
		-0.010904	2.80838	-0.0258163	14.0575	-0.0844122	29.0165	-0.108486	30.4346	-0.110912	35.598
		-0.01092	3.11765	-0.0258327	13.9696	-0.0845429	28.6623	-0.108494	30.4834	-0.110984	35.6149
		-0.010968	3.52282	-0.0258286	13.7813	-0.0843224	28.2547	-0.108506	30.3711	-0.111088	35.6317
		-0.011032	3.94781	-0.0258367	13.7489	-0.0844122	28.8578	-0.108498	29.9991	-0.111216	35.6447
		-0.011048	4.31189	-0.0258694	13.8486	-0.0844122	28.1212	-0.108502	29.9337	-0.111296	35.6616
		-0.011	4.66781	-0.0258653	13.9147	-0.0842857	28.2441	-0.10849	29.8657	-0.111352	35.681
		-0.010992	5.0328	-0.0258694	13.9788	-0.0844653	28.5012	-0.108486	29.5374	-0.11144	35.694
		-0.011024	5.38646	-0.0258816	13.7482	-0.0844122	27.7143	-0.108445	29.3491	-0.111528	35.7082
		-0.011064	5.58734	-0.0258245	13.6272	-0.0844041	28.1484	-0.108441	29.2796	-0.111664	35.7315
		-0.01108	5.61067	-0.0257959	13.8578	-0.0845429	27.9039	-0.108424	28.9751	-0.111704	35.7549
		-0.011	5.55365	-0.0258449	14.2675	-0.0843755	27.1884	-0.108412	28.7108	-0.11176	35.7704
		-0.010968	5.6016	-0.0258531	14.5061	-0.0844612	27.964	-0.108416	28.5138	-0.111824	35.7873
		-0.010936	5.83613	-0.025849	14.6819	-0.0845224	27.2782	-0.108445	28.3189	-0.11192	35.8028
		-0.010936	6.25037	-0.025849	14.8272	-0.0843061	27.0536	-0.108445	28.134	-0.112	35.8197
		-0.010952	6.75274	-0.0258041	15.0572	-0.0844694	27.7169	-0.108498	28.0639	-0.112064	35.8352
		-0.011016	7.17504	-0.0258245	15.3849	-0.0844286	27.0628	-0.108506	27.7381	-0.1122	35.8585
		-0.011032	7.49904	-0.0258408	15.4753	-0.0843429	27.4222	-0.10849	27.4772	-0.112256	35.8832
		-0.011048	7.76462	-0.0258449	15.3709	-0.0844898	27.5623	-0.108482	27.4514	-0.112336	35.9013
		-0.011056	7.97683	-0.0258204	15.2962	-0.0843959	27.0872	-0.108478	27.2836	-0.112416	35.9169
		-0.011048	8.00016	-0.0258571	15.39	-0.0844449	27.7188	-0.108437	27.0926	-0.112512	35.9324
		-0.011016	7.86442	-0.025849	15.4626	-0.0845878	27.3105	-0.108445	27.1375	-0.112608	35.9519
		-0.010984	7.80101	-0.0258449	15.6305	-0.0843429	26.8031	-0.108449	27.0239	-0.112696	35.9687
		-0.010944	7.91232	-0.0258571	15.692	-0.0844776	27.6693	-0.108445	26.9849	-0.11276	35.9907
		-0.010928	8.22288	-0.0258449	15.7627	-0.0845224	26.8652	-0.108453	27.2637	-0.112848	36.0076
		-0.010992	8.59954	-0.0258122	15.9425	-0.0843143	26.9425	-0.108478	27.5069	-0.112992	36.027
		-0.011032	8.7731	-0.0258408	16.1486	-0.0844653	27.4546	-0.108473	27.5645	-0.11304	36.0386
		-0.011048	8.68627	-0.025849	16.1764	-0.0843878	27.0152	-0.108478	27.9153	-0.113136	36.0578
		-0.011088	8.45688	-0.0258449	16.2537	-0.0843714	27.4354	-0.108469	27.9464	-0.113312	36.0783
		-0.01108	8.3195	-0.025849	16.3567	-0.0844245	27.4797	-0.108469	27.9081	-0.113736	36.0949
		-0.011032	8.23915	-0.0258653	16.4116	-0.0843633	27.4202	-0.108486	28.1393	-0.11412	36.1038
		-0.011032	8.20286	-0.0258857	16.3707	-0.0844204	27.7559	-0.108469	28.3355	-0.114264	36.1206
		-0.010976	8.17435	-0.0258939	16.3231	-0.0844408	27.3767	-0.108465	28.648	-0.114304	36.1373
		-0.010944	8.23008	-0.0258939	16.3158	-0.0843714	27.5789	-0.108486	29.0054	-0.114352	36.1554
		-0.010912	8.35709	-0.025902	16.2828	-0.0845061	27.7117	-0.108473	29.1693	-0.114432	36.1749
		-0.010984	8.67072	-0.0258653	16.2887	-0.0844367	27.495	-0.108473	29.495	-0.114536	36.1969
		-0.011048	8.93381	-0.0258286	16.2669	-0.0844245	28.0922	-0.10849	29.8756	-0.114608	36.2176
		-0.011064	8.96362	-0.0258041	16.3178	-0.0845388	27.8359	-0.108506	30.1399	-0.11468	36.2397
		-0.011128	8.72256	-0.0258408	16.3594	-0.0844531	27.9257	-0.10851	30.4669	-0.114752	36.2578
		-0.011128	8.32502	-0.0258449	16.3488	-0.0845306	28.2402	-0.108478	30.6083	-0.114848	36.2721
		-0.011088	7.80322	-0.0258612	16.2028	-0.0844327	27.7526	-0.108453	30.8032	-0.115008	36.2785
		-0.011056	7.21522	-0.0258694	16.0957	-0.0844531	27.9429	-0.108461	31.082	-0.115152	36.2941
		-0.010984	6.71909	-0.0258694	16.0144	-0.0844612	27.9251	-0.108445	30.9632	-0.115296	36.3135
		-0.010944	6.27245	-0.025849	15.9583	-0.0843469	27.7896	-0.108461	31.1904	-0.115384	36.3278
		-0.010912	5.91653	-0.0258898	15.8156	-0.0844408	28.3723	-0.108494	31.3873	-0.115464	36.3485
		-0.010928	5.67418	-0.0258816	15.552	-0.0843878	27.9416	-0.10849	31.2492	-0.11556	36.3757
		-0.01104	5.55235	-0.0258571	15.361	-0.0843061	28.3149	-0.108478	31.3067	-0.11572	36.3991
		-0.011096	5.36702	-0.0258816	15.2303	-0.0844367	28.5256	-0.108478	31.4315	-0.115872	36.4146
		-0.011128	5.0508	-0.0258857	15.0803	-0.0843755	28.3109	-0.108461	31.411	-0.11604	36.4237
		-0.011072	4.72853	-0.0258898	14.9124	-0.0843755	28.6486	-0.108482	31.5914	-0.116128	36.4405
		-0.011016	4.46851	-0.0259143	14.9673	-0.0844653	28.3446	-0.108506	31.6436	-0.116224	36.46
		-0.010952	4.242	-0.0259633	14.9428	-0.0843673	28.348	-0.108498	31.4963	-0.11628	36.4755
		-0.01096	4.0463	-0.0259388	14.7736	-0.0845061	28.9274	-0.108502	31.6284	-0.116384	36.495
		-0.010984	3.96595	-0.025898	14.6765	-0.0844204	28.0381	-0.108482	31.4997	-0.116488	36.5066
		-0.010976	3.96984	-0.0258816	14.6474	-0.0843633	28.5092	-0.108457	31.2797	-0.116568	36.5209
		-0.011048	4.0139	-0.0259143	14.5417	-0.0845469	28.5257	-0.108469	31.3821	-0.116688	36.5339
		-0.011056	3.97373	-0.0258735	14.4347	-0.0844204	27.9753	-0.108478	31.318	-0.116856	36.5559
		-0.011088	3.84154	-0.0258816	14.3428	-0.0844163	28.4708	-0.108478	31.1304	-0.117	36.5727
		-0.011048	3.59918	-0.0258694	14.323	-0.0845551	28.0764	-0.108502	31.1204	-0.117072	36.5948
		-0.010984	3.39182	-0.0258612	14.255	-0.0843633	27.7116	-0.108514	30.9195	-0.117184	36.6116
		-0.010952	3.29203	-0.0258612	14.0415	-0.0844898	28.3723	-0.108469	30.4551	-0.117232	36.6233
		-0.010984	3.32832	-0.0258327	13.8989	-0.0844776	27.3727	-0.108473	30.3229	-0.11736	36.6401
		-0.010984	3.41645	-0.0258122	13.9584	-0.0843265	27.4176	-0.108469	29.8737	-0.11744	36.6557
		-0.011016	3.48773	-0.0258653	14.0773	-0.0845061	27.9706	-0.108449	29.4732	-0.117552	36.6751
		-0.011048	3.50198	-0.0258531	14.0073	-0.0844531	26.9875	-0.108465	29.3781	-0.117704	36.6933
		-0.01104	3.51494	-0.0258327	13.7939	-0.0843633	27.5095	-0.108433	29.1369	-0.117856	36.7088
		-0.011032	3.51106	-0.0258367	13.677	-0.0845551	27.5986	-0.108408	28.7952	-0.11796	36.727
		-0.011024	3.48902	-0.0258694	13.7318	-0.0844735	26.4794	-0.108433	28.7245	-0.118032	36.7477
		-0.010992	3.39312	-0.0258735	13.6743	-0.0843959	27.2022	-0.108449	28.4332	-0.118168	36.7645
		-0.011032	3.32573	-0.0258898	13.6347	-0.0846245	27.1758	-0.10842	27.9561	-0.11828	36.784
		-0.010984	3.32832	-0.0258857	13.9499	-0.0844	26.2567	-0.108473	27.6654	-0.1184	36.8021
		-0.01096	3.39701	-0.0259592	14.2412	-0.0844571	27.3052	-0.108494	27.4124	-0.118512	36.8268
		-0.010928	3.52531	-0.0259796	13.9459	-0.0845429	26.9894	-0.108482	27.0589	-0.11864	36.8384
		-0.01092	3.79618	-0.0258857	13.5587	-0.0843633	26.4893	-0.108465	26.7815	-0.118728	36.8436
		-0.01096	4.31294	-0.0258531	13.7865	-0.0844735	27.1216	-0.108465	26.6223	-0.118872	36.863
		-0.01096	5.12765	-0.0258653	14.1744	-0.0845102	26.5614	-0.108469	26.4011	-0.118992	36.8864
		-0.011	6.012	-0.0258204	14.2332	-0.0843061	26.5521	-0.108441	26.2491	-0.119136	36.9071
		-0.011088	6.75283	-0.0258163	14.3667	-0.0844816	26.9426	-0.108416	26.0727	-0.119264	36.9265
		-0.011152	7.15949	-0.025849	14.5827	-0.0844612	25.8987	-0.108424	25.9656	-0.119384	36.9408
		-0.011152	7.2191	-0.0258408	14.7142	-0.0842449	26.186	-0.108437	26.0804	-0.119512	36.9525
		-0.011064	7.09469	-0.0258898	14.8648	-0.0845184	26.9696	-0.108445	26.0884	-0.119672	36.9693
		-0.011032	6.95472	-0.0258939	14.9323	-0.0844408	25.7204	-0.108449	25.8439	-0.11984	36.9849
		-0.010968	6.96509	-0.0258531	15.3056	-0.0843347	26.6869	-0.108486	25.9688	-0.119968	37.003
		-0.01092	7.12838	-0.0259061	15.6472	-0.0845224	26.969	-0.10849	25.9166	-0.120104	37.0237
		-0.01096	7.53384	-0.0259347	15.5547	-0.0843796	26.2774	-0.108465	25.542	-0.120176	37.0458
		-0.010968	8.12952	-0.0258735	15.2746	-0.0843469	26.8673	-0.108457	25.5883	-0.120272	37.0678
		-0.011088	8.59171	-0.0258857	15.3689	-0.0845102	27.0595	-0.108478	25.8413	-0.120384	37.0872
		-0.011104	8.86382	-0.025898	15.394	-0.0843265	26.2667	-0.108445	25.7574	-0.120512	37.1067
		-0.01108	8.92603	-0.0258898	15.4713	-0.0843673	27.4004	-0.108457	26.0289	-0.12064	37.1287
		-0.011024	8.90011	-0.025902	15.5135	-0.084551	26.9517	-0.108486	26.239	-0.120736	37.1391
		-0.011016	8.88845	-0.0258898	15.6041	-0.084302	26.6135	-0.108465	26.2978	-0.120888	37.1469
		-0.010992	9.14765	-0.0258939	15.6967	-0.0844449	27.5926	-0.108453	26.5457	-0.121024	37.1715
		-0.01104	9.52968	-0.0259061	15.7476	-0.0844898	27.0641	-0.108461	26.8046	-0.12116	37.1948
		-0.011112	9.78466	-0.0258939	15.772	-0.0843796	27.115	-0.108453	26.9012	-0.121264	37.2065
		-0.011072	9.73939	-0.0258857	15.6478	-0.0844857	27.6164	-0.108445	27.2414	-0.1214	37.2194
		-0.011024	9.57653	-0.0258653	15.5348	-0.0844163	27.1725	-0.108453	27.2909	-0.12152	37.2441
		-0.010944	9.5507	-0.0258449	15.6815	-0.0843551	27.5728	-0.108449	27.3431	-0.121648	37.2583
		-0.010928	9.76411	-0.0258857	15.9305	-0.0845102	27.7452	-0.108469	27.6589	-0.121792	37.2739
		-0.010944	10.12	-0.025902	15.8017	-0.0843714	27.4076	-0.108478	27.7607	-0.121856	37.2855
		-0.01096	10.3686	-0.0258408	15.6015	-0.0844	28.2797	-0.108433	27.9325	-0.121976	37.2998
		-0.010984	10.3154	-0.025849	15.585	-0.0845102	27.8186	-0.108433	28.4743	-0.122096	37.327
		-0.011048	10.0951	-0.0258327	15.4747	-0.0843796	27.9303	-0.108437	28.6368	-0.122248	37.3426
		-0.011048	9.86621	-0.0257755	15.2619	-0.084498	28.4945	-0.108416	28.8602	-0.122328	37.3607
		-0.010992	9.72672	-0.0257592	15.3294	-0.0844367	27.7063	-0.1084	29.3655	-0.12244	37.3763
		-0.010928	9.71635	-0.0258204	15.5052	-0.0843388	28.0214	-0.108437	29.5083	-0.122552	37.3983
		-0.010912	9.80789	-0.0258122	15.3684	-0.0845224	28.5143	-0.108445	29.6544	-0.12268	37.4138
		-0.010936	10.147	-0.0258041	15.2852	-0.0843755	27.5042	-0.108457	29.9186	-0.122832	37.4294
		-0.011	10.5746	-0.0258245	15.2534	-0.0843265	28.4469	-0.108449	29.7694	-0.122968	37.454
		-0.011096	10.7781	-0.0258735	14.8814	-0.0846082	28.7402	-0.108461	29.7258	-0.123072	37.4696
		-0.011192	10.5384	-0.0258245	14.3482	-0.0843878	27.6475	-0.108478	30.0693	-0.123184	37.4864
		-0.011144	9.94262	-0.0257673	14.3363	-0.0843633	28.6055	-0.108457	29.9603	-0.123288	37.5097
		-0.011072	9.2005	-0.0258204	14.837	-0.0846082	28.7013	-0.108404	30.0164	-0.123368	37.5227
		-0.010992	8.47536	-0.0259102	14.664	-0.0843592	27.8266	-0.108441	30.3962	-0.123472	37.5421
		-0.010984	7.86024	-0.0258204	13.9464	-0.0843633	28.7549	-0.108433	30.3235	-0.123536	37.5525
		-0.010968	7.29686	-0.0257755	13.7561	-0.0845469	28.5349	-0.1084	30.1055	-0.123608	37.5758
		-0.010912	6.87826	-0.0258041	14.0733	-0.084351	27.9575	-0.108429	30.2502	-0.123712	37.5914
		-0.010888	6.72014	-0.0258735	14.1203	-0.0843796	28.7727	-0.108469	30.0415	-0.123872	37.6056
		-0.010928	6.74347	-0.0258857	13.5791	-0.0844939	28.1034	-0.108465	29.7845	-0.124016	37.6224
		-0.010984	6.82642	-0.025849	13.2283	-0.0843388	27.9952	-0.10849	29.7231	-0.124176	37.6429
		-0.011072	6.84067	-0.0257755	13.1537	-0.0844571	28.3361	-0.108498	29.5566	-0.12428	37.6672
		-0.011112	6.80309	-0.0258082	13.2515	-0.0843673	27.5855	-0.108486	29.3128	-0.12436	37.6839
		-0.01104	6.7331	-0.0258449	13.2025	-0.0843429	27.865	-0.108465	29.213	-0.124408	37.7043
		-0.011056	6.57523	-0.0258612	13.2871	-0.0844694	27.974	-0.108437	28.9606	-0.124504	37.7172
		-0.011048	6.2893	-0.0258531	13.2593	-0.0843265	27.1376	-0.108404	28.9077	-0.124656	37.7263
		-0.011	5.88802	-0.0258776	13.0895	-0.0843673	27.8967	-0.108416	28.7874	-0.124752	37.7432
		-0.010944	5.55883	-0.0258531	12.9389	-0.0845143	27.4864	-0.108412	28.4505	-0.124848	37.7664
		-0.010928	5.35666	-0.0258204	12.9415	-0.084351	27.2115	-0.108429	28.2793	-0.12492	37.7794
		-0.010912	5.31518	-0.0258286	13.1272	-0.0844041	27.4302	-0.108445	28.0244	-0.125048	37.7963
		-0.010936	5.38776	-0.0258571	13.2012	-0.0844	27.1329	-0.108461	27.6094	-0.125144	37.8157
		-0.010928	5.46682	-0.0258898	13.2303	-0.0843184	27.3429	-0.108473	27.3973	-0.12524	37.8325
		-0.011	5.51218	-0.0258898	13.151	-0.0844571	27.4248	-0.108494	27.1541	-0.125328	37.8468
		-0.011056	5.5031	-0.025849	13.1913	-0.0843469	26.9346	-0.108461	26.8416	-0.125416	37.8649
		-0.011024	5.44608	-0.0258327	13.299	-0.0844612	27.7036	-0.108482	26.8298	-0.12548	37.8883
		-0.010984	5.32426	-0.0258245	13.3968	-0.084551	27.2378	-0.108494	26.6065	-0.125528	37.9116
		-0.010992	5.09486	-0.0258449	13.4728	-0.0843714	26.922	-0.108457	26.3561	-0.125656	37.9233
		-0.011	4.79846	-0.0258531	13.6499	-0.0844327	27.4717	-0.108445	26.2471	-0.12576	37.9388
		-0.010976	4.64846	-0.0258571	13.7186	-0.0843796	27.0733	-0.108453	26.1777	-0.12588	37.9583
		-0.010928	4.69498	-0.0258531	13.7847	-0.0843184	27.4282	-0.108453	26.0746	-0.125984	37.9751
		-0.01096	4.94722	-0.0258531	13.9399	-0.0844082	27.5022	-0.108433	25.992	-0.126056	37.9971
		-0.011016	5.36184	-0.025849	14.5041	-0.0843837	27.3568	-0.108461	26.0078	-0.126144	38.0127
		-0.011032	5.78304	-0.0259265	14.73	-0.0844408	27.6046	-0.108469	26.097	-0.126224	38.0269
		-0.010984	5.97096	-0.0259347	14.4155	-0.0844367	27.306	-0.108445	25.8643	-0.12628	38.0438
		-0.011008	5.98133	-0.0258245	14.1433	-0.0843469	27.4777	-0.108433	25.7798	-0.12632	38.0632
		-0.011008	5.97226	-0.0258082	14.4519	-0.0844694	27.8391	-0.108429	25.8294	-0.126368	38.0788
		-0.011032	6.09389	-0.0258857	14.9025	-0.0843959	27.4803	-0.10842	25.6622	-0.126456	38.0982
		-0.011	6.40445	-0.0258939	14.7624	-0.0843837	28.2415	-0.108433	25.7989	-0.12652	38.1125
		-0.011024	6.8148	-0.0258286	14.4341	-0.0845878	28.0353	-0.108445	26.1406	-0.126648	38.1306
		-0.010992	7.25021	-0.0258122	14.6119	-0.0843918	27.6211	-0.108469	26.3256	-0.126752	38.1449
		-0.010968	7.67131	-0.0258204	15.2587	-0.0843878	28.8077	-0.108478	26.3983	-0.126832	38.1643
		-0.011008	8.02982	-0.0258694	15.3849	-0.0845796	28.3717	-0.108457	26.66	-0.126928	38.1889
		-0.011048	8.16677	-0.0258245	15.1544	-0.0843143	27.8305	-0.108461	26.9619	-0.127	38.2097
		-0.011072	8.13835	-0.0258082	15.1549	-0.0844	29.2093	-0.108473	27.1503	-0.127016	38.233
		-0.010944	8.14742	-0.0257959	15.3881	-0.0844939	28.4324	-0.108469	27.585	-0.127136	38.2524
		-0.01092	8.40523	-0.0258449	15.6008	-0.0843796	28.5004	-0.108465	28.0731	-0.127224	38.2719
		-0.011016	8.81069	-0.0258735	15.3768	-0.0844694	29.4815	-0.10849	28.4973	-0.127304	38.2861
		-0.01108	9.21504	-0.0258204	15.02	-0.0845673	28.7991	-0.108486	28.6996	-0.12736	38.3004
		-0.01108	9.46906	-0.0257878	15.0234	-0.0844449	28.8202	-0.108494	29.0755	-0.127448	38.3108
		-0.011072	9.71227	-0.0258204	15.4555	-0.084502	28.9134	-0.10849	29.3609	-0.12752	38.3302
		-0.011024	9.94248	-0.0258531	15.4504	-0.0843918	28.5883	-0.108498	29.5956	-0.127568	38.3419
		-0.011032	10.0394	-0.0258041	15.159	-0.0843878	28.548	-0.108482	29.877	-0.12768	38.3652
		-0.010984	9.96293	-0.0257878	15.0804	-0.084302	28.6822	-0.108498	30.0937	-0.127768	38.3743
		-0.010944	9.88646	-0.0258163	15.1055	-0.0843714	28.8447	-0.108478	30.2582	-0.127864	38.3937
		-0.010928	9.96422	-0.0258367	15.013	-0.0843918	29.0204	-0.108445	30.4874	-0.128016	38.4144
		-0.010952	10.2247	-0.025849	14.8807	-0.0843878	28.9789	-0.108445	30.8395	-0.128104	38.4248
		-0.010984	10.6265	-0.0258776	14.8583	-0.0844122	29.4876	-0.108445	30.9498	-0.128112	38.4481
		-0.011024	10.9414	-0.0258571	14.7981	-0.0844857	29.2278	-0.10842	31.1507	-0.128176	38.4637
		-0.011016	11.0321	-0.0258857	15.1865	-0.0843714	29.2285	-0.108449	31.3324	-0.128296	38.4857
		-0.011072	10.9155	-0.0259796	15.2738	-0.0844571	29.4306	-0.108469	31.3715	-0.128384	38.5104
		-0.011056	10.7716	-0.0259796	14.4757	-0.0844367	29.3388	-0.108453	31.1977	-0.12844	38.5311
		-0.011048	10.7392	-0.0258449	13.8955	-0.0844408	29.3024	-0.108453	31.3266	-0.128464	38.5479
		-0.011024	10.8909	-0.0258612	14.471	-0.0844531	29.2265	-0.108478	31.3959	-0.128496	38.5648
		-0.011016	11.1888	-0.0259755	14.7154	-0.0844204	29.1492	-0.108457	31.2724	-0.128576	38.5816
		-0.011032	11.3443	-0.0259388	13.9583	-0.0844776	29.5073	-0.108445	31.4184	-0.128664	38.605
		-0.011056	11.2134	-0.0258327	13.5156	-0.0843592	28.6801	-0.108461	31.513	-0.128768	38.6205
		-0.011016	10.9544	-0.0258204	13.7489	-0.0843061	29.1598	-0.108457	31.318	-0.128848	38.6387
		-0.011	10.7988	-0.0258408	13.9366	-0.0844449	29.175	-0.108478	31.4727	-0.128944	38.6555
		-0.011024	10.712	-0.0258408	13.7933	-0.0843673	29.0052	-0.108478	31.4033	-0.129016	38.6749
		-0.011	10.6135	-0.0258694	13.675	-0.0844	29.173	-0.108478	31.3537	-0.129136	38.6905
		-0.011008	10.3738	-0.0258694	13.5891	-0.0843837	28.9319	-0.108461	31.3068	-0.129224	38.7099
		-0.010968	10.0824	-0.0258694	13.4015	-0.0843918	28.9325	-0.108445	31.2697	-0.12932	38.7203
		-0.010992	9.63442	-0.0258653	13.2369	-0.0844082	28.9259	-0.108433	31.2387	-0.129392	38.732
		-0.010968	9.07114	-0.0258857	13.1741	-0.0844449	28.8704	-0.108441	31.0715	-0.129456	38.7527
		-0.01096	8.53219	-0.0258857	13.0915	-0.0844408	28.7726	-0.108429	30.6718	-0.129512	38.7773
		-0.010968	8.19298	-0.0258694	13.0181	-0.0844531	28.6234	-0.108457	30.5937	-0.129584	38.7994
		-0.011	8.0688	-0.0258857	13.1113	-0.0844531	28.6491	-0.108478	30.2852	-0.129664	38.8175
		-0.011048	8.02747	-0.0259306	13.1794	-0.0845224	28.4807	-0.108453	29.7884	-0.12976	38.8305
		-0.011064	7.75032	-0.0259143	13.184	-0.0844	28.1153	-0.108441	29.6636	-0.129816	38.8538
		-0.011032	7.29427	-0.0258694	13.2619	-0.0844694	28.3908	-0.108449	29.6867	-0.129936	38.868
		-0.011	6.84586	-0.0258816	13.4278	-0.0844327	28.1133	-0.108445	29.4409	-0.130088	38.881
		-0.010984	6.51571	-0.0258816	13.6855	-0.0843551	28.2606	-0.108441	29.2427	-0.130168	38.8992
		-0.010968	6.31013	-0.0258816	13.7106	-0.0844449	28.367	-0.108469	29.1554	-0.130224	38.9251
		-0.010984	6.17054	-0.0258408	13.5607	-0.0843347	27.8642	-0.108502	28.8528	-0.130296	38.9406
		-0.011008	5.958	-0.0258204	13.5361	-0.0843959	28.2282	-0.108494	28.5456	-0.130392	38.9601
		-0.010992	5.64437	-0.0258122	13.8955	-0.0844653	27.7744	-0.108502	28.4207	-0.130472	38.9795
		-0.010992	5.3424	-0.0258694	14.2272	-0.084351	27.8186	-0.108502	28.1637	-0.130616	38.9951
		-0.010984	5.09746	-0.0258694	14.2568	-0.0844694	28.0836	-0.108473	27.8796	-0.130704	39.0132
		-0.010976	4.97434	-0.0258367	14.0388	-0.0844408	27.4632	-0.108478	27.7528	-0.130744	39.0326
		-0.010968	5.00933	-0.0258122	14.2021	-0.0843755	28.0988	-0.108457	27.3787	-0.130856	39.0495
		-0.011032	5.07413	-0.0258367	14.7327	-0.0845061	27.8794	-0.108433	27.2275	-0.130968	39.0637
		-0.011104	5.00414	-0.0258694	14.878	-0.0843469	27.3621	-0.108429	27.3193	-0.131128	39.0832
		-0.011128	4.75061	-0.0258612	14.5702	-0.0843918	27.9685	-0.108449	27.2579	-0.131232	39.1013
		-0.011096	4.41542	-0.0258449	14.6408	-0.0844286	27.8543	-0.108437	27.238	-0.131328	39.1234
		-0.010984	4.12666	-0.0258449	14.9427	-0.0844	27.9553	-0.108473	27.4463	-0.131376	39.135
		-0.01092	3.9504	-0.0258571	15.2526	-0.084449	28.1185	-0.10849	27.2618	-0.131424	39.1558
		-0.010872	3.9491	-0.0259061	15.2586	-0.0844857	28.2415	-0.108486	27.2056	-0.131496	39.1752
		-0.01088	4.12666	-0.0259184	15.2784	-0.084498	28.3161	-0.108465	27.3569	-0.13164	39.1933
		-0.010888	4.52414	-0.025902	15.2922	-0.0844449	28.2566	-0.108478	27.4792	-0.131792	39.2127
		-0.01096	4.99152	-0.0259061	15.2031	-0.0843837	28.3954	-0.108453	27.4197	-0.131904	39.2257
		-0.011064	5.4085	-0.0258857	15.1779	-0.0844857	28.7277	-0.108445	27.6815	-0.13196	39.2463
		-0.011152	5.55365	-0.0258204	15.4646	-0.0843592	28.1245	-0.108429	27.6703	-0.132096	39.263
		-0.011152	5.4409	-0.0258204	15.7401	-0.0843714	28.8512	-0.108441	27.8513	-0.132184	39.2784
		-0.011144	5.04322	-0.0258286	15.8267	-0.0845143	28.4779	-0.108449	27.9299	-0.132288	39.2925
		-0.011096	4.58621	-0.0258327	16.1947	-0.0843673	28.47	-0.10842	27.9537	-0.13236	39.3077
		-0.011088	4.18493	-0.0258857	16.4445	-0.084449	28.978	-0.108424	27.92	-0.13244	39.3245
		-0.01104	3.88301	-0.0259102	16.1485	-0.0844735	28.5499	-0.108445	28.2866	-0.132536	39.3464
		-0.010968	3.67694	-0.0258449	15.7249	-0.0844327	28.91	-0.108461	28.3944	-0.1326	39.371
		-0.010904	3.60955	-0.0258082	16.0824	-0.0846367	29.3599	-0.108465	28.5616	-0.132736	39.3917
		-0.010856	3.7223	-0.025898	16.6942	-0.0844816	28.3927	-0.10851	29.137	-0.132872	39.4086
		-0.010872	4.08893	-0.0259714	16.4616	-0.0844408	29.282	-0.108494	29.5222	-0.132984	39.4358
		-0.010864	4.69109	-0.0259061	15.9523	-0.0846245	29.249	-0.108482	29.612	-0.133112	39.4526
		-0.01096	5.48107	-0.0258612	15.9787	-0.0843714	28.7231	-0.108478	29.9318	-0.133224	39.4747
		-0.011008	6.30086	-0.0258735	16.2483	-0.0843755	29.5383	-0.108441	30.2377	-0.133368	39.4889
		-0.01108	6.93542	-0.0258816	16.2007	-0.0844939	29.056	-0.108433	30.4656	-0.133488	39.5019
		-0.011088	7.26835	-0.0258816	15.941	-0.0843469	28.8876	-0.108457	30.6091	-0.133616	39.5136
		-0.011104	7.29298	-0.0258082	15.6596	-0.0844653	29.4603	-0.108416	30.8799	-0.133712	39.5343
		-0.011016	7.20874	-0.0258	16.0323	-0.0844367	28.6768	-0.108429	31.1012	-0.13384	39.546
		-0.010984	7.11024	-0.0258898	16.3381	-0.0843878	28.9074	-0.108465	31.1205	-0.133992	39.5654
		-0.011008	7.12709	-0.0259429	15.801	-0.0844735	28.8896	-0.108445	31.1476	-0.134104	39.5835
		-0.010992	7.17115	-0.0258204	15.0743	-0.0844204	28.5738	-0.108453	31.4422	-0.1342	39.6004
		-0.01096	7.34093	-0.0258082	15.2652	-0.0844	28.3722	-0.108482	31.2989	-0.13432	39.6185
		-0.01088	7.7269	-0.025902	15.667	-0.0843918	28.2024	-0.108469	31.285	-0.134432	39.638
		-0.010896	8.22926	-0.0259796	15.3572	-0.0843673	28.1509	-0.108469	31.5089	-0.13456	39.6535
		-0.010952	8.64091	-0.0259184	14.8233	-0.0844286	28.0816	-0.108457	31.4791	-0.134712	39.6768
		-0.011072	8.90659	-0.0258898	14.7142	-0.0843061	27.5953	-0.108445	31.3648	-0.134824	39.6937
		-0.011072	9.05045	-0.0258367	14.8332	-0.0843714	28.2276	-0.108469	31.5802	-0.134984	39.7105
		-0.011024	8.98565	-0.0258694	14.8173	-0.0844531	27.7348	-0.108478	31.3708	-0.135056	39.7339
		-0.011008	8.81069	-0.0258612	14.6382	-0.084249	27.6165	-0.108445	31.2043	-0.135168	39.7546
		-0.011016	8.69405	-0.0258163	14.4373	-0.0843673	27.8854	-0.108469	31.0642	-0.135272	39.7728
		-0.010976	8.71867	-0.0258082	14.5681	-0.0843755	27.1019	-0.108486	30.8687	-0.135384	39.7896
		-0.010936	8.8068	-0.025898	14.9058	-0.0842857	27.4203	-0.108465	30.5958	-0.135504	39.809
		-0.010912	9.08544	-0.0259102	14.6672	-0.0843918	27.3615	-0.108441	30.4966	-0.135608	39.8272
		-0.010984	9.42888	-0.0258122	13.9728	-0.084302	26.9552	-0.108449	30.3579	-0.135736	39.8492
		-0.011048	9.54811	-0.0257388	13.9239	-0.0844041	27.596	-0.10842	30.1082	-0.135904	39.8635
		-0.011152	9.22282	-0.0258041	14.6203	-0.0844653	27.1659	-0.108412	29.8631	-0.136	39.8816
		-0.011144	8.51818	-0.025898	14.689	-0.0843469	26.9736	-0.10842	29.6569	-0.136184	39.8985
		-0.011096	7.60238	-0.0258735	14.2232	-0.0844653	27.1857	-0.108437	29.3153	-0.136352	39.9179
		-0.011	6.80597	-0.0257959	14.134	-0.0844327	26.2237	-0.108416	28.8832	-0.136536	39.9348
		-0.010904	6.31526	-0.0258122	14.5463	-0.0843224	26.6823	-0.108441	28.6024	-0.136608	39.949
		-0.01088	6.23904	-0.0258531	14.7385	-0.0844898	26.6968	-0.108429	28.2675	-0.136704	39.962
		-0.01088	6.50294	-0.0258612	14.6401	-0.084351	26.0903	-0.108445	27.8677	-0.136824	39.9788
		-0.01096	6.98328	-0.0258122	14.43	-0.0844776	27.0007	-0.108461	27.505	-0.13696	39.9905
		-0.010992	7.4148	-0.0257837	14.8278	-0.0845306	26.7232	-0.108465	27.2679	-0.137048	40.0047
		-0.010984	7.5755	-0.0258857	15.4475	-0.0843837	26.6135	-0.108457	26.9876	-0.137184	40.0099
		-0.011088	7.48738	-0.0259061	15.4932	-0.0844571	27.0634	-0.108445	26.6718	-0.137272	40.0138
		-0.01116	7.20614	-0.0258694	15.1041	-0.0844041	26.5983	-0.108453	26.5245	-0.13736	40.0138
		-0.011128	6.72566	-0.0258122	15.1682	-0.0843673	26.9663	-0.108441	26.3487	-0.137464	40.019
		-0.011024	6.16627	-0.0258531	15.7113	-0.0844857	27.0416	-0.108449	26.14	-0.137568	40.0151
		-0.010992	5.66251	-0.0258694	15.885	-0.0843878	26.7363	-0.108453	26.0455	-0.137656	40.0203
		-0.010976	5.17008	-0.0258612	15.6082	-0.0844408	27.2352	-0.108445	25.8663	-0.137696	40.0216
		-0.010952	4.79467	-0.0257796	15.4264	-0.0844612	26.8104	-0.108408	25.6774	-0.137816	40.0203
		-0.010952	4.69234	-0.025751	15.6259	-0.0843551	26.9095	-0.108424	25.9192	-0.137896	40.0177
		-0.010976	4.73486	-0.0257959	15.9522	-0.0844612	27.2682	-0.108412	25.8875	-0.137968	40.0177
		-0.011016	4.77346	-0.0258327	15.9608	-0.0844	26.5289	-0.108412	25.8194	-0.138088	40.0099
		-0.011048	4.6896	-0.0258204	15.7019	-0.0843796	27.2074	-0.108457	25.8908	-0.138152	40.0125
		-0.011024	4.47365	-0.0258	15.7786	-0.0845592	27.2965	-0.108461	25.6973	-0.138216	40.0125
		-0.01104	4.18757	-0.0257796	16.0759	-0.0843633	26.55	-0.108433	25.5308	-0.138304	40.0112
		-0.011016	3.94781	-0.025849	16.2602	-0.0843918	27.4479	-0.108461	25.5116	-0.138456	40.0177
		-0.010952	3.73915	-0.0258531	15.885	-0.0845347	27.1816	-0.108445	25.402	-0.138592	40.0281
		-0.010944	3.5603	-0.0257959	15.6986	-0.0843143	26.9775	-0.10842	25.3353	-0.138672	40.0475
		-0.010952	3.3983	-0.0257633	16.0481	-0.0844163	27.6778	-0.108441	25.5903	-0.138712	40.0592
		-0.010984	3.24667	-0.0259061	16.7135	-0.0844163	27.2431	-0.108457	25.4053	-0.138776	40.0786
		-0.010992	3.18965	-0.0259347	16.5568	-0.0843551	27.5271	-0.108416	25.4007	-0.138888	40.098
		-0.011056	3.22464	-0.0258694	16.2113	-0.0844367	27.658	-0.108478	25.6908	-0.139008	40.1149
		-0.011064	3.23246	-0.0257959	16.4082	-0.0843796	27.4426	-0.108461	25.7819	-0.139056	40.1292
		-0.011056	3.0852	-0.0258776	17.0901	-0.0844041	27.8602	-0.108478	25.8809	-0.139088	40.1486
		-0.011072	2.88221	-0.0259102	17.1	-0.0844449	27.6363	-0.108473	26.1294	-0.139192	40.1641
		-0.011016	2.7191	-0.0258653	16.6164	-0.0844082	27.7347	-0.108482	26.471	-0.139288	40.1823
		-0.011008	2.59339	-0.0258122	16.5351	-0.0844367	27.9719	-0.108441	26.6534	-0.139376	40.203
		-0.010976	2.53507	-0.0257959	16.8556	-0.0843918	27.7948	-0.108461	27.1615	-0.13944	40.2147
		-0.010904	2.58043	-0.025849	17.0029	-0.0843469	28.0122	-0.108445	27.3875	-0.13956	40.2315
		-0.01092	2.70614	-0.025902	16.7796	-0.084449	27.8675	-0.108461	27.8261	-0.13968	40.2562
		-0.010968	2.82149	-0.0258531	16.4393	-0.0842735	27.561	-0.108461	27.9622	-0.13968	40.2769
		-0.011	2.97662	-0.0258571	16.4036	-0.0844204	28.1232	-0.108445	28.216	-0.139784	40.295
		-0.010968	3.25219	-0.0259184	16.4749	-0.0844	27.2934	-0.108461	28.5489	-0.139864	40.3067
		-0.010976	3.57715	-0.0259714	16.2959	-0.0843755	27.6145	-0.108441	28.7914	-0.139976	40.3261
		-0.011008	3.71971	-0.0259265	15.6623	-0.0844327	27.7605	-0.108429	28.8132	-0.140048	40.3404
		-0.01104	3.68731	-0.0258571	15.4482	-0.0844327	27.5927	-0.108424	29.1296	-0.140104	40.3585
		-0.011096	3.6251	-0.0258571	15.7581	-0.0844163	27.5629	-0.108465	29.3918	-0.140208	40.3741
		-0.011048	3.60178	-0.0259061	15.9226	-0.0843918	27.4559	-0.108441	29.5048	-0.140312	40.3935
		-0.011032	3.61733	-0.025902	15.4786	-0.0843469	27.4275	-0.108461	29.5809	-0.140392	40.4117
		-0.011056	3.64714	-0.0258367	15.0723	-0.0843878	27.4242	-0.108457	29.7263	-0.140464	40.4389
		-0.011008	3.69898	-0.0258041	15.1562	-0.0843306	27.3792	-0.108478	29.9384	-0.14056	40.4557
		-0.011008	3.79747	-0.0258735	15.6042	-0.0843633	27.5121	-0.108465	29.844	-0.14064	40.4752
		-0.010928	3.97114	-0.0259592	15.1027	-0.0843959	27.4215	-0.108441	29.7753	-0.140768	40.4972
		-0.01088	4.33118	-0.0258286	14.2385	-0.0843673	27.4268	-0.108449	30.0574	-0.140856	40.5102
		-0.010888	4.89835	-0.0257224	14.3937	-0.084449	27.37	-0.108445	30.2299	-0.14092	40.5296
		-0.010968	5.65968	-0.0258245	15.2612	-0.0843673	26.7886	-0.108416	30.0158	-0.140976	40.5504
		-0.01108	6.48994	-0.0259143	14.878	-0.0844163	27.1479	-0.108408	30.0726	-0.141072	40.5698
		-0.011152	7.19318	-0.0258082	14.1189	-0.084498	26.6901	-0.108412	30.0183	-0.141128	40.5828
		-0.011184	7.5768	-0.0257388	14.2319	-0.0843347	26.5401	-0.10842	29.9899	-0.141184	40.6022
		-0.01116	7.64808	-0.0258449	14.8608	-0.0844612	27.0911	-0.108416	29.8637	-0.141224	40.6281
		-0.011104	7.58976	-0.0259388	14.6223	-0.0844367	26.6102	-0.108424	29.976	-0.141312	40.6398
		-0.010984	7.51978	-0.0258571	14.0231	-0.0843714	27.1268	-0.108437	30.2171	-0.141416	40.6527
		-0.01092	7.56125	-0.0257714	13.9967	-0.0844816	27.1116	-0.108441	30.235	-0.141488	40.6722
		-0.010928	7.80072	-0.0258204	14.662	-0.0843592	26.2732	-0.108404	30.1068	-0.141568	40.6968
		-0.010984	8.16571	-0.025898	14.7485	-0.0843714	27.025	-0.10842	30.1624	-0.14164	40.7136
		-0.011	8.43101	-0.025849	14.1592	-0.0845061	26.5315	-0.108433	30.0671	-0.14172	40.7279
		-0.011024	8.48798	-0.0257633	13.9563	-0.0842898	26.328	-0.108424	29.7488	-0.141792	40.7512
		-0.010992	8.42318	-0.0257469	14.4723	-0.0844531	26.9464	-0.108441	29.5466	-0.141864	40.7772
		-0.010992	8.53853	-0.0258571	14.6896	-0.0844653	26.4806	-0.108457	29.2399	-0.141904	40.7901
		-0.01104	8.85475	-0.0258653	14.0851	-0.0843306	26.5375	-0.108457	28.8343	-0.142008	40.8005
		-0.011104	9.12562	-0.0257755	13.805	-0.0844082	26.7786	-0.108453	28.4644	-0.142088	40.8251
		-0.011088	9.10488	-0.0257592	14.3032	-0.0843265	26.1014	-0.108441	28.1558	-0.142144	40.8497
		-0.011048	8.9675	-0.0259469	14.8661	-0.0843551	26.7727	-0.108424	27.8638	-0.142176	40.8677
		-0.011	8.89752	-0.0259755	14.5946	-0.0844204	26.6333	-0.108441	27.6716	-0.14224	40.878
		-0.010968	8.85864	-0.0258735	14.2603	-0.0843347	26.5778	-0.108416	27.4667	-0.142272	40.8859
		-0.011	8.84179	-0.0258	14.471	-0.0844694	27.1565	-0.108433	27.4383	-0.142376	40.91
		-0.010992	8.86253	-0.0258735	14.991	-0.0844816	26.6868	-0.108461	27.2017	-0.142448	40.9266
		-0.011008	9.05952	-0.0258367	15.0783	-0.0842939	26.9663	-0.108437	27.0181	-0.142576	40.9432
		-0.011008	9.24355	-0.0258367	14.9785	-0.0845184	27.4255	-0.108412	27.0816	-0.142688	40.9548
		-0.011032	9.25262	-0.0257959	15.0129	-0.0843714	26.6975	-0.108453	27.1384	-0.142792	40.9729
		-0.011	9.09581	-0.0257959	15.5124	-0.0844082	27.4454	-0.108441	26.822	-0.142856	40.9976
		-0.010992	8.9999	-0.0258531	15.7872	-0.0844694	27.4143	-0.108416	26.7672	-0.142888	41.0261
		-0.011008	8.95714	-0.0259184	15.5665	-0.0844163	27.3812	-0.108453	26.9852	-0.142944	41.0481
		-0.011032	8.90141	-0.0258122	15.2303	-0.0844612	28.0234	-0.108457	26.781	-0.143048	41.0663
		-0.011032	8.8392	-0.0257959	15.5375	-0.0845143	27.4955	-0.108429	26.5405	-0.143104	41.0883
		-0.011128	8.7433	-0.0259061	16.0561	-0.0843265	27.6944	-0.108429	26.6448	-0.143184	41.0961
		-0.011104	8.45587	-0.0259429	16.0819	-0.0845633	28.3623	-0.108424	26.6415	-0.143224	41.1168
		-0.011008	7.91981	-0.0258776	15.5804	-0.0844163	27.2525	-0.108441	26.5496	-0.14332	41.1375
		-0.010928	7.35518	-0.0258531	15.6312	-0.0842776	27.7995	-0.108429	26.4664	-0.143432	41.1596
		-0.010952	6.98842	-0.0259102	16.2582	-0.084502	28.3327	-0.108433	26.7168	-0.143568	41.1712
		-0.010928	6.82771	-0.0259306	16.354	-0.084351	27.2664	-0.108453	26.7855	-0.143648	41.1881
		-0.011024	6.81475	-0.0259184	15.8665	-0.0842653	28.077	-0.108457	26.9157	-0.143696	41.2075
		-0.01108	6.75514	-0.0258204	15.6828	-0.0844531	28.0678	-0.108465	27.174	-0.143808	41.2244
		-0.011096	6.4692	-0.0258041	16.2094	-0.0842857	27.5141	-0.108486	27.3893	-0.143912	41.2386
		-0.011088	6.01867	-0.025902	16.463	-0.084302	28.4437	-0.108482	27.5855	-0.144	41.2542
		-0.011032	5.61067	-0.025951	16.0627	-0.0844327	28.2567	-0.108473	28.1373	-0.144032	41.2723
		-0.010928	5.31907	-0.0258408	15.5697	-0.0842857	28.2104	-0.10849	28.539	-0.144112	41.2892
		-0.01088	5.13763	-0.0257837	15.8148	-0.0844	29.3785	-0.108465	28.6507	-0.144168	41.306
		-0.010936	5.07283	-0.0258653	16.235	-0.0845184	28.6299	-0.108469	29.2394	-0.144216	41.3216
		-0.011008	5.09098	-0.0259143	15.9879	-0.0842857	28.5156	-0.108482	29.5631	-0.14428	41.3449
		-0.011072	5.07672	-0.0258122	15.2843	-0.0845061	29.0792	-0.108482	29.6932	-0.144424	41.3656
		-0.011112	4.91621	-0.0257755	15.2857	-0.084351	27.9858	-0.108478	29.9271	-0.14448	41.3916
		-0.011064	4.66267	-0.0258939	15.84	-0.0842082	28.2784	-0.10849	30.3135	-0.144616	41.4071
		-0.010968	4.47912	-0.0259469	15.6578	-0.0844041	28.9536	-0.108494	30.4424	-0.144768	41.424
		-0.01092	4.45195	-0.0258571	14.7698	-0.0843184	27.9771	-0.108482	30.5938	-0.144912	41.4447
		-0.010952	4.51286	-0.0258041	14.6093	-0.084249	28.8882	-0.108482	30.8858	-0.14504	41.4628
		-0.01104	4.49861	-0.0258408	15.3089	-0.0845592	29.1161	-0.108461	31.0081	-0.145112	41.4823
		-0.011064	4.39363	-0.0259388	15.2368	-0.0843633	28.1047	-0.108461	31.0108	-0.145168	41.5043
		-0.010992	4.33661	-0.025902	14.3065	-0.0843143	28.9305	-0.108457	31.2235	-0.145224	41.5134
		-0.011	4.40789	-0.0257796	14.0151	-0.0846041	29.1201	-0.108445	31.3529	-0.145312	41.5315
		-0.010992	4.50768	-0.0257673	14.6216	-0.0843918	27.882	-0.108465	31.3946	-0.145784	41.551
		-0.010968	4.63166	-0.0258571	14.6758	-0.0843347	28.9305	-0.108482	31.6185	-0.146296	41.5795
		-0.01096	4.91112	-0.0258653	13.9556	-0.0846776	29.0045	-0.108494	31.8531	-0.146576	41.5976
		-0.011016	5.3424	-0.0257796	13.6735	-0.0844408	27.7063	-0.108478	31.6265	-0.146728	41.6106
		-0.011064	5.85427	-0.0257918	13.8176	-0.0843429	28.5969	-0.108441	31.3186	-0.146848	41.6222
		-0.011056	6.33202	-0.0258857	13.961	-0.0846327	28.6854	-0.108416	31.3021	-0.146936	41.6404
		-0.011064	6.76829	-0.0259061	13.8157	-0.0843959	27.4466	-0.108445	31.2915	-0.147016	41.6598
		-0.011088	7.12838	-0.0258816	13.7385	-0.0843388	28.1628	-0.108416	31.0946	-0.147072	41.6793
		-0.011088	7.36166	-0.025898	13.6314	-0.0845306	27.997	-0.108445	31.4574	-0.147152	41.7
		-0.011064	7.4148	-0.025902	13.8078	-0.0844	27.5345	-0.108486	31.6623	-0.147216	41.7168
		-0.011016	7.35907	-0.0259837	13.8692	-0.0844612	27.8516	-0.108482	31.3008	-0.147352	41.7428
		-0.010968	7.33056	-0.025951	13.1978	-0.0844816	27.5226	-0.108478	31.1701	-0.147512	41.7583
		-0.010928	7.41739	-0.0258612	12.8808	-0.0843388	27.5451	-0.108465	31.1165	-0.14768	41.7752
		-0.010944	7.65586	-0.0258082	13.2289	-0.0844857	27.9646	-0.108445	30.644	-0.14776	41.792
		-0.01096	8.02474	-0.0259347	13.6862	-0.0844245	26.893	-0.108453	30.5482	-0.147872	41.8153
		-0.011	8.32622	-0.0259429	13.3493	-0.0842857	27.5418	-0.108469	30.6421	-0.14796	41.8413
		-0.011	8.46725	-0.0258816	13.0136	-0.0845184	27.5735	-0.108478	30.3553	-0.148056	41.8633
		-0.010944	8.55278	-0.0258245	13.0592	-0.0843429	26.7959	-0.108498	30.1452	-0.14816	41.8737
		-0.010928	8.82494	-0.0258653	13.6148	-0.0843429	27.4255	-0.108498	30.1346	-0.148256	41.8918
		-0.01096	9.28368	-0.0259143	13.552	-0.0843592	27.3601	-0.108473	29.8908	-0.148408	41.9061
		-0.011032	9.6876	-0.0258408	12.9719	-0.0843673	27.3799	-0.108441	29.6159	-0.148536	41.9229
		-0.011096	9.99168	-0.0257714	12.929	-0.0843959	27.5609	-0.108441	29.4686	-0.148712	41.9372
		-0.011088	10.0822	-0.0257714	13.521	-0.0844367	27.6098	-0.108429	29.1191	-0.148816	41.9592
		-0.011088	9.97982	-0.0258857	13.8381	-0.0844531	27.6752	-0.108441	28.7056	-0.148936	41.9812
		-0.011024	9.82574	-0.0258776	13.7865	-0.0844531	27.7789	-0.108457	28.4855	-0.149048	41.9942
		-0.010984	9.85685	-0.0258204	13.8288	-0.0843796	27.8622	-0.108502	28.0778	-0.14916	42.0084
		-0.010944	10.1224	-0.0258327	14.1974	-0.0844776	28.2296	-0.10849	27.7243	-0.149272	42.0279
		-0.010992	10.4619	-0.025898	14.6315	-0.0844	27.7076	-0.108494	27.6939	-0.149368	42.0486
		-0.011056	10.6019	-0.0258816	14.683	-0.0843265	28.3545	-0.108486	27.456	-0.149472	42.0603
		-0.011032	10.5228	-0.0258735	14.6659	-0.0846122	28.6028	-0.108441	27.0788	-0.149648	42.0797
		-0.010984	10.5176	-0.0258776	14.8305	-0.0844041	27.5874	-0.108412	27.0683	-0.149776	42.0979
		-0.010936	10.7833	-0.0258939	14.8966	-0.0843633	28.5123	-0.108429	27.0042	-0.149968	42.1225
		-0.011008	11.1216	-0.0258776	14.9145	-0.0844653	28.2606	-0.108416	26.6098	-0.150088	42.1419
		-0.011072	11.2045	-0.025902	14.9561	-0.0843918	28.3002	-0.108449	26.5748	-0.150176	42.1549
		-0.011104	11.0295	-0.0258571	14.7249	-0.0843918	29.1082	-0.10849	26.512	-0.150272	42.1756
		-0.01112	10.7405	-0.0257837	14.7678	-0.0845306	28.7257	-0.108473	26.3614	-0.1504	42.1977
		-0.01104	10.5384	-0.0257959	15.4952	-0.084302	28.5084	-0.108465	26.3316	-0.150512	42.2158
		-0.011008	10.4787	-0.0258898	15.6703	-0.0844816	29.8125	-0.108453	26.3957	-0.150648	42.2391
		-0.010976	10.528	-0.0258816	15.108	-0.0844776	28.7799	-0.108453	26.4737	-0.150768	42.2612
		-0.010936	10.6174	-0.0257714	14.958	-0.0842122	28.5843	-0.108445	26.5061	-0.15092	42.2806
		-0.01096	10.9322	-0.0257592	15.4825	-0.0844	29.9948	-0.108453	26.4875	-0.151048	42.2949
		-0.011024	11.3127	-0.0258367	15.7719	-0.0845469	29.0554	-0.108469	26.666	-0.151208	42.3117
		-0.011072	11.4241	-0.0258367	15.4217	-0.0844163	28.7568	-0.108486	26.6389	-0.151304	42.3234
		-0.011056	11.1796	-0.0257102	15.1225	-0.084551	29.2397	-0.108461	26.4096	-0.15144	42.3454
		-0.011048	10.852	-0.0256816	15.569	-0.0845306	28.3887	-0.108465	26.4618	-0.15164	42.3674
		-0.011032	10.48	-0.0258449	16.1227	-0.0843673	28.5123	-0.108506	26.6309	-0.151784	42.3869
		-0.011016	9.96077	-0.0259429	15.5922	-0.0844898	29.0706	-0.108461	26.4709	-0.151904	42.4089
		-0.011008	9.48432	-0.0258163	14.878	-0.0843673	28.6081	-0.108441	26.7471	-0.152048	42.427
		-0.01104	9.23707	-0.0257347	15.2025	-0.0843429	29.5754	-0.108473	27.2426	-0.152208	42.4412
		-0.011	9.18005	-0.0258449	15.7773	-0.0846	29.7637	-0.108437	27.3906	-0.15228	42.4553
		-0.010952	9.14894	-0.0258898	15.6016	-0.0843714	28.7825	-0.108424	27.6258	-0.152408	42.4759
		-0.01104	8.99083	-0.0258082	15.188	-0.0844	29.6441	-0.108453	28.0884	-0.152512	42.4874
		-0.01108	8.5763	-0.0257837	15.1992	-0.0844776	28.7548	-0.108424	28.1473	-0.152704	42.5028
		-0.01104	7.98581	-0.0258408	15.5362	-0.0842816	28.5659	-0.108396	28.3991	-0.152928	42.5246
		-0.010976	7.47826	-0.025898	15.3782	-0.0843878	29.2728	-0.108441	28.7783	-0.153048	42.5555
		-0.011	7.03507	-0.0258776	14.664	-0.084498	28.7364	-0.108433	28.8656	-0.153144	42.5736
		-0.011032	6.67608	-0.0258082	14.3733	-0.0843878	28.85	-0.108449	29.1047	-0.153232	42.5879
		-0.011064	6.4237	-0.0258327	14.7313	-0.0845143	28.9227	-0.108457	29.4502	-0.153392	42.6047
		-0.01104	6.19997	-0.0259184	14.8364	-0.0844122	28.1199	-0.108494	29.5856	-0.153536	42.6216
		-0.010976	5.99947	-0.0259469	14.4188	-0.0843388	28.6768	-0.108486	29.8286	-0.153672	42.6462
		-0.010984	5.9593	-0.0258449	13.9841	-0.0844898	28.5295	-0.10849	30.1207	-0.15384	42.6682
		-0.01104	5.93338	-0.0258286	14.3072	-0.0843633	28.3564	-0.108473	30.2158	-0.15396	42.6812
		-0.01112	5.7312	-0.025898	14.7148	-0.084498	29.0806	-0.108473	30.4345	-0.154112	42.7071
		-0.011072	5.40202	-0.0259592	14.4175	-0.084502	28.5686	-0.108461	30.6031	-0.154248	42.7265
		-0.010984	5.15448	-0.025849	13.741	-0.0844286	28.5811	-0.108445	30.6546	-0.154376	42.7356
		-0.01096	5.10394	-0.0258082	13.7588	-0.0845837	28.9709	-0.108457	30.7385	-0.154504	42.7486
		-0.010968	5.18299	-0.0258531	14.148	-0.0844694	28.1504	-0.108445	30.755	-0.154648	42.7615
		-0.011024	5.30222	-0.0259143	13.9908	-0.0844408	28.8083	-0.108486	30.8118	-0.154784	42.7745
		-0.011008	5.42794	-0.0258612	13.2997	-0.0846653	28.6346	-0.108478	30.7074	-0.154904	42.7952
		-0.011	5.70528	-0.0258204	13.1716	-0.0844163	27.8365	-0.108473	30.7035	-0.155008	42.8224
		-0.011048	6.1248	-0.0258122	13.2648	-0.084449	28.8076	-0.108469	30.4966	-0.155168	42.8406
		-0.011088	6.38227	-0.0258694	13.3295	-0.0846367	28.2646	-0.108478	30.3394	-0.155248	42.8574
		-0.01112	6.37594	-0.0259061	13.0308	-0.0844041	27.8906	-0.108478	30.0791	-0.155384	42.8743
		-0.011104	6.25459	-0.025849	12.8002	-0.084502	28.5103	-0.108486	30.0131	-0.155496	42.8989
		-0.01104	6.11741	-0.0258408	12.7751	-0.0845143	27.8827	-0.108506	29.8022	-0.155616	42.9222
		-0.011048	5.81155	-0.0258653	13.2461	-0.0843714	27.9871	-0.108482	29.5565	-0.155736	42.9443
		-0.011032	5.40331	-0.025902	13.2435	-0.0844082	28.3022	-0.108486	29.3701	-0.155896	42.9637
		-0.010984	5.06246	-0.0258735	13.0136	-0.0843265	27.8015	-0.108478	29.0088	-0.155992	42.9844
		-0.010904	4.9549	-0.0258449	12.9812	-0.0843592	28.2897	-0.108449	28.4663	-0.156144	43.0039
		-0.010872	5.04302	-0.0258041	13.194	-0.0844857	27.9957	-0.108445	28.1935	-0.156248	43.0181
		-0.010944	5.33722	-0.0258735	13.4484	-0.0843633	27.5974	-0.108482	28.0706	-0.156312	43.0376
		-0.010984	5.7959	-0.0258694	13.3994	-0.0844694	28.036	-0.108461	27.61	-0.156464	43.0648
		-0.01096	6.34882	-0.0258367	13.3538	-0.0845184	27.3403	-0.108429	27.3022	-0.156632	43.0868
		-0.01092	6.86026	-0.0258122	13.6484	-0.0843673	27.7037	-0.108453	27.067	-0.156792	43.105
		-0.010984	7.33834	-0.0258653	14.4121	-0.0844735	28.0116	-0.108469	26.8694	-0.156936	43.1218
		-0.011016	7.76842	-0.0259143	14.5204	-0.0844	27.6878	-0.108453	26.5219	-0.157056	43.1374
		-0.011056	8.12563	-0.025902	14.1689	-0.0844531	28.0149	-0.108445	26.3171	-0.15712	43.1581
		-0.011064	8.47248	-0.0258286	14.1399	-0.0844939	27.894	-0.108482	26.1029	-0.157208	43.1801
		-0.011064	8.63962	-0.025849	14.7504	-0.0843755	27.7963	-0.10849	25.8689	-0.157288	43.1918
		-0.011016	8.65776	-0.0259306	15.0841	-0.0845061	28.3149	-0.108461	25.5174	-0.157376	43.1996
		-0.010992	8.68886	-0.0259306	14.8853	-0.0844367	27.5604	-0.108469	25.3839	-0.157488	43.2177
		-0.011008	8.95454	-0.0258612	14.6819	-0.0843061	28.2032	-0.108502	25.22	-0.157664	43.2423
		-0.011056	9.24226	-0.0258612	15.0637	-0.0844531	28.4919	-0.108482	25.203	-0.157816	43.2553
		-0.011056	9.37704	-0.0259061	15.5792	-0.0843714	28.0459	-0.108469	25.4448	-0.157944	43.2708
		-0.011008	9.42629	-0.0259592	15.5765	-0.0843429	28.9034	-0.108486	25.3762	-0.15804	43.289
		-0.010992	9.66298	-0.0258898	15.1246	-0.0845755	28.8684	-0.108445	25.2429	-0.158144	43.3123
		-0.01104	10.0215	-0.0258367	15.1992	-0.0843673	28.0657	-0.108416	25.4318	-0.158272	43.3305
		-0.011088	10.182	-0.0258531	15.8685	-0.0844571	29.2939	-0.108433	25.6089	-0.158392	43.3499
		-0.011072	10.1133	-0.0259306	16.0276	-0.084551	28.4899	-0.108433	25.404	-0.158512	43.3629
		-0.010968	9.94478	-0.0258857	15.4793	-0.0843061	28.1833	-0.108416	25.334	-0.1586	43.3849
		-0.01096	9.86314	-0.0258	15.4211	-0.0844122	29.3395	-0.108449	25.5645	-0.158744	43.4004
		-0.010984	9.86573	-0.0258204	16.1624	-0.0845347	28.8162	-0.108494	25.5857	-0.158872	43.4212
		-0.010992	9.99144	-0.0259224	16.4484	-0.0843224	28.5427	-0.108482	25.3966	-0.158984	43.4445
		-0.011032	10.296	-0.0259143	16.0164	-0.0845224	29.3804	-0.108486	25.4839	-0.159096	43.4614
		-0.01108	10.5811	-0.0258327	15.7507	-0.0844857	28.3723	-0.108486	25.8327	-0.159144	43.486
		-0.011096	10.6122	-0.0257959	16.2158	-0.0843673	28.6584	-0.108457	25.8314	-0.159232	43.5041
		-0.011024	10.4554	-0.0258571	16.5607	-0.0845184	29.3355	-0.108457	26.1089	-0.159312	43.5184
		-0.010992	10.3465	-0.025898	16.3038	-0.0844041	28.47	-0.108449	26.5186	-0.1594	43.5352
		-0.010984	10.2688	-0.0258286	15.7785	-0.0843265	29.1221	-0.108437	26.7201	-0.159528	43.5573
		-0.01104	10.2053	-0.0258122	15.7858	-0.0845673	29.2589	-0.108449	26.9685	-0.159672	43.5806
		-0.011024	10.1172	-0.0258694	15.9952	-0.0843429	28.3946	-0.108445	27.3028	-0.159816	43.5948
		-0.011	10.0588	-0.0259184	16.0388	-0.0843429	29.0718	-0.108449	27.5393	-0.159912	43.6104
		-0.011024	10.0446	-0.0259143	16.0091	-0.0845347	28.6622	-0.108441	27.7244	-0.159992	43.635
		-0.011056	10.0005	-0.025898	15.9477	-0.0843143	28.2466	-0.108453	28.1758	-0.160096	43.6532
		-0.011008	9.90202	-0.025902	15.984	-0.0843878	29.2812	-0.108433	28.4268	-0.160176	43.6635
		-0.011	9.78581	-0.0259306	16.0527	-0.0844612	28.5492	-0.108437	28.7307	-0.16024	43.6856
		-0.011	9.57763	-0.0259755	15.8103	-0.0842857	28.6253	-0.108429	29.0438	-0.160376	43.705
		-0.011032	9.15802	-0.025951	15.3042	-0.0844082	28.8624	-0.108445	29.3075	-0.160512	43.7244
		-0.010976	8.60477	-0.0259061	15.2045	-0.0843714	28.4945	-0.108445	29.3708	-0.160632	43.7413
		-0.010976	8.05834	-0.0258857	15.6372	-0.0844245	28.3445	-0.108457	29.6219	-0.16072	43.7607
		-0.010944	7.6415	-0.0259592	15.6664	-0.0844776	28.1179	-0.108445	29.7547	-0.16084	43.7776
		-0.010976	7.4148	-0.0259306	15.0176	-0.0843469	27.4705	-0.108457	29.797	-0.160952	43.797
		-0.011024	7.19837	-0.0258204	14.5716	-0.0844571	28.2547	-0.108433	29.9542	-0.16108	43.8113
		-0.011032	6.85238	-0.0257959	14.8629	-0.0844857	27.2221	-0.108445	30.2278	-0.161192	43.8372
		-0.011	6.43685	-0.0258816	15.182	-0.0842204	27.2783	-0.108469	30.2297	-0.161272	43.8579
		-0.010976	6.0576	-0.0259143	14.9785	-0.0844571	27.6892	-0.10849	30.2396	-0.161368	43.8748
		-0.010968	5.77267	-0.0258694	14.771	-0.0844776	26.9241	-0.108482	30.4081	-0.161448	43.8929
		-0.010904	5.62363	-0.0258531	14.8332	-0.0843347	27.1818	-0.108518	30.6003	-0.161568	43.9163
		-0.010928	5.60678	-0.0259102	14.9726	-0.0844694	27.3	-0.108514	30.6149	-0.16172	43.9279
		-0.011008	5.64696	-0.0259429	14.8437	-0.0843673	26.6928	-0.108514	30.7834	-0.161784	43.9409
		-0.011112	5.53939	-0.0259306	14.1936	-0.0844449	27.36	-0.108514	30.8977	-0.161912	43.9642
		-0.011104	5.26205	-0.0258735	13.8823	-0.0845265	27.033	-0.10851	30.9242	-0.161984	43.9836
		-0.011056	4.93171	-0.0258163	13.9755	-0.0843592	26.7998	-0.10849	30.7756	-0.162088	43.9966
		-0.010984	4.69114	-0.0258245	14.2252	-0.0844449	27.3251	-0.108469	30.6943	-0.162176	44.0199
		-0.010944	4.49198	-0.025849	14.167	-0.0844408	26.6809	-0.108465	30.7359	-0.162264	44.0406
		-0.01092	4.32365	-0.0258204	14.0276	-0.0842571	27.0172	-0.108457	30.5047	-0.162312	44.0691
		-0.010936	4.24848	-0.0257878	14.1882	-0.0844	27.177	-0.108449	30.2225	-0.162368	44.0884
		-0.010992	4.27181	-0.0258816	14.8482	-0.0842857	26.3076	-0.108445	30.0726	-0.162552	44.1077
		-0.011072	4.27829	-0.0259224	14.8905	-0.0843061	27.1665	-0.108449	29.8289	-0.162744	44.1178
		-0.011088	4.11629	-0.0258531	14.3428	-0.0845224	27.1406	-0.108457	29.4232	-0.162864	44.1344
		-0.01104	3.89078	-0.0257388	14.2589	-0.0843143	26.3597	-0.108465	29.2123	-0.162952	44.1588
		-0.010968	3.74174	-0.0257102	14.7531	-0.0844245	27.3996	-0.108478	29.0644	-0.163072	44.1794
		-0.010984	3.72101	-0.0257755	15.0287	-0.084551	26.9213	-0.108498	28.7485	-0.1632	44.1989
		-0.011008	3.77414	-0.0258367	15.0485	-0.0843673	26.7528	-0.108502	28.5489	-0.163328	44.217
		-0.011024	3.84672	-0.0258735	15.0604	-0.0844449	27.2688	-0.108482	28.4286	-0.163416	44.2287
		-0.011072	3.91022	-0.0258776	15.0519	-0.0844449	26.768	-0.108457	28.2332	-0.163504	44.2481
		-0.011096	3.94003	-0.0258857	14.9191	-0.0843061	27.0481	-0.108461	27.9154	-0.163656	44.2676
		-0.011064	3.9193	-0.0258653	14.8827	-0.0844286	27.2311	-0.108469	27.8169	-0.163808	44.2883
		-0.011	3.81173	-0.0258163	15.0948	-0.0842898	26.6676	-0.108486	27.5335	-0.163968	44.3052
		-0.011008	3.60696	-0.0257837	15.3862	-0.084302	27.3289	-0.108498	27.2737	-0.164032	44.3233
		-0.010992	3.42422	-0.0258082	15.5442	-0.0843633	27.2213	-0.108506	27.1276	-0.164152	44.3414
		-0.010904	3.42682	-0.0258531	15.9069	-0.0843143	27.2787	-0.108482	27.0543	-0.164256	44.357
		-0.010896	3.5603	-0.0258694	16.0647	-0.0844122	27.8661	-0.108482	27.0067	-0.164416	44.3751
		-0.010944	3.84931	-0.0258816	15.5401	-0.0844041	27.3977	-0.108469	26.899	-0.164584	44.3946
		-0.011	4.2419	-0.0258	15.3491	-0.0843306	27.8093	-0.108465	26.8093	-0.164736	44.4192
		-0.011056	4.6717	-0.0258163	16.3137	-0.0845224	27.9626	-0.108482	26.7268	-0.1648	44.4412
		-0.01104	5.04965	-0.0259918	16.5991	-0.0843306	27.4552	-0.108478	26.7228	-0.164904	44.4581
		-0.011	5.42405	-0.0259306	15.6722	-0.0843224	28.1298	-0.108445	26.555	-0.165024	44.4775
		-0.010992	5.70787	-0.0257265	15.5876	-0.0845143	27.8708	-0.108461	26.7446	-0.165208	44.4983
		-0.010992	5.96443	-0.0257878	16.7928	-0.084302	27.4533	-0.108469	26.8284	-0.165392	44.5151
		-0.01096	6.28536	-0.0259306	16.9401	-0.0843837	28.4602	-0.108473	27.0306	-0.165568	44.532
		-0.011064	6.71515	-0.0258245	16.1757	-0.0844531	27.6535	-0.108453	27.1456	-0.16572	44.5566
		-0.011096	7.05451	-0.0257714	16.2484	-0.0842327	27.713	-0.108469	27.4614	-0.16584	44.5799
		-0.011096	7.1867	-0.0258531	16.9699	-0.0844082	28.7781	-0.108482	27.6232	-0.165888	44.5903
		-0.011072	7.20614	-0.0259469	16.9685	-0.0843796	27.9205	-0.108494	28.0574	-0.165968	44.6032
		-0.01108	7.33056	-0.0258898	16.2351	-0.084298	28.2304	-0.108437	28.2073	-0.166112	44.6214
		-0.011056	7.62605	-0.0258327	16.2233	-0.0844571	28.7622	-0.108473	28.5595	-0.166272	44.6447
		-0.011048	7.95874	-0.0258694	17.135	-0.0843878	27.8557	-0.108482	28.944	-0.166464	44.6667
		-0.01104	8.24467	-0.0260245	17.2321	-0.0842898	28.3472	-0.108453	29.1984	-0.166656	44.6849
		-0.011104	8.36098	-0.0259551	16.3388	-0.0845551	28.6881	-0.1084	29.3629	-0.166824	44.7082
		-0.011072	8.31821	-0.0258367	16.1221	-0.0843469	27.7988	-0.108449	29.8506	-0.16696	44.7315
		-0.011056	8.24174	-0.0258	16.4518	-0.0843918	28.6709	-0.108465	29.9469	-0.167072	44.7406
		-0.011016	8.22101	-0.0258163	16.4783	-0.0845347	28.4212	-0.108473	30.0487	-0.1672	44.7588
		-0.010968	8.2236	-0.0257633	16.6039	-0.0844	28.0321	-0.108498	30.422	-0.167328	44.7782
		-0.010968	8.26766	-0.0258531	17.1847	-0.0844898	28.3869	-0.108543	30.5713	-0.167528	44.8015
		-0.011016	8.49058	-0.0259224	17.2276	-0.0844857	27.7857	-0.108518	30.7886	-0.167688	44.8261
		-0.011088	8.83402	-0.0259755	16.5794	-0.0844041	27.8293	-0.108498	31.0338	-0.167832	44.8417
		-0.011152	9.04267	-0.0258694	15.8454	-0.0845388	28.0684	-0.108482	31.2453	-0.167968	44.8585
		-0.011144	8.99861	-0.0258245	15.7092	-0.0844245	27.1977	-0.108478	31.4006	-0.168096	44.8728
		-0.011064	8.78736	-0.0258408	16.0401	-0.0843592	27.8386	-0.108457	31.5327	-0.168224	44.8909
		-0.01104	8.6124	-0.0259469	16.3533	-0.0845469	27.7962	-0.108465	31.608	-0.168384	44.9078
		-0.011024	8.5476	-0.0259388	16.1757	-0.0843429	26.9737	-0.108469	31.6167	-0.16856	44.9259
		-0.011	8.59944	-0.0259306	15.92	-0.0844163	27.8372	-0.108469	31.4211	-0.168728	44.9402
		-0.010984	8.68627	-0.0259143	15.8129	-0.0845143	27.3311	-0.108461	31.4072	-0.16888	44.9635
		-0.01104	9.0024	-0.0259143	15.3828	-0.084302	27.0556	-0.108445	31.4158	-0.169008	44.9856
		-0.011248	9.69139	-0.0258204	14.8761	-0.0844857	27.6694	-0.108441	31.4542	-0.16916	44.9998
		-0.011608	10.5035	-0.0257469	15.1027	-0.0844735	27.047	-0.10842	31.6014	-0.169328	45.0167
		-0.01192	11.1045	-0.0258449	15.5566	-0.0843429	27.3145	-0.108429	31.9066	-0.169488	45.0361
		-0.012112	11.5317	-0.0258653	15.4305	-0.084498	27.6891	-0.108429	31.8649	-0.16964	45.0529
		-0.012344	11.8928	-0.0258653	15.2574	-0.0844204	26.9459	-0.108445	31.6899	-0.169808	45.0698
		-0.0126	12.1662	-0.0258571	15.2098	-0.0843918	27.44	-0.108437	31.4698	-0.169936	45.0892
		-0.012952	12.3503	-0.0258776	15.3875	-0.0844816	27.1797	-0.108478	31.5128	-0.170072	45.1061
		-0.013144	12.4358	-0.025902	15.3789	-0.0843592	26.7272	-0.108461	31.0874	-0.170232	45.1255
		-0.013488	12.5343	-0.0259306	15.1026	-0.0844367	27.0998	-0.108478	30.8019	-0.170368	45.1437
		-0.01376	12.6574	-0.0258408	14.7188	-0.0844653	26.6333	-0.108486	30.9532	-0.170552	45.1709
		-0.01396	12.7572	-0.0257796	14.9448	-0.0843551	26.9041	-0.108494	30.8825	-0.170704	45.1916
		-0.014208	12.8997	-0.0259102	15.2678	-0.0845306	27.1816	-0.108486	30.5481	-0.170848	45.2098
		-0.014576	13.0086	-0.0259265	15.1674	-0.0844041	26.4351	-0.108469	30.3645	-0.171024	45.2266
		-0.014864	13.0565	-0.025902	14.7135	-0.0843469	27.2035	-0.108457	30.426	-0.171176	45.2383
		-0.015088	13.0811	-0.0258612	14.5654	-0.0845429	27.3396	-0.108461	30.0633	-0.171328	45.2551
		-0.01532	13.1843	-0.025902	15.0596	-0.0843061	26.5533	-0.108437	29.6484	-0.171504	45.2759
		-0.015584	13.3212	-0.0259714	15.1039	-0.0843673	27.4961	-0.10842	29.4298	-0.171672	45.2914
		-0.01584	13.4183	-0.0259918	14.7022	-0.084498	27.138	-0.108469	29.1185	-0.171824	45.3121
		-0.016088	13.461	-0.025902	14.4373	-0.0843878	27.1479	-0.108461	28.5894	-0.171912	45.3303
		-0.016344	13.474	-0.0258776	14.7393	-0.0844735	27.6151	-0.108453	28.2425	-0.17204	45.3445
		-0.016576	13.6049	-0.0259143	14.9586	-0.0844612	27.2583	-0.108457	27.9545	-0.172248	45.3614
		-0.01684	13.7461	-0.0258857	14.8199	-0.0844082	27.627	-0.108453	27.5943	-0.172512	45.3821
		-0.017072	13.4588	-0.0258245	14.4552	-0.084502	27.7486	-0.108429	27.3815	-0.172744	45.4042
		-0.017152	12.4564	-0.0257429	14.4876	-0.0843959	27.5141	-0.108445	27.1634	-0.172848	45.4262
		-0.017064	10.9814	-0.0257469	15.0492	-0.0844408	28.0334	-0.108437	26.9335	-0.172968	45.443
		-0.017008	9.79128	-0.0258571	15.1576	-0.0844694	27.9918	-0.108453	26.8462	-0.17312	45.4573
		-0.016952	9.11525	-0.0258776	14.7288	-0.0844367	28.1087	-0.108457	26.6593	-0.173304	45.4741
		-0.016936	8.9377	-0.0257796	14.6555	-0.0844694	28.2627	-0.108453	26.5887	-0.17356	45.4962
		-0.01692	9.13723	-0.0258286	15.622	-0.0844408	28.2118	-0.108457	26.736	-0.173752	45.5182
		-0.016976	9.68626	-0.0259796	16.0409	-0.0844408	28.4853	-0.108461	26.6118	-0.173912	45.5364
		-0.017056	10.2962	-0.0259755	15.7139	-0.084498	28.2844	-0.108424	26.3772	-0.174056	45.5519
		-0.017088	10.5189	-0.0258571	15.4476	-0.0844367	28.5646	-0.108429	26.5391	-0.174256	45.5739
		-0.01704	10.401	-0.0258122	16.0441	-0.0845184	28.8308	-0.10842	26.3666	-0.174432	45.5934
		-0.01696	10.1768	-0.0259224	16.3705	-0.0844571	28.4093	-0.108412	25.9979	-0.17472	45.6231
		-0.016984	10.112	-0.0259592	16.0897	-0.0844531	28.9424	-0.108433	26.0606	-0.175032	45.6644
		-0.016992	10.1262	-0.0258408	15.6225	-0.0845633	28.8532	-0.108465	26.2568	-0.175384	45.7132
		-0.017008	10.2286	-0.0257714	15.8379	-0.084449	28.5711	-0.108461	26.0408	-0.175752	45.7596
		-0.016944	10.6187	-0.0258816	16.3744	-0.0845347	29.313	-0.108469	26.0778	-0.176032	45.8034
		-0.016896	11.2844	-0.0259224	16.383	-0.0845306	28.6166	-0.108482	26.2364	-0.176232	45.8242
		-0.016896	12.0291	-0.0258816	16.1769	-0.0843878	28.799	-0.108449	26.0197	-0.176376	45.8423
		-0.016968	12.6211	-0.0258449	16.1994	-0.0845551	29.3823	-0.108424	25.9814	-0.17652	45.8579
		-0.017048	13.0626	-0.0258735	16.6493	-0.0844367	28.3247	-0.108441	26.2496	-0.176624	45.8721
		-0.017096	13.3667	-0.0258776	16.7676	-0.0843102	29.0018	-0.108412	26.288	-0.176792	45.8993
		-0.017104	13.509	-0.0259061	16.5568	-0.0845878	29.2681	-0.108392	26.4584	-0.177056	45.9486
		-0.01712	13.3409	-0.0258122	16.2212	-0.0844082	28.1727	-0.108416	26.7907	-0.177472	46.0108
		-0.017064	13.0446	-0.0257633	16.3607	-0.084351	29.0593	-0.108408	26.7253	-0.17788	46.0769
		-0.017008	12.8544	-0.0258286	16.7247	-0.0846082	28.9986	-0.108412	26.7644	-0.178288	46.1365
		-0.016992	12.9526	-0.0258694	16.6752	-0.0843714	28.034	-0.108433	26.9262	-0.178536	46.1702
		-0.016968	13.3824	-0.0258204	16.2761	-0.0843469	29.0414	-0.108441	27.1092	-0.178664	46.1935
		-0.017056	13.7734	-0.0257755	16.2279	-0.0845184	28.577	-0.108457	27.4211	-0.178784	46.213
		-0.017088	13.7241	-0.0257918	16.6032	-0.0843633	28.1311	-0.108461	27.6827	-0.178864	46.2298
		-0.017064	13.4545	-0.0258327	16.578	-0.0844694	29.0098	-0.108461	27.9688	-0.178944	46.2454
		-0.016952	13.4027	-0.0258	16.3202	-0.0845878	28.3538	-0.108469	28.3356	-0.179056	46.2622
		-0.016992	13.715	-0.0257551	16.0632	-0.0844245	28.184	-0.108478	28.6097	-0.17916	46.2765
		-0.017072	13.8589	-0.0257592	15.9885	-0.0845796	29.0237	-0.10849	28.8654	-0.179224	46.3024
		-0.017128	13.5907	-0.0257714	15.8927	-0.0845388	27.9059	-0.10851	29.2545	-0.179328	46.3231
		-0.017048	13.298	-0.0258082	15.8406	-0.0843224	27.9507	-0.108506	29.526	-0.179448	46.3426
		-0.016952	13.307	-0.0258367	15.4382	-0.0845224	28.4317	-0.108494	29.6774	-0.179592	46.3594
		-0.016976	13.6529	-0.0258204	15.1893	-0.0843592	27.3866	-0.10849	29.867	-0.179712	46.375
		-0.017064	13.9107	-0.0257714	15.3247	-0.0843102	27.8742	-0.108478	29.8043	-0.179808	46.3931
		-0.017072	13.7643	-0.0258449	15.5718	-0.0844367	27.9013	-0.108478	29.5948	-0.17988	46.4112
		-0.01704	13.43	-0.0259102	15.1041	-0.0843714	27.567	-0.108486	29.5314	-0.17996	46.4242
		-0.017024	13.1933	-0.0257918	14.4844	-0.0844122	28.0771	-0.108506	29.6893	-0.180064	46.4372
		-0.017032	13.0292	-0.0257102	14.5781	-0.0845429	27.6886	-0.108486	29.5519	-0.180176	46.4527
		-0.016968	12.9399	-0.0258163	15.1264	-0.0843796	27.6001	-0.108478	29.7051	-0.180248	46.4722
		-0.016936	12.9283	-0.0258939	14.8952	-0.0845224	28.044	-0.108469	29.9483	-0.180408	46.4942
		-0.01696	12.9425	-0.0258163	14.2404	-0.0844367	27.5063	-0.108441	30.0289	-0.180552	46.5175
		-0.017024	12.8531	-0.0257959	14.1697	-0.0843878	27.8683	-0.108416	29.9257	-0.180712	46.537
		-0.017016	12.6833	-0.0258612	14.6196	-0.0844612	27.7797	-0.108449	30.0208	-0.1808	46.5616
		-0.017008	12.5097	-0.0259633	14.6249	-0.0843837	27.3444	-0.108445	29.8544	-0.180912	46.5745
		-0.017016	12.3179	-0.0259224	13.9821	-0.0844286	27.7943	-0.108449	29.828	-0.180976	46.5849
		-0.017032	12.1079	-0.0258612	13.6637	-0.0844735	27.2479	-0.108457	29.7282	-0.181088	46.6095
		-0.017048	11.9459	-0.0258245	13.9293	-0.0842898	27.2459	-0.108449	29.4812	-0.181184	46.6264
		-0.016992	11.8461	-0.0259224	14.1466	-0.0844612	27.9594	-0.108408	29.1039	-0.181344	46.6497
		-0.017	11.7904	-0.0259633	13.6512	-0.0843878	27.5518	-0.108424	29.2089	-0.181496	46.6692
		-0.017032	11.7502	-0.0258939	13.2567	-0.0843959	27.9211	-0.108437	28.9638	-0.181608	46.6964
		-0.017072	11.6932	-0.0258122	13.4258	-0.0843796	27.9759	-0.108441	28.5535	-0.181672	46.7119
		-0.017072	11.5794	-0.0259102	13.9604	-0.0844286	28.0744	-0.108449	28.364	-0.181768	46.734
		-0.017048	11.3868	-0.025951	13.9412	-0.0844	28.0487	-0.108478	28.2061	-0.181872	46.7482
		-0.01704	11.1902	-0.0258653	13.7654	-0.0844122	28.1656	-0.108482	27.6431	-0.181952	46.7741
		-0.017064	10.9038	-0.0258571	13.7925	-0.0843551	28.6406	-0.108453	27.1668	-0.18208	46.791
		-0.01704	10.3908	-0.0258327	14.0793	-0.0845878	28.7483	-0.108465	27.0048	-0.182176	46.7988
		-0.016968	9.73939	-0.0258612	14.1612	-0.0843837	28.2553	-0.108498	26.6454	-0.182304	46.8143
		-0.016928	9.28368	-0.0258449	13.8005	-0.0844041	29.4009	-0.108482	26.2509	-0.182464	46.835
		-0.016944	9.1295	-0.0257633	13.4807	-0.0846122	29.0065	-0.108494	26.2047	-0.182616	46.8558
		-0.016984	9.12691	-0.0257102	13.7284	-0.084351	28.3868	-0.10849	26.0863	-0.182704	46.8674
		-0.017016	9.04267	-0.0258367	14.4281	-0.0843796	29.6975	-0.108457	25.7019	-0.182792	46.8934
		-0.017032	8.7096	-0.0258776	14.4472	-0.0845673	29.1505	-0.108441	25.6417	-0.18292	46.9258
		-0.016976	8.33914	-0.0258694	14.2014	-0.0843551	28.5328	-0.108453	25.7138	-0.183032	46.9465
		-0.016928	8.20565	-0.0258449	14.2913	-0.0843347	29.7537	-0.108433	25.3769	-0.183128	46.9633
		-0.016936	8.34024	-0.0258612	14.7558	-0.0846408	29.7193	-0.108441	25.2819	-0.183272	46.9789
		-0.016968	8.66554	-0.025898	14.8185	-0.0843959	28.4886	-0.108469	25.4053	-0.183392	46.9906
		-0.017032	9.15917	-0.025902	14.6996	-0.0844041	29.7743	-0.108441	25.2013	-0.18356	47.0087
		-0.017048	9.63173	-0.0258367	14.6263	-0.0846204	29.4221	-0.108445	24.9582	-0.183632	47.0307
		-0.017032	9.82186	-0.0258122	14.9098	-0.0844122	28.437	-0.108465	24.9931	-0.183752	47.0528
		-0.017008	9.9708	-0.0258776	15.2831	-0.0843918	29.3428	-0.108473	24.9356	-0.18384	47.0696
		-0.017024	10.3543	-0.0259347	15.2897	-0.0845673	29.1942	-0.108478	24.7897	-0.183944	47.0942
		-0.017072	10.8079	-0.0258653	14.7724	-0.0844082	28.8711	-0.108494	24.8828	-0.18404	47.1124
		-0.01704	11.1784	-0.0257755	14.8873	-0.0844735	29.6071	-0.108502	25.0876	-0.184152	47.1279
		-0.017088	11.7663	-0.0258449	15.6399	-0.0844816	29.035	-0.108494	25.0559	-0.184288	47.1344
		-0.017312	12.8346	-0.0259429	15.7509	-0.0843959	29.068	-0.108482	25.1246	-0.184416	47.1577
		-0.017744	13.8851	-0.025898	15.0598	-0.0845714	29.2794	-0.108478	25.4734	-0.184584	47.1798
		-0.018232	14.2697	-0.0258163	14.8953	-0.0844612	28.5983	-0.108461	25.5646	-0.18472	47.1901
		-0.01844	14.0935	-0.0258286	15.4199	-0.0844408	28.8804	-0.108416	25.632	-0.184816	47.2083
		-0.018456	14.1945	-0.0258939	15.5956	-0.0845755	28.7284	-0.108408	25.912	-0.184928	47.229
		-0.018656	14.6981	-0.025898	15.406	-0.0844082	28.3861	-0.108408	26.0138	-0.184984	47.2458
		-0.019112	15.0942	-0.0258327	15.2805	-0.0844735	28.9688	-0.10842	26.1499	-0.185104	47.2626
		-0.01948	15.0889	-0.0258	15.4324	-0.0844571	28.3108	-0.108457	26.4406	-0.185232	47.2769
		-0.019648	15.1421	-0.0258245	15.632	-0.0843714	28.4119	-0.108449	26.6989	-0.185376	47.2987
		-0.0198	15.3443	-0.0258408	15.6207	-0.0844653	28.472	-0.108453	27.1534	-0.185512	47.3205
		-0.02008	15.5749	-0.0258286	15.3558	-0.0844286	27.9502	-0.108445	27.608	-0.185672	47.3332
		-0.020336	15.6773	-0.0258041	15.2957	-0.0844653	28.1966	-0.108461	28.0144	-0.185848	47.3551
		-0.020624	15.8289	-0.0258245	15.5917	-0.0845551	27.7533	-0.108437	28.3031	-0.185936	47.3717
		-0.020936	15.9067	-0.0258653	15.7442	-0.0844612	27.4316	-0.108482	28.7425	-0.186032	47.3924
		-0.021208	15.965	-0.0259061	15.3947	-0.0845102	27.5286	-0.108482	29.0095	-0.186208	47.408
		-0.021456	16.0959	-0.0258122	14.8959	-0.0844367	27.1672	-0.108478	29.322	-0.186368	47.4235
		-0.02176	16.2346	-0.0257633	15.0293	-0.0844204	27.119	-0.108437	29.3913	-0.18652	47.4404
		-0.02204	16.3175	-0.0258571	15.4608	-0.0844286	27.0403	-0.108449	29.7746	-0.186672	47.4559
		-0.022304	16.4532	-0.0258816	15.291	-0.0843592	26.7146	-0.108429	29.8241	-0.1868	47.4767
		-0.022616	16.5927	-0.0258327	14.81	-0.0844531	27.0998	-0.10842	29.9576	-0.18692	47.4948
		-0.02284	16.6534	-0.0257918	14.7168	-0.0844694	26.2271	-0.108449	30.1142	-0.187048	47.5168
		-0.02308	16.7181	-0.0258041	15.0981	-0.084249	26.5455	-0.108482	30.428	-0.187176	47.5363
		-0.023384	16.7945	-0.0258898	15.0306	-0.0844857	27.1659	-0.108469	30.3586	-0.187328	47.5518
		-0.02364	16.8645	-0.0259143	14.1552	-0.0844041	26.1405	-0.108465	30.5178	-0.187536	47.5713
		-0.023872	16.9786	-0.0257918	13.7311	-0.0842898	26.9557	-0.108494	30.7318	-0.187704	47.5946
		-0.02412	17.0887	-0.0257837	14.3607	-0.0844531	27.1929	-0.108461	30.7351	-0.187872	47.6127
		-0.0244	17.1263	-0.0259592	14.5722	-0.0843633	26.7298	-0.108441	30.7041	-0.187992	47.6257
		-0.024688	17.2559	-0.0259592	13.7814	-0.0843755	27.2134	-0.108441	30.8925	-0.188208	47.6425
		-0.024968	17.3531	-0.0258571	13.2997	-0.0844	27.1784	-0.108461	31.0391	-0.1884	47.6607
		-0.025256	17.3233	-0.0258653	13.2238	-0.0844041	27.1843	-0.108465	30.9916	-0.188552	47.6749
		-0.025488	17.3233	-0.0258776	13.1041	-0.084449	27.185	-0.108469	30.9949	-0.188672	47.6918
		-0.025728	17.4373	-0.0259347	12.937	-0.0844041	26.8679	-0.108469	31.0378	-0.188792	47.7099
		-0.025992	17.5579	-0.0258653	12.6211	-0.0843633	27.1982	-0.108478	31.0206	-0.188912	47.732
		-0.026248	17.6201	-0.0258408	12.5576	-0.0844898	27.0126	-0.108469	30.7292	-0.189056	47.7592
		-0.026528	17.7186	-0.0258694	13.1516	-0.084298	26.8295	-0.108461	30.7147	-0.189232	47.7825
		-0.0268	17.8339	-0.0260041	13.4464	-0.0844122	27.4466	-0.10849	30.8131	-0.1894	47.7903
		-0.027048	17.5787	-0.0259837	12.9389	-0.0844327	27.2121	-0.108478	30.6864	-0.189552	47.8032
		-0.027088	16.6357	-0.0259469	12.8087	-0.0844163	27.3231	-0.108494	30.6461	-0.18968	47.8201
		-0.027048	15.3821	-0.0259347	12.7909	-0.0844449	27.4109	-0.10849	30.6844	-0.18984	47.846
		-0.026968	14.4133	-0.0259102	12.8193	-0.0844408	27.3978	-0.108478	30.4974	-0.189952	47.8655
		-0.026936	13.9755	-0.0259102	12.7592	-0.0844857	27.7657	-0.108478	30.4452	-0.190144	47.8823
		-0.026952	13.8628	-0.0258694	12.67	-0.0844939	27.372	-0.108469	30.2028	-0.19032	47.9043
		-0.027024	13.8032	-0.0258571	12.6654	-0.0843633	27.5788	-0.108445	29.9781	-0.190456	47.9264
		-0.027016	13.5984	-0.0258531	12.9442	-0.0844898	27.9574	-0.108433	30.0039	-0.190584	47.9419
		-0.027024	13.3716	-0.0259184	13.2032	-0.0843714	27.1461	-0.108445	29.885	-0.190704	47.9549
		-0.027008	13.1556	-0.0259184	13.1596	-0.0843224	27.7539	-0.108424	29.4707	-0.190816	47.9691
		-0.027008	12.954	-0.0259102	13.2072	-0.0844653	27.6859	-0.108429	29.3279	-0.190888	47.9808
		-0.027008	12.8401	-0.025898	13.2588	-0.0843306	27.1851	-0.108449	29.1468	-0.191056	47.9938
		-0.027048	12.7961	-0.0258612	13.3083	-0.0844531	27.8273	-0.108453	28.6961	-0.191184	48.0054
		-0.027056	12.7054	-0.0259102	13.3815	-0.0844898	27.5036	-0.108453	28.4515	-0.191368	48.0093
		-0.027056	12.5537	-0.025898	13.1417	-0.0844	27.6469	-0.108453	28.2633	-0.191512	48.0093
		-0.027008	12.2531	-0.0258	13.0313	-0.0844571	27.9443	-0.108469	28.0149	-0.191632	48.0106
		-0.026992	11.9485	-0.0257551	13.8433	-0.0844	27.637	-0.108482	27.9344	-0.191792	48.0158
		-0.026984	11.8059	-0.0259469	14.7901	-0.0843714	28.1147	-0.108473	27.7078	-0.191928	48.0197
		-0.026984	11.9304	-0.0259714	14.1995	-0.0844776	27.8894	-0.108473	27.4885	-0.192096	48.0197
		-0.026952	12.2621	-0.0257755	13.7455	-0.0843347	27.5776	-0.108469	27.6199	-0.19224	48.0119
		-0.027	12.8306	-0.0257469	14.66	-0.0844245	28.4325	-0.108453	27.5373	-0.19236	48.0093
		-0.02708	13.2553	-0.0259388	15.3147	-0.0844857	27.787	-0.10842	27.3007	-0.19252	48.0132
		-0.027064	13.1972	-0.0259714	14.8383	-0.084298	27.7843	-0.108441	27.456	-0.192608	48.0158
		-0.02704	12.8179	-0.0258286	14.4974	-0.0844653	28.1648	-0.108441	27.4078	-0.192728	48.0106
		-0.027016	12.5213	-0.0258	14.9388	-0.0843714	27.4546	-0.108449	27.0616	-0.192792	48.0132
		-0.026984	12.4436	-0.025902	15.3062	-0.0843796	27.52	-0.108461	27.1944	-0.192888	48.0119
		-0.026944	12.5978	-0.0259102	15.106	-0.0844367	27.4229	-0.108482	27.3134	-0.193	48.0171
		-0.026992	12.9835	-0.0258204	14.7572	-0.084449	27.4453	-0.108465	27.1839	-0.193168	48.0158
		-0.027056	13.5274	-0.0257878	15.0142	-0.0844694	27.551	-0.108473	27.3604	-0.193328	48.0119
		-0.027056	14.1077	-0.0259102	15.6849	-0.0844694	27.2253	-0.108482	27.5956	-0.193448	48.0106
		-0.027056	14.6166	-0.0259469	15.7892	-0.0844408	27.452	-0.108486	27.8256	-0.193536	48.0158
		-0.027064	14.8006	-0.0259306	15.5507	-0.0844857	27.2669	-0.108473	28.062	-0.193656	48.0106
		-0.027016	14.6375	-0.0258816	15.5044	-0.0843837	26.8032	-0.108498	28.3495	-0.193768	48.0132
		-0.027	14.4395	-0.0258694	15.7528	-0.0844776	27.1117	-0.108498	28.6771	-0.193848	48.1117
		-0.026936	14.5016	-0.0259347	15.8835	-0.0845184	26.6063	-0.108465	28.9758	-0.193976	48.1946
		-0.02696	14.9145	-0.0259469	15.6325	-0.0843551	26.6287	-0.108465	29.1244	-0.194096	48.0586
		-0.026968	15.5167	-0.0258367	15.1747	-0.0844776	26.8461	-0.108482	29.3385	-0.194184	47.6104
		-0.027008	15.9741	-0.0257633	15.6815	-0.0844	26.0639	-0.108461	29.7316	-0.194208	47.3502
		-0.027032	16.3211	-0.0258612	16.3917	-0.0843306	26.6136	-0.108465	29.836	-0.194336	47.669
		-0.027016	16.404	-0.0259184	16.142	-0.0844449	26.4478	-0.108469	29.9999	-0.194488	48.0858
		-0.027008	16.2201	-0.0258286	15.4291	-0.0843224	25.7832	-0.108453	30.3137	-0.19472	48.297
		-0.026968	16.1256	-0.0258041	15.439	-0.0844367	26.6454	-0.108424	30.4875	-0.194816	48.2206
		-0.026952	16.4932	-0.0258531	15.5877	-0.084498	26.1691	-0.108396	30.4491	-0.194904	48.3126
		-0.027072	16.9632	-0.0258857	15.4457	-0.0843592	26.2397	-0.108429	30.9274	-0.195056	48.4357
		-0.027152	16.8933	-0.0258327	14.8947	-0.0844571	26.6606	-0.108461	31.1428	-0.19528	48.4176
		-0.027152	16.4687	-0.0257755	14.7064	-0.0844408	26.5766	-0.108445	31.0682	-0.19544	48.3424
		-0.027008	16.1114	-0.0257714	15.0056	-0.0844531	26.8508	-0.108473	31.4191	-0.195504	48.332
		-0.026928	15.9507	-0.0258612	15.2415	-0.0844939	26.942	-0.10851	31.5677	-0.195672	48.507
		-0.026944	15.8393	-0.025902	14.629	-0.0844122	26.862	-0.108441	31.3813	-0.195792	48.551
		-0.026944	15.8406	-0.0257878	14.1651	-0.0844612	27.0477	-0.108437	31.563	-0.195912	48.5588
		-0.026944	16.2044	-0.0257714	14.6957	-0.0844286	26.9261	-0.108437	31.6548	-0.196056	48.5329
		-0.026984	16.7496	-0.025902	15.2751	-0.0844163	26.9379	-0.108433	31.6336	-0.196208	48.6145
		-0.027048	16.8622	-0.0260082	14.8925	-0.0843796	27.0291	-0.108437	31.7077	-0.196392	48.6703
		-0.027064	16.5296	-0.0259184	14.3738	-0.0844082	27.1242	-0.108461	31.6707	-0.196536	48.6392
		-0.027032	16.0713	-0.0258286	14.5588	-0.084449	27.2814	-0.108437	31.6958	-0.196648	48.7568
		-0.027016	15.698	-0.0259143	14.8905	-0.0844122	27.0343	-0.108449	31.6992	-0.196768	48.7464
		-0.027008	15.1373	-0.0259796	14.6341	-0.0844	27.4248	-0.108441	31.5083	-0.196936	48.7529
		-0.026984	14.6505	-0.0258653	13.947	-0.084502	27.3303	-0.108449	31.5916	-0.197016	48.7582
		-0.026992	14.4097	-0.0258041	13.8229	-0.0844245	27.3647	-0.108457	31.5625	-0.197248	48.8927
		-0.026984	14.3592	-0.0258327	14.2544	-0.0844	27.588	-0.108445	31.162	-0.197384	48.815
		-0.02704	14.2438	-0.0259224	14.2669	-0.0844	27.6171	-0.108461	31.2116	-0.19748	48.881
		-0.027112	14.0131	-0.0258898	13.6617	-0.0843224	27.9256	-0.108461	31.2281	-0.197608	49.0076
		-0.027048	13.5741	-0.0257755	13.556	-0.0844735	28.1813	-0.108437	30.9063	-0.197704	49.0878
		-0.026984	13.1339	-0.0257918	14.3904	-0.0843592	27.9164	-0.10842	30.8456	-0.197888	49.1758
		-0.026976	12.695	-0.0259265	14.648	-0.0844449	28.7218	-0.108433	30.8436	-0.198056	49.0039
		-0.026984	12.4475	-0.0259224	13.9596	-0.084449	28.0974	-0.108437	30.5185	-0.198192	48.7645
		-0.026992	12.3658	-0.0257796	13.6207	-0.0843388	28.221	-0.108441	30.171	-0.198264	48.8214
		-0.027008	12.2932	-0.025751	13.9663	-0.0844	28.6775	-0.108457	29.9199	-0.198464	49.1358
		-0.026968	12.0159	-0.0258612	14.2669	-0.0843184	28.0625	-0.108473	29.7448	-0.19864	49.1849
		-0.026968	11.6859	-0.0259143	13.8659	-0.0842939	28.4958	-0.108478	29.3873	-0.198728	49.1732
		-0.026968	11.4777	-0.0257633	13.593	-0.0844449	28.5011	-0.108465	28.9381	-0.198824	49.2562
		-0.027008	11.3768	-0.0257551	14.3045	-0.0843388	27.9593	-0.108473	28.5787	-0.198936	49.2769
		-0.027016	11.1514	-0.0259429	15.024	-0.0844163	28.4879	-0.108478	28.1922	-0.199056	49.3469
		-0.02696	10.8274	-0.0259878	14.7016	-0.0844	28.102	-0.108441	27.6398	-0.199232	49.33
		-0.026936	10.6524	-0.025849	14.2272	-0.0842857	28.2566	-0.108469	27.3709	-0.199408	49.2873
		-0.026976	10.6913	-0.0257837	14.6547	-0.0843714	28.696	-0.108453	27.0683	-0.199504	49.203
		-0.027008	10.7172	-0.0259184	15.2527	-0.0843306	28.4337	-0.10842	26.9519	-0.199616	49.308
		-0.02704	10.6848	-0.0259592	14.8583	-0.084302	28.9292	-0.108429	26.7603	-0.19972	49.4143
		-0.027064	10.5733	-0.0258041	14.263	-0.0844653	28.8136	-0.108433	26.5133	-0.199824	49.5102
		-0.027048	10.3349	-0.025751	14.8953	-0.0844204	28.6729	-0.108424	26.3052	-0.199984	49.4726
		-0.026984	10.1236	-0.0259224	15.7615	-0.0844204	28.6438	-0.108416	26.1321	-0.200128	49.4117
		-0.02692	10.1638	-0.0259388	15.5064	-0.0844327	28.7383	-0.108429	26.099	-0.200232	49.378
		-0.026968	10.6057	-0.0258082	15.1477	-0.0844408	28.108	-0.108445	26.1241	-0.200368	49.6113
		-0.027064	11.1252	-0.0257388	15.62	-0.0843429	28.3234	-0.108457	26.0567	-0.200544	49.6385
		-0.027128	11.3312	-0.0258408	16.2324	-0.0844163	28.3161	-0.108453	25.902	-0.200688	49.6164
		-0.027104	11.1758	-0.0258857	16.2886	-0.0844694	28.3068	-0.108486	25.9641	-0.200776	49.5918
		-0.027048	10.852	-0.025849	15.9074	-0.0844612	28.0848	-0.10849	25.6423	-0.200848	49.6981
		-0.02696	10.4684	-0.0257673	16.0045	-0.084498	28.071	-0.108437	25.491	-0.200984	49.7201
		-0.026928	10.2675	-0.0258653	16.7147	-0.0844694	27.9494	-0.108453	25.5154	-0.2012	49.8549
		-0.026912	10.4528	-0.0259673	16.613	-0.0844408	28.0202	-0.108461	25.6642	-0.2014	49.6359
		-0.026912	10.993	-0.0258857	15.6504	-0.084502	28.3592	-0.108465	25.6516	-0.201512	49.5335
		-0.02692	11.7053	-0.0257551	15.618	-0.0843755	27.6952	-0.108437	25.6615	-0.20168	49.5931
		-0.026968	12.3671	-0.0258408	16.5449	-0.0844327	28.4021	-0.108473	25.8275	-0.20192	49.8108
		-0.027016	12.8787	-0.0259184	16.6441	-0.084498	27.8505	-0.108506	25.9405	-0.202272	49.7797
		-0.027032	13.1647	-0.0258612	16.2496	-0.0843673	27.7262	-0.108494	25.7746	-0.20268	49.886
		-0.027016	13.2113	-0.0258082	16.1882	-0.0843673	27.6172	-0.108469	25.721	-0.203056	49.9366
		-0.027008	13.2386	-0.0258286	16.5847	-0.084449	27.8709	-0.108469	25.8308	-0.20352	49.9301
		-0.027	13.5482	-0.0258571	16.6996	-0.0844122	27.5201	-0.108453	25.9682	-0.204088	50.0221
		-0.027024	14.0805	-0.0258653	16.391	-0.0843918	27.6654	-0.108449	26.1888	-0.20464	50.0208
		-0.027	14.561	-0.0258041	15.9853	-0.0844531	27.6812	-0.108445	26.537	-0.20504	50.1711
		-0.02704	14.7812	-0.0257837	16.0805	-0.084498	27.8655	-0.108441	26.9295	-0.205328	50.1154
		-0.02708	14.6219	-0.0258327	16.393	-0.0843918	27.4216	-0.108437	27.1475	-0.20572	50.2152
		-0.027056	14.3229	-0.0259143	16.1961	-0.0844327	28.0063	-0.108429	27.3298	-0.206128	50.2074
		-0.026984	14.249	-0.0258612	15.5334	-0.0845102	27.6502	-0.108429	27.6113	-0.2066	50.2463
		-0.026928	14.5946	-0.0257796	15.3875	-0.0844041	27.6945	-0.108433	27.8268	-0.20708	50.2748
		-0.026968	15.1968	-0.0258163	15.9999	-0.0844612	28.1286	-0.108461	28.1452	-0.207656	50.3602
		-0.02704	15.7097	-0.0259224	15.8507	-0.0844939	27.5908	-0.108478	28.4042	-0.208096	50.3615
		-0.027072	15.9546	-0.0259102	15.036	-0.0843837	28.0804	-0.108457	28.549	-0.208528	50.4067
		-0.027064	15.882	-0.0258367	14.7103	-0.0845673	28.3414	-0.108453	28.917	-0.209032	50.3407
		-0.02704	15.558	-0.0258449	14.9369	-0.0844449	27.9449	-0.108453	29.1343	-0.209512	50.3757
		-0.026992	15.2198	-0.0258939	14.958	-0.0844122	28.6828	-0.108433	29.1349	-0.209928	50.3951
		-0.02692	15.2016	-0.0259061	14.664	-0.0845796	28.6762	-0.108437	29.4844	-0.21044	50.386
		-0.026968	15.5892	-0.0258122	14.3012	-0.0844571	28.5487	-0.108453	29.5063	-0.210872	50.461
		-0.02704	16.0998	-0.025751	14.5866	-0.0845673	29.1466	-0.108469	29.4825	-0.211328	50.4287
		-0.02704	16.2242	-0.0259143	15.209	-0.0844898	28.548	-0.108461	29.5816	-0.211696	50.47
		-0.027088	15.9481	-0.0260041	14.5192	-0.0844776	28.9074	-0.108457	29.6985	-0.21212	50.5722
		-0.027096	15.5853	-0.0258531	13.6517	-0.0846245	29.2926	-0.108457	29.7533	-0.212552	50.5878
		-0.02704	15.3649	-0.0257796	14.0436	-0.0845102	28.6035	-0.108457	29.8504	-0.212952	50.3678
		-0.026992	15.1926	-0.0259673	14.7002	-0.0844816	29.3725	-0.108449	29.9106	-0.213152	49.7967
		-0.027	15.085	-0.0259673	13.8665	-0.0846653	29.0396	-0.108473	30.1015	-0.213096	48.912
		-0.026952	14.9532	-0.0258122	13.3379	-0.0844408	28.7376	-0.108486	29.9675	-0.213136	48.2761
		-0.026952	14.8422	-0.0257633	13.959	-0.0844531	29.2688	-0.108482	29.8816	-0.213184	48.1117
		-0.026976	14.6909	-0.0259224	14.5866	-0.0843755	28.908	-0.108494	29.9827	-0.2132	47.8732
		-0.02704	14.4564	-0.0259224	14.0019	-0.0843592	29.103	-0.108486	29.7752	-0.213184	47.6996
		-0.027048	14.1388	-0.0258041	13.6214	-0.0843469	29.0574	-0.108469	29.7898	-0.213192	47.7022
		-0.027088	13.8459	-0.0257551	13.9253	-0.0843102	28.8109	-0.108498	29.9206	-0.213152	47.7384
		-0.02708	13.3746	-0.0258776	14.4062	-0.0843551	29.1624	-0.108486	29.6345	-0.213144	47.7061
		-0.02704	12.7802	-0.0259184	14.0971	-0.0843714	28.91	-0.108473	29.2182	-0.213152	47.6349
		-0.026984	12.4073	-0.0258041	13.7251	-0.0843388	29.0276	-0.108469	29.0041	-0.21324	47.3811
		-0.027008	12.3762	-0.0257796	14.1776	-0.0844653	29.2972	-0.108457	28.5839	-0.21324	46.722
		-0.027008	12.3969	-0.0259184	14.9968	-0.0844163	29.1313	-0.10842	28.1287	-0.213136	46.3026
		-0.027024	12.358	-0.026	14.7762	-0.0844367	29.3553	-0.108416	27.8624	-0.213128	46.7362
		-0.02708	12.244	-0.0258694	14.1472	-0.0844694	29.2179	-0.108424	27.7131	-0.213112	47.4095
		-0.027104	12.025	-0.0257918	14.7974	-0.0844653	29.237	-0.108449	27.6338	-0.21312	47.7268
		-0.027088	11.6806	-0.025951	15.7118	-0.0844367	29.2635	-0.108441	27.3854	-0.213136	47.9069
		-0.027032	11.3169	-0.0260082	15.3373	-0.0844694	29.2165	-0.108457	27.1654	-0.213168	48.1726
		-0.02696	11.1345	-0.0258327	14.6601	-0.0844449	28.982	-0.108441	27.0742	-0.213216	48.3605
		-0.026968	11.1721	-0.0257878	15.3928	-0.084449	28.9681	-0.108453	26.9322	-0.213256	48.3864
		-0.026992	11.2058	-0.0259388	16.0152	-0.0844653	28.4983	-0.108437	26.4274	-0.2132	48.1376
		-0.027032	11.2369	-0.0259429	15.5414	-0.0843878	28.3484	-0.108416	26.0904	-0.213168	48.0352
		-0.027008	11.2382	-0.0257714	15.0729	-0.0844735	28.3814	-0.108433	25.982	-0.213128	48.1026
		-0.027056	11.1708	-0.0257469	15.8234	-0.0844082	27.9289	-0.108453	25.6595	-0.213152	48.1687
		-0.02704	11.071	-0.0258898	16.3685	-0.084449	28.1667	-0.108457	25.4744	-0.213144	48.1856
		-0.027024	10.9401	-0.0259469	15.8756	-0.0843837	27.8668	-0.108457	25.341	-0.213112	48.2283
		-0.026992	10.8611	-0.0258	15.4079	-0.0843714	28.026	-0.108453	25.238	-0.213144	48.4602
		-0.026984	10.8287	-0.0257633	16.1129	-0.0844367	27.8728	-0.108449	25.2711	-0.213168	48.3501
		-0.026968	10.8403	-0.0258735	16.7075	-0.0843265	27.7671	-0.108433	25.2302	-0.213152	48.2088
		-0.02696	10.9543	-0.0258816	16.4267	-0.0844204	27.9474	-0.108433	25.1258	-0.21308	48.1959
		-0.026936	11.3841	-0.0257714	15.9893	-0.0843592	27.559	-0.108449	25.3213	-0.213152	48.4304
		-0.026992	12.0368	-0.0257755	16.4042	-0.0843796	27.9336	-0.108469	25.285	-0.2132	48.2813
		-0.026968	12.6274	-0.0258816	16.948	-0.084351	27.3893	-0.108449	25.0921	-0.213224	47.8992
		-0.026976	13.1505	-0.0259755	16.5463	-0.0843796	27.5763	-0.108449	25.0307	-0.213224	47.8188
		-0.026984	13.6075	-0.0258367	15.7786	-0.084351	27.5201	-0.108441	25.0353	-0.213184	47.9108
		-0.027024	13.8978	-0.0257429	15.9874	-0.0844082	27.5393	-0.108433	24.9322	-0.213168	48.0171
		-0.027088	14.2062	-0.0258327	16.6646	-0.0843918	27.384	-0.108437	25.1152	-0.213104	48.1402
		-0.027056	14.6193	-0.0258857	16.5278	-0.0844163	27.7229	-0.108441	25.3352	-0.213104	48.2556
		-0.02704	14.8871	-0.0258122	15.9761	-0.0844122	27.6429	-0.108445	25.8479	-0.21316	48.3476
		-0.027016	15.1796	-0.0257714	15.9569	-0.0844408	27.6773	-0.108457	26.1486	-0.21316	48.3981
		-0.026984	15.5775	-0.0258327	16.3276	-0.0843837	27.7228	-0.108461	26.5966	-0.2132	48.4098
		-0.027	16.0739	-0.0258776	16.2001	-0.0844041	27.8728	-0.108449	26.9626	-0.2132	48.3437
		-0.027056	16.3627	-0.0258735	15.353	-0.0843673	27.6495	-0.10849	27.4145	-0.213192	48.2918
		-0.02704	16.2888	-0.0257959	15.0228	-0.0843429	27.6647	-0.108461	27.4548	-0.213168	48.3152
		-0.02692	16.0621	-0.0257592	15.4476	-0.084302	27.8391	-0.108437	27.8004	-0.213152	48.3774
		-0.026928	16.242	-0.0258939	15.696	-0.0843755	27.8352	-0.108429	28.1327	-0.213152	48.3968
		-0.026984	16.7392	-0.0259388	15.1021	-0.0843551	27.7394	-0.108437	28.3216	-0.213168	48.3942
		-0.027064	17.068	-0.0258367	14.6674	-0.0843878	27.9185	-0.1084	28.5496	-0.213144	48.3605
		-0.027096	16.8636	-0.0257714	15.04	-0.0844367	28.0956	-0.108408	28.9593	-0.213152	48.3631
		-0.027064	16.5063	-0.0259143	15.4285	-0.0844408	27.826	-0.108412	29.2507	-0.213152	48.3994
		-0.026944	16.3666	-0.0259592	14.8173	-0.0844041	28.0057	-0.108388	29.4119	-0.21316	48.5107
		-0.026928	16.7199	-0.0257796	14.1592	-0.0844694	28.1873	-0.108416	29.7799	-0.213256	48.4056
		-0.027032	17.1705	-0.0257388	14.4307	-0.0844653	28.2514	-0.10842	29.737	-0.213264	47.898
		-0.027088	17.1911	-0.0258857	14.8939	-0.0844694	28.3175	-0.10842	29.8949	-0.213216	47.0718
		-0.027072	16.817	-0.0259102	14.4684	-0.0844531	28.7073	-0.108449	30.1413	-0.213184	46.7469
		-0.02696	16.5065	-0.0257959	13.8044	-0.0845837	28.5454	-0.108473	30.136	-0.213192	46.7793
		-0.026896	16.6851	-0.0257469	13.883	-0.0844816	28.3769	-0.108449	30.2265	-0.213232	46.9815
		-0.026984	17.111	-0.0258327	14.5093	-0.0846041	28.8433	-0.108453	30.7391	-0.213224	47.0256
		-0.027096	17.414	-0.0259184	14.1307	-0.0845143	28.3887	-0.108473	30.7563	-0.213168	46.7936
		-0.027104	17.2118	-0.0257878	13.2679	-0.0845184	28.3557	-0.108433	30.6294	-0.213168	46.5668
		-0.027096	16.7586	-0.0256735	13.3478	-0.0844204	28.431	-0.108429	30.9644	-0.21324	46.4151
		-0.027096	16.3509	-0.0258367	14.2154	-0.0844531	28.5077	-0.108453	31.1118	-0.213192	46.076
		-0.027056	16.0557	-0.0259347	13.8118	-0.0843592	28.1708	-0.108429	30.9123	-0.213136	45.8
		-0.027024	15.8471	-0.0258245	13.009	-0.0844449	28.581	-0.108445	31.0807	-0.213144	45.7998
		-0.026976	15.6643	-0.0257347	13.1775	-0.0844286	28.4125	-0.108473	31.2854	-0.21316	45.9188
		-0.026968	15.5127	-0.0259143	14.1177	-0.0844531	28.4588	-0.108465	31.2497	-0.213184	45.9395
		-0.027008	15.352	-0.0259878	13.646	-0.0844653	28.4086	-0.108453	31.3396	-0.2132	45.9278
		-0.027024	15.1667	-0.0258449	12.941	-0.0845102	28.3854	-0.108449	31.3079	-0.213192	45.8669
		-0.027024	15.0422	-0.0257551	13.3229	-0.0844367	28.0597	-0.108433	31.1692	-0.213152	45.4915
		-0.027	14.9363	-0.0259224	14.2677	-0.0844612	28.1086	-0.108453	31.2465	-0.213128	45.203
		-0.027024	14.732	-0.0259837	14.0093	-0.0844653	27.7862	-0.108478	31.1528	-0.213128	45.0504
		-0.027048	14.4084	-0.025849	13.5475	-0.0844	27.8841	-0.108457	30.8389	-0.21316	45.0296
		-0.027016	13.85	-0.0257755	14.0013	-0.0844939	27.995	-0.108486	30.9704	-0.213208	44.8508
		-0.026976	13.323	-0.0259673	14.8608	-0.0844122	27.4764	-0.108482	31.0715	-0.21316	44.4985
		-0.026952	13.0836	-0.0260082	14.7398	-0.0844816	28.0295	-0.108461	30.6922	-0.213184	44.2614
		-0.026928	13.1148	-0.0258816	14.1293	-0.0845306	27.7091	-0.108429	30.4378	-0.213184	44.2404
		-0.027016	13.0746	-0.0258163	14.5271	-0.0844245	27.6264	-0.108453	30.4497	-0.213208	44.2909
		-0.027096	12.9412	-0.0259714	15.3338	-0.0844653	27.7453	-0.108449	30.2032	-0.2132	44.2249
		-0.027072	12.7689	-0.026	15.1481	-0.0844571	27.2723	-0.108429	29.8603	-0.213224	43.9442
		-0.027056	12.5913	-0.0258694	14.3798	-0.0844531	27.4698	-0.108424	29.7521	-0.213232	43.6945
		-0.02704	12.3917	-0.0257959	15.0206	-0.0844816	27.224	-0.108441	29.6094	-0.213208	43.4718
		-0.027016	12.1507	-0.0259347	15.8175	-0.0843633	26.926	-0.108429	29.17	-0.21316	43.5156
		-0.026968	11.9977	-0.0259918	15.4641	-0.0844286	27.1705	-0.108408	28.96	-0.213144	43.7385
		-0.026976	11.8591	-0.0258449	14.7208	-0.0844041	26.7926	-0.108433	28.8338	-0.213184	43.6464
		-0.02696	11.7411	-0.0258082	15.3399	-0.0843102	26.9716	-0.10842	28.512	-0.213136	43.2178
		-0.026952	11.7061	-0.0259265	15.9207	-0.0844245	27.0291	-0.1084	28.2465	-0.213128	42.9379
		-0.026968	11.7567	-0.0259469	15.554	-0.0844082	26.8546	-0.108416	28.1884	-0.213112	42.9288
		-0.027024	11.7048	-0.0257959	14.9455	-0.0844245	26.8943	-0.108441	27.9373	-0.213128	43.2929
		-0.027016	11.653	-0.0257469	15.5546	-0.0844163	26.7285	-0.10842	27.7398	-0.213216	43.4225
		-0.027008	11.6413	-0.0259061	16.1612	-0.0844367	26.6611	-0.108437	27.6379	-0.213224	42.9719
		-0.026992	11.7696	-0.0259714	15.698	-0.0844571	26.5944	-0.108449	27.5328	-0.2132	42.7594
		-0.027008	12.1416	-0.0258041	15.0373	-0.0844531	26.4484	-0.108433	27.3365	-0.213112	43.126
		-0.02704	12.6961	-0.0257673	15.5757	-0.0844776	26.6677	-0.108445	27.2949	-0.213112	43.5676
		-0.027048	13.0535	-0.0258898	16.0773	-0.0845429	26.3717	-0.108469	27.121	-0.213216	43.8654
		-0.027056	13.025	-0.025898	15.4054	-0.0843959	26.4801	-0.108445	27.0345	-0.213208	44.1578
		-0.027072	12.7559	-0.025751	14.6793	-0.0845061	26.7166	-0.108445	27.1733	-0.2132	44.5747
		-0.026992	12.6172	-0.0257592	14.9086	-0.0844204	25.9661	-0.108445	27.2572	-0.213208	44.913
		-0.026936	12.7739	-0.0258653	15.3473	-0.0844898	26.5872	-0.108453	27.0557	-0.213216	45.2875
		-0.02692	13.3618	-0.0259551	15.0135	-0.0845469	26.4676	-0.108461	27.145	-0.21324	45.6915
		-0.026976	14.179	-0.0258816	14.5378	-0.0844612	26.3758	-0.108441	27.2097	-0.213192	45.9113
		-0.02704	14.8329	-0.0258735	14.4955	-0.0845347	26.6889	-0.108424	27.1634	-0.213192	46.2415
		-0.027072	15.2653	-0.0258776	14.8193	-0.0844612	26.4266	-0.108433	27.2791	-0.213144	46.5538
		-0.027056	15.619	-0.0259184	14.6746	-0.0843592	26.7715	-0.108437	27.3847	-0.213144	46.87
		-0.027048	15.8263	-0.0258408	13.9345	-0.0844204	26.7834	-0.108429	27.4343	-0.213208	46.8584
		-0.026992	15.7758	-0.0257714	13.7013	-0.0844041	26.8223	-0.108494	27.6028	-0.213232	47.0162
		-0.026952	15.5853	-0.0257347	13.9563	-0.0844082	27.1466	-0.108506	27.7006	-0.213216	46.9761
		-0.026912	15.7784	-0.0258612	14.1828	-0.0844163	27.4102	-0.108482	27.9146	-0.213192	47.0021
		-0.02696	16.2963	-0.0258531	13.5737	-0.0844327	27.467	-0.108457	28.2708	-0.213128	47.235
		-0.02708	16.7987	-0.0257469	13.2857	-0.0844857	27.5133	-0.108449	28.6625	-0.213208	47.2763
		-0.027128	16.9462	-0.0256939	13.5632	-0.0843918	27.2642	-0.108445	28.8402	-0.213216	46.753
		-0.027072	16.836	-0.0258367	14.1724	-0.0844245	27.9335	-0.108449	28.938	-0.213176	46.1508
[truncated: 29,396 more rows]
