# Supplementary material for: Investigation of the Effect of Confining Pressure on the Mechanics-Permeability Behavior of Mudstone under Triaxial Compression
Source: Hindawi journal article supplement (doi:10.1155/2019/1796380), 2019-06-04
Supplement: f1 [file 1796380.f1.zip › Table_S4.xlsx]

## Sheet: Sheet1
Table S4: The data for relationship of permeability and strain in the direction of the maximum principal stress
P4		P5		P6		P7		P8		P9
ϵ1	k2 (μD)	ϵ1	k2 (μD)	ϵ1	k2 (μD)	ϵ1	k2 (μD)	ϵ1	k2 (μD)	ϵ1	k2 (μD)
0	1.6407	0	1.77124	0	0.912487	0	0.606617	0	0.510622	0	0.342911
0.248364	1.19988	0.10896	1.67102	0.369864	0.710134	0.890783	0.389246	0.998791	0.352888	1.53216	0.112642
0.615128	1.07041	0.342884	1.5685	1.08226	0.558073	2.29952	0.2882	3.09197	0.240278	3.71932	0.0716956
0.912504	0.933981	0.830144	1.16465	2.0539	0.46177	3.86614	0.298313	4.98734	0.265787	5.70699	0.0921618
1.7749	0.999457	1.29395	1.06338	3.72701	0.659541	4.80669	0.36397	6.08097	0.301625	7.69129	0.148424
2.5233	1.0501	1.8464	1.01254	4.50227	0.913029	5.60586	0.439797	7.16369	0.388534	9.3989	0.213679
3.45507	3.82555	3.3025	1.41755	4.91125	1.11548	6.48353	0.606617	7.934	0.470145	8.24095	0.189472
3.61863	763.467	3.83498	1.82113	5.11925	4.10456	6.764	0.657169	9.14259	0.663809
3.22213	494.691	4.06992	2.2267	5.33938	3.90341	7.19206	0.909745	7.87416	0.561684
		4.21395	8.55256	4.61942	2.63503	7.49359	0.910106
		4.23963	11.7408			6.55495	0.75722
		3.39012	6.52699
